# Supplementary material
Source: HighWire-hosted journal article supplement (doi:10.1101/rna.071209.119)
Supplement: Supplemental_Tables_S1_to_S14.xlsx [file Supplemental_Tables_S1_to_S14.xlsx]

## Sheet: Table S1
Supplementary Table 1. The list of identified PEs (n=1919)
The genomic coordinates of identified Putative enhancers (PEs) are listed. The genomic coordinates of associated DHSs for each PEs are also listed.
Chromsome	Start	Stop	PE IDs	Position of PE midpoint	Length (nt)	Genomic position of associated DHS (start;stop;length(nt))
chr1	31991	34991	PE_000001	33491	3000	33024;33957;934
chr1	119215	122215	PE_000002	120715	3000	120275;121154;880
chr1	120694	123694	PE_000003	122194	3000	122085;122302;218
chr1	130298	133298	PE_000004	131798	3000	131712;131883;172
chr1	143978	146978	PE_000005	145478	3000	145452;145504;53
chr1	144357	147357	PE_000006	145857	3000	145751;145963;213
chr1	150937	153937	PE_000007	152437	3000	152343;152530;188
chr1	202981	205981	PE_000008	204481	3000	204336;204625;290
chr1	233579	236579	PE_000009	235079	3000	235054;235103;50
chr1	253140	256140	PE_000010	254640	3000	254391;254889;499
chr1	253794	256794	PE_000011	255294	3000	255159;255429;271
chr1	273524	276524	PE_000012	275024	3000	274504;275543;1040
chr1	289858	292858	PE_000013	291358	3000	290900;291816;917
chr1	438444	441444	PE_000014	439944	3000	439828;440060;233
chr1	477428	480428	PE_000015	478928	3000	478828;479028;201
chr1	477688	480688	PE_000016	479188	3000	479112;479263;152
chr1	582573	585573	PE_000017	584073	3000	583753;584392;640
chr1	597324	600324	PE_000018	598824	3000	598613;599035;423
chr1	632019	635019	PE_000019	633519	3000	633266;633772;507
chr1	710409	713409	PE_000020	711909	3000	711709;712108;400
chr1	859100	862100	PE_000021	860600	3000	860554;860646;93
chr1	871456	874456	PE_000022	872956	3000	872931;872981;51
chr1	941888	944888	PE_000023	943388	3000	943222;943554;333
chr1	943089	946089	PE_000024	944589	3000	944454;944724;271
chr1	950482	953482	PE_000025	951982	3000	951650;952314;665
chr1	965396	968396	PE_000026	966896	3000	966656;967135;480
chr1	999172	1002172	PE_000027	1000672	3000	1000504;1000839;336
chr1	1009818	1012818	PE_000028	1011318	3000	1011034;1011602;569
chr1	1022967	1025967	PE_000029	1024467	3000	1024243;1024690;448
chr1	1029184	1032184	PE_000030	1030684	3000	1030503;1030864;362
chr1	1029528	1032528	PE_000031	1031028	3000	1030912;1031143;232
chr1	1052995	1055995	PE_000032	1054495	3000	1054439;1054550;112
chr1	1062951	1065951	PE_000033	1064451	3000	1064255;1064646;392
chr1	1082804	1085804	PE_000034	1084304	3000	1084222;1084385;164
chr1	1083215	1086215	PE_000035	1084715	3000	1084451;1084978;528
chr1	1256887	1259887	PE_000036	1258387	3000	1258213;1258561;349
chr1	1279547	1282547	PE_000037	1281047	3000	1280707;1281386;680
chr1	1281295	1284295	PE_000038	1282795	3000	1282782;1282807;26
chr1	1292942	1295942	PE_000039	1294442	3000	1294339;1294544;206
chr1	1319429	1322429	PE_000040	1320929	3000	1320534;1321324;791
chr1	1320333	1323333	PE_000041	1321833	3000	1321617;1322048;432
chr1	1323371	1326371	PE_000042	1324871	3000	1324534;1325207;674
chr1	1353622	1356622	PE_000043	1355122	3000	1354991;1355252;262
chr1	1354293	1357293	PE_000044	1355793	3000	1355345;1356240;896
chr1	1382329	1385329	PE_000045	1383829	3000	1383685;1383973;289
chr1	1386038	1389038	PE_000046	1387538	3000	1387501;1387574;74
chr1	1414715	1417715	PE_000047	1416215	3000	1416065;1416365;301
chr1	1474756	1477756	PE_000048	1476256	3000	1476090;1476422;333
chr1	1558926	1561926	PE_000049	1560426	3000	1560290;1560562;273
chr1	1592423	1595423	PE_000050	1593923	3000	1593771;1594075;305
chr1	1712007	1715007	PE_000051	1713507	3000	1713155;1713858;704
chr1	1783137	1786137	PE_000052	1784637	3000	1784572;1784702;131
chr1	1795334	1798334	PE_000053	1796834	3000	1796712;1796956;245
chr1	1797621	1800621	PE_000054	1799121	3000	1798850;1799391;542
chr1	1885976	1888976	PE_000055	1887476	3000	1887359;1887592;234
chr1	1928950	1931950	PE_000056	1930450	3000	1930309;1930591;283
chr1	1949133	1952133	PE_000057	1950633	3000	1950420;1950846;427
chr1	2091665	2094665	PE_000058	2093165	3000	2093104;2093226;123
chr1	2109679	2112679	PE_000059	2111179	3000	2110948;2111409;462
chr1	2126785	2129785	PE_000060	2128285	3000	2128165;2128404;240
chr1	2176276	2179276	PE_000061	2177776	3000	2177388;2178163;776
chr1	2205899	2208899	PE_000062	2207399	3000	2207339;2207458;120
chr1	2228041	2231041	PE_000063	2229541	3000	2229322;2229759;438
chr1	2228419	2231419	PE_000064	2229919	3000	2229869;2229968;100
chr1	2256627	2259627	PE_000065	2258127	3000	2258009;2258244;236
chr1	2259006	2262006	PE_000066	2260506	3000	2259961;2261051;1091
chr1	2273281	2276281	PE_000067	2274781	3000	2274525;2275036;512
chr1	2279235	2282235	PE_000068	2280735	3000	2280131;2281339;1209
chr1	2293191	2296191	PE_000069	2294691	3000	2294545;2294837;293
chr1	2316464	2319464	PE_000070	2317964	3000	2317680;2318248;569
chr1	2316988	2319988	PE_000071	2318488	3000	2318418;2318558;141
chr1	2363265	2366265	PE_000072	2364765	3000	2364625;2364905;281
chr1	2425371	2428371	PE_000073	2426871	3000	2426755;2426987;233
chr1	2460797	2463797	PE_000074	2462297	3000	2461862;2462731;870
chr1	2500013	2503013	PE_000075	2501513	3000	2501347;2501678;332
chr1	2500398	2503398	PE_000076	2501898	3000	2501775;2502020;246
chr1	2571941	2574941	PE_000077	2573441	3000	2573238;2573644;407
chr1	2616778	2619778	PE_000078	2618278	3000	2618204;2618352;149
chr1	2617180	2620180	PE_000079	2618680	3000	2618524;2618836;313
chr1	2629079	2632079	PE_000080	2630579	3000	2630125;2631033;909
chr1	2655439	2658439	PE_000081	2656939	3000	2656920;2656958;39
chr1	2742138	2745138	PE_000082	2743638	3000	2743606;2743669;64
chr1	2746614	2749614	PE_000083	2748114	3000	2747852;2748375;524
chr1	2778486	2781486	PE_000084	2779986	3000	2779957;2780014;58
chr1	2820789	2823789	PE_000085	2822289	3000	2822253;2822325;73
chr1	2876056	2879056	PE_000086	2877556	3000	2877442;2877670;229
chr1	2893587	2896587	PE_000087	2895087	3000	2895061;2895113;53
chr1	2942009	2945009	PE_000088	2943509	3000	2943455;2943563;109
chr1	2996569	2999569	PE_000089	2998069	3000	2997998;2998139;142
chr1	3007509	3010509	PE_000090	3009009	3000	3008864;3009154;291
chr1	3033932	3036932	PE_000091	3035432	3000	3035080;3035784;705
chr1	3047431	3050431	PE_000092	3048931	3000	3048759;3049102;344
chr1	3055678	3058678	PE_000093	3057178	3000	3057022;3057334;313
chr1	3056073	3059073	PE_000094	3057573	3000	3057357;3057788;432
chr1	3246458	3249458	PE_000095	3247958	3000	3247756;3248159;404
chr1	3282596	3285596	PE_000096	3284096	3000	3283640;3284551;912
chr1	3286071	3289071	PE_000097	3287571	3000	3286960;3288182;1223
chr1	3289135	3292135	PE_000098	3290635	3000	3290506;3290763;258
chr1	3289794	3292794	PE_000099	3291294	3000	3291277;3291311;35
chr1	3337549	3340549	PE_000100	3339049	3000	3339026;3339072;47
chr1	3382465	3385465	PE_000101	3383965	3000	3383725;3384204;480
chr1	3405507	3408507	PE_000102	3407007	3000	3406763;3407250;488
chr1	3426164	3429164	PE_000103	3427664	3000	3427480;3427847;368
chr1	3472948	3475948	PE_000104	3474448	3000	3474287;3474609;323
chr1	3476568	3479568	PE_000105	3478068	3000	3477950;3478185;236
chr1	3507832	3510832	PE_000106	3509332	3000	3509055;3509609;555
chr1	3629053	3632053	PE_000107	3630553	3000	3630496;3630609;114
chr1	3708161	3711161	PE_000108	3709661	3000	3709514;3709807;294
chr1	3708655	3711655	PE_000109	3710155	3000	3710052;3710258;207
chr1	3721219	3724219	PE_000110	3722719	3000	3722428;3723010;583
chr1	3799183	3802183	PE_000111	3800683	3000	3800531;3800835;305
chr1	3838782	3841782	PE_000112	3840282	3000	3840273;3840290;18
chr1	3842595	3845595	PE_000113	3844095	3000	3844054;3844135;82
chr1	3916919	3919919	PE_000114	3918419	3000	3918259;3918579;321
chr1	4015922	4018922	PE_000115	4017422	3000	4017307;4017536;230
chr1	4038423	4041423	PE_000116	4039923	3000	4039771;4040074;304
chr1	4284536	4287536	PE_000117	4286036	3000	4285940;4286131;192
chr1	4301261	4304261	PE_000118	4302761	3000	4302742;4302780;39
chr1	4318131	4321131	PE_000119	4319631	3000	4319478;4319783;306
chr1	4357817	4360817	PE_000120	4359317	3000	4359128;4359506;379
chr1	4507586	4510586	PE_000121	4509086	3000	4508901;4509271;371
chr1	4561984	4564984	PE_000122	4563484	3000	4563180;4563787;608
chr1	4599726	4602726	PE_000123	4601226	3000	4601135;4601316;182
chr1	4633792	4636792	PE_000124	4635292	3000	4635215;4635368;154
chr1	4725201	4728201	PE_000125	4726701	3000	4726511;4726891;381
chr1	4741526	4744526	PE_000126	4743026	3000	4742875;4743176;302
chr1	4810351	4813351	PE_000127	4811851	3000	4811667;4812035;369
chr1	4855869	4858869	PE_000128	4857369	3000	4857317;4857421;105
chr1	4871271	4874271	PE_000129	4872771	3000	4872593;4872948;356
chr1	4985653	4988653	PE_000130	4987153	3000	4987121;4987185;65
chr1	4986188	4989188	PE_000131	4987688	3000	4987484;4987891;408
chr1	5033958	5036958	PE_000132	5035458	3000	5035431;5035484;54
chr1	5039185	5042185	PE_000133	5040685	3000	5040497;5040873;377
chr1	5159618	5162618	PE_000134	5161118	3000	5160901;5161334;434
chr1	5188307	5191307	PE_000135	5189807	3000	5189416;5190197;782
chr1	5200316	5203316	PE_000136	5201816	3000	5201749;5201882;134
chr1	5230407	5233407	PE_000137	5231907	3000	5231878;5231936;59
chr1	5270678	5273678	PE_000138	5272178	3000	5271946;5272410;465
chr1	5272770	5275770	PE_000139	5274270	3000	5274039;5274501;463
chr1	5316393	5319393	PE_000140	5317893	3000	5317651;5318134;484
chr1	5383768	5386768	PE_000141	5385268	3000	5385071;5385465;395
chr1	5413129	5416129	PE_000142	5414629	3000	5414327;5414931;605
chr1	5413579	5416579	PE_000143	5415079	3000	5415025;5415132;108
chr1	5413738	5416738	PE_000144	5415238	3000	5415157;5415318;162
chr1	5425052	5428052	PE_000145	5426552	3000	5426405;5426698;294
chr1	5428807	5431807	PE_000146	5430307	3000	5430184;5430430;247
chr1	5515913	5518913	PE_000147	5517413	3000	5517406;5517420;15
chr1	5523896	5526896	PE_000148	5525396	3000	5525149;5525642;494
chr1	5530671	5533671	PE_000149	5532171	3000	5531833;5532508;676
chr1	5572631	5575631	PE_000150	5574131	3000	5573850;5574411;562
chr1	5576482	5579482	PE_000151	5577982	3000	5577717;5578246;530
chr1	5586074	5589074	PE_000152	5587574	3000	5587377;5587770;394
chr1	5595776	5598776	PE_000153	5597276	3000	5597165;5597387;223
chr1	5666764	5669764	PE_000154	5668264	3000	5667973;5668555;583
chr1	5710480	5713480	PE_000155	5711980	3000	5711788;5712172;385
chr1	6048183	6051183	PE_000156	6049683	3000	6049185;6050181;997
chr1	6049043	6052043	PE_000157	6050543	3000	6050472;6050613;142
chr1	6276816	6279816	PE_000158	6278316	3000	6277961;6278671;711
chr1	6277479	6280479	PE_000159	6278979	3000	6278715;6279243;529
chr1	6306677	6309677	PE_000160	6308177	3000	6307869;6308484;616
chr1	6307422	6310422	PE_000161	6308922	3000	6308522;6309321;800
chr1	6310036	6313036	PE_000162	6311536	3000	6311186;6311885;700
chr1	6354743	6357743	PE_000163	6356243	3000	6355904;6356581;678
chr1	6468704	6471704	PE_000164	6470204	3000	6470081;6470327;247
chr1	6569988	6572988	PE_000165	6571488	3000	6571419;6571556;138
chr1	6626339	6629339	PE_000166	6627839	3000	6627651;6628026;376
chr1	6668133	6671133	PE_000167	6669633	3000	6669392;6669873;482
chr1	6738830	6741830	PE_000168	6740330	3000	6740183;6740477;295
chr1	6936213	6939213	PE_000169	6937713	3000	6937544;6937881;338
chr1	6973345	6976345	PE_000170	6974845	3000	6974828;6974862;35
chr1	6999517	7002517	PE_000171	7001017	3000	7000905;7001128;224
chr1	7062886	7065886	PE_000172	7064386	3000	7064355;7064417;63
chr1	7063147	7066147	PE_000173	7064647	3000	7064609;7064685;77
chr1	7063794	7066794	PE_000174	7065294	3000	7065000;7065588;589
chr1	7148716	7151716	PE_000175	7150216	3000	7149536;7150896;1361
chr1	7162262	7165262	PE_000176	7163762	3000	7163647;7163876;230
chr1	7162803	7165803	PE_000177	7164303	3000	7164129;7164477;349
chr1	7191469	7194469	PE_000178	7192969	3000	7192794;7193144;351
chr1	7197906	7200906	PE_000179	7199406	3000	7199262;7199550;289
chr1	7219625	7222625	PE_000180	7221125	3000	7220991;7221259;269
chr1	7250344	7253344	PE_000181	7251844	3000	7251529;7252159;631
chr1	7257452	7260452	PE_000182	7258952	3000	7258813;7259091;279
chr1	7318028	7321028	PE_000183	7319528	3000	7319342;7319714;373
chr1	7318578	7321578	PE_000184	7320078	3000	7319784;7320372;589
chr1	7462629	7465629	PE_000185	7464129	3000	7464001;7464256;256
chr1	7499452	7502452	PE_000186	7500952	3000	7500826;7501077;252
chr1	7599278	7602278	PE_000187	7600778	3000	7600670;7600885;216
chr1	7756132	7759132	PE_000188	7757632	3000	7757551;7757713;163
chr1	7828914	7831914	PE_000189	7830414	3000	7830202;7830625;424
chr1	7871285	7874285	PE_000190	7872785	3000	7872466;7873104;639
chr1	7929136	7932136	PE_000191	7930636	3000	7930492;7930779;288
chr1	7964943	7967943	PE_000192	7966443	3000	7966390;7966496;107
chr1	8099656	8102656	PE_000193	8101156	3000	8101069;8101242;174
chr1	8196957	8199957	PE_000194	8198457	3000	8198080;8198833;754
chr1	8214418	8217418	PE_000195	8215918	3000	8215677;8216158;482
chr1	8323035	8326035	PE_000196	8324535	3000	8324441;8324629;189
chr1	8413431	8416431	PE_000197	8414931	3000	8414811;8415051;241
chr1	8521640	8524640	PE_000198	8523140	3000	8522936;8523343;408
chr1	8598836	8601836	PE_000199	8600336	3000	8600119;8600552;434
chr1	8718460	8721460	PE_000200	8719960	3000	8719704;8720216;513
chr1	8895666	8898666	PE_000201	8897166	3000	8896911;8897421;511
chr1	8947543	8950543	PE_000202	8949043	3000	8948996;8949090;95
chr1	8953266	8956266	PE_000203	8954766	3000	8954618;8954913;296
chr1	9058042	9061042	PE_000204	9059542	3000	9059512;9059571;60
chr1	9105950	9108950	PE_000205	9107450	3000	9107271;9107628;358
chr1	9142061	9145061	PE_000206	9143561	3000	9143266;9143856;591
chr1	9189853	9192853	PE_000207	9191353	3000	9191020;9191685;666
chr1	9297075	9300075	PE_000208	9298575	3000	9298389;9298760;372
chr1	9299325	9302325	PE_000209	9300825	3000	9300743;9300906;164
chr1	9343920	9346920	PE_000210	9345420	3000	9345171;9345668;498
chr1	9432798	9435798	PE_000211	9434298	3000	9434030;9434566;537
chr1	9444942	9447942	PE_000212	9446442	3000	9446094;9446789;696
chr1	9564480	9567480	PE_000213	9565980	3000	9565815;9566145;331
chr1	9570566	9573566	PE_000214	9572066	3000	9571865;9572266;402
chr1	9670038	9673038	PE_000215	9671538	3000	9671384;9671691;308
chr1	9670454	9673454	PE_000216	9671954	3000	9671866;9672041;176
chr1	9671865	9674865	PE_000217	9673365	3000	9673310;9673419;110
chr1	9713755	9716755	PE_000218	9715255	3000	9715037;9715473;437
chr1	9965162	9968162	PE_000219	9966662	3000	9966327;9966996;670
chr1	10265738	10268738	PE_000220	10267238	3000	10267025;10267451;427
chr1	10266251	10269251	PE_000221	10267751	3000	10267566;10267936;371
chr1	10266841	10269841	PE_000222	10268341	3000	10268238;10268444;207
chr1	10435986	10438986	PE_000223	10437486	3000	10437283;10437689;407
chr1	10454950	10457950	PE_000224	10456450	3000	10456192;10456708;517
chr1	10515145	10518145	PE_000225	10516645	3000	10516251;10517038;788
chr1	10681695	10684695	PE_000226	10683195	3000	10683035;10683355;321
chr1	10755290	10758290	PE_000227	10756790	3000	10756537;10757043;507
chr1	10791165	10794165	PE_000228	10792665	3000	10792490;10792840;351
chr1	10805147	10808147	PE_000229	10806647	3000	10806200;10807093;894
chr1	10822541	10825541	PE_000230	10824041	3000	10823932;10824150;219
chr1	10825623	10828623	PE_000231	10827123	3000	10826804;10827441;638
chr1	10849372	10852372	PE_000232	10850872	3000	10850657;10851086;430
chr1	10875110	10878110	PE_000233	10876610	3000	10876364;10876856;493
chr1	10888721	10891721	PE_000234	10890221	3000	10889945;10890496;552
chr1	10889214	10892214	PE_000235	10890714	3000	10890645;10890782;138
chr1	10889446	10892446	PE_000236	10890946	3000	10890871;10891021;151
chr1	11145833	11148833	PE_000237	11147333	3000	11147157;11147509;353
chr1	11184045	11187045	PE_000238	11185545	3000	11185438;11185652;215
chr1	11189264	11192264	PE_000239	11190764	3000	11190500;11191028;529
chr1	11372631	11375631	PE_000240	11374131	3000	11373233;11375028;1796
chr1	11376363	11379363	PE_000241	11377863	3000	11377636;11378090;455
chr1	11425522	11428522	PE_000242	11427022	3000	11426791;11427253;463
chr1	11426019	11429019	PE_000243	11427519	3000	11427373;11427664;292
chr1	11481228	11484228	PE_000244	11482728	3000	11482606;11482850;245
chr1	11599832	11602832	PE_000245	11601332	3000	11601080;11601584;505
chr1	11614418	11617418	PE_000246	11615918	3000	11615844;11615991;148
chr1	11614598	11617598	PE_000247	11616098	3000	11616086;11616109;24
chr1	11614900	11617900	PE_000248	11616400	3000	11616242;11616558;317
chr1	11697409	11700409	PE_000249	11698909	3000	11698785;11699033;249
chr1	11841895	11844895	PE_000250	11843395	3000	11843155;11843635;481
chr1	11977389	11980389	PE_000251	11978889	3000	11978280;11979497;1218
chr1	12199356	12202356	PE_000252	12200856	3000	12200754;12200958;205
chr1	12419568	12422568	PE_000253	12421068	3000	12420970;12421165;196
chr1	12434293	12437293	PE_000254	12435793	3000	12435567;12436018;452
chr1	13088312	13091312	PE_000255	13089812	3000	13089716;13089908;193
chr1	13542412	13545412	PE_000256	13543912	3000	13543725;13544098;374
chr1	13558029	13561029	PE_000257	13559529	3000	13559119;13559939;821
chr1	14025672	14028672	PE_000258	14027172	3000	14026912;14027431;520
chr1	15893725	15896725	PE_000259	15895225	3000	15895127;15895323;197
chr1	16422851	16425851	PE_000260	16424351	3000	16424198;16424503;306
chr1	16428788	16431788	PE_000261	16430288	3000	16430050;16430525;476
chr1	16620463	16623463	PE_000262	16621963	3000	16621799;16622126;328
chr1	16968669	16971669	PE_000263	16970169	3000	16969977;16970361;385
chr1	16977097	16980097	PE_000264	16978597	3000	16978574;16978620;47
chr1	17163433	17166433	PE_000265	17164933	3000	17164700;17165165;466
chr1	17231554	17234554	PE_000266	17233054	3000	17232997;17233110;114
chr1	17231920	17234920	PE_000267	17233420	3000	17233264;17233576;313
chr1	17472012	17475012	PE_000268	17473512	3000	17473410;17473613;204
chr1	17725387	17728387	PE_000269	17726887	3000	17726783;17726991;209
chr1	17730372	17733372	PE_000270	17731872	3000	17731542;17732202;661
chr1	17807308	17810308	PE_000271	17808808	3000	17808571;17809045;475
chr1	17871652	17874652	PE_000272	17873152	3000	17872814;17873490;677
chr1	18024631	18027631	PE_000273	18026131	3000	18025960;18026302;343
chr1	18034860	18037860	PE_000274	18036360	3000	18036288;18036432;145
chr1	18216662	18219662	PE_000275	18218162	3000	18218097;18218226;130
chr1	18217269	18220269	PE_000276	18218769	3000	18218637;18218901;265
chr1	18263326	18266326	PE_000277	18264826	3000	18264499;18265152;654
chr1	18265551	18268551	PE_000278	18267051	3000	18266908;18267194;287
chr1	18265921	18268921	PE_000279	18267421	3000	18267259;18267583;325
chr1	18418647	18421647	PE_000280	18420147	3000	18419934;18420359;426
chr1	18458565	18461565	PE_000281	18460065	3000	18459902;18460227;326
chr1	18472450	18475450	PE_000282	18473950	3000	18473788;18474111;324
chr1	18476994	18479994	PE_000283	18478494	3000	18478366;18478622;257
chr1	18477377	18480377	PE_000284	18478877	3000	18478672;18479081;410
chr1	18482977	18485977	PE_000285	18484477	3000	18484311;18484642;332
chr1	18492753	18495753	PE_000286	18494253	3000	18494134;18494372;239
chr1	18495745	18498745	PE_000287	18497245	3000	18497097;18497392;296
chr1	18666502	18669502	PE_000288	18668002	3000	18667887;18668116;230
chr1	18820528	18823528	PE_000289	18822028	3000	18821966;18822089;124
chr1	18871859	18874859	PE_000290	18873359	3000	18872999;18873719;721
chr1	18950602	18953602	PE_000291	18952102	3000	18951863;18952340;478
chr1	19108231	19111231	PE_000292	19109731	3000	19109471;19109990;520
chr1	19111127	19114127	PE_000293	19112627	3000	19112575;19112679;105
chr1	19111475	19114475	PE_000294	19112975	3000	19112760;19113190;431
chr1	19138563	19141563	PE_000295	19140063	3000	19139841;19140285;445
chr1	19195916	19198916	PE_000296	19197416	3000	19197282;19197549;268
chr1	19408052	19411052	PE_000297	19409552	3000	19409436;19409668;233
chr1	19526233	19529233	PE_000298	19527733	3000	19527473;19527993;521
chr1	19529351	19532351	PE_000299	19530851	3000	19530816;19530885;70
chr1	19534610	19537610	PE_000300	19536110	3000	19535990;19536230;241
chr1	19539775	19542775	PE_000301	19541275	3000	19541195;19541354;160
chr1	19545049	19548049	PE_000302	19546549	3000	19546285;19546813;529
chr1	19647960	19650960	PE_000303	19649460	3000	19649365;19649554;190
chr1	19758242	19761242	PE_000304	19759742	3000	19759526;19759958;433
chr1	19785361	19788361	PE_000305	19786861	3000	19786821;19786900;80
chr1	19797652	19800652	PE_000306	19799152	3000	19798956;19799347;392
chr1	19846352	19849352	PE_000307	19847852	3000	19847687;19848016;330
chr1	19882042	19885042	PE_000308	19883542	3000	19882972;19884111;1140
chr1	19882861	19885861	PE_000309	19884361	3000	19884269;19884452;184
chr1	19960701	19963701	PE_000310	19962201	3000	19962148;19962254;107
chr1	20057991	20060991	PE_000311	20059491	3000	20059445;20059537;93
chr1	20058878	20061878	PE_000312	20060378	3000	20059788;20060968;1181
chr1	20064355	20067355	PE_000313	20065855	3000	20065805;20065905;101
chr1	20193651	20196651	PE_000314	20195151	3000	20194770;20195532;763
chr1	20202999	20205999	PE_000315	20204499	3000	20203997;20205000;1004
chr1	20219484	20222484	PE_000316	20220984	3000	20220847;20221121;275
chr1	20248874	20251874	PE_000317	20250374	3000	20250160;20250587;428
chr1	20251129	20254129	PE_000318	20252629	3000	20252434;20252824;391
chr1	20260822	20263822	PE_000319	20262322	3000	20262046;20262597;552
chr1	20540381	20543381	PE_000320	20541881	3000	20541725;20542037;313
chr1	20541078	20544078	PE_000321	20542578	3000	20542534;20542622;89
chr1	20547188	20550188	PE_000322	20548688	3000	20548552;20548824;273
chr1	20638280	20641280	PE_000323	20639780	3000	20639746;20639813;68
chr1	20702375	20705375	PE_000324	20703875	3000	20703769;20703981;213
chr1	20743805	20746805	PE_000325	20745305	3000	20745113;20745497;385
chr1	20779753	20782753	PE_000326	20781253	3000	20781165;20781341;177
chr1	20834014	20837014	PE_000327	20835514	3000	20835392;20835636;245
chr1	20915591	20918591	PE_000328	20917091	3000	20916879;20917303;425
chr1	20937094	20940094	PE_000329	20938594	3000	20938415;20938773;359
chr1	20944946	20947946	PE_000330	20946446	3000	20946427;20946465;39
chr1	20945088	20948088	PE_000331	20946588	3000	20946571;20946604;34
chr1	20974785	20977785	PE_000332	20976285	3000	20976041;20976528;488
chr1	20976223	20979223	PE_000333	20977723	3000	20977685;20977760;76
chr1	20985679	20988679	PE_000334	20987179	3000	20986773;20987585;813
chr1	21148225	21151225	PE_000335	21149725	3000	21149612;21149837;226
chr1	21252230	21255230	PE_000336	21253730	3000	21253549;21253910;362
chr1	21254604	21257604	PE_000337	21256104	3000	21255788;21256419;632
chr1	21360423	21363423	PE_000338	21361923	3000	21361885;21361961;77
chr1	21516803	21519803	PE_000339	21518303	3000	21518055;21518550;496
chr1	21556516	21559516	PE_000340	21558016	3000	21557925;21558106;182
chr1	21576870	21579870	PE_000341	21578370	3000	21578352;21578388;37
chr1	21660978	21663978	PE_000342	21662478	3000	21662351;21662605;255
chr1	21864506	21867506	PE_000343	21866006	3000	21865969;21866043;75
chr1	21922458	21925458	PE_000344	21923958	3000	21923750;21924166;417
chr1	21927850	21930850	PE_000345	21929350	3000	21929147;21929553;407
chr1	22279088	22282088	PE_000346	22280588	3000	22280451;22280725;275
chr1	22282057	22285057	PE_000347	22283557	3000	22283483;22283631;149
chr1	22322920	22325920	PE_000348	22324420	3000	22324060;22324779;720
chr1	22335597	22338597	PE_000349	22337097	3000	22336856;22337338;483
chr1	22426692	22429692	PE_000350	22428192	3000	22427978;22428406;429
chr1	22437349	22440349	PE_000351	22438849	3000	22438741;22438957;217
chr1	22459937	22462937	PE_000352	22461437	3000	22460927;22461946;1020
chr1	22484607	22487607	PE_000353	22486107	3000	22486029;22486185;157
chr1	22484789	22487789	PE_000354	22486289	3000	22486220;22486358;139
chr1	22543510	22546510	PE_000355	22545010	3000	22544999;22545020;22
chr1	22570507	22573507	PE_000356	22572007	3000	22571763;22572251;489
chr1	22643830	22646830	PE_000357	22645330	3000	22645183;22645476;294
chr1	22644317	22647317	PE_000358	22645817	3000	22645719;22645914;196
chr1	22656341	22659341	PE_000359	22657841	3000	22657791;22657891;101
chr1	22662286	22665286	PE_000360	22663786	3000	22663652;22663920;269
chr1	22662933	22665933	PE_000361	22664433	3000	22664198;22664667;470
chr1	22671573	22674573	PE_000362	22673073	3000	22672807;22673339;533
chr1	22880362	22883362	PE_000363	22881862	3000	22881594;22882129;536
chr1	22880963	22883963	PE_000364	22882463	3000	22882382;22882544;163
chr1	22953712	22956712	PE_000365	22955212	3000	22955185;22955239;55
chr1	22998471	23001471	PE_000366	22999971	3000	22999738;23000204;467
chr1	23103994	23106994	PE_000367	23105494	3000	23104955;23106032;1078
chr1	23127004	23130004	PE_000368	23128504	3000	23128443;23128564;122
chr1	23127243	23130243	PE_000369	23128743	3000	23128726;23128759;34
chr1	23127511	23130511	PE_000370	23129011	3000	23128884;23129137;254
chr1	23346104	23349104	PE_000371	23347604	3000	23347464;23347743;280
chr1	23346519	23349519	PE_000372	23348019	3000	23347962;23348076;115
chr1	23422402	23425402	PE_000373	23423902	3000	23423740;23424063;324
chr1	23425784	23428784	PE_000374	23427284	3000	23427230;23427337;108
chr1	23454330	23457330	PE_000375	23455830	3000	23455623;23456037;415
chr1	23454716	23457716	PE_000376	23456216	3000	23456174;23456258;85
chr1	23542823	23545823	PE_000377	23544323	3000	23544033;23544613;581
chr1	23557681	23560681	PE_000378	23559181	3000	23558835;23559527;693
chr1	23561713	23564713	PE_000379	23563213	3000	23563141;23563284;144
chr1	23743960	23746960	PE_000380	23745460	3000	23745325;23745594;270
chr1	23802226	23805226	PE_000381	23803726	3000	23803527;23803924;398
chr1	23838999	23841999	PE_000382	23840499	3000	23840327;23840670;344
chr1	23842742	23845742	PE_000383	23844242	3000	23844089;23844394;306
chr1	23843292	23846292	PE_000384	23844792	3000	23844597;23844987;391
chr1	23845823	23848823	PE_000385	23847323	3000	23847153;23847492;340
chr1	23849045	23852045	PE_000386	23850545	3000	23850355;23850735;381
chr1	23869372	23872372	PE_000387	23870872	3000	23870667;23871077;411
chr1	24015003	24018003	PE_000388	24016503	3000	24016336;24016670;335
chr1	24194794	24197794	PE_000389	24196294	3000	24195906;24196682;777
chr1	24414041	24417041	PE_000390	24415541	3000	24415515;24415566;52
chr1	24491538	24494538	PE_000391	24493038	3000	24492992;24493084;93
chr1	24540419	24543419	PE_000392	24541919	3000	24541835;24542003;169
chr1	24540777	24543777	PE_000393	24542277	3000	24542097;24542457;361
chr1	24585346	24588346	PE_000394	24586846	3000	24586696;24586996;301
chr1	24585622	24588622	PE_000395	24587122	3000	24587098;24587145;48
chr1	24587793	24590793	PE_000396	24589293	3000	24589171;24589415;245
chr1	24633112	24636112	PE_000397	24634612	3000	24634291;24634933;643
chr1	24779862	24782862	PE_000398	24781362	3000	24781107;24781616;510
chr1	24824957	24827957	PE_000399	24826457	3000	24826356;24826558;203
chr1	24846456	24849456	PE_000400	24847956	3000	24847619;24848292;674
chr1	25078919	25081919	PE_000401	25080419	3000	25080393;25080444;52
chr1	25094248	25097248	PE_000402	25095748	3000	25095461;25096034;574
chr1	25127846	25130846	PE_000403	25129346	3000	25128905;25129787;883
chr1	25139331	25142331	PE_000404	25140831	3000	25140700;25140962;263
chr1	25325589	25328589	PE_000405	25327089	3000	25327014;25327163;150
chr1	25336229	25339229	PE_000406	25337729	3000	25337597;25337860;264
chr1	25336636	25339636	PE_000407	25338136	3000	25337916;25338355;440
chr1	25342958	25345958	PE_000408	25344458	3000	25344258;25344658;401
chr1	25377631	25380631	PE_000409	25379131	3000	25378893;25379368;476
chr1	25384644	25387644	PE_000410	25386144	3000	25385839;25386448;610
chr1	25411006	25414006	PE_000411	25412506	3000	25412321;25412691;371
chr1	25428294	25431294	PE_000412	25429794	3000	25429605;25429983;379
chr1	25440781	25443781	PE_000413	25442281	3000	25442163;25442398;236
chr1	25472497	25475497	PE_000414	25473997	3000	25473902;25474092;191
chr1	25806217	25809217	PE_000415	25807717	3000	25807686;25807747;62
chr1	25807572	25810572	PE_000416	25809072	3000	25808942;25809201;260
chr1	25827492	25830492	PE_000417	25828992	3000	25828802;25829181;380
chr1	25828081	25831081	PE_000418	25829581	3000	25829485;25829677;193
chr1	25829080	25832080	PE_000419	25830580	3000	25830494;25830666;173
chr1	25829808	25832808	PE_000420	25831308	3000	25831190;25831425;236
chr1	25886380	25889380	PE_000421	25887880	3000	25887664;25888096;433
chr1	25890342	25893342	PE_000422	25891842	3000	25891656;25892027;372
chr1	25924737	25927737	PE_000423	25926237	3000	25926121;25926353;233
chr1	25962934	25965934	PE_000424	25964434	3000	25964298;25964569;272
chr1	26085332	26088332	PE_000425	26086832	3000	26086704;26086960;257
chr1	26098428	26101428	PE_000426	26099928	3000	26099894;26099962;69
chr1	26108907	26111907	PE_000427	26110407	3000	26110183;26110631;449
chr1	26131581	26134581	PE_000428	26133081	3000	26132872;26133290;419
chr1	26191839	26194839	PE_000429	26193339	3000	26193115;26193562;448
chr1	26247502	26250502	PE_000430	26249002	3000	26248880;26249123;244
chr1	26295007	26298007	PE_000431	26296507	3000	26296284;26296729;446
chr1	26344614	26347614	PE_000432	26346114	3000	26345932;26346295;364
chr1	26420768	26423768	PE_000433	26422268	3000	26422255;26422280;26
chr1	26420881	26423881	PE_000434	26422381	3000	26422361;26422401;41
chr1	26421181	26424181	PE_000435	26422681	3000	26422444;26422918;475
chr1	26476017	26479017	PE_000436	26477517	3000	26477148;26477885;738
chr1	26543733	26546733	PE_000437	26545233	3000	26545098;26545367;270
chr1	26550751	26553751	PE_000438	26552251	3000	26552168;26552333;166
chr1	26568687	26571687	PE_000439	26570187	3000	26569833;26570540;708
chr1	26571267	26574267	PE_000440	26572767	3000	26572653;26572880;228
chr1	26614593	26617593	PE_000441	26616093	3000	26615838;26616347;510
chr1	26788959	26791959	PE_000442	26790459	3000	26790090;26790827;738
chr1	26836910	26839910	PE_000443	26838410	3000	26838351;26838469;119
chr1	26859608	26862608	PE_000444	26861108	3000	26861065;26861151;87
chr1	26898201	26901201	PE_000445	26899701	3000	26899353;26900049;697
chr1	26911002	26914002	PE_000446	26912502	3000	26912268;26912735;468
chr1	26911565	26914565	PE_000447	26913065	3000	26913042;26913087;46
chr1	26941545	26944545	PE_000448	26943045	3000	26942860;26943229;370
chr1	26987728	26990728	PE_000449	26989228	3000	26989083;26989372;290
chr1	27000788	27003788	PE_000450	27002288	3000	27002148;27002427;280
chr1	27115923	27118923	PE_000451	27117423	3000	27117293;27117553;261
chr1	27125880	27128880	PE_000452	27127380	3000	27126616;27128144;1529
chr1	27130350	27133350	PE_000453	27131850	3000	27131465;27132234;770
chr1	27215581	27218581	PE_000454	27217081	3000	27216810;27217352;543
chr1	27322849	27325849	PE_000455	27324349	3000	27324305;27324393;89
chr1	27352238	27355238	PE_000456	27353738	3000	27353542;27353933;392
chr1	27403339	27406339	PE_000457	27404839	3000	27404636;27405042;407
chr1	27526400	27529400	PE_000458	27527900	3000	27527623;27528176;554
chr1	27528523	27531523	PE_000459	27530023	3000	27529855;27530191;337
chr1	27570795	27573795	PE_000460	27572295	3000	27571638;27572952;1315
chr1	27654075	27657075	PE_000461	27655575	3000	27655335;27655815;481
chr1	27672192	27675192	PE_000462	27673692	3000	27673618;27673765;148
chr1	27686701	27689701	PE_000463	27688201	3000	27688065;27688337;273
chr1	27718348	27721348	PE_000464	27719848	3000	27719637;27720059;423
chr1	27728449	27731449	PE_000465	27729949	3000	27729849;27730049;201
chr1	27730713	27733713	PE_000466	27732213	3000	27732204;27732222;19
chr1	27731101	27734101	PE_000467	27732601	3000	27732373;27732829;457
chr1	27837633	27840633	PE_000468	27839133	3000	27839089;27839177;89
chr1	27882485	27885485	PE_000469	27883985	3000	27883817;27884153;337
chr1	27915743	27918743	PE_000470	27917243	3000	27917061;27917424;364
chr1	28014773	28017773	PE_000471	28016273	3000	28016197;28016348;152
chr1	28097142	28100142	PE_000472	28098642	3000	28098366;28098918;553
chr1	28125353	28128353	PE_000473	28126853	3000	28126657;28127048;392
chr1	28227206	28230206	PE_000474	28228706	3000	28228663;28228749;87
chr1	28413141	28416141	PE_000475	28414641	3000	28414518;28414763;246
chr1	28535562	28538562	PE_000476	28537062	3000	28536933;28537191;259
chr1	28641766	28644766	PE_000477	28643266	3000	28643165;28643366;202
chr1	28721070	28724070	PE_000478	28722570	3000	28722315;28722824;510
chr1	28811712	28814712	PE_000479	28813212	3000	28812937;28813487;551
chr1	28814623	28817623	PE_000480	28816123	3000	28815999;28816246;248
chr1	28829402	28832402	PE_000481	28830902	3000	28830619;28831184;566
chr1	28946135	28949135	PE_000482	28947635	3000	28947050;28948219;1170
chr1	28986199	28989199	PE_000483	28987699	3000	28987439;28987959;521
chr1	29009660	29012660	PE_000484	29011160	3000	29011093;29011226;134
chr1	29054832	29057832	PE_000485	29056332	3000	29055994;29056670;677
chr1	29212655	29215655	PE_000486	29214155	3000	29213968;29214342;375
chr1	29269224	29272224	PE_000487	29270724	3000	29270477;29270970;494
chr1	29274243	29277243	PE_000488	29275743	3000	29275181;29276304;1124
chr1	29280494	29283494	PE_000489	29281994	3000	29281764;29282224;461
chr1	29357241	29360241	PE_000490	29358741	3000	29358454;29359028;575
chr1	29603785	29606785	PE_000491	29605285	3000	29605070;29605500;431
chr1	29686653	29689653	PE_000492	29688153	3000	29688013;29688292;280
chr1	29802831	29805831	PE_000493	29804331	3000	29803915;29804746;832
chr1	29817352	29820352	PE_000494	29818852	3000	29818700;29819003;304
chr1	29817713	29820713	PE_000495	29819213	3000	29819094;29819331;238
chr1	29904957	29907957	PE_000496	29906457	3000	29906096;29906817;722
chr1	29947061	29950061	PE_000497	29948561	3000	29948545;29948576;32
chr1	29947872	29950872	PE_000498	29949372	3000	29948954;29949790;837
chr1	29948389	29951389	PE_000499	29949889	3000	29949835;29949942;108
chr1	29961120	29964120	PE_000500	29962620	3000	29962451;29962788;338
chr1	29970433	29973433	PE_000501	29971933	3000	29971525;29972341;817
chr1	30026154	30029154	PE_000502	30027654	3000	30026966;30028341;1376
chr1	30052628	30055628	PE_000503	30054128	3000	30053378;30054878;1501
chr1	30098565	30101565	PE_000504	30100065	3000	30099984;30100145;162
chr1	30098894	30101894	PE_000505	30100394	3000	30100198;30100590;393
chr1	30288793	30291793	PE_000506	30290293	3000	30290168;30290417;250
chr1	30291020	30294020	PE_000507	30292520	3000	30292372;30292667;296
chr1	30291467	30294467	PE_000508	30292967	3000	30292723;30293210;488
chr1	30318812	30321812	PE_000509	30320312	3000	30320202;30320421;220
chr1	30319182	30322182	PE_000510	30320682	3000	30320508;30320856;349
chr1	30327454	30330454	PE_000511	30328954	3000	30328795;30329113;319
chr1	30340534	30343534	PE_000512	30342034	3000	30341852;30342215;364
chr1	30345226	30348226	PE_000513	30346726	3000	30346689;30346763;75
chr1	30361836	30364836	PE_000514	30363336	3000	30363023;30363648;626
chr1	30367762	30370762	PE_000515	30369262	3000	30369206;30369317;112
chr1	30368331	30371331	PE_000516	30369831	3000	30369777;30369885;109
chr2	125268	128268	PE_000517	126768	3000	126528;127008;481
chr2	143368	146368	PE_000518	144868	3000	144638;145097;460
chr2	143847	146847	PE_000519	145347	3000	145141;145552;412
chr2	152647	155647	PE_000520	154147	3000	153988;154306;319
chr2	270940	273940	PE_000521	272440	3000	272038;272842;805
chr2	498324	501324	PE_000522	499824	3000	499694;499953;260
chr2	594462	597462	PE_000523	595962	3000	595864;596059;196
chr2	653832	656832	PE_000524	655332	3000	655195;655468;274
chr2	779093	782093	PE_000525	780593	3000	780409;780776;368
chr2	845344	848344	PE_000526	846844	3000	846702;846986;285
chr2	850814	853814	PE_000527	852314	3000	852231;852396;166
chr2	907467	910467	PE_000528	908967	3000	908686;909248;563
chr2	933233	936233	PE_000529	934733	3000	934574;934891;318
chr2	1182357	1185357	PE_000530	1183857	3000	1183699;1184015;317
chr2	1377664	1380664	PE_000531	1379164	3000	1379067;1379261;195
chr2	1609064	1612064	PE_000532	1610564	3000	1610478;1610650;173
chr2	1918808	1921808	PE_000533	1920308	3000	1920168;1920447;280
chr2	1929376	1932376	PE_000534	1930876	3000	1930743;1931008;266
chr2	2144992	2147992	PE_000535	2146492	3000	2146454;2146530;77
chr2	2179268	2182268	PE_000536	2180768	3000	2180420;2181115;696
chr2	2179825	2182825	PE_000537	2181325	3000	2181276;2181374;99
chr2	2973358	2976358	PE_000538	2974858	3000	2974609;2975107;499
chr2	2978517	2981517	PE_000539	2980017	3000	2979894;2980139;246
chr2	3526016	3529016	PE_000540	3527516	3000	3527376;3527655;280
chr2	5542842	5545842	PE_000541	5544342	3000	5544269;5544414;146
chr2	5674484	5677484	PE_000542	5675984	3000	5675745;5676222;478
chr2	6355647	6358647	PE_000543	6357147	3000	6356909;6357385;477
chr2	6369640	6372640	PE_000544	6371140	3000	6371048;6371232;185
chr2	6711361	6714361	PE_000545	6712861	3000	6712707;6713014;308
chr2	7037613	7040613	PE_000546	7039113	3000	7038785;7039441;657
chr2	7043238	7046238	PE_000547	7044738	3000	7044535;7044940;406
chr2	7080064	7083064	PE_000548	7081564	3000	7081473;7081654;182
chr2	7131412	7134412	PE_000549	7132912	3000	7132786;7133037;252
chr2	7163949	7166949	PE_000550	7165449	3000	7165203;7165694;492
chr2	7180811	7183811	PE_000551	7182311	3000	7182064;7182557;494
chr2	7394621	7397621	PE_000552	7396121	3000	7396062;7396180;119
chr2	7469261	7472261	PE_000553	7470761	3000	7470716;7470806;91
chr2	7469918	7472918	PE_000554	7471418	3000	7470967;7471869;903
chr2	7503175	7506175	PE_000555	7504675	3000	7504508;7504841;334
chr2	7509937	7512937	PE_000556	7511437	3000	7511421;7511453;33
chr2	7511593	7514593	PE_000557	7513093	3000	7512882;7513303;422
chr2	7601888	7604888	PE_000558	7603388	3000	7602914;7603862;949
chr2	7610456	7613456	PE_000559	7611956	3000	7611937;7611975;39
chr2	7627588	7630588	PE_000560	7629088	3000	7629024;7629151;128
chr2	7741210	7744210	PE_000561	7742710	3000	7742450;7742970;521
chr2	7827342	7830342	PE_000562	7828842	3000	7828673;7829010;338
chr2	7829870	7832870	PE_000563	7831370	3000	7830939;7831800;862
chr2	7866292	7869292	PE_000564	7867792	3000	7867677;7867906;230
chr2	7866662	7869662	PE_000565	7868162	3000	7868068;7868255;188
chr2	7873481	7876481	PE_000566	7874981	3000	7874862;7875100;239
chr2	7942392	7945392	PE_000567	7943892	3000	7943686;7944097;412
chr2	7964088	7967088	PE_000568	7965588	3000	7965412;7965764;353
chr2	8110744	8113744	PE_000569	8112244	3000	8112045;8112443;399
chr2	8142438	8145438	PE_000570	8143938	3000	8143902;8143973;72
chr2	8142634	8145634	PE_000571	8144134	3000	8144062;8144205;144
chr2	8177682	8180682	PE_000572	8179182	3000	8179015;8179348;334
chr2	8193899	8196899	PE_000573	8195399	3000	8195368;8195429;62
chr2	8385363	8388363	PE_000574	8386863	3000	8386573;8387152;580
chr2	8387370	8390370	PE_000575	8388870	3000	8388718;8389022;305
chr2	8392790	8395790	PE_000576	8394290	3000	8394265;8394314;50
chr2	8594074	8597074	PE_000577	8595574	3000	8595545;8595602;58
chr2	8594228	8597228	PE_000578	8595728	3000	8595656;8595799;144
chr2	8605636	8608636	PE_000579	8607136	3000	8606962;8607310;349
chr2	8688878	8691878	PE_000580	8690378	3000	8690237;8690518;282
chr2	8693762	8696762	PE_000581	8695262	3000	8694976;8695547;572
chr2	8809299	8812299	PE_000582	8810799	3000	8810705;8810893;189
chr2	8838048	8841048	PE_000583	8839548	3000	8838665;8840430;1766
chr2	8984216	8987216	PE_000584	8985716	3000	8985395;8986036;642
chr2	9135102	9138102	PE_000585	9136602	3000	9136572;9136631;60
chr2	9206297	9209297	PE_000586	9207797	3000	9207753;9207840;88
chr2	9291628	9294628	PE_000587	9293128	3000	9292728;9293527;800
chr2	9292197	9295197	PE_000588	9293697	3000	9293634;9293760;127
chr2	9296585	9299585	PE_000589	9298085	3000	9297949;9298221;273
chr2	9302019	9305019	PE_000590	9303519	3000	9303210;9303828;619
chr2	9313669	9316669	PE_000591	9315169	3000	9314996;9315341;346
chr2	9464493	9467493	PE_000592	9465993	3000	9465504;9466482;979
chr2	9543290	9546290	PE_000593	9544790	3000	9544737;9544842;106
chr2	9552393	9555393	PE_000594	9553893	3000	9553804;9553982;179
chr2	9582116	9585116	PE_000595	9583616	3000	9583546;9583686;141
chr2	9597742	9600742	PE_000596	9599242	3000	9598987;9599496;510
chr2	9629620	9632620	PE_000597	9631120	3000	9631082;9631157;76
chr2	9630111	9633111	PE_000598	9631611	3000	9631172;9632050;879
chr2	9806310	9809310	PE_000599	9807810	3000	9807729;9807890;162
chr2	9822251	9825251	PE_000600	9823751	3000	9823557;9823945;389
chr2	9947304	9950304	PE_000601	9948804	3000	9948643;9948965;323
chr2	10028966	10031966	PE_000602	10030466	3000	10030151;10030780;630
chr2	10272325	10275325	PE_000603	10273825	3000	10273777;10273873;97
chr2	10372096	10375096	PE_000604	10373596	3000	10373308;10373883;576
chr2	10399239	10402239	PE_000605	10400739	3000	10400498;10400980;483
chr2	10488975	10491975	PE_000606	10490475	3000	10490194;10490756;563
chr2	10495525	10498525	PE_000607	10497025	3000	10496654;10497396;743
chr2	10503515	10506515	PE_000608	10505015	3000	10504937;10505093;157
chr2	10615592	10618592	PE_000609	10617092	3000	10616894;10617290;397
chr2	10627534	10630534	PE_000610	10629034	3000	10628931;10629136;206
chr2	10775742	10778742	PE_000611	10777242	3000	10777173;10777310;138
chr2	10823728	10826728	PE_000612	10825228	3000	10824881;10825574;694
chr2	10841375	10844375	PE_000613	10842875	3000	10842739;10843010;272
chr2	10868748	10871748	PE_000614	10870248	3000	10870214;10870282;69
chr2	10879146	10882146	PE_000615	10880646	3000	10880507;10880784;278
chr2	10889017	10892017	PE_000616	10890517	3000	10890403;10890631;229
chr2	10892932	10895932	PE_000617	10894432	3000	10894324;10894539;216
chr2	11023633	11026633	PE_000618	11025133	3000	11025054;11025211;158
chr2	11070961	11073961	PE_000619	11072461	3000	11072367;11072555;189
chr2	11141896	11144896	PE_000620	11143396	3000	11143373;11143419;47
chr2	11157931	11160931	PE_000621	11159431	3000	11159292;11159569;278
chr2	11300798	11303798	PE_000622	11302298	3000	11302221;11302375;155
chr2	11422489	11425489	PE_000623	11423989	3000	11423875;11424103;229
chr2	11429872	11432872	PE_000624	11431372	3000	11431338;11431405;68
chr2	11431272	11434272	PE_000625	11432772	3000	11432581;11432962;382
chr2	11432197	11435197	PE_000626	11433697	3000	11433605;11433788;184
chr2	11434794	11437794	PE_000627	11436294	3000	11436180;11436408;229
chr2	11460347	11463347	PE_000628	11461847	3000	11461765;11461929;165
chr2	11508112	11511112	PE_000629	11509612	3000	11509525;11509699;175
chr2	11508402	11511402	PE_000630	11509902	3000	11509873;11509931;59
chr2	11618954	11621954	PE_000631	11620454	3000	11620304;11620603;300
chr2	11619400	11622400	PE_000632	11620900	3000	11620689;11621111;423
chr2	11652375	11655375	PE_000633	11653875	3000	11653711;11654039;329
chr2	11698808	11701808	PE_000634	11700308	3000	11700280;11700336;57
chr2	11790613	11793613	PE_000635	11792113	3000	11791992;11792233;242
chr2	11791046	11794046	PE_000636	11792546	3000	11792334;11792758;425
chr2	11897628	11900628	PE_000637	11899128	3000	11899046;11899210;165
chr2	11911940	11914940	PE_000638	11913440	3000	11913231;11913648;418
chr2	12001152	12004152	PE_000639	12002652	3000	12002176;12003128;953
chr2	12041795	12044795	PE_000640	12043295	3000	12043259;12043330;72
chr2	12098041	12101041	PE_000641	12099541	3000	12099488;12099593;106
chr2	12138147	12141147	PE_000642	12139647	3000	12139492;12139802;311
chr2	12222731	12225731	PE_000643	12224231	3000	12223895;12224566;672
chr2	12237715	12240715	PE_000644	12239215	3000	12239062;12239368;307
chr2	12298512	12301512	PE_000645	12300012	3000	12299970;12300053;84
chr2	12483269	12486269	PE_000646	12484769	3000	12484504;12485034;531
chr2	12608519	12611519	PE_000647	12610019	3000	12609815;12610223;409
chr2	12611012	12614012	PE_000648	12612512	3000	12612307;12612716;410
chr2	12687304	12690304	PE_000649	12688804	3000	12688531;12689077;547
chr2	12687805	12690805	PE_000650	12689305	3000	12689175;12689435;261
chr2	12700897	12703897	PE_000651	12702397	3000	12702176;12702617;442
chr2	12711192	12714192	PE_000652	12712692	3000	12712255;12713128;874
chr2	12742547	12745547	PE_000653	12744047	3000	12743840;12744254;415
chr2	12910905	12913905	PE_000654	12912405	3000	12912231;12912578;348
chr2	13029097	13032097	PE_000655	13030597	3000	13030424;13030770;347
chr2	13051012	13054012	PE_000656	13052512	3000	13052319;13052705;387
chr2	13087711	13090711	PE_000657	13089211	3000	13089046;13089375;330
chr2	13289619	13292619	PE_000658	13291119	3000	13291041;13291196;156
chr2	13303334	13306334	PE_000659	13304834	3000	13304577;13305090;514
chr2	13399568	13402568	PE_000660	13401068	3000	13400872;13401263;392
chr2	13518972	13521972	PE_000661	13520472	3000	13520417;13520527;111
chr2	13548159	13551159	PE_000662	13549659	3000	13549486;13549832;347
chr2	13626772	13629772	PE_000663	13628272	3000	13628124;13628419;296
chr2	13750928	13753928	PE_000664	13752428	3000	13751924;13752932;1009
chr2	13854814	13857814	PE_000665	13856314	3000	13856138;13856490;353
chr2	13855411	13858411	PE_000666	13856911	3000	13856605;13857216;612
chr2	13970312	13973312	PE_000667	13971812	3000	13971411;13972213;803
chr2	14023635	14026635	PE_000668	14025135	3000	14024971;14025299;329
chr2	14027680	14030680	PE_000669	14029180	3000	14028935;14029425;491
chr2	14034655	14037655	PE_000670	14036155	3000	14035979;14036331;353
chr2	14046078	14049078	PE_000671	14047578	3000	14047370;14047785;416
chr2	14106258	14109258	PE_000672	14107758	3000	14107725;14107791;67
chr2	14111435	14114435	PE_000673	14112935	3000	14112824;14113045;222
chr2	14202303	14205303	PE_000674	14203803	3000	14203398;14204207;810
chr2	14241558	14244558	PE_000675	14243058	3000	14242945;14243171;227
chr2	14246702	14249702	PE_000676	14248202	3000	14247958;14248446;489
chr2	14348809	14351809	PE_000677	14350309	3000	14350254;14350364;111
chr2	14394351	14397351	PE_000678	14395851	3000	14395497;14396204;708
chr2	14449550	14452550	PE_000679	14451050	3000	14450914;14451186;273
chr2	14457486	14460486	PE_000680	14458986	3000	14458867;14459104;238
chr2	14475925	14478925	PE_000681	14477425	3000	14477240;14477610;371
chr2	14504775	14507775	PE_000682	14506275	3000	14506101;14506448;348
chr2	14692240	14695240	PE_000683	14693740	3000	14693623;14693856;234
chr2	14713367	14716367	PE_000684	14714867	3000	14714768;14714965;198
chr2	14742127	14745127	PE_000685	14743627	3000	14743512;14743742;231
chr2	14808765	14811765	PE_000686	14810265	3000	14810177;14810353;177
chr2	14811846	14814846	PE_000687	14813346	3000	14813184;14813507;324
chr2	14817346	14820346	PE_000688	14818846	3000	14818717;14818975;259
chr2	14832279	14835279	PE_000689	14833779	3000	14833717;14833840;124
chr2	14863262	14866262	PE_000690	14864762	3000	14864562;14864961;400
chr2	14870768	14873768	PE_000691	14872268	3000	14872123;14872412;290
chr2	14878253	14881253	PE_000692	14879753	3000	14879373;14880132;760
chr2	14879677	14882677	PE_000693	14881177	3000	14880961;14881393;433
chr2	14927470	14930470	PE_000694	14928970	3000	14928606;14929333;728
chr2	14930163	14933163	PE_000695	14931663	3000	14931441;14931885;445
chr2	14938463	14941463	PE_000696	14939963	3000	14939912;14940014;103
chr2	14956487	14959487	PE_000697	14957987	3000	14957665;14958309;645
chr2	14995065	14998065	PE_000698	14996565	3000	14996450;14996679;230
chr2	15008754	15011754	PE_000699	15010254	3000	15010072;15010436;365
chr2	15054879	15057879	PE_000700	15056379	3000	15056294;15056464;171
chr2	15313226	15316226	PE_000701	15314726	3000	15314534;15314918;385
chr2	15319190	15322190	PE_000702	15320690	3000	15320428;15320952;525
chr2	15319705	15322705	PE_000703	15321205	3000	15321172;15321238;67
chr2	15320276	15323276	PE_000704	15321776	3000	15321729;15321822;94
chr2	15547980	15550980	PE_000705	15549480	3000	15549319;15549640;322
chr2	15574512	15577512	PE_000706	15576012	3000	15575817;15576206;390
chr2	15576733	15579733	PE_000707	15578233	3000	15578144;15578322;179
chr2	15648772	15651772	PE_000708	15650272	3000	15650146;15650397;252
chr2	15704045	15707045	PE_000709	15705545	3000	15705442;15705647;206
chr2	15855085	15858085	PE_000710	15856585	3000	15856404;15856765;362
chr2	15857706	15860706	PE_000711	15859206	3000	15859186;15859226;41
chr2	15858920	15861920	PE_000712	15860420	3000	15860156;15860683;528
chr2	15894960	15897960	PE_000713	15896460	3000	15896168;15896752;585
chr2	15984716	15987716	PE_000714	15986216	3000	15986047;15986385;339
chr2	15987415	15990415	PE_000715	15988915	3000	15988600;15989230;631
chr2	16024067	16027067	PE_000716	16025567	3000	16025377;16025756;380
chr2	16024414	16027414	PE_000717	16025914	3000	16025847;16025980;134
chr2	16032556	16035556	PE_000718	16034056	3000	16034041;16034070;30
chr2	16084873	16087873	PE_000719	16086373	3000	16086104;16086641;538
chr2	16150920	16153920	PE_000720	16152420	3000	16152305;16152534;230
chr2	16199443	16202443	PE_000721	16200943	3000	16200772;16201114;343
chr2	16201346	16204346	PE_000722	16202846	3000	16202678;16203013;336
chr2	16323307	16326307	PE_000723	16324807	3000	16324526;16325088;563
chr2	16386726	16389726	PE_000724	16388226	3000	16387961;16388490;530
chr2	16445061	16448061	PE_000725	16446561	3000	16446399;16446723;325
chr2	16515739	16518739	PE_000726	16517239	3000	16517146;16517331;186
chr2	16924632	16927632	PE_000727	16926132	3000	16925961;16926303;343
chr2	16933122	16936122	PE_000728	16934622	3000	16934314;16934930;617
chr2	16952452	16955452	PE_000729	16953952	3000	16953660;16954243;584
chr2	17074788	17077788	PE_000730	17076288	3000	17075943;17076633;691
chr2	17187781	17190781	PE_000731	17189281	3000	17188829;17189733;905
chr2	17280414	17283414	PE_000732	17281914	3000	17281575;17282252;678
chr2	17329885	17332885	PE_000733	17331385	3000	17330978;17331791;814
chr2	17561466	17564466	PE_000734	17562966	3000	17562781;17563151;371
chr2	17609066	17612066	PE_000735	17610566	3000	17610474;17610657;184
chr2	17614713	17617713	PE_000736	17616213	3000	17615520;17616905;1386
chr2	17695938	17698938	PE_000737	17697438	3000	17697298;17697578;281
chr2	17730411	17733411	PE_000738	17731911	3000	17731825;17731997;173
chr2	17793970	17796970	PE_000739	17795470	3000	17795416;17795524;109
chr2	17826949	17829949	PE_000740	17828449	3000	17828207;17828690;484
chr2	17838738	17841738	PE_000741	17840238	3000	17840105;17840371;267
chr2	17950662	17953662	PE_000742	17952162	3000	17952120;17952203;84
chr2	17951014	17954014	PE_000743	17952514	3000	17952472;17952555;84
chr2	17951706	17954706	PE_000744	17953206	3000	17952835;17953577;743
chr2	18110532	18113532	PE_000745	18112032	3000	18111659;18112405;747
chr2	18113750	18116750	PE_000746	18115250	3000	18114881;18115618;738
chr2	18121572	18124572	PE_000747	18123072	3000	18122739;18123405;667
chr2	18154592	18157592	PE_000748	18156092	3000	18156033;18156150;118
chr2	18192007	18195007	PE_000749	18193507	3000	18193431;18193583;153
chr2	18228645	18231645	PE_000750	18230145	3000	18230109;18230181;73
chr2	18276939	18279939	PE_000751	18278439	3000	18278230;18278647;418
chr2	18318928	18321928	PE_000752	18320428	3000	18320240;18320616;377
chr2	18459148	18462148	PE_000753	18460648	3000	18460604;18460692;89
chr2	18491754	18494754	PE_000754	18493254	3000	18492926;18493582;657
chr2	18575742	18578742	PE_000755	18577242	3000	18576721;18577763;1043
chr2	18597025	18600025	PE_000756	18598525	3000	18598257;18598793;537
chr2	18606382	18609382	PE_000757	18607882	3000	18607792;18607971;180
chr2	18607625	18610625	PE_000758	18609125	3000	18609010;18609240;231
chr2	18614324	18617324	PE_000759	18615824	3000	18615467;18616181;715
chr2	18670815	18673815	PE_000760	18672315	3000	18671836;18672793;958
chr2	18678848	18681848	PE_000761	18680348	3000	18680204;18680492;289
chr2	18679464	18682464	PE_000762	18680964	3000	18680709;18681219;511
chr2	18877010	18880010	PE_000763	18878510	3000	18878260;18878759;500
chr2	18936886	18939886	PE_000764	18938386	3000	18937965;18938806;842
chr2	19055311	19058311	PE_000765	19056811	3000	19056751;19056870;120
chr2	19055614	19058614	PE_000766	19057114	3000	19056995;19057233;239
chr2	19162318	19165318	PE_000767	19163818	3000	19163666;19163969;304
chr2	19234041	19237041	PE_000768	19235541	3000	19235478;19235603;126
chr2	19317914	19320914	PE_000769	19319414	3000	19318858;19319970;1113
chr2	19319398	19322398	PE_000770	19320898	3000	19320868;19320927;60
chr2	19385369	19388369	PE_000771	19386869	3000	19386423;19387315;893
chr2	19388915	19391915	PE_000772	19390415	3000	19390275;19390554;280
chr2	19435695	19438695	PE_000773	19437195	3000	19436879;19437511;633
chr2	19532929	19535929	PE_000774	19534429	3000	19534236;19534621;386
chr2	19544064	19547064	PE_000775	19545564	3000	19545393;19545735;343
chr2	19658987	19661987	PE_000776	19660487	3000	19660472;19660501;30
chr2	19680220	19683220	PE_000777	19681720	3000	19681575;19681864;290
chr2	19687875	19690875	PE_000778	19689375	3000	19688933;19689816;884
chr3	4767	7767	PE_000779	6267	3000	6067;6467;401
chr3	142236	145236	PE_000780	143736	3000	143349;144122;774
chr3	227623	230623	PE_000781	229123	3000	228869;229377;509
chr3	271370	274370	PE_000782	272870	3000	272445;273295;851
chr3	272323	275323	PE_000783	273823	3000	273795;273850;56
chr3	291732	294732	PE_000784	293232	3000	293049;293415;367
chr3	297142	300142	PE_000785	298642	3000	298609;298675;67
chr3	312414	315414	PE_000786	313914	3000	313831;313997;167
chr3	312898	315898	PE_000787	314398	3000	314333;314463;131
chr3	313277	316277	PE_000788	314777	3000	314592;314961;370
chr3	320367	323367	PE_000789	321867	3000	321450;322284;835
chr3	331767	334767	PE_000790	333267	3000	333022;333511;490
chr3	343071	346071	PE_000791	344571	3000	344071;345071;1001
chr3	345735	348735	PE_000792	347235	3000	347216;347254;39
chr3	345991	348991	PE_000793	347491	3000	347312;347670;359
chr3	413825	416825	PE_000794	415325	3000	415157;415492;336
chr3	414734	417734	PE_000795	416234	3000	416054;416413;360
chr3	416068	419068	PE_000796	417568	3000	417490;417646;157
chr3	491346	494346	PE_000797	492846	3000	492497;493194;698
chr3	493762	496762	PE_000798	495262	3000	494919;495604;686
chr3	591350	594350	PE_000799	592850	3000	592780;592919;140
chr3	591813	594813	PE_000800	593313	3000	593257;593368;112
chr3	653293	656293	PE_000801	654793	3000	654404;655182;779
chr3	657124	660124	PE_000802	658624	3000	658342;658905;564
chr3	694516	697516	PE_000803	696016	3000	695743;696288;546
chr3	702481	705481	PE_000804	703981	3000	703780;704181;402
chr3	704067	707067	PE_000805	705567	3000	705366;705768;403
chr3	725462	728462	PE_000806	726962	3000	726913;727010;98
chr3	766720	769720	PE_000807	768220	3000	768171;768268;98
chr3	773772	776772	PE_000808	775272	3000	775074;775470;397
chr3	799988	802988	PE_000809	801488	3000	801457;801519;63
chr3	806277	809277	PE_000810	807777	3000	807764;807789;26
chr3	870100	873100	PE_000811	871600	3000	871520;871680;161
chr3	935513	938513	PE_000812	937013	3000	936965;937060;96
chr3	966013	969013	PE_000813	967513	3000	967480;967546;67
chr3	966816	969816	PE_000814	968316	3000	967685;968947;1263
chr3	980405	983405	PE_000815	981905	3000	981840;981969;130
chr3	981340	984340	PE_000816	982840	3000	982572;983107;536
chr3	1046017	1049017	PE_000817	1047517	3000	1047273;1047761;489
chr3	1066540	1069540	PE_000818	1068040	3000	1067959;1068120;162
chr3	1099369	1102369	PE_000819	1100869	3000	1100798;1100939;142
chr3	1112260	1115260	PE_000820	1113760	3000	1113228;1114292;1065
chr3	1113060	1116060	PE_000821	1114560	3000	1114351;1114768;418
chr3	1153662	1156662	PE_000822	1155162	3000	1155132;1155191;60
chr3	1159782	1162782	PE_000823	1161282	3000	1161029;1161535;507
chr3	1298918	1301918	PE_000824	1300418	3000	1300314;1300522;209
chr3	1299484	1302484	PE_000825	1300984	3000	1300874;1301094;221
chr3	1307434	1310434	PE_000826	1308934	3000	1308891;1308976;86
chr3	1372166	1375166	PE_000827	1373666	3000	1373442;1373889;448
chr3	1391569	1394569	PE_000828	1393069	3000	1392821;1393316;496
chr3	1394551	1397551	PE_000829	1396051	3000	1395761;1396341;581
chr3	1426987	1429987	PE_000830	1428487	3000	1427776;1429197;1422
chr3	1434718	1437718	PE_000831	1436218	3000	1436014;1436421;408
chr3	1469501	1472501	PE_000832	1471001	3000	1470452;1471549;1098
chr3	1529791	1532791	PE_000833	1531291	3000	1531254;1531327;74
chr3	1569504	1572504	PE_000834	1571004	3000	1570856;1571152;297
chr3	1583589	1586589	PE_000835	1585089	3000	1584676;1585502;827
chr3	1610875	1613875	PE_000836	1612375	3000	1612280;1612470;191
chr3	1655718	1658718	PE_000837	1657218	3000	1656715;1657720;1006
chr3	1686155	1689155	PE_000838	1687655	3000	1687589;1687720;132
chr3	1718603	1721603	PE_000839	1720103	3000	1720026;1720179;154
chr3	1741751	1744751	PE_000840	1743251	3000	1743141;1743361;221
chr3	1742162	1745162	PE_000841	1743662	3000	1743489;1743835;347
chr3	1759319	1762319	PE_000842	1760819	3000	1760682;1760955;274
chr3	1762771	1765771	PE_000843	1764271	3000	1763855;1764686;832
chr3	1816668	1819668	PE_000844	1818168	3000	1817972;1818364;393
chr3	1817332	1820332	PE_000845	1818832	3000	1818759;1818905;147
chr3	1868230	1871230	PE_000846	1869730	3000	1869622;1869837;216
chr3	1868606	1871606	PE_000847	1870106	3000	1870053;1870159;107
chr3	1868827	1871827	PE_000848	1870327	3000	1870224;1870430;207
chr3	1897499	1900499	PE_000849	1898999	3000	1898720;1899278;559
chr3	1923081	1926081	PE_000850	1924581	3000	1924374;1924787;414
chr3	1971286	1974286	PE_000851	1972786	3000	1972699;1972872;174
chr3	2060780	2063780	PE_000852	2062280	3000	2062250;2062309;60
chr3	2077288	2080288	PE_000853	2078788	3000	2078690;2078885;196
chr3	2086097	2089097	PE_000854	2087597	3000	2087470;2087724;255
chr3	2103673	2106673	PE_000855	2105173	3000	2104966;2105379;414
chr3	2263184	2266184	PE_000856	2264684	3000	2264282;2265086;805
chr3	2280999	2283999	PE_000857	2282499	3000	2282437;2282560;124
chr3	2409600	2412600	PE_000858	2411100	3000	2411092;2411108;17
chr3	2468496	2471496	PE_000859	2469996	3000	2469948;2470043;96
chr3	2739185	2742185	PE_000860	2740685	3000	2740548;2740822;275
chr3	2741391	2744391	PE_000861	2742891	3000	2742590;2743191;602
chr3	2861473	2864473	PE_000862	2862973	3000	2862939;2863007;69
chr3	2909903	2912903	PE_000863	2911403	3000	2911205;2911600;396
chr3	2967360	2970360	PE_000864	2968860	3000	2968765;2968954;190
chr3	2967643	2970643	PE_000865	2969143	3000	2969126;2969159;34
chr3	2989883	2992883	PE_000866	2991383	3000	2991372;2991393;22
chr3	3013623	3016623	PE_000867	3015123	3000	3015003;3015243;241
chr3	3135965	3138965	PE_000868	3137465	3000	3137409;3137521;113
chr3	3137507	3140507	PE_000869	3139007	3000	3138614;3139399;786
chr3	3144657	3147657	PE_000870	3146157	3000	3146025;3146289;265
chr3	3155964	3158964	PE_000871	3157464	3000	3157352;3157575;224
chr3	3188378	3191378	PE_000872	3189878	3000	3189721;3190035;315
chr3	3230661	3233661	PE_000873	3232161	3000	3232105;3232216;112
chr3	3352903	3355903	PE_000874	3354403	3000	3354365;3354441;77
chr3	3404209	3407209	PE_000875	3405709	3000	3405587;3405830;244
chr3	3439569	3442569	PE_000876	3441069	3000	3440923;3441215;293
chr3	3445952	3448952	PE_000877	3447452	3000	3447267;3447636;370
chr3	3511847	3514847	PE_000878	3513347	3000	3513011;3513683;673
chr3	3603700	3606700	PE_000879	3605200	3000	3605083;3605316;234
chr3	3662582	3665582	PE_000880	3664082	3000	3663803;3664360;558
chr3	3788230	3791230	PE_000881	3789730	3000	3789681;3789778;98
chr3	3858595	3861595	PE_000882	3860095	3000	3859782;3860408;627
chr3	3879281	3882281	PE_000883	3880781	3000	3880536;3881026;491
chr3	3958740	3961740	PE_000884	3960240	3000	3960185;3960295;111
chr3	3980413	3983413	PE_000885	3981913	3000	3981810;3982015;206
chr3	3987138	3990138	PE_000886	3988638	3000	3988452;3988823;372
chr3	4037959	4040959	PE_000887	4039459	3000	4038935;4039982;1048
chr3	4041613	4044613	PE_000888	4043113	3000	4042915;4043310;396
chr3	4056667	4059667	PE_000889	4058167	3000	4058099;4058234;136
chr3	4057023	4060023	PE_000890	4058523	3000	4058336;4058710;375
chr3	4057413	4060413	PE_000891	4058913	3000	4058798;4059028;231
chr3	4057810	4060810	PE_000892	4059310	3000	4059113;4059507;395
chr3	4093718	4096718	PE_000893	4095218	3000	4094932;4095503;572
chr3	4115209	4118209	PE_000894	4116709	3000	4116579;4116838;260
chr3	4159738	4162738	PE_000895	4161238	3000	4160944;4161531;588
chr3	4168029	4171029	PE_000896	4169529	3000	4169280;4169778;499
chr3	4170548	4173548	PE_000897	4172048	3000	4171810;4172285;476
chr3	4201292	4204292	PE_000898	4202792	3000	4202519;4203064;546
chr3	4243126	4246126	PE_000899	4244626	3000	4244158;4245094;937
chr3	4333197	4336197	PE_000900	4334697	3000	4334646;4334747;102
chr3	4333596	4336596	PE_000901	4335096	3000	4334836;4335356;521
chr3	4336465	4339465	PE_000902	4337965	3000	4337636;4338294;659
chr3	4394047	4397047	PE_000903	4395547	3000	4395377;4395716;340
chr3	4404968	4407968	PE_000904	4406468	3000	4406213;4406722;510
chr3	4427579	4430579	PE_000905	4429079	3000	4429006;4429152;147
chr3	4427982	4430982	PE_000906	4429482	3000	4429239;4429725;487
chr3	4446272	4449272	PE_000907	4447772	3000	4447522;4448021;500
chr3	4488796	4491796	PE_000908	4490296	3000	4489891;4490701;811
chr3	4539446	4542446	PE_000909	4540946	3000	4540888;4541004;117
chr3	4560114	4563114	PE_000910	4561614	3000	4561299;4561929;631
chr3	4563812	4566812	PE_000911	4565312	3000	4565142;4565481;340
chr3	4564167	4567167	PE_000912	4565667	3000	4565514;4565819;306
chr3	4572960	4575960	PE_000913	4574460	3000	4574208;4574712;505
chr3	4590985	4593985	PE_000914	4592485	3000	4592382;4592588;207
chr3	4598342	4601342	PE_000915	4599842	3000	4599813;4599871;59
chr3	4608332	4611332	PE_000916	4609832	3000	4609788;4609876;89
chr3	4643230	4646230	PE_000917	4644730	3000	4644674;4644785;112
chr3	4696881	4699881	PE_000918	4698381	3000	4698076;4698685;610
chr3	4760429	4763429	PE_000919	4761929	3000	4761865;4761993;129
chr3	4790121	4793121	PE_000920	4791621	3000	4791556;4791685;130
chr3	4790598	4793598	PE_000921	4792098	3000	4792039;4792156;118
chr3	4792209	4795209	PE_000922	4793709	3000	4793652;4793766;115
chr3	4847858	4850858	PE_000923	4849358	3000	4849212;4849504;293
chr3	4901414	4904414	PE_000924	4902914	3000	4902565;4903263;699
chr3	4984505	4987505	PE_000925	4986005	3000	4985569;4986441;873
chr3	4992105	4995105	PE_000926	4993605	3000	4993556;4993653;98
chr3	4992346	4995346	PE_000927	4993846	3000	4993787;4993905;119
chr3	4996595	4999595	PE_000928	4998095	3000	4998035;4998154;120
chr3	4996816	4999816	PE_000929	4998316	3000	4998294;4998338;45
chr3	5021603	5024603	PE_000930	5023103	3000	5022969;5023236;268
chr3	5022039	5025039	PE_000931	5023539	3000	5023365;5023713;349
chr3	5023719	5026719	PE_000932	5025219	3000	5025095;5025342;248
chr3	5034142	5037142	PE_000933	5035642	3000	5035261;5036022;762
chr3	5097817	5100817	PE_000934	5099317	3000	5098971;5099663;693
chr3	5201268	5204268	PE_000935	5202768	3000	5202588;5202948;361
chr3	5201713	5204713	PE_000936	5203213	3000	5203036;5203390;355
chr3	5285760	5288760	PE_000937	5287260	3000	5287079;5287440;362
chr3	5437993	5440993	PE_000938	5439493	3000	5439250;5439736;487
chr3	5654700	5657700	PE_000939	5656200	3000	5656037;5656362;326
chr3	5660842	5663842	PE_000940	5662342	3000	5661876;5662807;932
chr3	5661977	5664977	PE_000941	5663477	3000	5663436;5663517;82
chr3	5757557	5760557	PE_000942	5759057	3000	5758830;5759284;455
chr3	5784702	5787702	PE_000943	5786202	3000	5786098;5786305;208
chr3	5807327	5810327	PE_000944	5808827	3000	5808190;5809463;1274
chr3	5808377	5811377	PE_000945	5809877	3000	5809868;5809885;18
chr3	5828014	5831014	PE_000946	5829514	3000	5829427;5829601;175
chr3	5835914	5838914	PE_000947	5837414	3000	5837059;5837768;710
chr3	5837588	5840588	PE_000948	5839088	3000	5838965;5839211;247
chr3	5960676	5963676	PE_000949	5962176	3000	5962076;5962275;200
chr3	6062182	6065182	PE_000950	6063682	3000	6063352;6064011;660
chr3	6094788	6097788	PE_000951	6096288	3000	6096262;6096313;52
chr3	6098400	6101400	PE_000952	6099900	3000	6099633;6100166;534
chr3	6130485	6133485	PE_000953	6131985	3000	6131958;6132011;54
chr3	6257154	6260154	PE_000954	6258654	3000	6258586;6258721;136
chr3	6329755	6332755	PE_000955	6331255	3000	6331167;6331343;177
chr3	6364244	6367244	PE_000956	6365744	3000	6365425;6366063;639
chr3	6366554	6369554	PE_000957	6368054	3000	6367938;6368170;233
chr3	6494636	6497636	PE_000958	6496136	3000	6495951;6496320;370
chr3	6540929	6543929	PE_000959	6542429	3000	6542240;6542618;379
chr3	6576064	6579064	PE_000960	6577564	3000	6577262;6577866;605
chr3	6647413	6650413	PE_000961	6648913	3000	6648788;6649038;251
chr3	6647726	6650726	PE_000962	6649226	3000	6649142;6649309;168
chr3	6691921	6694921	PE_000963	6693421	3000	6693123;6693719;597
chr3	6708893	6711893	PE_000964	6710393	3000	6710344;6710442;99
chr3	6712536	6715536	PE_000965	6714036	3000	6713800;6714272;473
chr3	6734240	6737240	PE_000966	6735740	3000	6735669;6735811;143
chr3	6788437	6791437	PE_000967	6789937	3000	6789881;6789993;113
chr3	6800474	6803474	PE_000968	6801974	3000	6801623;6802325;703
chr3	6824620	6827620	PE_000969	6826120	3000	6825973;6826266;294
chr3	6848568	6851568	PE_000970	6850068	3000	6849868;6850267;400
chr3	6849011	6852011	PE_000971	6850511	3000	6850401;6850621;221
chr3	6880759	6883759	PE_000972	6882259	3000	6882069;6882449;381
chr3	6957926	6960926	PE_000973	6959426	3000	6959239;6959613;375
chr3	6996536	6999536	PE_000974	6998036	3000	6997995;6998077;83
chr3	7017330	7020330	PE_000975	7018830	3000	7018568;7019092;525
chr3	7027090	7030090	PE_000976	7028590	3000	7028570;7028609;40
chr3	7027381	7030381	PE_000977	7028881	3000	7028813;7028948;136
chr3	7042887	7045887	PE_000978	7044387	3000	7044209;7044565;357
chr3	7057492	7060492	PE_000979	7058992	3000	7058955;7059028;74
chr3	7061963	7064963	PE_000980	7063463	3000	7063154;7063771;618
chr3	7062428	7065428	PE_000981	7063928	3000	7063856;7064000;145
chr3	7064759	7067759	PE_000982	7066259	3000	7066120;7066398;279
chr3	7155049	7158049	PE_000983	7156549	3000	7156309;7156788;480
chr3	7258420	7261420	PE_000984	7259920	3000	7259774;7260065;292
chr3	7258965	7261965	PE_000985	7260465	3000	7260170;7260759;590
chr3	7277139	7280139	PE_000986	7278639	3000	7278223;7279054;832
chr3	7491397	7494397	PE_000987	7492897	3000	7492654;7493140;487
chr3	7500447	7503447	PE_000988	7501947	3000	7501588;7502306;719
chr3	7505724	7508724	PE_000989	7507224	3000	7507055;7507392;338
chr3	7542588	7545588	PE_000990	7544088	3000	7543718;7544458;741
chr3	7566031	7569031	PE_000991	7567531	3000	7567372;7567690;319
chr3	7583351	7586351	PE_000992	7584851	3000	7584696;7585005;310
chr3	7893714	7896714	PE_000993	7895214	3000	7895063;7895364;302
chr3	7894049	7897049	PE_000994	7895549	3000	7895473;7895624;152
chr3	8199019	8202019	PE_000995	8200519	3000	8200511;8200527;17
chr3	8436333	8439333	PE_000996	8437833	3000	8437508;8438157;650
chr3	8560136	8563136	PE_000997	8561636	3000	8561433;8561839;407
chr3	8623079	8626079	PE_000998	8624579	3000	8624399;8624758;360
chr3	8670959	8673959	PE_000999	8672459	3000	8672391;8672526;136
chr3	8671236	8674236	PE_001000	8672736	3000	8672607;8672865;259
chr3	8676718	8679718	PE_001001	8678218	3000	8678098;8678338;241
chr3	8751761	8754761	PE_001002	8753261	3000	8753090;8753431;342
chr3	8826060	8829060	PE_001003	8827560	3000	8827553;8827567;15
chr3	8828241	8831241	PE_001004	8829741	3000	8829563;8829918;356
chr3	8961837	8964837	PE_001005	8963337	3000	8963206;8963468;263
chr3	8962206	8965206	PE_001006	8963706	3000	8963514;8963897;384
chr3	8986317	8989317	PE_001007	8987817	3000	8987676;8987958;283
chr3	9024026	9027026	PE_001008	9025526	3000	9025429;9025622;194
chr3	9107632	9110632	PE_001009	9109132	3000	9109066;9109197;132
chr3	9111868	9114868	PE_001010	9113368	3000	9113291;9113444;154
chr3	9118235	9121235	PE_001011	9119735	3000	9119495;9119975;481
chr3	9190775	9193775	PE_001012	9192275	3000	9192117;9192433;317
chr3	9242774	9245774	PE_001013	9244274	3000	9244149;9244399;251
chr3	9424564	9427564	PE_001014	9426064	3000	9425897;9426231;335
chr3	9600994	9603994	PE_001015	9602494	3000	9602429;9602559;131
chr3	9688810	9691810	PE_001016	9690310	3000	9690287;9690333;47
chr3	9689634	9692634	PE_001017	9691134	3000	9690802;9691466;665
chr3	9824076	9827076	PE_001018	9825576	3000	9825536;9825616;81
chr3	10002841	10005841	PE_001019	10004341	3000	10004159;10004522;364
chr3	10022087	10025087	PE_001020	10023587	3000	10023056;10024117;1062
chr3	10023212	10026212	PE_001021	10024712	3000	10024689;10024734;46
chr3	10091099	10094099	PE_001022	10092599	3000	10092461;10092736;276
chr3	10153838	10156838	PE_001023	10155338	3000	10155165;10155510;346
chr3	10161556	10164556	PE_001024	10163056	3000	10162759;10163352;594
chr3	10279243	10282243	PE_001025	10280743	3000	10280548;10280937;390
chr3	10279570	10282570	PE_001026	10281070	3000	10280992;10281148;157
chr3	10424758	10427758	PE_001027	10426258	3000	10426243;10426273;31
chr3	10491145	10494145	PE_001028	10492645	3000	10492494;10492795;302
chr3	10499647	10502647	PE_001029	10501147	3000	10501082;10501212;131
chr3	10580358	10583358	PE_001030	10581858	3000	10581804;10581911;108
chr3	10606756	10609756	PE_001031	10608256	3000	10608145;10608367;223
chr3	10609610	10612610	PE_001032	10611110	3000	10610988;10611232;245
chr3	10655617	10658617	PE_001033	10657117	3000	10656878;10657355;478
chr3	10669777	10672777	PE_001034	10671277	3000	10671031;10671523;493
chr3	10729506	10732506	PE_001035	10731006	3000	10730975;10731037;63
chr3	10731616	10734616	PE_001036	10733116	3000	10732993;10733238;246
chr3	10870735	10873735	PE_001037	10872235	3000	10871996;10872474;479
chr3	10890952	10893952	PE_001038	10892452	3000	10892170;10892734;565
chr3	10892392	10895392	PE_001039	10893892	3000	10893834;10893950;117
chr3	11147386	11150386	PE_001040	11148886	3000	11148755;11149016;262
chr3	11232736	11235736	PE_001041	11234236	3000	11234093;11234379;287
chr3	11257646	11260646	PE_001042	11259146	3000	11258928;11259364;437
chr3	11295522	11298522	PE_001043	11297022	3000	11296922;11297122;201
chr3	12359184	12362184	PE_001044	12360684	3000	12360433;12360935;503
chr3	12589819	12592819	PE_001045	12591319	3000	12591139;12591499;361
chr3	15189169	15192169	PE_001046	15190669	3000	15190317;15191020;704
chr3	15195271	15198271	PE_001047	15196771	3000	15196654;15196887;234
chr3	15232424	15235424	PE_001048	15233924	3000	15233867;15233981;115
chr3	15233174	15236174	PE_001049	15234674	3000	15234624;15234723;100
chr3	15233724	15236724	PE_001050	15235224	3000	15235167;15235281;115
chr3	15516143	15519143	PE_001051	15517643	3000	15517372;15517914;543
chr3	15751813	15754813	PE_001052	15753313	3000	15753094;15753531;438
chr3	15817045	15820045	PE_001053	15818545	3000	15818348;15818741;394
chr3	16359480	16362480	PE_001054	16360980	3000	16360820;16361140;321
chr3	16458388	16461388	PE_001055	16459888	3000	16459719;16460056;338
chr3	16505768	16508768	PE_001056	16507268	3000	16507089;16507447;359
chr3	16619660	16622660	PE_001057	16621160	3000	16621044;16621276;233
chr3	16658142	16661142	PE_001058	16659642	3000	16659521;16659762;242
chr3	16658784	16661784	PE_001059	16660284	3000	16660101;16660466;366
chr3	16716284	16719284	PE_001060	16717784	3000	16717740;16717827;88
chr3	16757968	16760968	PE_001061	16759468	3000	16759449;16759486;38
chr3	16758521	16761521	PE_001062	16760021	3000	16759976;16760065;90
chr3	16760420	16763420	PE_001063	16761920	3000	16761794;16762045;252
chr3	16843881	16846881	PE_001064	16845381	3000	16845245;16845517;273
chr3	16865574	16868574	PE_001065	16867074	3000	16867006;16867141;136
chr3	17222225	17225225	PE_001066	17223725	3000	17223438;17224012;575
chr3	17462347	17465347	PE_001067	17463847	3000	17463805;17463888;84
chr3	17529561	17532561	PE_001068	17531061	3000	17531021;17531101;81
chr3	17622691	17625691	PE_001069	17624191	3000	17623872;17624510;639
chr3	17656816	17659816	PE_001070	17658316	3000	17658104;17658527;424
chr3	17723525	17726525	PE_001071	17725025	3000	17724976;17725074;99
chr3	17723946	17726946	PE_001072	17725446	3000	17725307;17725584;278
chr3	17795655	17798655	PE_001073	17797155	3000	17796965;17797345;381
chr3	17867458	17870458	PE_001074	17868958	3000	17868798;17869118;321
chr3	17874750	17877750	PE_001075	17876250	3000	17876139;17876360;222
chr3	18029047	18032047	PE_001076	18030547	3000	18030130;18030963;834
chr3	18076549	18079549	PE_001077	18078049	3000	18077991;18078106;116
chr3	18091072	18094072	PE_001078	18092572	3000	18092161;18092982;822
chr3	18091693	18094693	PE_001079	18093193	3000	18093087;18093298;212
chr3	18105813	18108813	PE_001080	18107313	3000	18107036;18107590;555
chr3	18182572	18185572	PE_001081	18184072	3000	18183928;18184216;289
chr3	18185546	18188546	PE_001082	18187046	3000	18186844;18187247;404
chr3	18219082	18222082	PE_001083	18220582	3000	18220432;18220731;300
chr3	18289253	18292253	PE_001084	18290753	3000	18290477;18291029;553
chr3	18323085	18326085	PE_001085	18324585	3000	18324344;18324826;483
chr3	18333515	18336515	PE_001086	18335015	3000	18334965;18335065;101
chr3	18333750	18336750	PE_001087	18335250	3000	18335158;18335342;185
chr3	18448487	18451487	PE_001088	18449987	3000	18449912;18450062;151
chr3	18469632	18472632	PE_001089	18471132	3000	18470930;18471334;405
chr3	18675132	18678132	PE_001090	18676632	3000	18676390;18676873;484
chr3	18709208	18712208	PE_001091	18710708	3000	18710648;18710767;120
chr3	18740282	18743282	PE_001092	18741782	3000	18741699;18741865;167
chr3	18873601	18876601	PE_001093	18875101	3000	18874956;18875245;290
chr3	18956262	18959262	PE_001094	18957762	3000	18957655;18957869;215
chr3	19031944	19034944	PE_001095	19033444	3000	19033092;19033795;704
chr3	19035374	19038374	PE_001096	19036874	3000	19036589;19037159;571
chr3	19039743	19042743	PE_001097	19041243	3000	19041090;19041396;307
chr3	19051840	19054840	PE_001098	19053340	3000	19053189;19053491;303
chr3	19054618	19057618	PE_001099	19056118	3000	19056049;19056186;138
chr3	19055080	19058080	PE_001100	19056580	3000	19056246;19056914;669
chr3	19058606	19061606	PE_001101	19060106	3000	19059891;19060320;430
chr3	19062104	19065104	PE_001102	19063604	3000	19063447;19063761;315
chr3	19129738	19132738	PE_001103	19131238	3000	19131078;19131398;321
chr3	19137843	19140843	PE_001104	19139343	3000	19139140;19139545;406
chr3	19161354	19164354	PE_001105	19162854	3000	19162510;19163197;688
chr3	19224079	19227079	PE_001106	19225579	3000	19225422;19225735;314
chr3	19324328	19327328	PE_001107	19325828	3000	19325587;19326068;482
chr3	19348053	19351053	PE_001108	19349553	3000	19349393;19349713;321
chr3	19381259	19384259	PE_001109	19382759	3000	19382711;19382807;97
chr3	19392261	19395261	PE_001110	19393761	3000	19393385;19394136;752
chr3	19599694	19602694	PE_001111	19601194	3000	19601038;19601349;312
chr3	19635494	19638494	PE_001112	19636994	3000	19636804;19637183;380
chr3	19662858	19665858	PE_001113	19664358	3000	19664314;19664402;89
chr3	19680356	19683356	PE_001114	19681856	3000	19681838;19681873;36
chr3	19721829	19724829	PE_001115	19723329	3000	19723212;19723446;235
chr3	19726162	19729162	PE_001116	19727662	3000	19727549;19727775;227
chr3	19765023	19768023	PE_001117	19766523	3000	19766380;19766665;286
chr3	19782322	19785322	PE_001118	19783822	3000	19783644;19783999;356
chr3	19782672	19785672	PE_001119	19784172	3000	19784165;19784178;14
chr3	19844755	19847755	PE_001120	19846255	3000	19845618;19846891;1274
chr3	19865803	19868803	PE_001121	19867303	3000	19867207;19867398;192
chr3	19873362	19876362	PE_001122	19874862	3000	19874375;19875349;975
chr3	19922848	19925848	PE_001123	19924348	3000	19924271;19924424;154
chr3	19939001	19942001	PE_001124	19940501	3000	19940226;19940775;550
chr3	19940342	19943342	PE_001125	19941842	3000	19941823;19941860;38
chr3	20006917	20009917	PE_001126	20008417	3000	20008074;20008759;686
chr3	20077319	20080319	PE_001127	20078819	3000	20078773;20078864;92
chr3	20194646	20197646	PE_001128	20196146	3000	20195968;20196323;356
chr3	20277279	20280279	PE_001129	20278779	3000	20278649;20278908;260
chr3	20497291	20500291	PE_001130	20498791	3000	20498758;20498823;66
chr3	20554949	20557949	PE_001131	20556449	3000	20556326;20556572;247
chr3	20641467	20644467	PE_001132	20642967	3000	20642514;20643420;907
chr3	20680140	20683140	PE_001133	20681640	3000	20681475;20681805;331
chr3	20739314	20742314	PE_001134	20740814	3000	20740670;20740957;288
chr3	20746101	20749101	PE_001135	20747601	3000	20747497;20747704;208
chr3	20831177	20834177	PE_001136	20832677	3000	20832629;20832725;97
chr3	20831769	20834769	PE_001137	20833269	3000	20833177;20833361;185
chr3	20870993	20873993	PE_001138	20872493	3000	20872209;20872777;569
chr3	20884569	20887569	PE_001139	20886069	3000	20885969;20886168;200
chr3	21002932	21005932	PE_001140	21004432	3000	21004355;21004508;154
chr3	21003182	21006182	PE_001141	21004682	3000	21004612;21004752;141
chr3	21012180	21015180	PE_001142	21013680	3000	21013425;21013934;510
chr3	21194750	21197750	PE_001143	21196250	3000	21196125;21196374;250
chr3	21230364	21233364	PE_001144	21231864	3000	21231755;21231973;219
chr3	21361476	21364476	PE_001145	21362976	3000	21362792;21363159;368
chr3	21379449	21382449	PE_001146	21380949	3000	21380755;21381142;388
chr3	21396212	21399212	PE_001147	21397712	3000	21397566;21397857;292
chr3	21424632	21427632	PE_001148	21426132	3000	21425900;21426364;465
chr3	21429967	21432967	PE_001149	21431467	3000	21431426;21431507;82
chr3	21494993	21497993	PE_001150	21496493	3000	21496323;21496663;341
chr3	21518432	21521432	PE_001151	21519932	3000	21519756;21520107;352
chr3	21646889	21649889	PE_001152	21648389	3000	21648099;21648678;580
chr3	21658945	21661945	PE_001153	21660445	3000	21660107;21660783;677
chr3	21743312	21746312	PE_001154	21744812	3000	21744424;21745200;777
chr3	21776920	21779920	PE_001155	21778420	3000	21778388;21778451;64
chr3	21785306	21788306	PE_001156	21786806	3000	21786645;21786967;323
chr3	21841234	21844234	PE_001157	21842734	3000	21842348;21843120;773
chr3	21856769	21859769	PE_001158	21858269	3000	21857986;21858552;567
chr3	21922875	21925875	PE_001159	21924375	3000	21924223;21924526;304
chr3	21957950	21960950	PE_001160	21959450	3000	21959250;21959649;400
chr3	22050458	22053458	PE_001161	22051958	3000	22051613;22052303;691
chr3	22077501	22080501	PE_001162	22079001	3000	22078916;22079085;170
chr3	22089055	22092055	PE_001163	22090555	3000	22090399;22090710;312
chr3	22100795	22103795	PE_001164	22102295	3000	22102094;22102495;402
chr3	22129070	22132070	PE_001165	22130570	3000	22130500;22130639;140
chr3	22129358	22132358	PE_001166	22130858	3000	22130782;22130933;152
chr3	22137397	22140397	PE_001167	22138897	3000	22138524;22139269;746
chr3	22191112	22194112	PE_001168	22192612	3000	22192493;22192730;238
chr3	22289975	22292975	PE_001169	22291475	3000	22291136;22291813;678
chr3	22290572	22293572	PE_001170	22292072	3000	22292063;22292080;18
chr3	22355100	22358100	PE_001171	22356600	3000	22356420;22356780;361
chr3	22401376	22404376	PE_001172	22402876	3000	22402828;22402924;97
chr3	22490229	22493229	PE_001173	22491729	3000	22491300;22492158;859
chr3	22634121	22637121	PE_001174	22635621	3000	22635266;22635976;711
chr3	22714088	22717088	PE_001175	22715588	3000	22715358;22715818;461
chr3	22810188	22813188	PE_001176	22811688	3000	22811638;22811737;100
chr3	22810663	22813663	PE_001177	22812163	3000	22812058;22812267;210
chr3	22837526	22840526	PE_001178	22839026	3000	22838891;22839160;270
chr3	22845698	22848698	PE_001179	22847198	3000	22846894;22847502;609
chr3	22849190	22852190	PE_001180	22850690	3000	22850525;22850854;330
chr3	22866195	22869195	PE_001181	22867695	3000	22867389;22868001;613
chr3	22898440	22901440	PE_001182	22899940	3000	22899818;22900062;245
chr3	22969860	22972860	PE_001183	22971360	3000	22971063;22971657;595
chr3	22989535	22992535	PE_001184	22991035	3000	22990499;22991570;1072
chr3	23032128	23035128	PE_001185	23033628	3000	23033467;23033788;322
chr3	23040484	23043484	PE_001186	23041984	3000	23041663;23042304;642
chr3	23235395	23238395	PE_001187	23236895	3000	23236699;23237091;393
chr3	23271636	23274636	PE_001188	23273136	3000	23272865;23273406;542
chr4	9218	12218	PE_001189	10718	3000	10413;11022;610
chr4	166033	169033	PE_001190	167533	3000	167447;167619;173
chr4	206520	209520	PE_001191	208020	3000	207977;208063;87
chr4	209383	212383	PE_001192	210883	3000	210776;210989;214
chr4	259628	262628	PE_001193	261128	3000	260848;261408;561
chr4	284109	287109	PE_001194	285609	3000	285110;286107;998
chr4	331670	334670	PE_001195	333170	3000	333157;333182;26
chr4	332433	335433	PE_001196	333933	3000	333428;334438;1011
chr4	333080	336080	PE_001197	334580	3000	334526;334634;109
chr4	372343	375343	PE_001198	373843	3000	373695;373990;296
chr4	374152	377152	PE_001199	375652	3000	375487;375816;330
chr4	443772	446772	PE_001200	445272	3000	444996;445547;552
chr4	525392	528392	PE_001201	526892	3000	526231;527552;1322
chr4	530623	533623	PE_001202	532123	3000	531908;532338;431
chr4	536374	539374	PE_001203	537874	3000	537718;538030;313
chr4	668901	671901	PE_001204	670401	3000	670256;670546;291
chr4	765462	768462	PE_001205	766962	3000	766774;767149;376
chr4	849667	852667	PE_001206	851167	3000	851071;851263;193
chr4	942641	945641	PE_001207	944141	3000	943945;944337;393
chr4	977465	980465	PE_001208	978965	3000	978835;979095;261
chr4	1039525	1042525	PE_001209	1041025	3000	1040835;1041214;380
chr4	1069784	1072784	PE_001210	1071284	3000	1071267;1071301;35
chr4	1108344	1111344	PE_001211	1109844	3000	1109740;1109948;209
chr4	1196116	1199116	PE_001212	1197616	3000	1197485;1197747;263
chr4	1198765	1201765	PE_001213	1200265	3000	1199901;1200629;729
chr4	1199265	1202265	PE_001214	1200765	3000	1200706;1200824;119
chr4	1375008	1378008	PE_001215	1376508	3000	1376398;1376617;220
chr4	1389460	1392460	PE_001216	1390960	3000	1390681;1391239;559
chr4	1464756	1467756	PE_001217	1466256	3000	1466040;1466471;432
chr4	1468583	1471583	PE_001218	1470083	3000	1469562;1470603;1042
chr4	1469226	1472226	PE_001219	1470726	3000	1470680;1470771;92
chr4	1488851	1491851	PE_001220	1490351	3000	1490150;1490552;403
chr4	1579892	1582892	PE_001221	1581392	3000	1581365;1581418;54
chr4	2111876	2114876	PE_001222	2113376	3000	2113214;2113537;324
chr4	2387382	2390382	PE_001223	2388882	3000	2388706;2389058;353
chr4	2387672	2390672	PE_001224	2389172	3000	2389132;2389212;81
chr4	2523969	2526969	PE_001225	2525469	3000	2525177;2525761;585
chr4	2633649	2636649	PE_001226	2635149	3000	2634917;2635380;464
chr4	2673518	2676518	PE_001227	2675018	3000	2674796;2675240;445
chr4	5459955	5462955	PE_001228	5461455	3000	5461326;5461583;258
chr4	5816345	5819345	PE_001229	5817845	3000	5817827;5817862;36
chr4	5819045	5822045	PE_001230	5820545	3000	5820488;5820601;114
chr4	5897214	5900214	PE_001231	5898714	3000	5898592;5898836;245
chr4	5922788	5925788	PE_001232	5924288	3000	5923823;5924753;931
chr4	6368621	6371621	PE_001233	6370121	3000	6369868;6370374;507
chr4	6453466	6456466	PE_001234	6454966	3000	6454668;6455263;596
chr4	6536917	6539917	PE_001235	6538417	3000	6538329;6538505;177
chr4	6574768	6577768	PE_001236	6576268	3000	6576140;6576396;257
chr4	6759045	6762045	PE_001237	6760545	3000	6760255;6760834;580
chr4	6772258	6775258	PE_001238	6773758	3000	6773732;6773784;53
chr4	6842309	6845309	PE_001239	6843809	3000	6843713;6843904;192
chr4	6892568	6895568	PE_001240	6894068	3000	6893962;6894174;213
chr4	6962896	6965896	PE_001241	6964396	3000	6964327;6964465;139
chr4	6966040	6969040	PE_001242	6967540	3000	6967395;6967685;291
chr4	6980427	6983427	PE_001243	6981927	3000	6981648;6982206;559
chr4	6993228	6996228	PE_001244	6994728	3000	6994669;6994786;118
chr4	7073930	7076930	PE_001245	7075430	3000	7075358;7075502;145
chr4	7091867	7094867	PE_001246	7093367	3000	7093336;7093398;63
chr4	7184110	7187110	PE_001247	7185610	3000	7185315;7185905;591
chr4	7264407	7267407	PE_001248	7265907	3000	7265848;7265966;119
chr4	7430577	7433577	PE_001249	7432077	3000	7431958;7432196;239
chr4	7455932	7458932	PE_001250	7457432	3000	7457318;7457546;229
chr4	7456327	7459327	PE_001251	7457827	3000	7457590;7458063;474
chr4	7493043	7496043	PE_001252	7494543	3000	7494140;7494945;806
chr4	7496266	7499266	PE_001253	7497766	3000	7497484;7498048;565
chr4	7529546	7532546	PE_001254	7531046	3000	7530858;7531234;377
chr4	7785826	7788826	PE_001255	7787326	3000	7786891;7787760;870
chr4	7938798	7941798	PE_001256	7940298	3000	7940269;7940327;59
chr4	7963176	7966176	PE_001257	7964676	3000	7964634;7964718;85
chr4	7967476	7970476	PE_001258	7968976	3000	7968782;7969170;389
chr4	8028647	8031647	PE_001259	8030147	3000	8029864;8030429;566
chr4	8110242	8113242	PE_001260	8111742	3000	8111578;8111906;329
chr4	8209815	8212815	PE_001261	8211315	3000	8211180;8211449;270
chr4	8211936	8214936	PE_001262	8213436	3000	8213266;8213605;340
chr4	8242482	8245482	PE_001263	8243982	3000	8243780;8244183;404
chr4	8552102	8555102	PE_001264	8553602	3000	8553381;8553823;443
chr4	8580549	8583549	PE_001265	8582049	3000	8581988;8582110;123
chr4	8661213	8664213	PE_001266	8662713	3000	8662669;8662757;89
chr4	8677657	8680657	PE_001267	8679157	3000	8679048;8679265;218
chr4	8678442	8681442	PE_001268	8679942	3000	8679841;8680043;203
chr4	8685647	8688647	PE_001269	8687147	3000	8686906;8687388;483
chr4	8686399	8689399	PE_001270	8687899	3000	8687474;8688323;850
chr4	8693432	8696432	PE_001271	8694932	3000	8694785;8695079;295
chr4	8694098	8697098	PE_001272	8695598	3000	8695122;8696073;952
chr4	8694967	8697967	PE_001273	8696467	3000	8696276;8696658;383
chr4	8824662	8827662	PE_001274	8826162	3000	8825771;8826552;782
chr4	8830361	8833361	PE_001275	8831861	3000	8831574;8832148;575
chr4	8863561	8866561	PE_001276	8865061	3000	8865027;8865094;68
chr4	8890873	8893873	PE_001277	8892373	3000	8891970;8892775;806
chr4	8947900	8950900	PE_001278	8949400	3000	8949076;8949724;649
chr4	8999767	9002767	PE_001279	9001267	3000	9001031;9001502;472
chr4	9014768	9017768	PE_001280	9016268	3000	9016194;9016341;148
chr4	9015695	9018695	PE_001281	9017195	3000	9016941;9017449;509
chr4	9106764	9109764	PE_001282	9108264	3000	9108154;9108373;220
chr4	9107001	9110001	PE_001283	9108501	3000	9108402;9108600;199
chr4	9140143	9143143	PE_001284	9141643	3000	9141452;9141833;382
chr4	9151678	9154678	PE_001285	9153178	3000	9152956;9153400;445
chr4	9160218	9163218	PE_001286	9161718	3000	9161522;9161913;392
chr4	9285694	9288694	PE_001287	9287194	3000	9286948;9287439;492
chr4	9423170	9426170	PE_001288	9424670	3000	9424629;9424711;83
chr4	9458034	9461034	PE_001289	9459534	3000	9459410;9459658;249
chr4	9497730	9500730	PE_001290	9499230	3000	9499025;9499435;411
chr4	9564973	9567973	PE_001291	9566473	3000	9566425;9566521;97
chr4	9565342	9568342	PE_001292	9566842	3000	9566766;9566917;152
chr4	9565558	9568558	PE_001293	9567058	3000	9566987;9567128;142
chr4	9583968	9586968	PE_001294	9585468	3000	9585312;9585623;312
chr4	9659414	9662414	PE_001295	9660914	3000	9660725;9661103;379
chr4	9707132	9710132	PE_001296	9708632	3000	9708510;9708754;245
chr4	9719002	9722002	PE_001297	9720502	3000	9720321;9720682;362
chr4	9719486	9722486	PE_001298	9720986	3000	9720728;9721243;516
chr4	9872098	9875098	PE_001299	9873598	3000	9873263;9873932;670
chr4	10010772	10013772	PE_001300	10012272	3000	10012013;10012530;518
chr4	10011309	10014309	PE_001301	10012809	3000	10012662;10012955;294
chr4	10068200	10071200	PE_001302	10069700	3000	10069670;10069730;61
chr4	10077044	10080044	PE_001303	10078544	3000	10078322;10078765;444
chr4	10298262	10301262	PE_001304	10299762	3000	10299728;10299796;69
chr4	10354299	10357299	PE_001305	10355799	3000	10355422;10356175;754
chr4	10581036	10584036	PE_001306	10582536	3000	10582398;10582673;276
chr4	10663677	10666677	PE_001307	10665177	3000	10665027;10665327;301
chr4	10668952	10671952	PE_001308	10670452	3000	10670334;10670570;237
chr4	10816482	10819482	PE_001309	10817982	3000	10817882;10818081;200
chr4	10962457	10965457	PE_001310	10963957	3000	10963771;10964142;372
chr4	10962832	10965832	PE_001311	10964332	3000	10964263;10964400;138
chr4	10978190	10981190	PE_001312	10979690	3000	10979483;10979896;414
chr4	10980999	10983999	PE_001313	10982499	3000	10982482;10982516;35
chr4	10986479	10989479	PE_001314	10987979	3000	10987800;10988158;359
chr4	11184595	11187595	PE_001315	11186095	3000	11185949;11186241;293
chr4	11196614	11199614	PE_001316	11198114	3000	11197973;11198255;283
chr4	11204334	11207334	PE_001317	11205834	3000	11205792;11205875;84
chr4	11204790	11207790	PE_001318	11206290	3000	11206109;11206471;363
chr4	11246439	11249439	PE_001319	11247939	3000	11247843;11248035;193
chr4	11344284	11347284	PE_001320	11345784	3000	11345507;11346060;554
chr4	11345071	11348071	PE_001321	11346571	3000	11346558;11346583;26
chr4	11385931	11388931	PE_001322	11387431	3000	11387330;11387531;202
chr4	11489986	11492986	PE_001323	11491486	3000	11491145;11491826;682
chr4	11531353	11534353	PE_001324	11532853	3000	11532827;11532879;53
chr4	11573936	11576936	PE_001325	11575436	3000	11575215;11575656;442
chr4	11714242	11717242	PE_001326	11715742	3000	11715656;11715828;173
chr4	11718184	11721184	PE_001327	11719684	3000	11719494;11719873;380
chr4	11721989	11724989	PE_001328	11723489	3000	11723320;11723657;338
chr4	11745305	11748305	PE_001329	11746805	3000	11746646;11746963;318
chr4	11768042	11771042	PE_001330	11769542	3000	11769358;11769726;369
chr4	11776852	11779852	PE_001331	11778352	3000	11778150;11778553;404
chr4	11785948	11788948	PE_001332	11787448	3000	11787361;11787535;175
chr4	11813785	11816785	PE_001333	11815285	3000	11815075;11815495;421
chr4	11919588	11922588	PE_001334	11921088	3000	11920989;11921186;198
chr4	12028404	12031404	PE_001335	12029904	3000	12029748;12030060;313
chr4	12082744	12085744	PE_001336	12084244	3000	12083935;12084552;618
chr4	12146706	12149706	PE_001337	12148206	3000	12147919;12148493;575
chr4	12368068	12371068	PE_001338	12369568	3000	12369188;12369947;760
chr4	12402031	12405031	PE_001339	12403531	3000	12403232;12403829;598
chr4	12410738	12413738	PE_001340	12412238	3000	12411851;12412624;774
chr4	12453958	12456958	PE_001341	12455458	3000	12455280;12455636;357
chr4	12482278	12485278	PE_001342	12483778	3000	12483729;12483827;99
chr4	12518095	12521095	PE_001343	12519595	3000	12519456;12519733;278
chr4	12535320	12538320	PE_001344	12536820	3000	12536251;12537388;1138
chr4	12619296	12622296	PE_001345	12620796	3000	12620725;12620866;142
chr4	12625098	12628098	PE_001346	12626598	3000	12626412;12626784;373
chr4	12641248	12644248	PE_001347	12642748	3000	12642492;12643003;512
chr4	12659241	12662241	PE_001348	12660741	3000	12660489;12660993;505
chr4	12660329	12663329	PE_001349	12661829	3000	12661599;12662059;461
chr4	12677422	12680422	PE_001350	12678922	3000	12678669;12679175;507
chr4	12693115	12696115	PE_001351	12694615	3000	12694482;12694748;267
chr4	12693385	12696385	PE_001352	12694885	3000	12694876;12694893;18
chr4	12738405	12741405	PE_001353	12739905	3000	12739795;12740015;221
chr4	12901785	12904785	PE_001354	12903285	3000	12903009;12903561;553
chr4	12905422	12908422	PE_001355	12906922	3000	12906839;12907005;167
chr4	12906211	12909211	PE_001356	12907711	3000	12907367;12908054;688
chr4	12910343	12913343	PE_001357	12911843	3000	12911825;12911861;37
chr4	12928813	12931813	PE_001358	12930313	3000	12930105;12930521;417
chr4	12935440	12938440	PE_001359	12936940	3000	12936631;12937248;618
chr4	12999216	13002216	PE_001360	13000716	3000	13000431;13001000;570
chr4	13045483	13048483	PE_001361	13046983	3000	13046946;13047020;75
chr4	13050069	13053069	PE_001362	13051569	3000	13051414;13051724;311
chr4	13065447	13068447	PE_001363	13066947	3000	13066652;13067241;590
chr4	13125864	13128864	PE_001364	13127364	3000	13127335;13127392;58
chr4	13126742	13129742	PE_001365	13128242	3000	13127804;13128680;877
chr4	13202623	13205623	PE_001366	13204123	3000	13203971;13204275;305
chr4	13226269	13229269	PE_001367	13227769	3000	13227511;13228027;517
chr4	13340136	13343136	PE_001368	13341636	3000	13341561;13341711;151
chr4	13358264	13361264	PE_001369	13359764	3000	13359752;13359776;25
chr4	13365821	13368821	PE_001370	13367321	3000	13367305;13367336;32
chr4	13446987	13449987	PE_001371	13448487	3000	13448200;13448773;574
chr4	13474056	13477056	PE_001372	13475556	3000	13475378;13475734;357
chr4	13526129	13529129	PE_001373	13527629	3000	13527620;13527637;18
chr4	13553048	13556048	PE_001374	13554548	3000	13554120;13554976;857
chr4	13565076	13568076	PE_001375	13566576	3000	13566570;13566582;13
chr4	13566938	13569938	PE_001376	13568438	3000	13568181;13568694;514
chr4	13632289	13635289	PE_001377	13633789	3000	13633538;13634040;503
chr4	13721784	13724784	PE_001378	13723284	3000	13723100;13723468;369
chr4	13835291	13838291	PE_001379	13836791	3000	13836332;13837249;918
chr4	13919317	13922317	PE_001380	13920817	3000	13920225;13921408;1184
chr4	14015401	14018401	PE_001381	14016901	3000	14016712;14017090;379
chr4	14039972	14042972	PE_001382	14041472	3000	14041331;14041613;283
chr4	14041896	14044896	PE_001383	14043396	3000	14043143;14043648;506
chr4	14131227	14134227	PE_001384	14132727	3000	14132714;14132739;26
chr4	14131512	14134512	PE_001385	14133012	3000	14132965;14133059;95
chr4	14136652	14139652	PE_001386	14138152	3000	14137988;14138316;329
chr4	14226818	14229818	PE_001387	14228318	3000	14228114;14228521;408
chr4	14248155	14251155	PE_001388	14249655	3000	14249570;14249740;171
chr4	14257266	14260266	PE_001389	14258766	3000	14258622;14258910;289
chr4	14261887	14264887	PE_001390	14263387	3000	14263226;14263548;323
chr4	14313138	14316138	PE_001391	14314638	3000	14314563;14314712;150
chr4	14387975	14390975	PE_001392	14389475	3000	14389407;14389542;136
chr4	14574322	14577322	PE_001393	14575822	3000	14575694;14575950;257
chr4	14591211	14594211	PE_001394	14592711	3000	14592643;14592779;137
chr4	14591356	14594356	PE_001395	14592856	3000	14592828;14592883;56
chr4	14707135	14710135	PE_001396	14708635	3000	14708435;14708834;400
chr4	14710246	14713246	PE_001397	14711746	3000	14711586;14711905;320
chr4	14719179	14722179	PE_001398	14720679	3000	14720614;14720743;130
chr4	14785285	14788285	PE_001399	14786785	3000	14786587;14786983;397
chr4	14928948	14931948	PE_001400	14930448	3000	14930142;14930754;613
chr4	14956576	14959576	PE_001401	14958076	3000	14957950;14958202;253
chr4	14991479	14994479	PE_001402	14992979	3000	14992920;14993038;119
chr4	15015994	15018994	PE_001403	15017494	3000	15017350;15017637;288
chr4	15026834	15029834	PE_001404	15028334	3000	15028131;15028537;407
chr4	15043844	15046844	PE_001405	15045344	3000	15045210;15045477;268
chr4	15109282	15112282	PE_001406	15110782	3000	15110614;15110950;337
chr4	15157548	15160548	PE_001407	15159048	3000	15159032;15159063;32
chr4	15157708	15160708	PE_001408	15159208	3000	15159155;15159260;106
chr4	15307785	15310785	PE_001409	15309285	3000	15309051;15309518;468
chr4	15313755	15316755	PE_001410	15315255	3000	15315127;15315382;256
chr4	15328836	15331836	PE_001411	15330336	3000	15330083;15330589;507
chr4	15329475	15332475	PE_001412	15330975	3000	15330826;15331124;299
chr4	15377849	15380849	PE_001413	15379349	3000	15379249;15379448;200
chr4	15442246	15445246	PE_001414	15443746	3000	15443329;15444163;835
chr4	15547144	15550144	PE_001415	15548644	3000	15548523;15548764;242
chr4	15586797	15589797	PE_001416	15588297	3000	15588117;15588477;361
chr4	15623170	15626170	PE_001417	15624670	3000	15624420;15624920;501
chr4	15639413	15642413	PE_001418	15640913	3000	15640486;15641340;855
chr4	15734140	15737140	PE_001419	15735640	3000	15735621;15735658;38
chr4	15736028	15739028	PE_001420	15737528	3000	15737394;15737661;268
chr4	15805392	15808392	PE_001421	15806892	3000	15806870;15806913;44
chr4	15853239	15856239	PE_001422	15854739	3000	15854572;15854905;334
chr4	15877087	15880087	PE_001423	15878587	3000	15878534;15878640;107
chr4	15885744	15888744	PE_001424	15887244	3000	15886673;15887814;1142
chr4	15986846	15989846	PE_001425	15988346	3000	15988103;15988589;487
chr4	16045401	16048401	PE_001426	16046901	3000	16046762;16047039;278
chr4	16047896	16050896	PE_001427	16049396	3000	16049218;16049574;357
chr4	16132269	16135269	PE_001428	16133769	3000	16133648;16133889;242
chr4	16235111	16238111	PE_001429	16236611	3000	16236502;16236720;219
chr4	16302541	16305541	PE_001430	16304041	3000	16303805;16304276;472
chr4	16391921	16394921	PE_001431	16393421	3000	16392831;16394011;1181
chr4	16443539	16446539	PE_001432	16445039	3000	16444853;16445225;373
chr4	16475497	16478497	PE_001433	16476997	3000	16476575;16477418;844
chr4	16512928	16515928	PE_001434	16514428	3000	16514243;16514612;370
chr4	16663194	16666194	PE_001435	16664694	3000	16664484;16664903;420
chr4	16744500	16747500	PE_001436	16746000	3000	16745733;16746267;535
chr4	16747160	16750160	PE_001437	16748660	3000	16748412;16748907;496
chr4	16753684	16756684	PE_001438	16755184	3000	16755148;16755219;72
chr4	16787498	16790498	PE_001439	16788998	3000	16788281;16789715;1435
chr4	16847693	16850693	PE_001440	16849193	3000	16848876;16849509;634
chr4	16880528	16883528	PE_001441	16882028	3000	16881749;16882306;558
chr4	16921642	16924642	PE_001442	16923142	3000	16922938;16923345;408
chr4	17026532	17029532	PE_001443	17028032	3000	17027854;17028209;356
chr4	17082049	17085049	PE_001444	17083549	3000	17083348;17083750;403
chr4	17090887	17093887	PE_001445	17092387	3000	17092225;17092548;324
chr4	17128044	17131044	PE_001446	17129544	3000	17129464;17129624;161
chr4	17167827	17170827	PE_001447	17169327	3000	17169026;17169628;603
chr4	17175077	17178077	PE_001448	17176577	3000	17176404;17176749;346
chr4	17199376	17202376	PE_001449	17200876	3000	17200785;17200967;183
chr4	17220084	17223084	PE_001450	17221584	3000	17221414;17221753;340
chr4	17228825	17231825	PE_001451	17230325	3000	17230106;17230543;438
chr4	17261839	17264839	PE_001452	17263339	3000	17262977;17263700;724
chr4	17270223	17273223	PE_001453	17271723	3000	17271469;17271977;509
chr4	17432387	17435387	PE_001454	17433887	3000	17433842;17433931;90
chr4	17490734	17493734	PE_001455	17492234	3000	17492153;17492315;163
chr4	17723671	17726671	PE_001456	17725171	3000	17724958;17725383;426
chr4	17745541	17748541	PE_001457	17747041	3000	17746701;17747381;681
chr4	17801290	17804290	PE_001458	17802790	3000	17802465;17803114;650
chr4	17822612	17825612	PE_001459	17824112	3000	17824074;17824150;77
chr4	17823279	17826279	PE_001460	17824779	3000	17824526;17825031;506
chr4	17878511	17881511	PE_001461	17880011	3000	17879983;17880039;57
chr4	17951947	17954947	PE_001462	17953447	3000	17953386;17953507;122
chr4	17956355	17959355	PE_001463	17957855	3000	17957706;17958004;299
chr4	17956741	17959741	PE_001464	17958241	3000	17958087;17958395;309
chr4	17969782	17972782	PE_001465	17971282	3000	17971081;17971483;403
chr4	18008907	18011907	PE_001466	18010407	3000	18010307;18010506;200
chr4	18231872	18234872	PE_001467	18233372	3000	18233042;18233702;661
chr4	18307366	18310366	PE_001468	18308866	3000	18308686;18309046;361
chr4	18327142	18330142	PE_001469	18328642	3000	18328301;18328982;682
chr4	18354048	18357048	PE_001470	18355548	3000	18355189;18355907;719
chr4	18369422	18372422	PE_001471	18370922	3000	18370411;18371432;1022
chr4	18370591	18373591	PE_001472	18372091	3000	18372073;18372109;37
chr4	18370751	18373751	PE_001473	18372251	3000	18372215;18372287;73
chr4	18408564	18411564	PE_001474	18410064	3000	18409785;18410342;558
chr4	18498954	18501954	PE_001475	18500454	3000	18500355;18500552;198
chr4	18550962	18553962	PE_001476	18552462	3000	18552169;18552755;587
chr4	18551772	18554772	PE_001477	18553272	3000	18553002;18553541;540
chr5	174874	177874	PE_001478	176374	3000	176113;176635;523
chr5	203905	206905	PE_001479	205405	3000	205227;205583;357
chr5	266273	269273	PE_001480	267773	3000	267724;267821;98
chr5	363517	366517	PE_001481	365017	3000	364686;365348;663
chr5	410456	413456	PE_001482	411956	3000	411804;412107;304
chr5	411267	414267	PE_001483	412767	3000	412692;412842;151
chr5	411888	414888	PE_001484	413388	3000	413189;413586;398
chr5	528948	531948	PE_001485	530448	3000	530280;530615;336
chr5	559633	562633	PE_001486	561133	3000	560967;561299;333
chr5	623168	626168	PE_001487	624668	3000	624473;624862;390
chr5	680587	683587	PE_001488	682087	3000	682052;682121;70
chr5	703041	706041	PE_001489	704541	3000	704134;704948;815
chr5	716678	719678	PE_001490	718178	3000	717956;718399;444
chr5	790710	793710	PE_001491	792210	3000	792176;792243;68
chr5	790914	793914	PE_001492	792414	3000	792339;792488;150
chr5	874030	877030	PE_001493	875530	3000	875384;875676;293
chr5	920371	923371	PE_001494	921871	3000	921664;922078;415
chr5	982825	985825	PE_001495	984325	3000	984138;984511;374
chr5	1009155	1012155	PE_001496	1010655	3000	1010493;1010816;324
chr5	1016785	1019785	PE_001497	1018285	3000	1018074;1018495;422
chr5	1091648	1094648	PE_001498	1093148	3000	1092868;1093428;561
chr5	1201601	1204601	PE_001499	1203101	3000	1202692;1203509;818
chr5	1316438	1319438	PE_001500	1317938	3000	1317878;1317997;120
chr5	1328631	1331631	PE_001501	1330131	3000	1329962;1330300;339
chr5	1427013	1430013	PE_001502	1428513	3000	1428386;1428639;254
chr5	1448453	1451453	PE_001503	1449953	3000	1449806;1450100;295
chr5	1513539	1516539	PE_001504	1515039	3000	1515006;1515072;67
chr5	1527721	1530721	PE_001505	1529221	3000	1529147;1529294;148
chr5	1528376	1531376	PE_001506	1529876	3000	1529717;1530034;318
chr5	1528988	1531988	PE_001507	1530488	3000	1530220;1530756;537
chr5	1537180	1540180	PE_001508	1538680	3000	1538543;1538816;274
chr5	1574827	1577827	PE_001509	1576327	3000	1576253;1576400;148
chr5	1575264	1578264	PE_001510	1576764	3000	1576471;1577056;586
chr5	1600541	1603541	PE_001511	1602041	3000	1601793;1602289;497
chr5	1613913	1616913	PE_001512	1615413	3000	1615209;1615616;408
chr5	1680633	1683633	PE_001513	1682133	3000	1681908;1682357;450
chr5	1701027	1704027	PE_001514	1702527	3000	1702226;1702828;603
chr5	1784293	1787293	PE_001515	1785793	3000	1785634;1785951;318
chr5	1836467	1839467	PE_001516	1837967	3000	1837885;1838048;164
chr5	1851117	1854117	PE_001517	1852617	3000	1852475;1852758;284
chr5	1860275	1863275	PE_001518	1861775	3000	1861641;1861908;268
chr5	1954152	1957152	PE_001519	1955652	3000	1955461;1955843;383
chr5	1987703	1990703	PE_001520	1989203	3000	1989194;1989211;18
chr5	1988299	1991299	PE_001521	1989799	3000	1989413;1990184;772
chr5	2086343	2089343	PE_001522	2087843	3000	2087566;2088119;554
chr5	2111251	2114251	PE_001523	2112751	3000	2112617;2112884;268
chr5	2125388	2128388	PE_001524	2126888	3000	2126500;2127275;776
chr5	2156265	2159265	PE_001525	2157765	3000	2157659;2157871;213
chr5	2210161	2213161	PE_001526	2211661	3000	2211579;2211742;164
chr5	2226202	2229202	PE_001527	2227702	3000	2227323;2228080;758
chr5	2282103	2285103	PE_001528	2283603	3000	2283395;2283811;417
chr5	2282688	2285688	PE_001529	2284188	3000	2283998;2284377;380
chr5	2296952	2299952	PE_001530	2298452	3000	2298395;2298508;114
chr5	2400451	2403451	PE_001531	2401951	3000	2401855;2402047;193
chr5	2477893	2480893	PE_001532	2479393	3000	2479259;2479526;268
chr5	2497167	2500167	PE_001533	2498667	3000	2498421;2498913;493
chr5	2501530	2504530	PE_001534	2503030	3000	2502594;2503465;872
chr5	2546240	2549240	PE_001535	2547740	3000	2547707;2547772;66
chr5	2546754	2549754	PE_001536	2548254	3000	2548197;2548310;114
chr5	2547386	2550386	PE_001537	2548886	3000	2548497;2549275;779
chr5	2553009	2556009	PE_001538	2554509	3000	2554490;2554528;39
chr5	2570351	2573351	PE_001539	2571851	3000	2571647;2572054;408
chr5	2670328	2673328	PE_001540	2671828	3000	2671630;2672025;396
chr5	2693208	2696208	PE_001541	2694708	3000	2694550;2694865;316
chr5	2726019	2729019	PE_001542	2727519	3000	2727168;2727870;703
chr5	2741910	2744910	PE_001543	2743410	3000	2743075;2743744;670
chr5	2758587	2761587	PE_001544	2760087	3000	2760049;2760124;76
chr5	2784658	2787658	PE_001545	2786158	3000	2785943;2786372;430
chr5	2796228	2799228	PE_001546	2797728	3000	2797417;2798039;623
chr5	2826978	2829978	PE_001547	2828478	3000	2828406;2828549;144
chr5	2827372	2830372	PE_001548	2828872	3000	2828603;2829140;538
chr5	2861124	2864124	PE_001549	2862624	3000	2862332;2862915;584
chr5	2890669	2893669	PE_001550	2892169	3000	2892049;2892289;241
chr5	2891237	2894237	PE_001551	2892737	3000	2892639;2892835;197
chr5	2891621	2894621	PE_001552	2893121	3000	2893001;2893240;240
chr5	2965527	2968527	PE_001553	2967027	3000	2966823;2967231;409
chr5	2968934	2971934	PE_001554	2970434	3000	2970265;2970602;338
chr5	3060550	3063550	PE_001555	3062050	3000	3061921;3062179;259
chr5	3076983	3079983	PE_001556	3078483	3000	3078373;3078593;221
chr5	3215158	3218158	PE_001557	3216658	3000	3216349;3216966;618
chr5	3233732	3236732	PE_001558	3235232	3000	3235084;3235379;296
chr5	3316663	3319663	PE_001559	3318163	3000	3317773;3318552;780
chr5	3411368	3414368	PE_001560	3412868	3000	3412689;3413046;358
chr5	3422982	3425982	PE_001561	3424482	3000	3424172;3424792;621
chr5	3466708	3469708	PE_001562	3468208	3000	3468086;3468330;245
chr5	3518476	3521476	PE_001563	3519976	3000	3519898;3520054;157
chr5	3518848	3521848	PE_001564	3520348	3000	3520216;3520479;264
chr5	3555447	3558447	PE_001565	3556947	3000	3556621;3557273;653
chr5	3569287	3572287	PE_001566	3570787	3000	3570649;3570925;277
chr5	3604787	3607787	PE_001567	3606287	3000	3606000;3606574;575
chr5	3607539	3610539	PE_001568	3609039	3000	3608759;3609319;561
chr5	3608010	3611010	PE_001569	3609510	3000	3609436;3609584;149
chr5	3632078	3635078	PE_001570	3633578	3000	3633386;3633770;385
chr5	3661114	3664114	PE_001571	3662614	3000	3662347;3662881;535
chr5	3677956	3680956	PE_001572	3679456	3000	3679022;3679889;868
chr5	3699993	3702993	PE_001573	3701493	3000	3701337;3701649;313
chr5	3719863	3722863	PE_001574	3721363	3000	3721318;3721407;90
chr5	3720335	3723335	PE_001575	3721835	3000	3721707;3721962;256
chr5	3781562	3784562	PE_001576	3783062	3000	3782877;3783247;371
chr5	3823958	3826958	PE_001577	3825458	3000	3825291;3825625;335
chr5	3914329	3917329	PE_001578	3915829	3000	3915592;3916065;474
chr5	4002960	4005960	PE_001579	4004460	3000	4004422;4004498;77
chr5	4003169	4006169	PE_001580	4004669	3000	4004599;4004739;141
chr5	4003715	4006715	PE_001581	4005215	3000	4005095;4005334;240
chr5	4004110	4007110	PE_001582	4005610	3000	4005539;4005681;143
chr5	4004749	4007749	PE_001583	4006249	3000	4006126;4006372;247
chr5	4005099	4008099	PE_001584	4006599	3000	4006495;4006702;208
chr5	4005587	4008587	PE_001585	4007087	3000	4007012;4007162;151
chr5	4006021	4009021	PE_001586	4007521	3000	4007388;4007654;267
chr5	4006939	4009939	PE_001587	4008439	3000	4007771;4009106;1336
chr5	4080667	4083667	PE_001588	4082167	3000	4081993;4082341;349
chr5	4100476	4103476	PE_001589	4101976	3000	4101759;4102193;435
chr5	4108703	4111703	PE_001590	4110203	3000	4109712;4110694;983
chr5	4160093	4163093	PE_001591	4161593	3000	4161546;4161639;94
chr5	4160572	4163572	PE_001592	4162072	3000	4161777;4162367;591
chr5	4178435	4181435	PE_001593	4179935	3000	4179599;4180270;672
chr5	4215659	4218659	PE_001594	4217159	3000	4216728;4217589;862
chr5	4297842	4300842	PE_001595	4299342	3000	4299085;4299598;514
chr5	4303691	4306691	PE_001596	4305191	3000	4305150;4305232;83
chr5	4333697	4336697	PE_001597	4335197	3000	4334840;4335553;714
chr5	4352964	4355964	PE_001598	4354464	3000	4354391;4354536;146
chr5	4353648	4356648	PE_001599	4355148	3000	4354882;4355413;532
chr5	4369152	4372152	PE_001600	4370652	3000	4370337;4370967;631
chr5	4394448	4397448	PE_001601	4395948	3000	4395926;4395970;45
chr5	4421991	4424991	PE_001602	4423491	3000	4422902;4424079;1178
chr5	4449560	4452560	PE_001603	4451060	3000	4450844;4451275;432
chr5	4463131	4466131	PE_001604	4464631	3000	4464344;4464918;575
chr5	4475610	4478610	PE_001605	4477110	3000	4476895;4477325;431
chr5	4494251	4497251	PE_001606	4495751	3000	4495175;4496327;1153
chr5	4563306	4566306	PE_001607	4564806	3000	4564539;4565072;534
chr5	4591834	4594834	PE_001608	4593334	3000	4593076;4593591;516
chr5	4663290	4666290	PE_001609	4664790	3000	4664410;4665169;760
chr5	4675308	4678308	PE_001610	4676808	3000	4676700;4676916;217
chr5	4857776	4860776	PE_001611	4859276	3000	4859156;4859396;241
chr5	4956811	4959811	PE_001612	4958311	3000	4958224;4958398;175
chr5	4996010	4999010	PE_001613	4997510	3000	4997323;4997696;374
chr5	4996410	4999410	PE_001614	4997910	3000	4997725;4998094;370
chr5	5008051	5011051	PE_001615	5009551	3000	5009402;5009700;299
chr5	5026046	5029046	PE_001616	5027546	3000	5027430;5027661;232
chr5	5113822	5116822	PE_001617	5115322	3000	5114992;5115651;660
chr5	5499889	5502889	PE_001618	5501389	3000	5501126;5501651;526
chr5	5515864	5518864	PE_001619	5517364	3000	5517234;5517494;261
chr5	5601281	5604281	PE_001620	5602781	3000	5602677;5602884;208
chr5	5641275	5644275	PE_001621	5642775	3000	5642479;5643071;593
chr5	5757033	5760033	PE_001622	5758533	3000	5758481;5758584;104
chr5	5757692	5760692	PE_001623	5759192	3000	5758774;5759609;836
chr5	5862768	5865768	PE_001624	5864268	3000	5863962;5864574;613
chr5	6019446	6022446	PE_001625	6020946	3000	6020670;6021221;552
chr5	6081652	6084652	PE_001626	6083152	3000	6083083;6083220;138
chr5	6256570	6259570	PE_001627	6258070	3000	6257896;6258244;349
chr5	6298172	6301172	PE_001628	6299672	3000	6299638;6299705;68
chr5	6343356	6346356	PE_001629	6344856	3000	6344760;6344952;193
chr5	6543361	6546361	PE_001630	6544861	3000	6544757;6544965;209
chr5	6543844	6546844	PE_001631	6545344	3000	6545150;6545537;388
chr5	6640374	6643374	PE_001632	6641874	3000	6641478;6642270;793
chr5	6640842	6643842	PE_001633	6642342	3000	6642307;6642377;71
chr5	6657006	6660006	PE_001634	6658506	3000	6658084;6658928;845
chr5	6688765	6691765	PE_001635	6690265	3000	6690157;6690373;217
chr5	6693748	6696748	PE_001636	6695248	3000	6694941;6695555;615
chr5	6879971	6882971	PE_001637	6881471	3000	6881266;6881675;410
chr5	6897354	6900354	PE_001638	6898854	3000	6898830;6898877;48
chr5	6971488	6974488	PE_001639	6972988	3000	6972970;6973005;36
chr5	6989982	6992982	PE_001640	6991482	3000	6991200;6991764;565
chr5	7126933	7129933	PE_001641	7128433	3000	7128249;7128617;369
chr5	7156869	7159869	PE_001642	7158369	3000	7158359;7158378;20
chr5	7180468	7183468	PE_001643	7181968	3000	7181771;7182165;395
chr5	7197235	7200235	PE_001644	7198735	3000	7198435;7199034;600
chr5	7389047	7392047	PE_001645	7390547	3000	7390378;7390716;339
chr5	7473253	7476253	PE_001646	7474753	3000	7474388;7475117;730
chr5	7478493	7481493	PE_001647	7479993	3000	7479845;7480141;297
chr5	7911964	7914964	PE_001648	7913464	3000	7913191;7913736;546
chr5	7912450	7915450	PE_001649	7913950	3000	7913927;7913972;46
chr5	7914401	7917401	PE_001650	7915901	3000	7915550;7916252;703
chr5	7925636	7928636	PE_001651	7927136	3000	7926949;7927323;375
chr5	8020681	8023681	PE_001652	8022181	3000	8021954;8022407;454
chr5	8044958	8047958	PE_001653	8046458	3000	8046315;8046600;286
chr5	8046272	8049272	PE_001654	8047772	3000	8047744;8047800;57
chr5	8046936	8049936	PE_001655	8048436	3000	8048113;8048758;646
chr5	8066645	8069645	PE_001656	8068145	3000	8067931;8068358;428
chr5	8233209	8236209	PE_001657	8234709	3000	8234450;8234967;518
chr5	8269372	8272372	PE_001658	8270872	3000	8270614;8271130;517
chr5	8274848	8277848	PE_001659	8276348	3000	8276248;8276448;201
chr5	8302807	8305807	PE_001660	8304307	3000	8304270;8304343;74
chr5	8454508	8457508	PE_001661	8456008	3000	8455982;8456033;52
chr5	8496084	8499084	PE_001662	8497584	3000	8497311;8497856;546
chr5	8737962	8740962	PE_001663	8739462	3000	8739276;8739647;372
chr5	8866261	8869261	PE_001664	8867761	3000	8867558;8867963;406
chr5	8868429	8871429	PE_001665	8869929	3000	8869712;8870146;435
chr5	8886872	8889872	PE_001666	8888372	3000	8888322;8888421;100
chr5	8900285	8903285	PE_001667	8901785	3000	8901680;8901890;211
chr5	8904811	8907811	PE_001668	8906311	3000	8906229;8906392;164
chr5	8910615	8913615	PE_001669	8912115	3000	8911912;8912317;406
chr5	8971550	8974550	PE_001670	8973050	3000	8972918;8973182;265
chr5	8981433	8984433	PE_001671	8982933	3000	8982773;8983092;320
chr5	9292612	9295612	PE_001672	9294112	3000	9294081;9294143;63
chr5	9293460	9296460	PE_001673	9294960	3000	9294769;9295150;382
chr5	9514172	9517172	PE_001674	9515672	3000	9515336;9516007;672
chr5	9531213	9534213	PE_001675	9532713	3000	9532691;9532735;45
chr5	9538726	9541726	PE_001676	9540226	3000	9540167;9540284;118
chr5	9576734	9579734	PE_001677	9578234	3000	9577902;9578566;665
chr5	9582491	9585491	PE_001678	9583991	3000	9583925;9584057;133
chr5	9762580	9765580	PE_001679	9764080	3000	9763895;9764264;370
chr5	9976789	9979789	PE_001680	9978289	3000	9977967;9978610;644
chr5	10161158	10164158	PE_001681	10162658	3000	10162502;10162814;313
chr5	10637914	10640914	PE_001682	10639414	3000	10639173;10639654;482
chr5	11612946	11615946	PE_001683	11614446	3000	11614313;11614578;266
chr5	13106313	13109313	PE_001684	13107813	3000	13107661;13107965;305
chr5	13831745	13834745	PE_001685	13833245	3000	13832779;13833710;932
chr5	14117239	14120239	PE_001686	14118739	3000	14118171;14119306;1136
chr5	14597035	14600035	PE_001687	14598535	3000	14598334;14598736;403
chr5	14632818	14635818	PE_001688	14634318	3000	14633910;14634725;816
chr5	15179550	15182550	PE_001689	15181050	3000	15180962;15181138;177
chr5	15441424	15444424	PE_001690	15442924	3000	15442813;15443035;223
chr5	15471350	15474350	PE_001691	15472850	3000	15472677;15473022;346
chr5	15513272	15516272	PE_001692	15514772	3000	15514354;15515189;836
chr5	15749320	15752320	PE_001693	15750820	3000	15750625;15751014;390
chr5	15904211	15907211	PE_001694	15905711	3000	15905500;15905921;422
chr5	15930753	15933753	PE_001695	15932253	3000	15931914;15932592;679
chr5	15974706	15977706	PE_001696	15976206	3000	15975889;15976522;634
chr5	15996334	15999334	PE_001697	15997834	3000	15997716;15997951;236
chr5	16024546	16027546	PE_001698	16026046	3000	16025849;16026243;395
chr5	16074879	16077879	PE_001699	16076379	3000	16075982;16076775;794
chr5	16078290	16081290	PE_001700	16079790	3000	16079747;16079832;86
chr5	16080376	16083376	PE_001701	16081876	3000	16081774;16081978;205
chr5	16167483	16170483	PE_001702	16168983	3000	16168782;16169183;402
chr5	16170135	16173135	PE_001703	16171635	3000	16171531;16171738;208
chr5	16362367	16365367	PE_001704	16363867	3000	16363816;16363917;102
chr5	16395648	16398648	PE_001705	16397148	3000	16396994;16397301;308
chr5	16397757	16400757	PE_001706	16399257	3000	16399180;16399333;154
chr5	16471138	16474138	PE_001707	16472638	3000	16472457;16472819;363
chr5	16566080	16569080	PE_001708	16567580	3000	16567430;16567730;301
chr5	16644588	16647588	PE_001709	16646088	3000	16645638;16646538;901
chr5	16647681	16650681	PE_001710	16649181	3000	16648993;16649369;377
chr5	16719598	16722598	PE_001711	16721098	3000	16720970;16721225;256
chr5	16721138	16724138	PE_001712	16722638	3000	16722508;16722768;261
chr5	16731133	16734133	PE_001713	16732633	3000	16732425;16732841;417
chr5	16731505	16734505	PE_001714	16733005	3000	16732894;16733116;223
chr5	16906534	16909534	PE_001715	16908034	3000	16907883;16908184;302
chr5	16924985	16927985	PE_001716	16926485	3000	16926314;16926655;342
chr5	16959731	16962731	PE_001717	16961231	3000	16961086;16961375;290
chr5	17001037	17004037	PE_001718	17002537	3000	17002512;17002561;50
chr5	17070467	17073467	PE_001719	17071967	3000	17071481;17072452;972
chr5	17120525	17123525	PE_001720	17122025	3000	17121862;17122187;326
chr5	17157361	17160361	PE_001721	17158861	3000	17158645;17159077;433
chr5	17316609	17319609	PE_001722	17318109	3000	17318091;17318126;36
chr5	17322359	17325359	PE_001723	17323859	3000	17323585;17324132;548
chr5	17391071	17394071	PE_001724	17392571	3000	17392266;17392876;611
chr5	17504301	17507301	PE_001725	17505801	3000	17505729;17505873;145
chr5	17513984	17516984	PE_001726	17515484	3000	17515165;17515803;639
chr5	17655141	17658141	PE_001727	17656641	3000	17656465;17656817;353
chr5	17679515	17682515	PE_001728	17681015	3000	17680964;17681065;102
chr5	17679878	17682878	PE_001729	17681378	3000	17681214;17681542;329
chr5	17696319	17699319	PE_001730	17697819	3000	17697633;17698004;372
chr5	17838992	17841992	PE_001731	17840492	3000	17840405;17840579;175
chr5	17947017	17950017	PE_001732	17948517	3000	17948435;17948598;164
chr5	17947353	17950353	PE_001733	17948853	3000	17948841;17948865;25
chr5	18081568	18084568	PE_001734	18083068	3000	18082700;18083435;736
chr5	18136847	18139847	PE_001735	18138347	3000	18138320;18138374;55
chr5	18173617	18176617	PE_001736	18175117	3000	18175089;18175144;56
chr5	18175563	18178563	PE_001737	18177063	3000	18176728;18177398;671
chr5	18315984	18318984	PE_001738	18317484	3000	18317238;18317729;492
chr5	18316315	18319315	PE_001739	18317815	3000	18317799;18317830;32
chr5	18354581	18357581	PE_001740	18356081	3000	18356059;18356102;44
chr5	18456299	18459299	PE_001741	18457799	3000	18457662;18457935;274
chr5	18568454	18571454	PE_001742	18569954	3000	18569811;18570097;287
chr5	18572671	18575671	PE_001743	18574171	3000	18574028;18574313;286
chr5	18706016	18709016	PE_001744	18707516	3000	18707417;18707614;198
chr5	18729929	18732929	PE_001745	18731429	3000	18731345;18731512;168
chr5	18772362	18775362	PE_001746	18773862	3000	18773628;18774095;468
chr5	18772657	18775657	PE_001747	18774157	3000	18774117;18774196;80
chr5	18794232	18797232	PE_001748	18795732	3000	18795576;18795888;313
chr5	18811653	18814653	PE_001749	18813153	3000	18813028;18813278;251
chr5	18821513	18824513	PE_001750	18823013	3000	18822955;18823071;117
chr5	19077997	19080997	PE_001751	19079497	3000	19078941;19080052;1112
chr5	19258721	19261721	PE_001752	19260221	3000	19260164;19260278;115
chr5	19260215	19263215	PE_001753	19261715	3000	19261699;19261731;33
chr5	19269953	19272953	PE_001754	19271453	3000	19271008;19271897;890
chr5	19326106	19329106	PE_001755	19327606	3000	19327408;19327803;396
chr5	19336506	19339506	PE_001756	19338006	3000	19337653;19338359;707
chr5	19482459	19485459	PE_001757	19483959	3000	19483798;19484119;322
chr5	19609731	19612731	PE_001758	19611231	3000	19611198;19611263;66
chr5	19610376	19613376	PE_001759	19611876	3000	19611443;19612309;867
chr5	19614475	19617475	PE_001760	19615975	3000	19615672;19616277;606
chr5	19618808	19621808	PE_001761	19620308	3000	19620009;19620607;599
chr5	19627895	19630895	PE_001762	19629395	3000	19629275;19629514;240
chr5	19628332	19631332	PE_001763	19629832	3000	19629799;19629865;67
chr5	19634238	19637238	PE_001764	19635738	3000	19635481;19635994;514
chr5	19707731	19710731	PE_001765	19709231	3000	19709146;19709315;170
chr5	19721746	19724746	PE_001766	19723246	3000	19723170;19723322;153
chr5	19852269	19855269	PE_001767	19853769	3000	19853523;19854014;492
chr5	19856112	19859112	PE_001768	19857612	3000	19857588;19857636;49
chr5	19922655	19925655	PE_001769	19924155	3000	19923918;19924391;474
chr5	19930568	19933568	PE_001770	19932068	3000	19931853;19932283;431
chr5	19937046	19940046	PE_001771	19938546	3000	19938043;19939049;1007
chr5	20030907	20033907	PE_001772	20032407	3000	20032124;20032690;567
chr5	20035031	20038031	PE_001773	20036531	3000	20036188;20036873;686
chr5	20067488	20070488	PE_001774	20068988	3000	20068840;20069135;296
chr5	20244908	20247908	PE_001775	20246408	3000	20246291;20246524;234
chr5	20478039	20481039	PE_001776	20479539	3000	20479386;20479691;306
chr5	20740076	20743076	PE_001777	20741576	3000	20741331;20741820;490
chr5	20740535	20743535	PE_001778	20742035	3000	20741922;20742148;227
chr5	20757322	20760322	PE_001779	20758822	3000	20758725;20758918;194
chr5	20757690	20760690	PE_001780	20759190	3000	20759042;20759338;297
chr5	20807722	20810722	PE_001781	20809222	3000	20809021;20809422;402
chr5	20849007	20852007	PE_001782	20850507	3000	20850371;20850642;272
chr5	20959323	20962323	PE_001783	20960823	3000	20960671;20960975;305
chr5	21021337	21024337	PE_001784	21022837	3000	21022723;21022950;228
chr5	21031866	21034866	PE_001785	21033366	3000	21033177;21033554;378
chr5	21077568	21080568	PE_001786	21079068	3000	21078887;21079249;363
chr5	21079920	21082920	PE_001787	21081420	3000	21081277;21081563;287
chr5	21163658	21166658	PE_001788	21165158	3000	21164973;21165343;371
chr5	21235364	21238364	PE_001789	21236864	3000	21236434;21237293;860
chr5	21318174	21321174	PE_001790	21319674	3000	21319630;21319717;88
chr5	21318731	21321731	PE_001791	21320231	3000	21319872;21320589;718
chr5	21319802	21322802	PE_001792	21321302	3000	21320684;21321920;1237
chr5	21442973	21445973	PE_001793	21444473	3000	21444158;21444788;631
chr5	21556715	21559715	PE_001794	21558215	3000	21557974;21558455;482
chr5	21744659	21747659	PE_001795	21746159	3000	21746126;21746191;66
chr5	21820755	21823755	PE_001796	21822255	3000	21821862;21822647;786
chr5	21859542	21862542	PE_001797	21861042	3000	21860878;21861205;328
chr5	21867320	21870320	PE_001798	21868820	3000	21868718;21868921;204
chr5	21947462	21950462	PE_001799	21948962	3000	21948924;21948999;76
chr5	21966702	21969702	PE_001800	21968202	3000	21967877;21968527;651
chr5	21991517	21994517	PE_001801	21993017	3000	21992737;21993296;560
chr5	22129801	22132801	PE_001802	22131301	3000	22131192;22131409;218
chr5	22274741	22277741	PE_001803	22276241	3000	22276002;22276479;478
chr5	22285668	22288668	PE_001804	22287168	3000	22287084;22287251;168
chr5	22320478	22323478	PE_001805	22321978	3000	22321917;22322038;122
chr5	22325693	22328693	PE_001806	22327193	3000	22326956;22327430;475
chr5	22439599	22442599	PE_001807	22441099	3000	22440871;22441327;457
chr5	22440666	22443666	PE_001808	22442166	3000	22441994;22442338;345
chr5	22442070	22445070	PE_001809	22443570	3000	22443506;22443634;129
chr5	22458048	22461048	PE_001810	22459548	3000	22459352;22459744;393
chr5	22494610	22497610	PE_001811	22496110	3000	22495822;22496397;576
chr5	22526809	22529809	PE_001812	22528309	3000	22528129;22528488;360
chr5	22569714	22572714	PE_001813	22571214	3000	22570725;22571703;979
chr5	22592418	22595418	PE_001814	22593918	3000	22593792;22594044;253
chr5	22688419	22691419	PE_001815	22689919	3000	22689761;22690076;316
chr5	22719615	22722615	PE_001816	22721115	3000	22720850;22721379;530
chr5	22756675	22759675	PE_001817	22758175	3000	22757696;22758654;959
chr5	22790423	22793423	PE_001818	22791923	3000	22791850;22791996;147
chr5	22836531	22839531	PE_001819	22838031	3000	22837840;22838221;382
chr5	22849045	22852045	PE_001820	22850545	3000	22850516;22850573;58
chr5	22878890	22881890	PE_001821	22880390	3000	22880232;22880547;316
chr5	22970213	22973213	PE_001822	22971713	3000	22971489;22971936;448
chr5	23007371	23010371	PE_001823	23008871	3000	23008485;23009257;773
chr5	23104579	23107579	PE_001824	23106079	3000	23105939;23106219;281
chr5	23173995	23176995	PE_001825	23175495	3000	23175395;23175595;201
chr5	23234210	23237210	PE_001826	23235710	3000	23235499;23235920;422
chr5	23281927	23284927	PE_001827	23283427	3000	23283137;23283716;580
chr5	23373344	23376344	PE_001828	23374844	3000	23374671;23375016;346
chr5	23375677	23378677	PE_001829	23377177	3000	23376777;23377577;801
chr5	23390470	23393470	PE_001830	23391970	3000	23391688;23392251;564
chr5	23441185	23444185	PE_001831	23442685	3000	23442534;23442835;302
chr5	23442213	23445213	PE_001832	23443713	3000	23443335;23444090;756
chr5	23444423	23447423	PE_001833	23445923	3000	23445850;23445995;146
chr5	23501797	23504797	PE_001834	23503297	3000	23503275;23503318;44
chr5	23565670	23568670	PE_001835	23567170	3000	23566938;23567401;464
chr5	23570143	23573143	PE_001836	23571643	3000	23571307;23571978;672
chr5	23570791	23573791	PE_001837	23572291	3000	23572187;23572395;209
chr5	23574721	23577721	PE_001838	23576221	3000	23576044;23576397;354
chr5	23586637	23589637	PE_001839	23588137	3000	23587840;23588433;594
chr5	23850365	23853365	PE_001840	23851865	3000	23851719;23852011;293
chr5	23889024	23892024	PE_001841	23890524	3000	23890225;23890823;599
chr5	23899643	23902643	PE_001842	23901143	3000	23900808;23901478;671
chr5	23916693	23919693	PE_001843	23918193	3000	23917909;23918477;569
chr5	24028951	24031951	PE_001844	24030451	3000	24030238;24030663;426
chr5	24033633	24036633	PE_001845	24035133	3000	24035119;24035147;29
chr5	24034021	24037021	PE_001846	24035521	3000	24035461;24035581;121
chr5	24200009	24203009	PE_001847	24201509	3000	24201306;24201711;406
chr5	24202174	24205174	PE_001848	24203674	3000	24203492;24203856;365
chr5	24212086	24215086	PE_001849	24213586	3000	24213346;24213826;481
chr5	24214130	24217130	PE_001850	24215630	3000	24215447;24215813;367
chr5	24216377	24219377	PE_001851	24217877	3000	24217639;24218115;477
chr5	24349054	24352054	PE_001852	24350554	3000	24350134;24350973;840
chr5	24369295	24372295	PE_001853	24370795	3000	24370286;24371303;1018
chr5	24451767	24454767	PE_001854	24453267	3000	24452812;24453722;911
chr5	24452366	24455366	PE_001855	24453866	3000	24453819;24453912;94
chr5	24576796	24579796	PE_001856	24578296	3000	24578078;24578513;436
chr5	24577384	24580384	PE_001857	24578884	3000	24578657;24579110;454
chr5	24618443	24621443	PE_001858	24619943	3000	24619539;24620347;809
chr5	24620558	24623558	PE_001859	24622058	3000	24622019;24622096;78
chr5	24655411	24658411	PE_001860	24656911	3000	24656719;24657103;385
chr5	24745915	24748915	PE_001861	24747415	3000	24747196;24747634;439
chr5	24754907	24757907	PE_001862	24756407	3000	24756306;24756508;203
chr5	24792363	24795363	PE_001863	24793863	3000	24793550;24794176;627
chr5	24806788	24809788	PE_001864	24808288	3000	24808216;24808359;144
chr5	24809146	24812146	PE_001865	24810646	3000	24810640;24810652;13
chr5	24838210	24841210	PE_001866	24839710	3000	24839545;24839874;330
chr5	24858891	24861891	PE_001867	24860391	3000	24860166;24860616;451
chr5	24871700	24874700	PE_001868	24873200	3000	24872825;24873574;750
chr5	24876953	24879953	PE_001869	24878453	3000	24878138;24878767;630
chr5	25003371	25006371	PE_001870	25004871	3000	25004752;25004989;238
chr5	25098241	25101241	PE_001871	25099741	3000	25099466;25100016;551
chr5	25106510	25109510	PE_001872	25108010	3000	25107930;25108090;161
chr5	25147525	25150525	PE_001873	25149025	3000	25148613;25149436;824
chr5	25382253	25385253	PE_001874	25383753	3000	25383314;25384191;878
chr5	25391315	25394315	PE_001875	25392815	3000	25392640;25392989;350
chr5	25411854	25414854	PE_001876	25413354	3000	25413315;25413393;79
chr5	25453062	25456062	PE_001877	25454562	3000	25454291;25454832;542
chr5	25491429	25494429	PE_001878	25492929	3000	25492828;25493029;202
chr5	25501729	25504729	PE_001879	25503229	3000	25502707;25503751;1045
chr5	25535410	25538410	PE_001880	25536910	3000	25536568;25537252;685
chr5	25570056	25573056	PE_001881	25571556	3000	25571504;25571608;105
chr5	25580304	25583304	PE_001882	25581804	3000	25581526;25582082;557
chr5	25611672	25614672	PE_001883	25613172	3000	25613054;25613289;236
chr5	25614999	25617999	PE_001884	25616499	3000	25616320;25616677;358
chr5	25782627	25785627	PE_001885	25784127	3000	25783770;25784484;715
chr5	25799961	25802961	PE_001886	25801461	3000	25801226;25801696;471
chr5	25821815	25824815	PE_001887	25823315	3000	25823163;25823466;304
chr5	25870620	25873620	PE_001888	25872120	3000	25872021;25872218;198
chr5	25911514	25914514	PE_001889	25913014	3000	25912901;25913126;226
chr5	25938940	25941940	PE_001890	25940440	3000	25940121;25940758;638
chr5	25961789	25964789	PE_001891	25963289	3000	25963153;25963424;272
chr5	25967595	25970595	PE_001892	25969095	3000	25968895;25969295;401
chr5	25971309	25974309	PE_001893	25972809	3000	25972286;25973331;1046
chr5	25995019	25998019	PE_001894	25996519	3000	25996277;25996760;484
chr5	26013431	26016431	PE_001895	26014931	3000	26014587;26015275;689
chr5	26110668	26113668	PE_001896	26112168	3000	26111954;26112382;429
chr5	26240696	26243696	PE_001897	26242196	3000	26242110;26242281;172
chr5	26386023	26389023	PE_001898	26387523	3000	26387342;26387703;362
chr5	26389737	26392737	PE_001899	26391237	3000	26391050;26391423;374
chr5	26390721	26393721	PE_001900	26392221	3000	26392119;26392323;205
chr5	26460940	26463940	PE_001901	26462440	3000	26462277;26462603;327
chr5	26468982	26471982	PE_001902	26470482	3000	26470471;26470493;23
chr5	26484166	26487166	PE_001903	26485666	3000	26485388;26485943;556
chr5	26537172	26540172	PE_001904	26538672	3000	26538070;26539274;1205
chr5	26538101	26541101	PE_001905	26539601	3000	26539585;26539617;33
chr5	26539875	26542875	PE_001906	26541375	3000	26541052;26541698;647
chr5	26586919	26589919	PE_001907	26588419	3000	26588071;26588766;696
chr5	26587421	26590421	PE_001908	26588921	3000	26588840;26589002;163
chr5	26591081	26594081	PE_001909	26592581	3000	26592408;26592754;347
chr5	26634995	26637995	PE_001910	26636495	3000	26636331;26636658;328
chr5	26656404	26659404	PE_001911	26657904	3000	26657675;26658132;458
chr5	26674660	26677660	PE_001912	26676160	3000	26676080;26676239;160
chr5	26675074	26678074	PE_001913	26676574	3000	26676310;26676838;529
chr5	26694385	26697385	PE_001914	26695885	3000	26695798;26695972;175
chr5	26721061	26724061	PE_001915	26722561	3000	26722125;26722996;872
chr5	26721683	26724683	PE_001916	26723183	3000	26723019;26723347;329
chr5	26942721	26945721	PE_001917	26944221	3000	26944192;26944249;58
chr5	26947750	26950750	PE_001918	26949250	3000	26949185;26949315;131
chr5	26959513	26962513	PE_001919	26961013	3000	26960847;26961179;333

## Sheet: Table S2
Supplementary Table 2. Summary of RNA-seq data
Four data series of paired-end RNA-seq were generated in the study (two types of libraries for mutants and two types for corresponding control) and each of the dataset contains three biological replicates (a total of 12 datasets). The Tuxedo protocol was used to map and align the RNA-seq reads in each dataset and assemble the transcriptome. RNA-seq reads of each biological replicate were mapped i…
	Poly(A)+ dataseries						Ribo-minus dataseries
	RRP41			rrp41-i			RRP41			rrp41-i
	replica 1	replica 2	replica 3	replica 1	replica 2	replica 3	replica 1	replica 2	replica 3	replica 1	replica 2	replica 3
I. Individual reads in paired-end RNA-seq
a. Left read (R1)
Total number of reads	17341895	23953696	15557160	12138628	30285525	25490607	13422359	5471354	7024097	7120268	51822013	30890074
Total number of aligned reads	15367123	21056787	13621093	10685239	26608001	22233248	12821812	4791073	6127960	6205978	44623436	26933647
Percentage of reads aligned (%)	88.6	87.9	87.6	88	87.9	87.2	95.5	87.6	87.2	87.2	86.1	87.2
b. Right read (R2)
Total number of reads	17341895	23953696	15557160	12138628	30285525	25490607	13422359	5471354	7024097	7120268	51822013	30890074
Total number of aligned reads	16522233	22615164	14661184	11500994	28562249	23901974	12821812	5149388	6583742	6666399	47995593	28976682
Percentage of reads aligned (%)	95.3	94.4	94.2	94.7	94.3	93.8	95.5	94.1	93.7	93.6	92.6	93.8
The number for normalization (Total number of aligned read: R1+R2)	31889356	43671951	28282277	22186233	55170250	46135222	25643624	9940461	12711702	12872377	92619029	55910329
II. Informaiton on each read-pairs (R1+R2)
Percentage of overall read alignment (%)	91.9	91.2	90.9	91.4	91.1	90.5	95.5	90.8	90.5	90.4	89.4	90.5
Aligned read pairs	15216692	20840532	13489241	10583117	26302240	22000761	12821812	4744531	6064366	6141122	44151922	26644887
Number of read pairs have multiple alignment	1599066	1912469	998782	1286888	3432074	2744947	1021542	272191	308446	301502	2401685	2336824
Percentage of read pairs have multiple alignment (%)	10.5	9.2	7.4	12.2	13	12.5	8	5.7	5.1	4.9	5.4	808
Number of read pairs are discordant alignments	74669	100460	67931	74393	176275	149693	12820895	20529	25173	29819	218747	192313
Percentage of read pairs are discordant alignments (%)	0.5	0.5	0.5	0.7	0.7	0.7	100	0.4	0.4	0.5	0.5	0.7
Percentage of concordant pair alignment (%)	87.3	86.6	86.3	86.6	86.3	85.7	0	86.3	86	85.8	84.8	85.6

## Sheet: Table S3
Supplementary Table 3. The list of PEs regions affected by the exosome RRP41 depletion (n=207)
The genomic coordinates of PE regions affected by the exosome RRP41 depletion are listed (for supplementary Fig. 1).
Chromsome	Start	Stop	PE IDs	Position of PE midpoint	Length (nt)	Group assignment
Chr1	143978	146978	PE_000005	145478	3000	Group 3
Chr1	144357	147357	PE_000006	145857	3000	Group 3
Chr1	632019	635019	PE_000019	633519	3000	Group 2
Chr1	859100	862100	PE_000021	860600	3000	Group 4
Chr1	871456	874456	PE_000022	872956	3000	Group 2
Chr1	965396	968396	PE_000026	966896	3000	Group 2
Chr1	1022967	1025967	PE_000029	1024467	3000	Group 1
Chr1	1353622	1356622	PE_000043	1355122	3000	Group 2
Chr1	2616778	2619778	PE_000078	2618278	3000	Group 2
Chr1	2942009	2945009	PE_000088	2943509	3000	Group 1
Chr1	3047431	3050431	PE_000092	3048931	3000	Group 4
Chr1	3629053	3632053	PE_000107	3630553	3000	Group 1
Chr1	3721219	3724219	PE_000110	3722719	3000	Group 4
Chr1	3842595	3845595	PE_000113	3844095	3000	Group 4
Chr1	4871271	4874271	PE_000129	4872771	3000	Group 4
Chr1	5425052	5428052	PE_000145	5426552	3000	Group 3
Chr1	5595776	5598776	PE_000153	5597276	3000	Group 4
Chr1	7871285	7874285	PE_000190	7872785	3000	Group 1
Chr1	8521640	8524640	PE_000198	8523140	3000	Group 1
Chr1	11376363	11379363	PE_000241	11377863	3000	Group 2
Chr1	11425522	11428522	PE_000242	11427022	3000	Group 1
Chr1	11426019	11429019	PE_000243	11427519	3000	Group 1
Chr1	16620463	16623463	PE_000262	16621963	3000	Group 1
Chr1	18216662	18219662	PE_000275	18218162	3000	Group 3
Chr1	18217269	18220269	PE_000276	18218769	3000	Group 3
Chr1	18458565	18461565	PE_000281	18460065	3000	Group 2
Chr1	21252230	21255230	PE_000336	21253730	3000	Group 1
Chr1	22279088	22282088	PE_000346	22280588	3000	Group 4
Chr1	22335597	22338597	PE_000349	22337097	3000	Group 3
Chr1	22656341	22659341	PE_000359	22657841	3000	Group 1
Chr1	22671573	22674573	PE_000362	22673073	3000	Group 3
Chr1	24587793	24590793	PE_000396	24589293	3000	Group 3
Chr1	25078919	25081919	PE_000401	25080419	3000	Group 3
Chr1	25377631	25380631	PE_000409	25379131	3000	Group 2
Chr1	25827492	25830492	PE_000417	25828992	3000	Group 3
Chr1	25828081	25831081	PE_000418	25829581	3000	Group 3
Chr1	25890342	25893342	PE_000422	25891842	3000	Group 1
Chr1	25924737	25927737	PE_000423	25926237	3000	Group 2
Chr1	26898201	26901201	PE_000445	26899701	3000	Group 3
Chr1	26941545	26944545	PE_000448	26943045	3000	Group 3
Chr1	27130350	27133350	PE_000453	27131850	3000	Group 4
Chr1	27528523	27531523	PE_000459	27530023	3000	Group 2
Chr1	27672192	27675192	PE_000462	27673692	3000	Group 1
Chr1	27686701	27689701	PE_000463	27688201	3000	Group 3
Chr1	28413141	28416141	PE_000475	28414641	3000	Group 1
Chr1	29603785	29606785	PE_000491	29605285	3000	Group 1
Chr1	29802831	29805831	PE_000493	29804331	3000	Group 3
Chr1	29817352	29820352	PE_000494	29818852	3000	Group 1
Chr1	29817713	29820713	PE_000495	29819213	3000	Group 1
Chr2	779093	782093	PE_000525	780593	3000	Group 2
Chr2	850814	853814	PE_000527	852314	3000	Group 1
Chr2	1918808	1921808	PE_000533	1920308	3000	Group 3
Chr2	2978517	2981517	PE_000539	2980017	3000	Group 4
Chr2	7180811	7183811	PE_000551	7182311	3000	Group 1
Chr2	7601888	7604888	PE_000558	7603388	3000	Group 1
Chr2	7964088	7967088	PE_000568	7965588	3000	Group 4
Chr2	8838048	8841048	PE_000583	8839548	3000	Group 2
Chr2	9552393	9555393	PE_000594	9553893	3000	Group 1
Chr2	10028966	10031966	PE_000602	10030466	3000	Group 2
Chr2	10272325	10275325	PE_000603	10273825	3000	Group 1
Chr2	10503515	10506515	PE_000608	10505015	3000	Group 4
Chr2	10627534	10630534	PE_000610	10629034	3000	Group 1
Chr2	10841375	10844375	PE_000613	10842875	3000	Group 3
Chr2	11023633	11026633	PE_000618	11025133	3000	Group 3
Chr2	11070961	11073961	PE_000619	11072461	3000	Group 1
Chr2	11141896	11144896	PE_000620	11143396	3000	Group 2
Chr2	12041795	12044795	PE_000640	12043295	3000	Group 3
Chr2	12298512	12301512	PE_000645	12300012	3000	Group 2
Chr2	13854814	13857814	PE_000665	13856314	3000	Group 1
Chr2	14930163	14933163	PE_000695	14931663	3000	Group 1
Chr2	15313226	15316226	PE_000701	15314726	3000	Group 2
Chr2	15547980	15550980	PE_000705	15549480	3000	Group 3
Chr2	15574512	15577512	PE_000706	15576012	3000	Group 1
Chr2	15576733	15579733	PE_000707	15578233	3000	Group 1
Chr2	15858920	15861920	PE_000712	15860420	3000	Group 1
Chr2	15984716	15987716	PE_000714	15986216	3000	Group 4
Chr2	16199443	16202443	PE_000721	16200943	3000	Group 4
Chr2	16201346	16204346	PE_000722	16202846	3000	Group 3
Chr2	16386726	16389726	PE_000724	16388226	3000	Group 4
Chr2	16515739	16518739	PE_000726	16517239	3000	Group 1
Chr2	17609066	17612066	PE_000735	17610566	3000	Group 1
Chr2	18113750	18116750	PE_000746	18115250	3000	Group 2
Chr3	291732	294732	PE_000784	293232	3000	Group 1
Chr3	331767	334767	PE_000790	333267	3000	Group 4
Chr3	343071	346071	PE_000791	344571	3000	Group 1
Chr3	966013	969013	PE_000813	967513	3000	Group 1
Chr3	1066540	1069540	PE_000818	1068040	3000	Group 1
Chr3	1307434	1310434	PE_000826	1308934	3000	Group 3
Chr3	1655718	1658718	PE_000837	1657218	3000	Group 2
Chr3	1718603	1721603	PE_000839	1720103	3000	Group 3
Chr3	1816668	1819668	PE_000844	1818168	3000	Group 2
Chr3	1817332	1820332	PE_000845	1818832	3000	Group 2
Chr3	2468496	2471496	PE_000859	2469996	3000	Group 2
Chr3	2967360	2970360	PE_000864	2968860	3000	Group 1
Chr3	2967643	2970643	PE_000865	2969143	3000	Group 3
Chr3	3858595	3861595	PE_000882	3860095	3000	Group 4
Chr3	3879281	3882281	PE_000883	3880781	3000	Group 4
Chr3	4037959	4040959	PE_000887	4039459	3000	Group 2
Chr3	4560114	4563114	PE_000910	4561614	3000	Group 1
Chr3	4598342	4601342	PE_000915	4599842	3000	Group 1
Chr3	4608332	4611332	PE_000916	4609832	3000	Group 3
Chr3	4847858	4850858	PE_000923	4849358	3000	Group 2
Chr3	5828014	5831014	PE_000946	5829514	3000	Group 1
Chr3	5835914	5838914	PE_000947	5837414	3000	Group 2
Chr3	5837588	5840588	PE_000948	5839088	3000	Group 2
Chr3	6540929	6543929	PE_000959	6542429	3000	Group 4
Chr3	6880759	6883759	PE_000972	6882259	3000	Group 4
Chr3	6996536	6999536	PE_000974	6998036	3000	Group 3
Chr3	7057492	7060492	PE_000979	7058992	3000	Group 2
Chr3	7064759	7067759	PE_000982	7066259	3000	Group 4
Chr3	7155049	7158049	PE_000983	7156549	3000	Group 2
Chr3	7566031	7569031	PE_000991	7567531	3000	Group 1
Chr3	8676718	8679718	PE_001001	8678218	3000	Group 4
Chr3	9107632	9110632	PE_001009	9109132	3000	Group 1
Chr3	9111868	9114868	PE_001010	9113368	3000	Group 1
Chr3	9118235	9121235	PE_001011	9119735	3000	Group 1
Chr3	9242774	9245774	PE_001013	9244274	3000	Group 2
Chr3	10499647	10502647	PE_001029	10501147	3000	Group 1
Chr3	15516143	15519143	PE_001051	15517643	3000	Group 2
Chr3	16658142	16661142	PE_001058	16659642	3000	Group 1
Chr3	16658784	16661784	PE_001059	16660284	3000	Group 1
Chr3	18289253	18292253	PE_001084	18290753	3000	Group 3
Chr3	18873601	18876601	PE_001093	18875101	3000	Group 3
Chr3	19039743	19042743	PE_001097	19041243	3000	Group 4
Chr3	19051840	19054840	PE_001098	19053340	3000	Group 4
Chr3	19161354	19164354	PE_001105	19162854	3000	Group 1
Chr3	19348053	19351053	PE_001108	19349553	3000	Group 1
Chr3	20194646	20197646	PE_001128	20196146	3000	Group 3
Chr3	21002932	21005932	PE_001140	21004432	3000	Group 2
Chr3	21003182	21006182	PE_001141	21004682	3000	Group 2
Chr3	21230364	21233364	PE_001144	21231864	3000	Group 1
Chr3	21396212	21399212	PE_001147	21397712	3000	Group 1
Chr3	21518432	21521432	PE_001151	21519932	3000	Group 4
Chr3	21646889	21649889	PE_001152	21648389	3000	Group 4
Chr3	22100795	22103795	PE_001164	22102295	3000	Group 3
Chr3	22137397	22140397	PE_001167	22138897	3000	Group 4
Chr4	333080	336080	PE_001197	334580	3000	Group 3
Chr4	1069784	1072784	PE_001210	1071284	3000	Group 1
Chr4	1108344	1111344	PE_001211	1109844	3000	Group 2
Chr4	1375008	1378008	PE_001215	1376508	3000	Group 4
Chr4	1464756	1467756	PE_001217	1466256	3000	Group 1
Chr4	2523969	2526969	PE_001225	2525469	3000	Group 4
Chr4	7430577	7433577	PE_001249	7432077	3000	Group 4
Chr4	7963176	7966176	PE_001257	7964676	3000	Group 4
Chr4	8685647	8688647	PE_001269	8687147	3000	Group 4
Chr4	8686399	8689399	PE_001270	8687899	3000	Group 4
Chr4	9497730	9500730	PE_001290	9499230	3000	Group 1
Chr4	10010772	10013772	PE_001300	10012272	3000	Group 1
Chr4	10011309	10014309	PE_001301	10012809	3000	Group 1
Chr4	10068200	10071200	PE_001302	10069700	3000	Group 1
Chr4	10978190	10981190	PE_001312	10979690	3000	Group 4
Chr4	10986479	10989479	PE_001314	10987979	3000	Group 1
Chr4	11204334	11207334	PE_001317	11205834	3000	Group 3
Chr4	11204790	11207790	PE_001318	11206290	3000	Group 3
Chr4	12146706	12149706	PE_001337	12148206	3000	Group 1
Chr4	14257266	14260266	PE_001389	14258766	3000	Group 4
Chr4	15885744	15888744	PE_001424	15887244	3000	Group 3
Chr4	17432387	17435387	PE_001454	17433887	3000	Group 1
Chr4	17801290	17804290	PE_001458	17802790	3000	Group 1
Chr4	18369422	18372422	PE_001471	18370922	3000	Group 1
Chr4	18370591	18373591	PE_001472	18372091	3000	Group 1
Chr4	18370751	18373751	PE_001473	18372251	3000	Group 1
Chr4	18551772	18554772	PE_001477	18553272	3000	Group 3
Chr5	410456	413456	PE_001482	411956	3000	Group 4
Chr5	411267	414267	PE_001483	412767	3000	Group 4
Chr5	411888	414888	PE_001484	413388	3000	Group 4
Chr5	528948	531948	PE_001485	530448	3000	Group 3
Chr5	1016785	1019785	PE_001497	1018285	3000	Group 2
Chr5	1316438	1319438	PE_001500	1317938	3000	Group 3
Chr5	1600541	1603541	PE_001511	1602041	3000	Group 1
Chr5	1613913	1616913	PE_001512	1615413	3000	Group 1
Chr5	1701027	1704027	PE_001514	1702527	3000	Group 2
Chr5	3060550	3063550	PE_001555	3062050	3000	Group 2
Chr5	3233732	3236732	PE_001558	3235232	3000	Group 3
Chr5	3466708	3469708	PE_001562	3468208	3000	Group 3
Chr5	4160093	4163093	PE_001591	4161593	3000	Group 4
Chr5	4160572	4163572	PE_001592	4162072	3000	Group 4
Chr5	4178435	4181435	PE_001593	4179935	3000	Group 1
Chr5	4215659	4218659	PE_001594	4217159	3000	Group 1
Chr5	4563306	4566306	PE_001607	4564806	3000	Group 4
Chr5	4591834	4594834	PE_001608	4593334	3000	Group 3
Chr5	4956811	4959811	PE_001612	4958311	3000	Group 1
Chr5	5757033	5760033	PE_001622	5758533	3000	Group 2
Chr5	5757692	5760692	PE_001623	5759192	3000	Group 2
Chr5	6989982	6992982	PE_001640	6991482	3000	Group 1
Chr5	7473253	7476253	PE_001646	7474753	3000	Group 4
Chr5	8066645	8069645	PE_001656	8068145	3000	Group 4
Chr5	8866261	8869261	PE_001664	8867761	3000	Group 4
Chr5	16080376	16083376	PE_001701	16081876	3000	Group 4
Chr5	16721138	16724138	PE_001712	16722638	3000	Group 1
Chr5	17120525	17123525	PE_001720	17122025	3000	Group 4
Chr5	17838992	17841992	PE_001731	17840492	3000	Group 1
Chr5	18729929	18732929	PE_001745	18731429	3000	Group 1
Chr5	19482459	19485459	PE_001757	19483959	3000	Group 4
Chr5	19707731	19710731	PE_001765	19709231	3000	Group 4
Chr5	20757322	20760322	PE_001779	20758822	3000	Group 2
Chr5	21556715	21559715	PE_001794	21558215	3000	Group 1
Chr5	21859542	21862542	PE_001797	21861042	3000	Group 1
Chr5	21867320	21870320	PE_001798	21868820	3000	Group 3
Chr5	22592418	22595418	PE_001814	22593918	3000	Group 3
Chr5	23375677	23378677	PE_001829	23377177	3000	Group 3
Chr5	23850365	23853365	PE_001840	23851865	3000	Group 2
Chr5	25382253	25385253	PE_001874	25383753	3000	Group 1
Chr5	25535410	25538410	PE_001880	25536910	3000	Group 3
Chr5	25995019	25998019	PE_001894	25996519	3000	Group 3
Chr5	26013431	26016431	PE_001895	26014931	3000	Group 4
Chr5	26959513	26962513	PE_001919	26961013	3000	Group 3

## Sheet: Table S4
Supplementary Table 4. Summary of TFs with binding peaks in PE regions
The summary of TFs with binding peaks in PE regions based on DAP-seq data (for Fig. 2. e-g), and binding peaks are ranked from high to low of total TF binding at PE regions. The TF names as described in DAP-seq experiment, number of binding sites, TF family information, AGI ID, and common TF names are shown from left to right. There are two separate panels: (i) The list of TFs with binding peaks …
(i) The list of TFs with binding peaks located at midpoint-proximal regions of PEs							(ii) The list of TFs with binding peaks located within the entire 3-kb PE regions
Rank	TF names in DAP-seq	Number of TF binding sites at midpoint-proximal regions	TF family	AGI_ID	TF names		Rank	TF names in DAP-seq	Number of TF binding sites at entire 3-kb PE regions	TF family	AGI_ID	TF names
1	C2C2dof_tnt-AT5G02460_col_a	5564	C2C2-DOF	AT5G02460	AT5G02460		1	G2like_tnt-At3g24120_col_a	14500	G2-like	AT3G24120	At3g24120
2	ARF_ecoli-MP_col	5344	ARF	AT1G19850	MP		2	ARF_ecoli-MP_col	12840	ARF	AT1G19850	MP
3	C2C2dof_tnt-At5g62940_col_a	5325	C2C2-DOF	AT5G62940	At5g62940		3	HSF_tnt-HSFA6B_col	12812	HSF	AT3G22830	HSFA6B
4	MYB_tnt-MYB77_col_a	4829	MYB	AT3G50060	MYB77		4	MYB_tnt-MYB77_col_a	12096	MYB	AT3G50060	MYB77
5	G2like_tnt-At3g24120_col_a	4767	G2-like	AT3G24120	At3g24120		5	C2C2dof_tnt-AT5G02460_col_a	11810	C2C2-DOF	AT5G02460	AT5G02460
6	WRKY_tnt-WRKY22_col	4618	WRKY	AT4G01250	WRKY22		6	C2C2dof_tnt-At5g62940_col_a	11151	C2C2-DOF	AT5G62940	At5g62940
7	WRKY_tnt-WRKY15_col_b	4575	WRKY	AT2G23320	WRKY15		7	C2H2_tnt-STZ_col	10609	C2H2	AT1G27730	STZ
8	C2C2dof_tnt-dof45_col_a	4562	C2C2-DOF	AT4G21080	DOF4-5		8	WRKY_tnt-WRKY15_col_b	10538	WRKY	AT2G23320	WRKY15
9	C2C2dof_tnt-AT2G28810_col_a	4471	C2C2-DOF	AT2G28810	AT2G28810		9	WRKY_tnt-WRKY22_col	10439	WRKY	AT4G01250	WRKY22
10	WRKY_tnt-WRKY8_col	4346	WRKY	AT5G46350	WRKY8		10	MYBrelated_tnt-EPR1_col	10177	MYB-related	AT1G18330	EPR1
11	C2C2dof_tnt-AT5G66940_col_a	4240	C2C2-DOF	AT5G66940	AT5G66940		11	MYB_tnt-ATY13_col_a	10125	MYB	AT1G74650	ATY13
12	C2C2dof_tnt-OBP1_col_a	4238	C2C2-DOF	AT3G50410	OBP1		12	MYB_tnt-MYB33_col_a	9925	MYB	AT5G06100	MYB33
13	HSF_tnt-HSFA6B_col	4217	HSF	AT3G22830	HSFA6B		13	C2C2dof_tnt-OBP1_col_a	9883	C2C2-DOF	AT3G50410	OBP1
14	WRKY_tnt-WRKY75_col_a	4141	WRKY	AT5G13080	WRKY75		14	C2C2dof_tnt-dof45_col_a	9821	C2C2-DOF	AT4G21080	DOF4-5
15	MYB_tnt-MYB33_col_a	4138	MYB	AT5G06100	MYB33		15	MYB_tnt-MYB67_col_a	9648	MYB	AT3G12720	MYB67
16	MYBrelated_tnt-EPR1_col	3880	MYB-related	AT1G18330	EPR1		16	WRKY_tnt-WRKY8_col	9644	WRKY	AT5G46350	WRKY8
17	NAC_tnt-SND3_col_b	3775	NAC	AT1G28470	SND3		17	NAC_tnt-SND3_col_b	9626	NAC	AT1G28470	SND3
18	HB_tnt-ATHB40_col_a	3741	HB	AT4G36740	ATHB40		18	C2C2dof_tnt-AT2G28810_col_a	9491	C2C2-DOF	AT2G28810	AT2G28810
19	C2C2dof_tnt-dof24_col_a	3671	C2C2-DOF	AT2G37590	DOF2-4		19	WRKY_tnt-WRKY75_col_a	9292	WRKY	AT5G13080	WRKY75
20	MYBrelated_tnt-AT3G10113_col_a	3557	MYB-related	AT3G10113	AT3G10113		20	SBP_tnt-SPL9_col_a	9155	SBP	AT2G42200	SPL9
21	ZFHD_tnt-ATHB23_col_b	3556	ZF-HD	AT5G39760	ATHB23		21	MYBrelated_tnt-AT3G10113_col_a	9151	MYB-related	AT3G10113	AT3G10113
22	C2H2_tnt-STZ_col	3512	C2H2	AT1G27730	STZ		22	C2C2dof_tnt-AT5G66940_col_a	9003	C2C2-DOF	AT5G66940	AT5G66940
23	WRKY_tnt-WRKY18_col_a	3412	WRKY	AT4G31800	WRKY18		23	HB_tnt-ATHB40_col_a	8880	HB	AT4G36740	ATHB40
24	MYBrelated_tnt-RVE1_col_a	3351	MYB-related	AT5G17300	RVE1		24	WRKY_tnt-WRKY18_col_a	8875	WRKY	AT4G31800	WRKY18
25	MYB_tnt-MYB67_col_a	3335	MYB	AT3G12720	MYB67		25	MYBrelated_tnt-RVE1_col_a	8739	MYB-related	AT5G17300	RVE1
26	MYB_tnt-ATY13_col_a	3307	MYB	AT1G74650	ATY13		26	ZFHD_tnt-ATHB23_col_b	7991	ZF-HD	AT5G39760	ATHB23
27	ZFHD_tnt-ATHB25_col_a	3214	ZF-HD	AT5G65410	ATHB25		27	HB_tnt-ATHB5_col_a	7836	HB	AT5G65310	ATHB5
28	HB_tnt-ATHB5_col_a	3213	HB	AT5G65310	ATHB5		28	MYBrelated_tnt-At1g49010_col_a	7730	MYB-related	AT1G49010	At1g49010
29	Homeobox_tnt-ATHB13_col_a	3076	Homeobox	AT1G69780	ATHB13		29	C2C2dof_tnt-dof24_col_a	7644	C2C2-DOF	AT2G37590	DOF2-4
30	WRKY_tnt-WRKY50_col_a	3053	WRKY	AT5G26170	WRKY50		30	AP2EREBP_tnt-CEJ1_col_a	7410	AP2-EREBP	AT3G50260	CEJ1
31	WRKY_tnt-WRKY28_col_a	3046	WRKY	AT4G18170	WRKY28		31	ZFHD_tnt-ATHB25_col_a	7280	ZF-HD	AT5G65410	ATHB25
32	Orphan_tnt-BBX31_col_a	3006	Orphan	AT3G21890	BBX31		32	Homeobox_tnt-ATHB13_col_a	7271	Homeobox	AT1G69780	ATHB13
33	SBP_tnt-SPL9_col_a	2992	SBP	AT2G42200	SPL9		33	NAC_tnt-SMB_col_a	7149	NAC	AT1G79580	SMB
34	C2C2dof_tnt-At3g45610_col_a	2976	C2C2-DOF	AT3G45610	At3g45610		34	MYB_tnt-MYB44_col	7111	MYB	AT5G67300	MYB44
35	ABI3VP1_tnt-AT5G60130_col_a	2975	ABI3-VP1	AT5G60130	AT5G60130		35	G2like_tnt-AT5G45580_col_a	7056	G2-like	AT5G45580	AT5G45580
36	AP2EREBP_tnt-CEJ1_col_a	2970	AP2-EREBP	AT3G50260	CEJ1		36	NAC_tnt-ANAC016_col_a	6956	NAC	AT1G34180	ANAC016
37	C2C2dof_tnt-OBP3_col_a	2918	C2C2-DOF	AT3G55370	OBP3		37	G2like_tnt-At3g04030_col_a	6939	G2-like	AT3G04030	At3g04030
38	MYB_tnt-MYB44_col	2885	MYB	AT5G67300	MYB44		38	C2C2dof_tnt-At3g45610_col_a	6886	C2C2-DOF	AT3G45610	At3g45610
39	NAC_tnt-ANAC071_col_a	2872	NAC	AT4G17980	ANAC071		39	NAC_tnt-ANAC071_col_a	6830	NAC	AT4G17980	ANAC071
40	ZFHD_tnt-ATHB33_col_a	2844	ZF-HD	AT1G75240	ATHB33		40	ABI3VP1_tnt-AT5G60130_col_a	6694	ABI3-VP1	AT5G60130	AT5G60130
41	NAC_tnt-SMB_col_a	2840	NAC	AT1G79580	SMB		41	WRKY_tnt-WRKY50_col_a	6447	WRKY	AT5G26170	WRKY50
42	REM_tnt-REM19_col_a	2788	REM	AT1G49480	REM19		42	ZFHD_tnt-ATHB33_col_a	6409	ZF-HD	AT1G75240	ATHB33
43	HB_tnt-LMI1_col_a	2724	HB	AT5G03790	LMI1		43	Orphan_tnt-BBX31_col_a	6368	Orphan	AT3G21890	BBX31
44	C2H2_tnt-IDD4_col_a	2673	C2H2	AT2G02080	IDD4		44	bHLH_tnt-BIM2_col_v3b	6280	bHLH	AT1G69010	BIM2
45	ZFHD_tnt-AtHB32_col200_a	2639	ZF-HD	AT1G14687	AtHB32		45	HB_tnt-LMI1_col_a	6251	HB	AT5G03790	LMI1
46	C2C2dof_tnt-DAG2_col_a	2636	C2C2-DOF	AT2G46590	DAG2		46	LOBAS2_tnt-LBD2_col_a	6190	LOBAS2	AT1G06280	LBD2
47	G2like_tnt-At3g04030_col_a	2572	G2-like	AT3G04030	At3g04030		47	C2C2dof_tnt-DAG2_col_a	6186	C2C2-DOF	AT2G46590	DAG2
48	NAC_tnt-ANAC016_col_a	2526	NAC	AT1G34180	ANAC016		48	WRKY_tnt-WRKY28_col_a	6154	WRKY	AT4G18170	WRKY28
49	MYBrelated_tnt-At1g49010_col_a	2512	MYB-related	AT1G49010	At1g49010		49	MADS_tnt-AGL63_col_a	6144	MADS	AT1G31140	AGL63
50	bHLH_tnt-BIM2_col_v3b	2506	bHLH	AT1G69010	BIM2		50	bZIP_tnt-TGA6_col_a	6129	bZIP	AT3G12250	TGA6
51	NAC_tnt-ANAC058_col_a	2490	NAC	AT3G18400	ANAC058		51	C2C2dof_tnt-OBP3_col_a	6123	C2C2-DOF	AT3G55370	OBP3
52	C3H_tnt-AT5G63260_col_a	2433	C3H	AT5G63260	AT5G63260		52	ZFHD_tnt-AtHB32_col200_a	6016	ZF-HD	AT1G14687	AtHB32
53	WRKY_tnt-WRKY45_col_a	2414	WRKY	AT3G01970	WRKY45		53	MYBrelated_tnt-LHY1_col_a	6002	MYB-related	AT1G01060	LHY1
54	LOBAS2_tnt-LBD2_col_a	2414	LOBAS2	AT1G06280	LBD2		54	C3H_tnt-AT5G63260_col_a	5967	C3H	AT5G63260	AT5G63260
55	G2like_tnt-AT5G45580_col_a	2407	G2-like	AT5G45580	AT5G45580		55	G2like_tnt-AT4G37180_col_a	5952	G2-like	AT4G37180	AT4G37180
56	MADS_tnt-AGL63_col_a	2406	MADS	AT1G31140	AGL63		56	NAC_tnt-ANAC058_col_a	5929	NAC	AT3G18400	ANAC058
57	bZIP_tnt-TGA6_col_a	2379	bZIP	AT3G12250	TGA6		57	MYBrelated_tnt-At5g47390_col_b	5915	MYB-related	AT5G47390	At5g47390
58	MYBrelated_tnt-LHY1_col_a	2360	MYB-related	AT1G01060	LHY1		58	AP2EREBP_tnt-At4g16750_col_a	5776	AP2-EREBP	AT4G16750	At4g16750
59	C2C2dof_tnt-OBP4_col_a	2329	C2C2-DOF	AT5G60850	OBP4		59	C2C2dof_tnt-OBP4_col_a	5757	C2C2-DOF	AT5G60850	OBP4
60	AP2EREBP_tnt-At4g16750_col_a	2292	AP2-EREBP	AT4G16750	At4g16750		60	C2H2_tnt-IDD4_col_a	5740	C2H2	AT2G02080	IDD4
61	WRKY_tnt-WRKY71_col_a	2274	WRKY	AT1G29860	WRKY71		61	REM_tnt-REM19_col_a	5620	REM	AT1G49480	REM19
62	C2C2dof_tnt-At1g64620_100ng20cy_b	2230	C2C2-DOF	AT1G64620	At1g64620		62	RAV_tnt-RAV1_col	5415	RAV	AT1G13260	RAV1
63	MYB_tnt-MYB70_col_a	2222	MYB	AT2G23290	MYB70		63	NAC_tnt-ANAC045_col_a	5405	NAC	AT3G03200	ANAC045
64	MYBrelated_tnt-At5g47390_col_b	2211	MYB-related	AT5G47390	At5g47390		64	bHLH_tnt-bHLH122_col100_a	5396	bHLH	AT1G51140	bHLH122
65	NAC_tnt-ANAC083_col_v3a	2175	NAC	AT5G13180	ANAC083		65	NAC_tnt-VND6_col_v31	5324	NAC	AT5G62380	VND6
66	G2like_tnt-AT4G37180_col_a	2131	G2-like	AT4G37180	AT4G37180		66	G2like_tnt-At2g03500_col_a	5317	G2-like	AT2G03500	At2g03500
67	NAC_tnt-ANAC045_col_a	2109	NAC	AT3G03200	ANAC045		67	ARF_tnt-ARF2_col_v31	5291	ARF	AT5G62000	ARF2
68	NAC_tnt-VND6_col_v31	2077	NAC	AT5G62380	VND6		68	C2H2_tnt-AT4G26030_col_a	5269	C2H2	AT4G26030	AT4G26030
69	WRKY_tnt-WRKY65_col_a	2076	WRKY	AT1G29280	WRKY65		69	NAC_tnt-ANAC083_col_v3a	5247	NAC	AT5G13180	ANAC083
70	C2C2dof_tnt-Adof1_col_a	2075	C2C2-DOF	AT1G51700	ADOF1		70	AP2EREBP_tnt-ERF7_col_a	5204	AP2-EREBP	AT3G20310	ERF7
71	MYB_tnt-MYB3R1_col_a	2069	MYB	AT4G32730	MYB3R1		71	NAC_tnt-VND2_col_a	5146	NAC	AT4G36160	VND2
72	C2H2_tnt-AT4G26030_col_a	2052	C2H2	AT4G26030	AT4G26030		72	C2H2_tnt-At3g60580_col_a	5085	C2H2	AT3G60580	At3g60580
73	WRKY_tnt-WRKY55_col_a	2040	WRKY	AT2G40740	WRKY55		73	MYB_tnt-MYB70_col_a	5079	MYB	AT2G23290	MYB70
74	NAC_tnt-VND2_col_a	2021	NAC	AT4G36160	VND2		74	MYB_tnt-MYB57_col_a	5031	MYB	AT3G01530	MYB57
75	ARF_tnt-ARF2_col_v31	1970	ARF	AT5G62000	ARF2		75	G2like_tnt-At1g25550_col	5026	G2-like	AT1G25550	At1g25550
76	C2C2dof_tnt-COG1_col_a	1957	C2C2-DOF	AT1G29160	COG1		76	C2C2dof_tnt-At1g64620_100ng20cy_b	4951	C2C2-DOF	AT1G64620	At1g64620
77	NAC_tnt-ANAC096_col	1954	NAC	AT5G46590	ANAC096		77	AP2EREBP_tnt-AT1G71450_col_a	4869	AP2-EREBP	AT1G71450	AT1G71450
78	RAV_tnt-RAV1_col	1949	RAV	AT1G13260	RAV1		78	NAC_tnt-NST1_col_v31	4836	NAC	AT2G46770	NST1
79	NAC_tnt-NST1_col_v31	1923	NAC	AT2G46770	NST1		79	C2C2dof_tnt-Adof1_col_a	4834	C2C2-DOF	AT1G51700	ADOF1
80	MYB_tnt-MYB57_col_a	1896	MYB	AT3G01530	MYB57		80	NAC_tnt-ANAC096_col	4818	NAC	AT5G46590	ANAC096
81	G2like_tnt-At2g03500_col_a	1891	G2-like	AT2G03500	At2g03500		81	WRKY_tnt-WRKY45_col_a	4753	WRKY	AT3G01970	WRKY45
82	WRKY_tnt-WRKY70_col	1872	WRKY	AT3G56400	WRKY70		82	NAC_tnt-NTM1_col_a	4728	NAC	AT4G01540	NTM1
83	AP2EREBP_tnt-AT1G71450_col_a	1858	AP2-EREBP	AT1G71450	AT1G71450		83	G2like_tnt-At2g01060_col	4699	G2-like	AT2G01060	At2g01060
84	MADS_tnt-SVP_col_v3b	1851	MADS	AT2G22540	SVP		84	GeBP_tnt-AT4G00250_col_a	4668	GeBP	AT4G00250	AT4G00250
85	AP2EREBP_tnt-CBF4_col_a	1841	AP2-EREBP	AT5G51990	CBF4		85	Homeobox_tnt-ATHB7_col_a	4585	Homeobox	AT2G46680	ATHB7
86	NAC_tnt-VND4_col	1824	NAC	AT1G12260	VND4		86	AP2EREBP_tnt-CBF4_col_a	4568	AP2-EREBP	AT5G51990	CBF4
87	NAC_tnt-ANAC070_col	1821	NAC	AT4G10350	ANAC070		87	NAC_tnt-VND4_col	4562	NAC	AT1G12260	VND4
88	bHLH_tnt-bHLH122_col100_a	1809	bHLH	AT1G51140	bHLH122		88	MYBrelated_tnt-At1g19000_col_a	4542	MYB-related	AT1G19000	At1g19000
89	NAC_tnt-NAC2_col_v3a	1741	NAC	AT5G04410	NAC2		89	NAC_tnt-ANAC070_col	4540	NAC	AT4G10350	ANAC070
90	bZIP_tnt-GBF6_col	1729	bZIP	AT4G34590	GBF6		90	C2H2_tnt-At5g04390_col200_a	4443	C2H2	AT5G04390	At5g04390
91	NAC_tnt-NTM1_col_a	1724	NAC	AT4G01540	NTM1		91	NAC_tnt-ANAC050_col_v3a	4393	NAC	AT3G10480	ANAC050
92	AP2EREBP_tnt-ERF7_col_a	1722	AP2-EREBP	AT3G20310	ERF7		92	WRKY_tnt-WRKY65_col_a	4363	WRKY	AT1G29280	WRKY65
93	MYB_tnt-MYB73_col_a	1711	MYB	AT4G37260	MYB73		93	WRKY_tnt-WRKY71_col_a	4352	WRKY	AT1G29860	WRKY71
94	NAC_tnt-ANAC050_col_v3a	1702	NAC	AT3G10480	ANAC050		94	NAC_tnt-NAC2_col_v3a	4330	NAC	AT5G04410	NAC2
95	Trihelix_tnt-GTL1_col_a	1693	Trihelix	AT1G33240	GTL1		95	C2C2dof_tnt-COG1_col_a	4288	C2C2-DOF	AT1G29160	COG1
96	WRKY_tnt-WRKY40_col	1688	WRKY	AT1G80840	WRKY40		96	MYB_tnt-MYB88_col_a	4218	MYB	AT2G02820	MYB88
97	WRKY_tnt-WRKY24_col_a	1641	WRKY	AT5G41570	WRKY24		97	WRKY_tnt-WRKY55_col_a	4214	WRKY	AT2G40740	WRKY55
98	G2like_tnt-At1g25550_col	1636	G2-like	AT1G25550	At1g25550		98	MYB_tnt-MYB3R1_col_a	4205	MYB	AT4G32730	MYB3R1
99	Homeobox_tnt-ATHB7_col_a	1590	Homeobox	AT2G46680	ATHB7		99	MADS_tnt-SVP_col_v3b	4173	MADS	AT2G22540	SVP
100	NAC_tnt-ATAF1_col_a	1587	NAC	AT1G01720	ATAF1		100	G2like_tnt-AT1G49560_col_a	4141	G2-like	AT1G49560	AT1G49560
101	C2H2_tnt-At5g04390_col200_a	1575	C2H2	AT5G04390	At5g04390		101	HSF_tnt-HSF3_col_a	4093	HSF	AT5G16820	HSF3
102	HB_tnt-PHV_col_a	1568	HB	AT1G30490	PHV		102	G2like_tnt-At1g68670_col	4058	G2-like	AT1G68670	At1g68670
103	bZIP_tnt-bZIP68_col_a	1548	bZIP	AT1G32150	bZIP68		103	bZIP_tnt-GBF6_col	3998	bZIP	AT4G34590	GBF6
104	C2C2dof_tnt-AT1G69570_col_a	1539	C2C2-DOF	AT1G69570	AT1G69570		104	NAC_tnt-ATAF1_col_a	3971	NAC	AT1G01720	ATAF1
105	C2H2_tnt-At3g60580_col_a	1533	C2H2	AT3G60580	At3g60580		105	MYB_tnt-MYB73_col_a	3971	MYB	AT4G37260	MYB73
106	NAC_tnt-ANAC047_col	1532	NAC	AT3G04070	ANAC047		106	GRF_tnt-AtGRF6_col_a	3967	GRF	AT2G06200	AtGRF6
107	G2like_tnt-At2g01060_col	1519	G2-like	AT2G01060	At2g01060		107	Trihelix_tnt-GTL1_col_a	3881	Trihelix	AT1G33240	GTL1
108	MYB_tnt-MYB107_col_a	1500	MYB	AT3G02940	MYB107		108	MYB_tnt-MYB107_col_a	3856	MYB	AT3G02940	MYB107
109	Trihelix_tnt-AT5G05550_col_a	1494	Trihelix	AT5G05550	AT5G05550		109	WRKY_tnt-WRKY70_col	3836	WRKY	AT3G56400	WRKY70
110	MYBrelated_tnt-At3g09600_col_a	1487	MYB-related	AT3G09600	At3g09600		110	S1Falike_tnt-AT3G09735_col_a	3824	S1Fa-like	AT3G09735	AT3G09735
111	NAC_tnt-ANAC028_col_a	1478	NAC	AT1G65910	ANAC028		111	bHLH_tnt-bHLH28_col_a	3814	bHLH	AT5G46830	bHLH28
112	NAC_tnt-ANAC055_col	1473	NAC	AT3G15500	ANAC055		112	Homeobox_tnt-ATHB6_col_a	3775	Homeobox	AT2G22430	ATHB6
113	HB_tnt-ATHB53_col_a	1471	HB	AT5G66700	ATHB53		113	HB_tnt-PHV_col_a	3754	HB	AT1G30490	PHV
114	WRKY_tnt-WRKY33_col_a	1452	WRKY	AT2G38470	WRKY33		114	LOBAS2_tnt-LBD19_col_a	3623	LOBAS2	AT2G45410	LBD19
115	Trihelix_tnt-GT2_col_a	1450	Trihelix	AT1G76890	GT2		115	AP2EREBP_tnt-ERF15_col	3604	AP2-EREBP	AT2G31230	ERF15
116	WRKY_tnt-WRKY25_col_a	1449	WRKY	AT2G30250	WRKY25		116	WRKY_tnt-WRKY40_col	3522	WRKY	AT1G80840	WRKY40
117	MYBrelated_tnt-At1g19000_col_a	1441	MYB-related	AT1G19000	At1g19000		117	NAC_tnt-ANAC028_col_a	3497	NAC	AT1G65910	ANAC028
118	GeBP_tnt-AT4G00250_col_a	1411	GeBP	AT4G00250	AT4G00250		118	HB_tnt-ATHB53_col_a	3485	HB	AT5G66700	ATHB53
119	MYB_tnt-MYB88_col_a	1406	MYB	AT2G02820	MYB88		119	MYBrelated_tnt-At3g09600_col_a	3459	MYB-related	AT3G09600	At3g09600
120	bHLH_tnt-bHLH28_col_a	1393	bHLH	AT5G46830	bHLH28		120	bZIP_tnt-bZIP68_col_a	3453	bZIP	AT1G32150	bZIP68
121	HSF_tnt-HSF3_col_a	1392	HSF	AT5G16820	HSF3		121	C2C2YABBY_tnt-CRC_col_a	3440	C2C2-YABBY	AT1G69180	CRC
122	bZIP_tnt-bZIP3_col_a	1388	bZIP	AT5G15830	bZIP3		122	WRKY_tnt-WRKY24_col_a	3424	WRKY	AT5G41570	WRKY24
123	NAC_tnt-ANAC020_col_v31	1380	NAC	AT1G54330	ANAC020		123	MYB_tnt-MS188_col_a	3378	MYB	AT5G56110	MS188
124	Homeobox_tnt-HDG1_col100_a	1363	Homeobox	AT3G61150	HDG1		124	NAC_tnt-ANAC020_col_v31	3361	NAC	AT1G54330	ANAC020
125	G2like_tnt-At1g68670_col	1361	G2-like	AT1G68670	At1g68670		125	Homeobox_tnt-HDG1_col100_a	3288	Homeobox	AT3G61150	HDG1
126	bZIP_tnt-bZIP53_col	1358	bZIP	AT3G62420	bZIP53		126	NAC_tnt-ANAC047_col	3285	NAC	AT3G04070	ANAC047
127	MYB_tnt-MS188_col_a	1351	MYB	AT5G56110	MS188		127	NAC_tnt-VND1_col_a	3255	NAC	AT2G18060	VND1
128	Homeobox_ecoli-HAT2_col_v31	1350	Homeobox	AT5G47370	HAT2		128	MYBrelated_tnt-At1g74840_col100_a	3238	MYB-related	AT1G74840	At1g74840
129	C2C2dof_tnt-CDF3_col_a	1345	C2C2-DOF	AT3G47500	CDF3		129	Trihelix_tnt-AT5G05550_col_a	3225	Trihelix	AT5G05550	AT5G05550
130	S1Falike_tnt-AT3G09735_col_a	1342	S1Fa-like	AT3G09735	AT3G09735		130	Trihelix_tnt-GT2_col_a	3220	Trihelix	AT1G76890	GT2
131	NAC_tnt-VND1_col_a	1339	NAC	AT2G18060	VND1		131	NAC_tnt-ANAC055_col	3179	NAC	AT3G15500	ANAC055
132	G2like_tnt-AT1G49560_col_a	1326	G2-like	AT1G49560	AT1G49560		132	Homeobox_ecoli-HAT2_col_v31	3162	Homeobox	AT5G47370	HAT2
133	AP2EREBP_tnt-ERF15_col	1293	AP2-EREBP	AT2G31230	ERF15		133	bZIP_tnt-bZIP3_col_a	3151	bZIP	AT5G15830	bZIP3
134	MYBrelated_tnt-At4g01280_col_a	1290	MYB-related	AT4G01280	At4g01280		134	bHLH_tnt-bHLH80_col_a	3061	bHLH	AT1G35460	bHLH80
135	C2C2dof_tnt-At4g38000_col_a	1278	C2C2-DOF	AT4G38000	At4g38000		135	C2C2dof_tnt-AT1G69570_col_a	2999	C2C2-DOF	AT1G69570	AT1G69570
136	MYBrelated_tnt-TBP3_col_a	1236	MYB-related	AT5G67580	TBP3		136	MYBrelated_tnt-At4g01280_col_a	2985	MYB-related	AT4G01280	At4g01280
137	Homeobox_tnt-ATHB6_col_a	1234	Homeobox	AT2G22430	ATHB6		137	C2C2dof_tnt-CDF3_col_a	2977	C2C2-DOF	AT3G47500	CDF3
138	ARID_tnt-AT1G20910_col_a	1228	ARID	AT1G20910	AT1G20910		138	NAC_tnt-ANAC005_col_a	2866	NAC	AT1G02250	ANAC005
139	LOBAS2_tnt-LBD19_col_a	1226	LOBAS2	AT2G45410	LBD19		139	NAC_tnt-ANAC004_col_a	2842	NAC	AT1G02230	ANAC004
140	C2C2YABBY_tnt-CRC_col_a	1224	C2C2-YABBY	AT1G69180	CRC		140	bZIP_tnt-bZIP53_col	2837	bZIP	AT3G62420	bZIP53
141	NAC_tnt-CUC3_col_a	1191	NAC	AT1G76420	CUC3		141	MYB_tnt-MYB49_col_a	2833	MYB	AT5G54230	MYB49
142	ABI3VP1_tnt-VRN1_col_a	1166	ABI3-VP1	AT3G18990	VRN1		142	AP2EREBP_tnt-Rap210_col_a	2817	AP2-EREBP	AT5G52020	Rap2-10
143	AP2EREBP_tnt-AT1G12630_col_a	1144	AP2-EREBP	AT1G12630	AT1G12630		143	AP2EREBP_tnt-AT1G12630_col_a	2815	AP2-EREBP	AT1G12630	AT1G12630
144	bZIP_tnt-GBF3_col	1130	bZIP	AT2G46270	GBF3		144	NAC_tnt-ANAC038_col_a	2804	NAC	AT2G24430	ANAC038
145	MYB_tnt-MYB119_col_a	1124	MYB	AT5G58850	MYB119		145	AP2EREBP_tnt-At1g19210_col_a	2764	AP2-EREBP	AT1G19210	At1g19210
146	MYB_tnt-MYB49_col_a	1115	MYB	AT5G54230	MYB49		146	WRKY_tnt-WRKY25_col_a	2763	WRKY	AT2G30250	WRKY25
147	C2H2_tnt-IDD7_col_a	1104	C2H2	AT1G55110	IDD7		147	MYBrelated_tnt-AT5G56840_col_a	2760	MYB-related	AT5G56840	AT5G56840
148	bHLH_tnt-bHLH80_col_a	1097	bHLH	AT1G35460	bHLH80		148	ARID_tnt-AT1G20910_col_a	2758	ARID	AT1G20910	AT1G20910
149	GRF_tnt-AtGRF6_col_a	1095	GRF	AT2G06200	AtGRF6		149	bZIP_tnt-bZIP52_col_v31	2722	bZIP	AT1G06850	bZIP52
150	WRKY_tnt-WRKY14_col_a	1089	WRKY	AT1G30650	WRKY14		150	NAC_tnt-CUC3_col_a	2715	NAC	AT1G76420	CUC3
151	AP2EREBP_tnt-Rap210_col_a	1089	AP2-EREBP	AT5G52020	Rap2-10		151	AP2EREBP_tnt-CBF1_col_a	2696	AP2-EREBP	AT4G25490	CBF1
152	NAC_tnt-ANAC005_col_a	1074	NAC	AT1G02250	ANAC005		152	HB_tnt-ATHB21_col_a	2654	HB	AT2G18550	ATHB21
153	MYBrelated_tnt-At1g74840_col100_a	1054	MYB-related	AT1G74840	At1g74840		153	WRKY_tnt-WRKY33_col_a	2628	WRKY	AT2G38470	WRKY33
154	BZR_tnt-At4g36780_col_a	1054	BZR	AT4G36780	At4g36780		154	NAC_tnt-NTL8_col	2598	NAC	AT2G27300	NTL8
155	NAC_tnt-ANAC038_col_a	1037	NAC	AT2G24430	ANAC038		155	NAC_tnt-ANAC034_col	2594	NAC	AT2G02450	ANAC034
156	MYB_tnt-MYB58_col_a	1033	MYB	AT1G16490	MYB58		156	HB_tnt-ATHB15_col_a	2562	HB	AT1G52150	ATHB15
157	AP2EREBP_tnt-At1g19210_col_a	1031	AP2-EREBP	AT1G19210	At1g19210		157	C2C2dof_tnt-At4g38000_col_a	2504	C2C2-DOF	AT4G38000	At4g38000
158	HB_tnt-ATHB15_col_a	1026	HB	AT1G52150	ATHB15		158	NAC_tnt-ANAC013_col_a	2472	NAC	AT1G32870	ANAC013
159	AP2EREBP_tnt-CBF1_col_a	1020	AP2-EREBP	AT4G25490	CBF1		159	MYBrelated_tnt-TBP3_col_a	2453	MYB-related	AT5G67580	TBP3
160	HB_tnt-ANL2_col_a	1013	HB	AT4G00730	ANL2		160	C2H2_tnt-IDD7_col_a	2437	C2H2	AT1G55110	IDD7
161	HB_tnt-ATHB21_col_a	1008	HB	AT2G18550	ATHB21		161	MYB_tnt-MYB119_col_a	2421	MYB	AT5G58850	MYB119
162	MYBrelated_tnt-AT5G56840_col_a	1001	MYB-related	AT5G56840	AT5G56840		162	MYB_tnt-MYB58_col_a	2383	MYB	AT1G16490	MYB58
163	MYB_tnt-MYB98_col_a	996	MYB	AT4G18770	MYB98		163	HB_tnt-ANL2_col_a	2368	HB	AT4G00730	ANL2
164	NAC_tnt-NTL8_col	990	NAC	AT2G27300	NTL8		164	BZR_tnt-At4g36780_col_a	2356	BZR	AT4G36780	At4g36780
165	NAC_tnt-ANAC046_col	990	NAC	AT3G04060	ANAC046		165	SBP_tnt-SPL5_col_a	2318	SBP	AT3G15270	SPL5
166	NAC_tnt-ANAC053_col	981	NAC	AT3G10500	ANAC053		166	C2C2dof_tnt-AT3G52440_col_a	2318	C2C2-DOF	AT3G52440	AT3G52440
167	NAC_tnt-ANAC013_col_a	981	NAC	AT1G32870	ANAC013		167	AP2EREBP_tnt-AT1G77200_col_a	2316	AP2-EREBP	AT1G77200	AT1G77200
168	NAC_tnt-ANAC004_col_a	977	NAC	AT1G02230	ANAC004		168	MYB_tnt-MYB98_col_a	2301	MYB	AT4G18770	MYB98
169	NAC_tnt-ANAC034_col	974	NAC	AT2G02450	ANAC034		169	NAC_tnt-NTM2_col_b	2298	NAC	AT4G01550	NTM2
170	AP2EREBP_tnt-AT1G77200_col_a	960	AP2-EREBP	AT1G77200	AT1G77200		170	NAC_tnt-ANAC053_col	2296	NAC	AT3G10500	ANAC053
171	CPP_tnt-SOL1_col	953	CPP	AT3G22760	SOL1		171	NAC_tnt-ANAC103_col_a	2293	NAC	AT5G64060	ANAC103
172	ZFHD_tnt-ATHB34_col_a	946	ZF-HD	AT3G28920	ATHB34		172	NAC_tnt-ANAC075_col_a	2279	NAC	AT4G29230	ANAC075
173	NAC_tnt-NAM_col_v3a	943	NAC	AT1G52880	NAM		173	ABI3VP1_tnt-VRN1_col_a	2255	ABI3-VP1	AT3G18990	VRN1
174	MYBrelated_tnt-LCL1_col	934	MYB-related	AT5G02840	LCL1		174	MYBrelated_tnt-AT5G61620_col_a	2251	MYB-related	AT5G61620	AT5G61620
175	MYBrelated_tnt-AT5G61620_col_a	916	MYB-related	AT5G61620	AT5G61620		175	bZIP_tnt-GBF3_col	2218	bZIP	AT2G46270	GBF3
176	bZIP_tnt-bZIP52_col_v31	914	bZIP	AT1G06850	bZIP52		176	HSF_tnt-HSFC1_col_a	2207	HSF	AT3G24520	HSFC1
177	bZIP_tnt-ABI5_col_v3h	892	bZIP	AT2G36270	ABI5		177	NAC_tnt-ANAC046_col	2201	NAC	AT3G04060	ANAC046
178	AP2EREBP_tnt-RAP212_col_a	892	AP2-EREBP	AT1G53910	RAP212		178	NAC_tnt-NAM_col_v3a	2180	NAC	AT1G52880	NAM
179	bZIP_tnt-AREB3_col_v31	890	bZIP	AT3G56850	AREB3		179	AP2EREBP_tnt-ERF11_col_b	2166	AP2-EREBP	AT1G28370	ERF11
180	NAC_tnt-ANAC103_col_a	890	NAC	AT5G64060	ANAC103		180	WRKY_tnt-WRKY14_col_a	2153	WRKY	AT1G30650	WRKY14
181	BZR_tnt-At1g78700_col_a	889	BZR	AT1G78700	At1g78700		181	NAC_tnt-ANAC042_col_a	2126	NAC	AT2G43000	ANAC042
182	CPP_tnt-TCX2_col_a	888	CPP	AT4G14770	TCX2		182	ZFHD_tnt-ATHB34_col_a	2123	ZF-HD	AT3G28920	ATHB34
183	C2C2dof_tnt-AT3G52440_col_a	885	C2C2-DOF	AT3G52440	AT3G52440		183	LOBAS2_tnt-LBD18_col_a	2087	LOBAS2	AT2G45420	LBD18
184	AP2EREBP_tnt-ERF11_col_b	881	AP2-EREBP	AT1G28370	ERF11		184	AP2EREBP_tnt-RAP212_col_a	2046	AP2-EREBP	AT1G53910	RAP212
185	SBP_tnt-SPL5_col_a	864	SBP	AT3G15270	SPL5		185	BZR_tnt-At1g78700_col_a	2036	BZR	AT1G78700	At1g78700
186	NAC_tnt-ANAC075_col_a	859	NAC	AT4G29230	ANAC075		186	NAC_tnt-ANAC057_col_a	2034	NAC	AT3G17730	ANAC057
187	Trihelix_tnt-At3g14180_col	856	Trihelix	AT3G14180	At3g14180		187	NAC_tnt-ANAC062_col	2012	NAC	AT3G49530	ANAC062
188	MYB_tnt-MYB3R5_col_a	852	MYB	AT5G02320	MYB3R5		188	AP2EREBP_tnt-ERF8_col_a	1998	AP2-EREBP	AT1G53170	ERF8
189	bZIP_tnt-TGA1_col	849	bZIP	AT5G65210	TGA1		189	Trihelix_tnt-At3g14180_col	1997	Trihelix	AT3G14180	At3g14180
190	C2H2_tnt-AT5G22990_col_a	849	C2H2	AT5G22990	AT5G22990		190	AP2EREBP_tnt-ERF38_col_a	1949	AP2-EREBP	AT2G35700	ERF38
191	NAC_tnt-ANAC042_col_a	842	NAC	AT2G43000	ANAC042		191	CPP_tnt-SOL1_col	1936	CPP	AT3G22760	SOL1
192	NAC_tnt-NTM2_col_b	839	NAC	AT4G01550	NTM2		192	MYBrelated_tnt-LCL1_col	1933	MYB-related	AT5G02840	LCL1
193	G2like_tnt-AT2G40260_col_a	839	G2-like	AT2G40260	AT2G40260		193	G2like_tnt-AT2G40260_col_a	1921	G2-like	AT2G40260	AT2G40260
194	bZIP_tnt-TGA9_col_a	824	bZIP	AT1G08320	TGA9		194	bZIP_tnt-bZIP18_col_v31	1919	bZIP	AT2G40620	bZIP18
195	NAC_tnt-ANAC057_col_a	819	NAC	AT3G17730	ANAC057		195	CPP_tnt-TCX2_col_a	1910	CPP	AT4G14770	TCX2
196	AP2EREBP_tnt-ERF38_col_a	810	AP2-EREBP	AT2G35700	ERF38		196	AP2EREBP_tnt-CBF3_col_a	1879	AP2-EREBP	AT4G25480	CBF3
197	AP2EREBP_tnt-ERF8_col_a	792	AP2-EREBP	AT1G53170	ERF8		197	NAC_tnt-NAP_col_v3a	1842	NAC	AT1G69490	NAP
198	HSF_tnt-HSFC1_col_a	779	HSF	AT3G24520	HSFC1		198	G2like_tnt-At5g29000_col_a	1814	G2-like	AT5G29000	At5g29000
199	AP2EREBP_tnt-CBF3_col_a	771	AP2-EREBP	AT4G25480	CBF3		199	bZIP_tnt-TGA1_col	1800	bZIP	AT5G65210	TGA1
200	bZIP_tnt-bZIP50_col_v31	763	bZIP	AT1G77920	bZIP50		200	bZIP_tnt-TGA9_col_a	1797	bZIP	AT1G08320	TGA9
201	NAC_tnt-ANAC062_col	762	NAC	AT3G49530	ANAC062		201	mTERF_tnt-AT5G23930_col_a	1767	mTERF	AT5G23930	AT5G23930
202	WRKY_tnt-WRKY29_col_a	744	WRKY	AT4G23550	WRKY29		202	MYB_tnt-MYB93_col_a	1760	MYB	AT1G34670	MYB93
203	NAC_tnt-NAP_col_v3a	735	NAC	AT1G69490	NAP		203	bZIP_tnt-ABI5_col_v3h	1759	bZIP	AT2G36270	ABI5
204	C2H2_tnt-JKD_col_a	725	C2H2	AT5G03150	JKD		204	MYBrelated_tnt-At5g08520_col_b	1756	MYB-related	AT5G08520	At5g08520
205	bZIP_tnt-TGA4_col_a	723	bZIP	AT5G10030	TGA4		205	bZIP_tnt-AREB3_col_v31	1705	bZIP	AT3G56850	AREB3
206	bZIP_tnt-TGA3_col	707	bZIP	AT1G22070	TGA3		206	bZIP_tnt-TGA4_col_a	1691	bZIP	AT5G10030	TGA4
207	MYB_tnt-MYB93_col_a	706	MYB	AT1G34670	MYB93		207	AP2EREBP_tnt-At4g32800_col	1668	AP2-EREBP	AT4G32800	At4g32800
208	LOBAS2_tnt-LBD18_col_a	694	LOBAS2	AT2G45420	LBD18		208	C2H2_tnt-AT5G22990_col_a	1628	C2H2	AT5G22990	AT5G22990
209	MYB_tnt-MYB3R4_col_a	685	MYB	AT5G11510	MYB3R4		209	AP2EREBP_tnt-CRF10_col100_a	1628	AP2-EREBP	AT1G68550	CRF10
210	CPP_tnt-AT2G20110_col_a	678	CPP	AT2G20110	AT2G20110		210	AP2EREBP_tnt-ERF4_col_a	1624	AP2-EREBP	AT3G15210	ERF4
211	G2like_tnt-At5g29000_col_a	659	G2-like	AT5G29000	At5g29000		211	AP2EREBP_tnt-DREB19_col_a	1607	AP2-EREBP	AT2G38340	DREB19
212	AP2EREBP_tnt-ERF4_col_a	657	AP2-EREBP	AT3G15210	ERF4		212	C2C2gata_tnt-GATA15_col_b	1598	C2C2-GATA	AT3G06740	GATA15
213	mTERF_tnt-AT5G23930_col_a	647	mTERF	AT5G23930	AT5G23930		213	C2H2_tnt-WIP5_col_a	1588	C2H2	AT1G51220	WIP5
214	ZFHD_tnt-ATHB24_col_a	645	ZF-HD	AT2G18350	ATHB24		214	SBP_tnt-SPL1_col_a	1576	SBP	AT2G47070	SPL1
215	NAC_tnt-CUC2_col	641	NAC	AT5G53950	CUC2		215	bZIP_tnt-bZIP50_col_v31	1573	bZIP	AT1G77920	bZIP50
216	CAMTA_tnt-CAMTA1_col_a	634	CAMTA	AT5G09410	CAMTA1		216	AP2EREBP_tnt-At2g33710_col	1553	AP2-EREBP	AT2G33710	At2g33710
217	AP2EREBP_tnt-At2g33710_col	634	AP2-EREBP	AT2G33710	At2g33710		217	bZIP_tnt-TGA3_col	1531	bZIP	AT1G22070	TGA3
218	AP2EREBP_tnt-At4g32800_col	631	AP2-EREBP	AT4G32800	At4g32800		218	NAC_tnt-ANAC017_col	1523	NAC	AT1G34190	ANAC017
219	NAC_tnt-ANAC017_col	626	NAC	AT1G34190	ANAC017		219	MYB_tnt-MYB61_col_a	1501	MYB	AT1G09540	MYB61
220	WRKY_tnt-WRKY27_col_a	621	WRKY	AT5G52830	WRKY27		220	MYB_tnt-MYB3R5_col_a	1474	MYB	AT5G02320	MYB3R5
221	bZIP_tnt-bZIP18_col_v31	620	bZIP	AT2G40620	bZIP18		221	ZFHD_tnt-ATHB24_col_a	1473	ZF-HD	AT2G18350	ATHB24
222	SBP_tnt-SPL1_col_a	615	SBP	AT2G47070	SPL1		222	CPP_tnt-AT2G20110_col_a	1471	CPP	AT2G20110	AT2G20110
223	MYB_tnt-MYB81_col_a	612	MYB	AT2G26960	MYB81		223	NAC_tnt-CUC2_col	1462	NAC	AT5G53950	CUC2
224	ND_tnt-FRS9_col_a	606	ND	AT4G38170	FRS9		224	MYB_tnt-MYB63_col_a	1452	MYB	AT1G79180	MYB63
225	MYB_tnt-MYB65_col200_a	602	MYB	AT3G11440	MYB65		225	WRKY_tnt-WRKY29_col_a	1436	WRKY	AT4G23550	WRKY29
226	C2H2_tnt-At5g66730_col	599	C2H2	AT5G66730	At5g66730		226	TCP_tnt-TCP24_col	1419	TCP	AT1G30210	TCP24
227	AP2EREBP_tnt-DREB19_col_a	598	AP2-EREBP	AT2G38340	DREB19		227	ND_tnt-FRS9_col_a	1391	ND	AT4G38170	FRS9
228	NAC_tnt-VND3_col	594	NAC	AT5G66300	VND3		228	AP2EREBP_tnt-ESE3_col_a	1384	AP2-EREBP	AT5G25190	ESE3
229	MYB_tnt-MYB61_col_a	587	MYB	AT1G09540	MYB61		229	MYB_tnt-MYB13_col_a	1358	MYB	AT1G06180	MYB13
230	TCP_tnt-At5g08330_col_a	579	TCP	AT5G08330	At5g08330		230	MYB_tnt-MYB81_col_a	1347	MYB	AT2G26960	MYB81
231	MYBrelated_tnt-At5g52660_col_a	578	MYB-related	AT5G52660	At5g52660		231	NAC_tnt-VND3_col	1346	NAC	AT5G66300	VND3
232	AP2EREBP_tnt-CRF10_col100_a	576	AP2-EREBP	AT1G68550	CRF10		232	AP2EREBP_tnt-RRTF1_col_a	1337	AP2-EREBP	AT4G34410	RRTF1
233	bZIP_tnt-TGA5_col_v3a	560	bZIP	AT5G06960	TGA5		233	NAC_tnt-CUC1_col_v31	1328	NAC	AT3G15170	CUC1
234	bZIP_tnt-TGA2_col	560	bZIP	AT5G06950	TGA2		234	MYB_tnt-MYB65_col200_a	1323	MYB	AT3G11440	MYB65
235	MYB_tnt-MYB63_col_a	554	MYB	AT1G79180	MYB63		235	TCP_tnt-At5g08330_col_a	1316	TCP	AT5G08330	At5g08330
236	TCP_tnt-TCP24_col	552	TCP	AT1G30210	TCP24		236	MYBrelated_tnt-At5g52660_col_a	1313	MYB-related	AT5G52660	At5g52660
237	C2H2_tnt-AT2G15740_col_a	550	C2H2	AT2G15740	AT2G15740		237	C2H2_tnt-JKD_col_a	1308	C2H2	AT5G03150	JKD
238	MYB_tnt-MYB13_col_a	549	MYB	AT1G06180	MYB13		238	AP2EREBP_tnt-ERF10_col_a	1294	AP2-EREBP	AT1G03800	ERF10
239	NAC_tnt-CUC1_col_v31	547	NAC	AT3G15170	CUC1		239	WRKY_tnt-WRKY27_col_a	1293	WRKY	AT5G52830	WRKY27
240	NAC_tnt-ANAC079_col	545	NAC	AT5G07680	ANAC079		240	AP2EREBP_tnt-CBF2_col_a	1274	AP2-EREBP	AT4G25470	CBF2
241	AP2EREBP_tnt-RRTF1_col_a	545	AP2-EREBP	AT4G34410	RRTF1		241	CAMTA_tnt-CAMTA1_col_a	1273	CAMTA	AT5G09410	CAMTA1
242	MYBrelated_tnt-AT1G72740_col_a	544	MYB-related	AT1G72740	AT1G72740		242	AP2EREBP_tnt-At1g22810_col	1264	AP2-EREBP	AT1G22810	At1g22810
243	C2H2_tnt-WIP5_col_a	543	C2H2	AT1G51220	WIP5		243	AP2EREBP_tnt-DEAR3_col_a	1242	AP2-EREBP	AT2G23340	DEAR3
244	C2H2_tnt-SGR5_col_a	541	C2H2	AT2G01940	SGR5		244	ABI3VP1_tnt-NGA4_col_a	1227	ABI3-VP1	AT4G01500	NGA4
245	MYBrelated_tnt-At5g08520_col_b	537	MYB-related	AT5G08520	At5g08520		245	MYBrelated_tnt-At5g05790_col_a	1210	MYB-related	AT5G05790	At5g05790
246	NAC_tnt-ANAC092_col_v3a	521	NAC	AT5G39610	ANAC092		246	NAC_tnt-ANAC079_col	1205	NAC	AT5G07680	ANAC079
247	WRKY_tnt-WRKY20_col_a	512	WRKY	AT4G26640	WRKY20		247	NAC_tnt-ANAC092_col_v3a	1196	NAC	AT5G39610	ANAC092
248	bZIP_tnt-GBF5_col_v3a	501	bZIP	AT2G18160	GBF5		248	MYBrelated_tnt-AT1G72740_col_a	1191	MYB-related	AT1G72740	AT1G72740
249	AP2EREBP_tnt-ERF10_col_a	484	AP2-EREBP	AT1G03800	ERF10		249	C2H2_tnt-AT2G15740_col_a	1189	C2H2	AT2G15740	AT2G15740
250	AP2EREBP_tnt-At4g31060_col_a	478	AP2-EREBP	AT4G31060	At4g31060		250	AP2EREBP_tnt-At4g31060_col_a	1189	AP2-EREBP	AT4G31060	At4g31060
251	bZIP_tnt-bZIP44_col	477	bZIP	AT1G75390	bZIP44		251	Orphan_tnt-AT1G24250_col_a	1187	Orphan	AT1G24250	AT1G24250
252	Orphan_tnt-AT1G24250_col_a	477	Orphan	AT1G24250	AT1G24250		252	AP2EREBP_tnt-DEAR2_col_a	1170	AP2-EREBP	AT5G67190	DEAR2
253	AP2EREBP_tnt-ESE3_col_a	474	AP2-EREBP	AT5G25190	ESE3		253	MYB_tnt-MYB27_col_a	1166	MYB	AT3G53200	MYB27
254	BES1_tnt-BAM8_col_a	463	BES1	AT5G45300	BAM8		254	ABI3VP1_tnt-FUS3_col_a	1155	ABI3-VP1	AT3G26790	FUS3
255	zfGRF_tnt-AT3G42860_col_a	454	zf-GRF	AT3G42860	AT3G42860		255	C2H2_tnt-At5g66730_col	1142	C2H2	AT5G66730	At5g66730
256	MYB_tnt-MYB121_col_a	446	MYB	AT3G30210	MYB121		256	MYB_tnt-MYB3R4_col_a	1121	MYB	AT5G11510	MYB3R4
257	Homeobox_tnt-PDF2_col	445	Homeobox	AT4G04890	PDF2		257	bZIP_tnt-TGA5_col_v3a	1101	bZIP	AT5G06960	TGA5
258	bZIP_tnt-ABF2_col_v3a	437	bZIP	AT1G45249	ABF2		258	C2H2_tnt-SGR5_col_a	1069	C2H2	AT2G01940	SGR5
259	MYB_tnt-MYB27_col_a	436	MYB	AT3G53200	MYB27		259	WRKY_tnt-WRKY20_col_a	1065	WRKY	AT4G26640	WRKY20
260	C2C2gata_tnt-GATA11_col_a	436	C2C2-GATA	AT1G08010	GATA11		260	bZIP_tnt-TGA2_col	1062	bZIP	AT5G06950	TGA2
261	SBP_tnt-SPL14_col_a	435	SBP	AT1G20980	SPL14		261	SBP_tnt-SPL14_col_a	1042	SBP	AT1G20980	SPL14
262	AP2EREBP_tnt-DEAR2_col_a	430	AP2-EREBP	AT5G67190	DEAR2		262	MADS_tnt-AGL15_col_a	1008	MADS	AT5G13790	AGL15
263	WRKY_tnt-WRKY7_col	423	WRKY	AT4G24240	WRKY7		263	NAC_tnt-ANAC087_col_v3a	994	NAC	AT5G18270	ANAC087
264	E2FDP_tnt-DEL2_col_a	419	E2F-DP	AT5G14960	DEL2		264	TCP_tnt-At1g72010_col	983	TCP	AT1G72010	At1g72010
265	C2C2gata_tnt-GATA15_col_b	418	C2C2-GATA	AT3G06740	GATA15		265	bZIP_tnt-bZIP44_col	977	bZIP	AT1G75390	bZIP44
266	bZIP_tnt-bZIP16_col_v3a	417	bZIP	AT2G35530	bZIP16		266	C2C2gata_tnt-GATA11_col_a	975	C2C2-GATA	AT1G08010	GATA11
267	AP2EREBP_tnt-At1g22810_col	412	AP2-EREBP	AT1G22810	At1g22810		267	Homeobox_tnt-PDF2_col	970	Homeobox	AT4G04890	PDF2
268	TCP_tnt-At1g72010_col	411	TCP	AT1G72010	At1g72010		268	AP2EREBP_tnt-DDF1_col_a	957	AP2-EREBP	AT1G12610	DDF1
269	WRKY_tnt-WRKY21_col	409	WRKY	AT2G30590	WRKY21		269	bZIP_tnt-GBF5_col_v3a	956	bZIP	AT2G18160	GBF5
270	AP2EREBP_tnt-CBF2_col_a	403	AP2-EREBP	AT4G25470	CBF2		270	BES1_tnt-BAM8_col_a	954	BES1	AT5G45300	BAM8
271	bZIP_tnt-bZIP28_col_a	396	bZIP	AT3G10800	bZIP28		271	zfGRF_tnt-AT3G42860_col_a	935	zf-GRF	AT3G42860	AT3G42860
272	AP2EREBP_tnt-DEAR3_col_a	389	AP2-EREBP	AT2G23340	DEAR3		272	WRKY_tnt-WRKY7_col	933	WRKY	AT4G24240	WRKY7
273	NAC_tnt-ANAC087_col_v3a	386	NAC	AT5G18270	ANAC087		273	MYB_tnt-MYB121_col_a	927	MYB	AT3G30210	MYB121
274	MADS_tnt-AGL15_col_a	385	MADS	AT5G13790	AGL15		274	AP2EREBP_tnt-DEAR5_col_a	910	AP2-EREBP	AT4G06746	DEAR5
275	MYBrelated_tnt-At5g05790_col_a	373	MYB-related	AT5G05790	At5g05790		275	AP2EREBP_tnt-ERF3_col_a	881	AP2-EREBP	AT1G50640	ERF3
276	AP2EREBP_tnt-ERF105_col	369	AP2-EREBP	AT5G51190	ERF105		276	C2H2_tnt-JGL_col_a	870	C2H2	AT1G13400	JGL
277	C2H2_tnt-MGP_col_a	359	C2H2	AT1G03840	MGP		277	C2C2gata_tnt-GATA12_col_a	840	C2C2-GATA	AT5G25830	GATA12
278	AP2EREBP_tnt-RAP211_col_a	356	AP2-EREBP	AT5G19790	RAP2-11		278	bZIP_tnt-ABF2_col_v3a	835	bZIP	AT1G45249	ABF2
279	bHLH_tnt-bHLH31_col	354	bHLH	AT1G59640	bHLH31		279	MYB_tnt-BOS1_col_a	827	MYB	AT3G06490	BOS1
280	FAR1_tnt-FAR1_col_a	349	FAR1	AT4G15090	FAR1		280	AP2EREBP_tnt-ERF105_col	816	AP2-EREBP	AT5G51190	ERF105
281	E2FDP_tnt-E2FA_col_a	346	E2F-DP	AT2G36010	E2FA		281	PLATZ_tnt-AT2G01818_col_a	809	PLATZ	AT2G01818	AT2G01818
282	MYB_tnt-BOS1_col_a	345	MYB	AT3G06490	BOS1		282	AP2EREBP_tnt-RAP211_col_a	801	AP2-EREBP	AT5G19790	RAP2-11
283	TCP_tnt-TCP3_col	342	TCP	AT1G53230	TCP3		283	E2FDP_tnt-E2FA_col_a	766	E2F-DP	AT2G36010	E2FA
284	AP2EREBP_tnt-ERF3_col_a	334	AP2-EREBP	AT1G50640	ERF3		284	AP2EREBP_tnt-DREB2_col_a	742	AP2-EREBP	AT5G05410	DREB2
285	C2C2gata_tnt-GATA12_col_a	328	C2C2-GATA	AT5G25830	GATA12		285	WRKY_tnt-WRKY21_col	734	WRKY	AT2G30590	WRKY21
286	C2H2_tnt-AtIDD11_col_a	319	C2H2	AT3G13810	AtIDD11		286	bZIP_tnt-bZIP16_col_v3a	731	bZIP	AT2G35530	bZIP16
287	AP2EREBP_tnt-DDF1_col_a	295	AP2-EREBP	AT1G12610	DDF1		287	MYBrelated_tnt-At3g11280_col_a	729	MYB-related	AT3G11280	At3g11280
288	AP2EREBP_tnt-DEAR5_col_a	288	AP2-EREBP	AT4G06746	DEAR5		288	AP2EREBP_tnt-At5g18450_col_a	722	AP2-EREBP	AT5G18450	At5g18450
289	WRKY_tnt-WRKY3_col_a	287	WRKY	AT2G03340	WRKY3		289	bZIP_tnt-bZIP28_col_a	712	bZIP	AT3G10800	bZIP28
290	C2H2_tnt-JGL_col_a	285	C2H2	AT1G13400	JGL		290	TCP_tnt-TCP3_col	709	TCP	AT1G53230	TCP3
291	PLATZ_tnt-AT2G01818_col_a	278	PLATZ	AT2G01818	AT2G01818		291	MYB_tnt-MYB99_col_a	706	MYB	AT5G62320	MYB99
292	ABI3VP1_tnt-NGA4_col_a	278	ABI3-VP1	AT4G01500	NGA4		292	bHLH_tnt-bHLH31_col	701	bHLH	AT1G59640	bHLH31
293	ABI3VP1_tnt-FUS3_col_a	264	ABI3-VP1	AT3G26790	FUS3		293	C2H2_tnt-AtIDD11_col_a	697	C2H2	AT3G13810	AtIDD11
294	MYB_tnt-MYB10_col_a	260	MYB	AT3G12820	MYB10		294	AP2EREBP_tnt-ABR1_col_a	693	AP2-EREBP	AT5G64750	ABR1
295	MYB_tnt-MYB96_col_b	257	MYB	AT5G62470	MYB96		295	ND_tnt-AT2G28920_col_a	682	ND	AT2G28920	AT2G28920
296	MYB_tnt-MYB99_col_a	252	MYB	AT5G62320	MYB99		296	C2H2_tnt-MGP_col_a	670	C2H2	AT1G03840	MGP
297	AP2EREBP_tnt-ABR1_col_a	250	AP2-EREBP	AT5G64750	ABR1		297	E2FDP_tnt-DEL2_col_a	659	E2F-DP	AT5G14960	DEL2
298	WRKY_tnt-WRKY11_col_a	245	WRKY	AT4G31550	WRKY11		298	AP2EREBP_tnt-RAP26_col_a	653	AP2-EREBP	AT1G43160	RAP2-6
299	MYB_tnt-MYB30_col_a	245	MYB	AT3G28910	MYB30		299	AP2EREBP_tnt-RAP21_col_a	642	AP2-EREBP	AT1G46768	RAP2-1
300	MYB_tnt-MYB56_col_a	242	MYB	AT5G17800	MYB56		300	MYB_tnt-MYB30_col_a	638	MYB	AT3G28910	MYB30
301	AP2EREBP_tnt-At5g18450_col_a	240	AP2-EREBP	AT5G18450	At5g18450		301	MYB_tnt-MYB96_col_b	615	MYB	AT5G62470	MYB96
302	ND_tnt-AT2G28920_col_a	239	ND	AT2G28920	AT2G28920		302	AP2EREBP_tnt-TINY_col_a	607	AP2-EREBP	AT5G25810	TINY
303	AP2EREBP_tnt-ERF115_col_a	237	AP2-EREBP	AT5G07310	ERF115		303	AP2EREBP_tnt-ERF115_col_a	607	AP2-EREBP	AT5G07310	ERF115
304	Trihelix_tnt-GT3a_col_a	236	Trihelix	AT5G01380	GT3a		304	AP2EREBP_tnt-AT1G44830_col_a	606	AP2-EREBP	AT1G44830	AT1G44830
305	AP2EREBP_tnt-RAP21_col_a	235	AP2-EREBP	AT1G46768	RAP2-1		305	HSF_tnt-HSF6_col_a	605	HSF	AT5G62020	HSF6
306	AP2EREBP_tnt-RAP26_col_a	232	AP2-EREBP	AT1G43160	RAP2-6		306	FAR1_tnt-FAR1_col_a	597	FAR1	AT4G15090	FAR1
307	AP2EREBP_tnt-TINY_col_a	225	AP2-EREBP	AT5G25810	TINY		307	EIL_tnt-EIN3_col_a	590	EIL	AT3G20770	EIN3
308	Homeobox_tnt-ATHB18_col_a	219	Homeobox	AT1G70920	ATHB18		308	MYB_tnt-MYB10_col_a	583	MYB	AT3G12820	MYB10
309	C2H2_tnt-NUC_col_a	219	C2H2	AT5G44160	NUC		309	bZIP_tnt-VIP1_col_v3a	568	bZIP	AT1G43700	VIP1
310	TCP_tnt-At1g69690_col_a	214	TCP	AT1G69690	At1g69690		310	WRKY_tnt-WRKY3_col_a	568	WRKY	AT2G03340	WRKY3
311	HSF_tnt-HSF6_col_a	209	HSF	AT5G62020	HSF6		311	AP2EREBP_tnt-At5g65130_col_a	563	AP2-EREBP	AT5G65130	At5g65130
312	HSF_tnt-HSF7_col_a	203	HSF	AT4G11660	HSF7		312	Homeobox_tnt-ATHB18_col_a	559	Homeobox	AT1G70920	ATHB18
313	RWPRK_tnt-RKD2_col_a	202	RWP-RK	AT1G74480	RKD2		313	MYB_tnt-MYB94_col_b	541	MYB	AT3G47600	MYB94
314	EIL_tnt-EIN3_col_a	200	EIL	AT3G20770	EIN3		314	LOBAS2_tnt-LBD23_col_a	535	LOBAS2	AT3G26620	LBD23
315	TCP_tnt-TCP7_col_a	199	TCP	AT5G23280	TCP7		315	HSF_tnt-HSF7_col_a	515	HSF	AT4G11660	HSF7
316	bZIP_tnt-VIP1_col_v3a	196	bZIP	AT1G43700	VIP1		316	RWPRK_tnt-RKD2_col_a	513	RWP-RK	AT1G74480	RKD2
317	AP2EREBP_tnt-DREB2_col_a	196	AP2-EREBP	AT5G05410	DREB2		317	WRKY_tnt-WRKY11_col_a	509	WRKY	AT4G31550	WRKY11
318	C2C2dof_tnt-dof42_col_a	195	C2C2-DOF	AT4G21030	DOF4-2		318	AP2EREBP_tnt-ERF13_col_b	497	AP2-EREBP	AT2G44840	ERF13
319	MYB_tnt-MYB94_col_b	191	MYB	AT3G47600	MYB94		319	C2H2_tnt-NUC_col_a	489	C2H2	AT5G44160	NUC
320	AP2EREBP_tnt-At5g65130_col_a	187	AP2-EREBP	AT5G65130	At5g65130		320	Trihelix_tnt-GT3a_col_a	485	Trihelix	AT5G01380	GT3a
321	AP2EREBP_tnt-AT1G44830_col_a	186	AP2-EREBP	AT1G44830	AT1G44830		321	MYB_tnt-MYB56_col_a	485	MYB	AT5G17800	MYB56
322	AP2EREBP_tnt-ERF13_col_b	185	AP2-EREBP	AT2G44840	ERF13		322	HSF_tnt-HSFA6A_col_a	452	HSF	AT5G43840	HSFA6A
323	bHLH_tnt-BIM1_col_a	184	bHLH	AT5G08130	BIM1		323	HMG_tnt-3XHMGBOX1_col_a	419	HMG	AT4G11080	3XHMGBOX1
324	WRKY_tnt-WRKY30_col_a	183	WRKY	AT5G24110	WRKY30		324	G2like_tnt-At1g13300_col_a	415	G2-like	AT1G13300	At1g13300
325	TCP_tnt-TCP20_col_a	183	TCP	AT3G27010	TCP20		325	TCP_tnt-At1g69690_col_a	411	TCP	AT1G69690	At1g69690
326	MYB_tnt-MYB39_col_a	180	MYB	AT4G17785	MYB39		326	MYB_tnt-MYB39_col_a	410	MYB	AT4G17785	MYB39
327	SBP_tnt-SPL13_col_a	176	SBP	AT5G50670	SPL13		327	SBP_tnt-SPL13_col_a	407	SBP	AT5G50670	SPL13
328	bHLH_tnt-bHLH10_col_a	171	bHLH	AT2G31220	bHLH10		328	C2C2dof_tnt-dof42_col_a	389	C2C2-DOF	AT4G21030	DOF4-2
329	MADS_tnt-AGL6_col_a	170	MADS	AT2G45650	AGL6		329	WRKY_tnt-WRKY43_col_a	382	WRKY	AT2G46130	WRKY43
330	Homeobox_tnt-HAT5_col_a	169	Homeobox	AT3G01470	HAT5		330	C2C2gata_tnt-GATA1_col_a	381	C2C2-GATA	AT3G24050	GATA1
331	C2C2gata_tnt-ZIM_col_a	169	C2C2-GATA	AT4G24470	ZIM		331	RWPRK_tnt-NLP7_col_a	376	RWP-RK	AT4G24020	NLP7
332	BZR_tnt-At4g18890_col_a	164	BZR	AT4G18890	At4g18890		332	MADS_tnt-AGL6_col_a	375	MADS	AT2G45650	AGL6
333	BBRBPC_tnt-BPC1_col_a	163	BBR/BPC	AT2G01930	BPC1		333	ND_tnt-AGL95_col_a	373	ND	AT2G15660	AGL95
334	NAC_tnt-AT1G19040_col_a	161	NAC	AT1G19040	AT1G19040		334	NAC_tnt-AT1G19040_col_a	373	NAC	AT1G19040	AT1G19040
335	LOBAS2_tnt-LBD23_col_a	159	LOBAS2	AT3G26620	LBD23		335	MYB_tnt-MYB113_col_a	373	MYB	AT1G66370	MYB113
336	MYBrelated_tnt-At3g11280_col_a	158	MYB-related	AT3G11280	At3g11280		336	bHLH_tnt-bHLH10_col_a	372	bHLH	AT2G31220	bHLH10
337	MYB_tnt-MYB113_col_a	155	MYB	AT1G66370	MYB113		337	BZR_tnt-BZR1_col_a	360	BZR	AT1G75080	BZR1
338	bZIP_tnt-bZIP48_col_a	153	bZIP	AT2G04038	bZIP48		338	BBRBPC_tnt-BPC1_col_a	360	BBR/BPC	AT2G01930	BPC1
339	WRKY_tnt-WRKY43_col_a	153	WRKY	AT2G46130	WRKY43		339	C2H2_tnt-TF3A_col_a	356	C2H2	AT1G72050	TF3A
340	HSF_tnt-HSFA6A_col_a	152	HSF	AT5G43840	HSFA6A		340	WRKY_tnt-WRKY30_col_a	352	WRKY	AT5G24110	WRKY30
341	HMG_tnt-3XHMGBOX1_col_a	146	HMG	AT4G11080	3XHMGBOX1		341	C2C2dof_tnt-AT1G47655_col_a	352	C2C2-DOF	AT1G47655	AT1G47655
342	bZIP_tnt-TGA10_col_a	143	bZIP	AT5G06839	TGA10		342	TCP_tnt-TCP20_col_a	348	TCP	AT3G27010	TCP20
343	MADS_tnt-AGL16_col_a	143	MADS	AT3G57230	AGL16		343	MYB_tnt-MYB4_col200_a	345	MYB	AT4G38620	MYB4
344	NAC_tnt-SND2_col_a	141	NAC	AT4G28500	SND2		344	C2C2gata_tnt-GATA4_col_a	340	C2C2-GATA	AT3G60530	GATA4
345	C2H2_tnt-TF3A_col_a	140	C2H2	AT1G72050	TF3A		345	BZR_tnt-At4g18890_col_a	337	BZR	AT4G18890	At4g18890
346	MYBrelated_tnt-TRP2_col_a	138	MYB-related	AT3G46590	TRP2		346	TCP_tnt-TCP7_col_a	332	TCP	AT5G23280	TCP7
347	C2C2gata_tnt-GATA1_col_a	136	C2C2-GATA	AT3G24050	GATA1		347	MADS_tnt-AGL16_col_a	329	MADS	AT3G57230	AGL16
348	C2C2gata_tnt-GATA4_col_a	134	C2C2-GATA	AT3G60530	GATA4		348	AP2EREBP_tnt-AT3G60490_col_a	324	AP2-EREBP	AT3G60490	AT3G60490
349	BZR_tnt-BZR1_col_a	132	BZR	AT1G75080	BZR1		349	Homeobox_tnt-HAT5_col_a	322	Homeobox	AT3G01470	HAT5
350	MYBrelated_tnt-TRP1_col	131	MYB-related	AT5G59430	TRP1		350	AP2EREBP_tnt-ESE1_col_a	321	AP2-EREBP	AT3G23220	ESE1
351	CAMTA_tnt-CAMTA5_col_a	131	CAMTA	AT4G16150	CAMTA5		351	MYB_tnt-MYB83_col_a	310	MYB	AT3G08500	MYB83
352	RWPRK_tnt-NLP7_col_a	128	RWP-RK	AT4G24020	NLP7		352	AP2EREBP_tnt-ERF104_col_a	309	AP2-EREBP	AT5G61600	ERF104
353	AP2EREBP_tnt-ERF104_col_a	128	AP2-EREBP	AT5G61600	ERF104		353	AP2EREBP_tnt-AT1G01250_col_a	306	AP2-EREBP	AT1G01250	AT1G01250
354	Trihelix_tnt-AT1G76870_col_b	127	Trihelix	AT1G76870	AT1G76870		354	bZIP_tnt-bZIP48_col_a	301	bZIP	AT2G04038	bZIP48
355	Trihelix_tnt-AT3G10030_col_a	126	Trihelix	AT3G10030	AT3G10030		355	C2C2gata_tnt-ZML1_col_a	296	C2C2-GATA	AT3G21175	ZML1
356	AP2EREBP_tnt-ESE1_col_a	118	AP2-EREBP	AT3G23220	ESE1		356	DBP_tnt-AT3G51470_col_a	295	DBP	AT3G51470	AT3G51470
357	AP2EREBP_tnt-At2g44940_col_a	118	AP2-EREBP	AT2G44940	At2g44940		357	MYB_tnt-MYB51_col_a	294	MYB	AT1G18570	MYB51
358	AP2EREBP_tnt-AT3G60490_col_a	118	AP2-EREBP	AT3G60490	AT3G60490		358	MYBrelated_tnt-At5g58900_col_a	292	MYB-related	AT5G58900	At5g58900
359	G2like_tnt-At1g13300_col_a	115	G2-like	AT1G13300	At1g13300		359	NAC_tnt-SND2_col_a	285	NAC	AT4G28500	SND2
360	MYB_tnt-MYB101_col_a	114	MYB	AT2G32460	MYB101		360	C2C2gata_tnt-ZIM_col_a	285	C2C2-GATA	AT4G24470	ZIM
361	G2like_tnt-AT2G38300_col_a	114	G2-like	AT2G38300	AT2G38300		361	bHLH_tnt-BIM1_col_a	278	bHLH	AT5G08130	BIM1
362	HB_tnt-HDG7_col_a	111	HB	AT5G52170	HDG7		362	bHLH_tnt-bHLH157_col_a	277	bHLH	AT1G64625	bHLH157
363	NAC_tnt-ANAC094_col_a	110	NAC	AT5G39820	ANAC094		363	CAMTA_tnt-CAMTA5_col_a	267	CAMTA	AT4G16150	CAMTA5
364	MYBrelated_tnt-At5g58900_col_a	110	MYB-related	AT5G58900	At5g58900		364	Trihelix_tnt-AT1G76870_col_b	266	Trihelix	AT1G76870	AT1G76870
365	MYB_tnt-MYB51_col_a	110	MYB	AT1G18570	MYB51		365	AP2EREBP_tnt-ERF9_col_a	265	AP2-EREBP	AT5G44210	ERF9
366	ND_tnt-AGL95_col_a	107	ND	AT2G15660	AGL95		366	MADS_tnt-AGL25_col_a	263	MADS	AT5G10140	AGL25
367	MYB_tnt-MYB4_col200_a	106	MYB	AT4G38620	MYB4		367	LOBAS2_tnt-LOB_col_a	263	LOBAS2	AT5G63090	LOB
368	bHLH_tnt-bHLH157_col_a	102	bHLH	AT1G64625	bHLH157		368	HSF_tnt-HSF21_col_a	261	HSF	AT4G18880	HSF21
369	HSF_tnt-HSFA1E_col_a	99	HSF	AT3G02990	HSFA1E		369	HSF_tnt-HSFA1E_col_a	260	HSF	AT3G02990	HSFA1E
370	AP2EREBP_tnt-AT1G01250_col_a	94	AP2-EREBP	AT1G01250	AT1G01250		370	bZIP_tnt-TGA10_col_a	259	bZIP	AT5G06839	TGA10
371	AP2EREBP_tnt-ERF1_col_a	93	AP2-EREBP	AT3G23240	ERF1		371	AP2EREBP_tnt-AIL7_col_a	258	AP2-EREBP	AT5G65510	AIL7
372	AP2EREBP_tnt-At1g36060_col_a	93	AP2-EREBP	AT1G36060	At1g36060		372	NAC_tnt-ANAC094_col_a	255	NAC	AT5G39820	ANAC094
373	MYB_tnt-MYB83_col_a	92	MYB	AT3G08500	MYB83		373	G2like_tnt-AT2G38300_col_a	254	G2-like	AT2G38300	AT2G38300
374	AP2EREBP_tnt-ERF9_col_a	90	AP2-EREBP	AT5G44210	ERF9		374	C3H_tnt-At5g08750_col_a	254	C3H	AT5G08750	At5g08750
375	C2C2COlike_tnt-AT5G59990_col_a	87	C2C2-CO-like	AT5G59990	AT5G59990		375	AP2EREBP_tnt-AT1G28160_col_a	246	AP2-EREBP	AT1G28160	AT1G28160
376	WRKY_tnt-WRKY42_col_a	86	WRKY	AT4G04450	WRKY42		376	MYBrelated_tnt-TRP1_col	244	MYB-related	AT5G59430	TRP1
377	MADS_tnt-AGL25_col_a	86	MADS	AT5G10140	AGL25		377	MYB_tnt-MYB101_col_a	242	MYB	AT2G32460	MYB101
378	C2C2dof_tnt-AT1G47655_col_a	85	C2C2-DOF	AT1G47655	AT1G47655		378	NLP_tnt-AtNLP4_col_b	239	NLP	AT1G20640	AtNLP4
379	Trihelix_tnt-AT1G76880_col_a	84	Trihelix	AT1G76880	AT1G76880		379	AP2EREBP_tnt-At1g36060_col_a	230	AP2-EREBP	AT1G36060	At1g36060
380	HSF_tnt-HSF21_col_a	83	HSF	AT4G18880	HSF21		380	AP2EREBP_tnt-At2g44940_col_a	223	AP2-EREBP	AT2G44940	At2g44940
381	AP2EREBP_tnt-AT1G28160_col_a	81	AP2-EREBP	AT1G28160	AT1G28160		381	AP2EREBP_tnt-AT3G16280_col_a	223	AP2-EREBP	AT3G16280	AT3G16280
382	bHLH_tnt-BIM3_col_a	80	bHLH	AT5G38860	BIM3		382	Trihelix_tnt-AT3G10030_col_a	220	Trihelix	AT3G10030	AT3G10030
383	E2FDP_tnt-DEL1_col_a	79	E2F-DP	AT3G48160	DEL1		383	C2C2gata_tnt-ZML2_col_a	220	C2C2-GATA	AT1G51600	ZML2
384	C3H_tnt-At5g08750_col_a	79	C3H	AT5G08750	At5g08750		384	MYBrelated_tnt-TRP2_col_a	219	MYB-related	AT3G46590	TRP2
385	AP2EREBP_tnt-AIL7_col_a	78	AP2-EREBP	AT5G65510	AIL7		385	AP2EREBP_tnt-At4g28140_col_a	210	AP2-EREBP	AT4G28140	At4g28140
386	DBP_tnt-AT3G51470_col_a	76	DBP	AT3G51470	AT3G51470		386	AP2EREBP_tnt-ERF1_col_a	203	AP2-EREBP	AT3G23240	ERF1
387	AP2EREBP_tnt-AT3G16280_col_a	76	AP2-EREBP	AT3G16280	AT3G16280		387	C2C2gata_tnt-GATA14_col_a	201	C2C2-GATA	AT3G45170	GATA14
388	MYB_tnt-MYB41_col_a	74	MYB	AT4G28110	MYB41		388	HB_tnt-HDG7_col_a	191	HB	AT5G52170	HDG7
389	C2H2_tnt-At1g14580_col_a	71	C2H2	AT1G14580	At1g14580		389	ABI3VP1_tnt-AT5G25475_col_a	191	ABI3-VP1	AT5G25475	AT5G25475
390	WRKY_tnt-WRKY31_col_a	70	WRKY	AT4G22070	WRKY31		390	Trihelix_tnt-AT3G58630_col_a	187	Trihelix	AT3G58630	AT3G58630
391	AP2EREBP_tnt-ERF73_col_a	70	AP2-EREBP	AT1G72360	ERF73		391	Orphan_tnt-AT1G23810_col_a	183	Orphan	AT1G23810	AT1G23810
392	SBP_tnt-SPL15_col_a	69	SBP	AT3G57920	SPL15		392	AP2EREBP_tnt-DREB26_col_a	177	AP2-EREBP	AT1G21910	DREB26
393	AP2EREBP_tnt-ERF2_col_a	69	AP2-EREBP	AT5G47220	ERF2		393	AP2EREBP_tnt-PLT3_col_a	176	AP2-EREBP	AT5G10510	PLT3
394	bZIP_tnt-bZIP42_col_a	68	bZIP	AT3G30530	bZIP42		394	SRS_tnt-SRS7_col_a	170	SRS	AT1G19790	SRS7
395	Trihelix_tnt-GT1_col_a	68	Trihelix	AT1G13450	GT1		395	AP2EREBP_tnt-ERF5_col_a	168	AP2-EREBP	AT5G47230	ERF5
396	G2like_tnt-At3g12730_col_a	68	G2-like	AT3G12730	At3g12730		396	LOBAS2_tnt-LBD13_col_a	167	LOBAS2	AT2G30340	LBD13
397	AP2EREBP_tnt-ERF5_col_a	67	AP2-EREBP	AT5G47230	ERF5		397	ARID_tnt-At1g76110_col_a	163	ARID	AT1G76110	At1g76110
398	MYB_tnt-MYB62_col_a	66	MYB	AT1G68320	MYB62		398	Trihelix_tnt-GT1_col_a	162	Trihelix	AT1G13450	GT1
399	TCP_tnt-PTF1_col_a	63	TCP	AT3G02150	PTF1		399	MYB_tnt-ATY19_col_a	159	MYB	AT3G23250	ATY19
400	LOBAS2_tnt-LOB_col_a	63	LOBAS2	AT5G63090	LOB		400	MYB_tnt-MYB41_col_a	158	MYB	AT4G28110	MYB41
401	BSD_tnt-AT1G10720_col_a	63	BSD	AT1G10720	AT1G10720		401	AP2EREBP_tnt-DDF2_col_a	158	AP2-EREBP	AT1G63030	DDF2
402	AP2EREBP_tnt-AT4G18450_col_a	62	AP2-EREBP	AT4G18450	AT4G18450		402	AP2EREBP_tnt-At1g77640_col_a	158	AP2-EREBP	AT1G77640	At1g77640
403	MYB_tnt-ATY19_col_a	60	MYB	AT3G23250	ATY19		403	C2H2_tnt-At5g22890_col_a	149	C2H2	AT5G22890	At5g22890
404	WRKY_tnt-WRKY6_col_a	59	WRKY	AT1G62300	WRKY6		404	MADS_tnt-AGL13_col_b	148	MADS	AT3G61120	AGL13
405	MYB_tnt-MYB118_col_a	59	MYB	AT3G27785	MYB118		405	BSD_tnt-AT1G10720_col_a	147	BSD	AT1G10720	AT1G10720
406	C2C2gata_tnt-GATA14_col_a	59	C2C2-GATA	AT3G45170	GATA14		406	ABI3VP1_tnt-REM16_col_a	147	ABI3-VP1	AT4G33280	REM16
407	AP2EREBP_tnt-DDF2_col_a	57	AP2-EREBP	AT1G63030	DDF2		407	AP2EREBP_tnt-ERF2_col_a	145	AP2-EREBP	AT5G47220	ERF2
408	ARID_tnt-AT2G17410_col_a	56	ARID	AT2G17410	AT2G17410		408	C2H2_tnt-At1g14580_col_a	141	C2H2	AT1G14580	At1g14580
409	AP2EREBP_tnt-At4g28140_col_a	56	AP2-EREBP	AT4G28140	At4g28140		409	AP2EREBP_tnt-AT4G18450_col_a	141	AP2-EREBP	AT4G18450	AT4G18450
410	NLP_tnt-AtNLP4_col_b	55	NLP	AT1G20640	AtNLP4		410	ARID_tnt-At3g13350_col_a	139	ARID	AT3G13350	At3g13350
411	ABI3VP1_tnt-REM16_col_a	55	ABI3-VP1	AT4G33280	REM16		411	Trihelix_tnt-AT1G76880_col_a	137	Trihelix	AT1G76880	AT1G76880
412	bHLH_tnt-bHLH74_col_a	54	bHLH	AT1G10120	bHLH74		412	E2FDP_tnt-DEL1_col_a	137	E2F-DP	AT3G48160	DEL1
413	Trihelix_tnt-AT5G47660_col_a	53	Trihelix	AT5G47660	AT5G47660		413	ARF_tnt-ARF16_col_b	137	ARF	AT4G30080	ARF16
414	ARF_tnt-ARF16_col_b	53	ARF	AT4G30080	ARF16		414	WRKY_tnt-WRKY42_col_a	134	WRKY	AT4G04450	WRKY42
415	Trihelix_tnt-AT3G58630_col_a	52	Trihelix	AT3G58630	AT3G58630		415	SBP_tnt-SPL11_col100_a	134	SBP	AT1G27360	SPL11
416	HB_tnt-WOX11_col_a	52	HB	AT3G03660	WOX11		416	AP2EREBP_tnt-PUCHI_col_a	134	AP2-EREBP	AT5G18560	PUCHI
417	MADS_tnt-AGL13_col_b	51	MADS	AT3G61120	AGL13		417	CCAATHAP3_tnt-HAP3_col_a	133	CCAAT-HAP3	AT2G38880	HAP3
418	AP2EREBP_tnt-AT3G57600_col_a	50	AP2-EREBP	AT3G57600	AT3G57600		418	AP2EREBP_tnt-AT3G57600_col_a	133	AP2-EREBP	AT3G57600	AT3G57600
419	AP2EREBP_tnt-DREB26_col_a	49	AP2-EREBP	AT1G21910	DREB26		419	TCP_tnt-PTF1_col_a	128	TCP	AT3G02150	PTF1
420	TCP_tnt-At2g45680_col_b	48	TCP	AT2G45680	At2g45680		420	AP2EREBP_tnt-At1g75490_col_a	128	AP2-EREBP	AT1G75490	At1g75490
421	AP2EREBP_tnt-PLT3_col_a	48	AP2-EREBP	AT5G10510	PLT3		421	MYBrelated_tnt-AT1G18960_col_a	126	MYB-related	AT1G18960	AT1G18960
422	Orphan_tnt-AT1G23810_col_a	47	Orphan	AT1G23810	AT1G23810		422	MYB_tnt-MYB62_col_a	125	MYB	AT1G68320	MYB62
423	AP2EREBP_tnt-At1g75490_col_a	47	AP2-EREBP	AT1G75490	At1g75490		423	MADS_tnt-AGL42_col_a	124	MADS	AT5G62165	AGL42
424	TCP_tnt-TCP17_col_a	46	TCP	AT5G08070	TCP17		424	WRKY_tnt-WRKY31_col_a	123	WRKY	AT4G22070	WRKY31
425	SRS_tnt-SRS7_col_a	46	SRS	AT1G19790	SRS7		425	WRKY_tnt-WRKY6_col_a	121	WRKY	AT1G62300	WRKY6
426	C2H2_tnt-AT3G46070_col_a	46	C2H2	AT3G46070	AT3G46070		426	SBP_tnt-SPL15_col_a	121	SBP	AT3G57920	SPL15
427	AP2EREBP_tnt-At1g77640_col_a	45	AP2-EREBP	AT1G77640	At1g77640		427	MYB_tnt-MYB40_col_a	121	MYB	AT5G14340	MYB40
428	C2H2_tnt-At5g22890_col_a	44	C2H2	AT5G22890	At5g22890		428	ABI3VP1_tnt-AT5G18090_col_a	121	ABI3-VP1	AT5G18090	AT5G18090
429	SBP_tnt-SPL11_col100_a	43	SBP	AT1G27360	SPL11		429	C2C2COlike_tnt-AT5G59990_col_a	120	C2C2-CO-like	AT5G59990	AT5G59990
430	ND_tnt-ASHR1_col_a	43	ND	AT2G17900	ASHR1		430	ARID_tnt-AT2G17410_col_a	120	ARID	AT2G17410	AT2G17410
431	MYB_tnt-MYB23_col_a	43	MYB	AT5G40330	MYB23		431	TCP_tnt-At2g45680_col_b	118	TCP	AT2G45680	At2g45680
432	MYB_tnt-MYB40_col_a	42	MYB	AT5G14340	MYB40		432	MYB_tnt-MYB92_100ng20cy_b	117	MYB	AT5G10280	MYB92
433	HSF_tnt-HSFB4_col_a	42	HSF	AT1G46264	HSFB4		433	AP2EREBP_tnt-ERF73_col_a	116	AP2-EREBP	AT1G72360	ERF73
434	G2like_tnt-KAN2_col_a	42	G2-like	AT1G32240	KAN2		434	Trihelix_tnt-AT2G33550_col_a	113	Trihelix	AT2G33550	AT2G33550
435	ABI3VP1_tnt-AT5G25475_col_a	41	ABI3-VP1	AT5G25475	AT5G25475		435	ND_tnt-ASHR1_col_a	113	ND	AT2G17900	ASHR1
436	bHLH_tnt-bHLH130_col_a	40	bHLH	AT2G42280	bHLH130		436	HSF_tnt-HSFB4_col_a	112	HSF	AT1G46264	HSFB4
437	NAC_tnt-ANAC011_col_a	40	NAC	AT1G32510	ANAC011		437	G2like_tnt-At3g12730_col_a	112	G2-like	AT3G12730	At3g12730
438	LOBAS2_tnt-LBD13_col_a	40	LOBAS2	AT2G30340	LBD13		438	bHLH_tnt-bHLH130_col_a	111	bHLH	AT2G42280	bHLH130
439	C2C2gata_tnt-GATA6_col200_a	40	C2C2-GATA	AT3G51080	GATA6		439	MYB_tnt-MYB116_col_a	108	MYB	AT1G25340	MYB116
440	ARID_tnt-At1g76110_col_a	40	ARID	AT1G76110	At1g76110		440	C2C2gata_tnt-GATA6_col200_a	108	C2C2-GATA	AT3G51080	GATA6
441	AP2EREBP_tnt-PUCHI_col_a	40	AP2-EREBP	AT5G18560	PUCHI		441	C2H2_tnt-AT3G46070_col_a	107	C2H2	AT3G46070	AT3G46070
442	LOBAS2_tnt-ASL18_col_a	39	LOBAS2	AT2G42430	ASL18		442	bZIP_tnt-bZIP42_col_a	105	bZIP	AT3G30530	bZIP42
443	CPP_tnt-TSO1_col_a	39	CPP	AT3G22780	TSO1		443	bHLH_tnt-bHLH74_col_a	104	bHLH	AT1G10120	bHLH74
444	Homeobox_tnt-HAT1_col_a	38	Homeobox	AT4G17460	HAT1		444	bHLH_tnt-BIM3_col_a	103	bHLH	AT5G38860	BIM3
445	C2C2COlike_tnt-AT4G27900_col_a	38	C2C2-CO-like	AT4G27900	AT4G27900		445	Homeobox_tnt-HAT1_col_a	101	Homeobox	AT4G17460	HAT1
446	ARID_tnt-At3g13350_col_a	38	ARID	AT3G13350	At3g13350		446	Homeobox_tnt-ATHB20_col_a	100	Homeobox	AT3G01220	ATHB20
447	AP2EREBP_tnt-LEP_col_a	38	AP2-EREBP	AT5G13910	LEP		447	MYB_tnt-MYB23_col_a	98	MYB	AT5G40330	MYB23
448	Trihelix_tnt-AT2G33550_col_a	37	Trihelix	AT2G33550	AT2G33550		448	HB_tnt-WOX11_col_a	97	HB	AT3G03660	WOX11
449	C3H_tnt-EMB1789_col_a	37	C3H	AT5G56930	EMB1789		449	MYB_tnt-MYB118_col_a	96	MYB	AT3G27785	MYB118
450	CCAATHAP3_tnt-HAP3_col_a	36	CCAAT-HAP3	AT2G38880	HAP3		450	AP2EREBP_tnt-LEP_col_a	96	AP2-EREBP	AT5G13910	LEP
451	SBP_tnt-SPL3_col_a	35	SBP	AT2G33810	SPL3		451	C2H2_tnt-At2g41835_col_b	94	C2H2	AT2G41835	At2g41835
452	MYB_tnt-MYB92_100ng20cy_b	35	MYB	AT5G10280	MYB92		452	LOBAS2_tnt-ASL18_col_a	89	LOBAS2	AT2G42430	ASL18
453	C2C2dof_tnt-dof43_col_a	35	C2C2-DOF	AT4G21040	DOF4-3		453	AP2EREBP_tnt-ERF48_col_a	84	AP2-EREBP	AT2G40340	ERF48
454	ABI3VP1_tnt-AT5G18090_col_a	32	ABI3-VP1	AT5G18090	AT5G18090		454	NAC_tnt-ANAC011_col_a	81	NAC	AT1G32510	ANAC011
455	Homeobox_tnt-ATHB20_col_a	31	Homeobox	AT3G01220	ATHB20		455	LOBAS2_tnt-AS2_col_a	79	LOBAS2	AT1G65620	AS2
456	MYB_tnt-MYB116_col_a	29	MYB	AT1G25340	MYB116		456	AP2EREBP_tnt-SHN3_col_a	79	AP2-EREBP	AT5G11190	SHN3
457	C2C2gata_tnt-ZML1_col_a	29	C2C2-GATA	AT3G21175	ZML1		457	EIL_tnt-EIL3_col_b	78	EIL	AT1G73730	EIL3
458	AP2EREBP_tnt-At5g67000_col_a	29	AP2-EREBP	AT5G67000	At5g67000		458	TCP_tnt-TCP17_col_a	76	TCP	AT5G08070	TCP17
459	Homeobox_tnt-HAT22_col_a	28	Homeobox	AT4G37790	HAT22		459	C2C2dof_tnt-dof43_col_a	76	C2C2-DOF	AT4G21040	DOF4-3
460	WRKY_tnt-WRKY59_col_a	27	WRKY	AT2G21900	WRKY59		460	TCP_tnt-TCP14_col_b	75	TCP	AT3G47620	TCP14
461	C2C2gata_tnt-ZML2_col_a	27	C2C2-GATA	AT1G51600	ZML2		461	G2like_tnt-KAN2_col_a	72	G2-like	AT1G32240	KAN2
462	C2H2_tnt-IDD2_col_a	25	C2H2	AT3G50700	IDD2		462	LIM_tnt-WLIM2A_col_a	71	LIM	AT2G39900	WLIM2A
463	bHLH_tnt-bHLH18_col_a	24	bHLH	AT2G22750	bHLH18		463	AP2EREBP_tnt-At5g67000_col_a	70	AP2-EREBP	AT5G67000	At5g67000
464	TCP_tnt-TCP14_col_b	24	TCP	AT3G47620	TCP14		464	CPP_tnt-TSO1_col_a	69	CPP	AT3G22780	TSO1
465	HSF_tnt-HSFB3_col_a	24	HSF	AT2G41690	HSFB3		465	BBRBPC_tnt-BPC5_col_a	67	BBR/BPC	AT4G38910	BPC5
466	WRKY_tnt-WRKY17_col_a	23	WRKY	AT2G24570	WRKY17		466	NAC_tnt-AT3G12910_col_a	64	NAC	AT3G12910	AT3G12910
467	AP2EREBP_tnt-ERF48_col_a	23	AP2-EREBP	AT2G40340	ERF48		467	C2H2_tnt-AT3G49930_col_a	64	C2H2	AT3G49930	AT3G49930
468	REMB3_tnt-AT2G31460_col_a	22	REM(B3)	AT2G31460	AT2G31460		468	Trihelix_tnt-AT5G47660_col_a	63	Trihelix	AT5G47660	AT5G47660
469	NAC_tnt-AT3G12910_col_a	22	NAC	AT3G12910	AT3G12910		469	HSF_tnt-HSFB3_col_a	62	HSF	AT2G41690	HSFB3
470	MYBrelated_tnt-AT1G18960_col_a	22	MYB-related	AT1G18960	AT1G18960		470	bHLH_tnt-bHLH18_col_a	61	bHLH	AT2G22750	bHLH18
471	LOBAS2_tnt-AS2_col_a	21	LOBAS2	AT1G65620	AS2		471	G2like_tnt-At3g13040_col_b	61	G2-like	AT3G13040	At3g13040
472	C2H2_tnt-STOP1_col_a	21	C2H2	AT1G34370	STOP1		472	AP2EREBP_tnt-CRF4_col_a	60	AP2-EREBP	AT4G27950	CRF4
473	ARID_tnt-AT1G04880_col_a	21	ARID	AT1G04880	AT1G04880		473	C2H2_tnt-STOP1_col_a	58	C2H2	AT1G34370	STOP1
474	TCP_tnt-TCP16_col_a	20	TCP	AT3G45150	TCP16		474	SBP_tnt-SPL3_col_a	56	SBP	AT2G33810	SPL3
475	C2H2_tnt-At2g41835_col_b	20	C2H2	AT2G41835	At2g41835		475	C2H2_tnt-IDD2_col_a	56	C2H2	AT3G50700	IDD2
476	G2like_tnt-At3g13040_col_b	18	G2-like	AT3G13040	At3g13040		476	C3H_tnt-EMB1789_col_a	55	C3H	AT5G56930	EMB1789
477	MYB_tnt-MYB105_col_a	17	MYB	AT1G69560	MYB105		477	WRKY_tnt-WRKY59_col_a	54	WRKY	AT2G21900	WRKY59
478	EIL_tnt-EIL3_col_b	17	EIL	AT1G73730	EIL3		478	Homeobox_tnt-HAT22_col_a	54	Homeobox	AT4G37790	HAT22
479	C3H_tnt-U2AF35B_col_a	17	C3H	AT5G42820	U2AF35B		479	C2C2COlike_tnt-AT4G27900_col_a	54	C2C2-CO-like	AT4G27900	AT4G27900
480	bZIP_tnt-bZIP69_col_a	16	bZIP	AT1G06070	bZIP69		480	CCAATHAP3_tnt-NFYB4_col_a	53	CCAAT-HAP3	AT1G09030	NFYB4
481	bHLH_tnt-bHLH104_col_b	16	bHLH	AT4G14410	bHLH104		481	REMB3_tnt-AT2G31460_col_a	47	REM(B3)	AT2G31460	AT2G31460
482	WRKY_tnt-WRKY26_col_a	16	WRKY	AT5G07100	WRKY26		482	GRF_tnt-GRF9_col_a	47	GRF	AT2G45480	GRF9
483	bZIP_tnt-bZIP43_col_a	15	bZIP	AT5G38800	bZIP43		483	MYB_tnt-MYB43_col_a	46	MYB	AT5G16600	MYB43
484	bHLH_tnt-PIF7_col_a	15	bHLH	AT5G61270	PIF7		484	C3H_tnt-U2AF35B_col_a	46	C3H	AT5G42820	U2AF35B
485	LIM_tnt-WLIM2A_col_a	15	LIM	AT2G39900	WLIM2A		485	C3H_tnt-TZF9_col_a	45	C3H	AT5G58620	TZF9
486	FHA_tnt-FHA2_col_b	15	FHA	AT3G07220	FHA2		486	ARID_tnt-AT1G04880_col_a	44	ARID	AT1G04880	AT1G04880
487	E2FDP_tnt-E2FC_col_a	15	E2F-DP	AT1G47870	E2FC		487	MYB_tnt-MYB105_col_a	40	MYB	AT1G69560	MYB105
488	C2H2_tnt-AT3G49930_col_a	15	C2H2	AT3G49930	AT3G49930		488	WRKY_tnt-WRKY17_col_a	39	WRKY	AT2G24570	WRKY17
489	C2C2gata_tnt-GATA19_col_a	14	C2C2-GATA	AT4G36620	GATA19		489	C2C2gata_tnt-GATA16_col_a	39	C2C2-GATA	AT5G49300	GATA16
490	AP2EREBP_tnt-CRF4_col_a	14	AP2-EREBP	AT4G27950	CRF4		490	bZIP_tnt-bZIP69_col_a	38	bZIP	AT1G06070	bZIP69
491	CCAATHAP3_tnt-NFYB4_col_a	13	CCAAT-HAP3	AT1G09030	NFYB4		491	bHLH_tnt-bHLH104_col_b	38	bHLH	AT4G14410	bHLH104
492	BBRBPC_tnt-BPC5_col_a	13	BBR/BPC	AT4G38910	BPC5		492	TCP_tnt-TCP16_col_a	38	TCP	AT3G45150	TCP16
493	TCP_tnt-TCP1_col_a	12	TCP	AT1G67260	TCP1		493	TCP_tnt-TCP1_col_a	37	TCP	AT1G67260	TCP1
494	MADS_tnt-AGL42_col_a	12	MADS	AT5G62165	AGL42		494	bHLH_tnt-bHLH64_col_a	36	bHLH	AT2G18300	bHLH64
495	C3H_tnt-TZF9_col_a	12	C3H	AT5G58620	TZF9		495	MADS_tnt-FEM111_col_a	36	MADS	AT5G48670	FEM111
496	WRKY_tnt-WRKY47_col_a	11	WRKY	AT4G01720	WRKY47		496	FHA_tnt-FHA2_col_b	34	FHA	AT3G07220	FHA2
497	bHLH_tnt-bHLH64_col_a	9	bHLH	AT2G18300	bHLH64		497	AP2EREBP_tnt-PLT1_col_a	33	AP2-EREBP	AT3G20840	PLT1
498	MYB_tnt-MYB1_col_a	9	MYB	AT3G09230	MYB1		498	WRKY_tnt-WRKY26_col_a	32	WRKY	AT5G07100	WRKY26
499	C2C2gata_tnt-GATA20_col_a	9	C2C2-GATA	AT2G18380	GATA20		499	MYBrelated_tnt-AT3G10580_col_a	32	MYB-related	AT3G10580	AT3G10580
500	bHLH_tnt-bHLH77_col_a	8	bHLH	AT3G23690	bHLH77		500	MYB_tnt-MYB52_col_a	32	MYB	AT1G17950	MYB52
501	Trihelix_tnt-AT3G25990_col_a	8	Trihelix	AT3G25990	AT3G25990		501	WRKY_tnt-WRKY47_col_a	31	WRKY	AT4G01720	WRKY47
502	ND_tnt-AT1G63040_col_a	8	ND	AT1G63040	AT1G63040		502	C2C2gata_tnt-GATA19_col_a	31	C2C2-GATA	AT4G36620	GATA19
503	MYB_tnt-MYB43_col_a	8	MYB	AT5G16600	MYB43		503	ND_tnt-AT1G63040_col_a	30	ND	AT1G63040	AT1G63040
504	MADS_tnt-AGL55_col_a	8	MADS	AT1G60920	AGL55		504	bHLH_tnt-bHLH77_col_a	29	bHLH	AT3G23690	bHLH77
505	Homeobox_tnt-WUS1_col_a	8	Homeobox	AT2G17950	WUS1		505	MADS_tnt-AGL55_col_a	29	MADS	AT1G60920	AGL55
506	C2H2_tnt-At2g48100_col_b	8	C2H2	AT2G48100	At2g48100		506	bHLH_tnt-bHLH69_col_a	23	bHLH	AT4G30980	bHLH69
507	C2C2gata_tnt-GATA16_col_a	8	C2C2-GATA	AT5G49300	GATA16		507	bHLH_tnt-PIF7_col_a	23	bHLH	AT5G61270	PIF7
508	AP2EREBP_tnt-SHN3_col_a	8	AP2-EREBP	AT5G11190	SHN3		508	MYB_tnt-MYB1_col_a	23	MYB	AT3G09230	MYB1
509	BBRBPC_tnt-BPC6_col_a	7	BBR/BPC	AT5G42520	BPC6		509	G2like_tnt-AT2G20400_col_a	23	G2-like	AT2G20400	AT2G20400
510	AP2EREBP_tnt-PLT1_col_a	7	AP2-EREBP	AT3G20840	PLT1		510	E2FDP_tnt-E2FC_col_a	23	E2F-DP	AT1G47870	E2FC
511	G2like_tnt-AT2G20400_col_a	6	G2-like	AT2G20400	AT2G20400		511	C2C2gata_tnt-GATA20_col_a	23	C2C2-GATA	AT2G18380	GATA20
512	MYB_tnt-MYB52_col_a	2	MYB	AT1G17950	MYB52		512	bZIP_tnt-bZIP43_col_a	15	bZIP	AT5G38800	bZIP43
513	bHLH_tnt-bHLH69_col_a	1	bHLH	AT4G30980	bHLH69		513	MYBrelated_tnt-At2g38090_col_a	15	MYB-related	AT2G38090	At2g38090
								Homeobox_tnt-WUS1_col_a	15	Homeobox	AT2G17950	WUS1
								C2H2_tnt-At2g48100_col_b	15	C2H2	AT2G48100	At2g48100
								Trihelix_tnt-AT3G25990_col_a	14	Trihelix	AT3G25990	AT3G25990
								C3H_tnt-At1g70910_col_a	14	C3H	AT1G70910	At1g70910
								C3H_tnt-At1g74370_col_a	13	C3H	AT1G74370	At1g74370
								GeBP_tnt-AT1G66420_col_a	7	GeBP	AT1G66420	AT1G66420
								BBRBPC_tnt-BPC6_col_a	7	BBR/BPC	AT5G42520	BPC6

## Sheet: Table S5
Supplementary Table 5. Summary of the groups of TF families with binding peaks in PE regions
The entire list of groups of TF families with binding peaks in PE regions based on DAP-seq data (for Fig. 2e-g). The names of TF families and the number of binding sites are shown. There are two separate panels: (i) The list of TF family members with binding peaks located at midpoint-proximal regions of PEs; (ii) The list of TF family members with binding peaks located within the entire 3-kb PE r…
(i) The list of TF family members with binding peaks located at midpoint-proximal regions of PEs				(ii) The list of TF family members with binding peaks located within the entire 3-kb PE regions
Rank	TF family	Number of binding sites at midpoint-proximal regions of PEs		Rank	TF family	Number of binding sites at entire 3-kb PE regions
1	NAC	64581		1	NAC	160931
2	C2C2-DOF	54554		2	C2C2-DOF	119443
3	WRKY	49055		3	MYB	109502
4	MYB	43939		4	WRKY	105203
5	AP2-EREBP	33758		5	AP2-EREBP	88982
6	MYB-related	29821		6	MYB-related	78462
7	G2-like	21471		7	G2-like	62360
8	bZIP	20653		8	bZIP	45943
9	C2H2	17828		9	C2H2	45273
10	HB	15927		10	HB	38078
11	ZF-HD	13844		11	ZF-HD	31292
12	Homeobox	9551		12	Homeobox	24202
13	bHLH	7863		13	HSF	21379
14	ARF	7367		14	bHLH	20707
15	HSF	7200		15	ARF	18268
16	Trihelix	6284		16	SBP	14809
17	SBP	5229		17	Trihelix	13970
18	MADS	5112		18	LOBAS2	13033
19	ABI3-VP1	4811		19	MADS	12629
20	LOBAS2	4656		20	ABI3-VP1	11790
21	Orphan	3530		21	Orphan	7738
22	REM	2788		22	C3H	6394
23	TCP	2693		23	TCP	5990
24	C3H	2578		24	REM	5620
25	CPP	2558		25	RAV	5415
26	BZR	2239		26	CPP	5386
27	RAV	1949		27	C2C2-GATA	5337
28	C2C2-GATA	1807		28	BZR	5089
29	GeBP	1411		29	GeBP	4675
30	ARID	1383		30	GRF	4014
31	S1Fa-like	1342		31	S1Fa-like	3824
32	C2C2-YABBY	1224		32	C2C2-YABBY	3440
33	GRF	1095		33	ARID	3224
34	ND	1003		34	ND	2589
35	E2F-DP	859		35	mTERF	1767
36	CAMTA	765		36	E2F-DP	1585
37	mTERF	647		37	CAMTA	1540
38	BES1	463		38	BES1	954
39	zf-GRF	454		39	zf-GRF	935
40	FAR1	349		40	RWP-RK	889
41	RWP-RK	330		41	PLATZ	809
42	PLATZ	278		42	EIL	668
43	EIL	217		43	FAR1	597
44	BBR/BPC	183		44	BBR/BPC	434
45	HMG	146		45	HMG	419
46	C2C2-CO-like	125		46	DBP	295
47	DBP	76		47	NLP	239
48	BSD	63		48	CCAAT-HAP3	186
49	NLP	55		49	C2C2-CO-like	174
50	CCAAT-HAP3	49		50	SRS	170
51	SRS	46		51	BSD	147
52	REM(B3)	22		52	LIM	71
53	LIM	15		53	REM(B3)	47
54	FHA	15		54	FHA	34

## Sheet: Table S6
Supplementary Table 6. The total number of PE midpoint-proximal regions bound by individual TFs.
The five specific TFs (represented by the red bar on Fig. 2f) contribute to binding at over 600 PEs (30–40% of total PEs) are highlighted in blue. The TF names as described in DAP-seq experiment, number of PE midpoint-proximal regions bound, and the percentage of total 1919 PEs are shown from left to right. The list of TFs was ranked from high to low based on the numbers of PE midpoint-proximal r…
TF names in DAP-seq	Number of PE midpoint-proximal regions bound	Percentage of total PEs
ARF_ecoli-MP_col	697	0.36321
C2C2dof_tnt-AT5G02460_col_a	661	0.34445
C2C2dof_tnt-At5g62940_col_a	618	0.322043
G2like_tnt-At3g24120_col_a	617	0.321522
MYB_tnt-MYB77_col_a	614	0.319958
HSF_tnt-HSFA6B_col	570	0.29703
WRKY_tnt-WRKY22_col	567	0.295466
WRKY_tnt-WRKY15_col_b	558	0.290776
WRKY_tnt-WRKY8_col	549	0.286087
C2C2dof_tnt-dof45_col_a	537	0.279833
C2C2dof_tnt-AT2G28810_col_a	528	0.275143
C2C2dof_tnt-OBP1_col_a	521	0.271496
MYB_tnt-MYB33_col_a	520	0.270974
WRKY_tnt-WRKY75_col_a	510	0.265763
C2C2dof_tnt-AT5G66940_col_a	495	0.257947
NAC_tnt-SND3_col_b	492	0.256384
MYBrelated_tnt-EPR1_col	492	0.256384
HB_tnt-ATHB40_col_a	480	0.25013
C2H2_tnt-STZ_col	473	0.246483
MYB_tnt-MYB67_col_a	467	0.243356
MYB_tnt-ATY13_col_a	461	0.240229
ZFHD_tnt-ATHB23_col_b	458	0.238666
WRKY_tnt-WRKY18_col_a	448	0.233455
MYBrelated_tnt-AT3G10113_col_a	440	0.229286
C2C2dof_tnt-dof24_col_a	438	0.228244
HB_tnt-ATHB5_col_a	425	0.22147
MYBrelated_tnt-RVE1_col_a	421	0.219385
Homeobox_tnt-ATHB13_col_a	412	0.214695
AP2EREBP_tnt-CEJ1_col_a	405	0.211047
SBP_tnt-SPL9_col_a	403	0.210005
ABI3VP1_tnt-AT5G60130_col_a	397	0.206879
ZFHD_tnt-ATHB25_col_a	391	0.203752
WRKY_tnt-WRKY50_col_a	385	0.200625
MYB_tnt-MYB44_col	384	0.200104
C2C2dof_tnt-At3g45610_col_a	384	0.200104
Orphan_tnt-BBX31_col_a	381	0.198541
NAC_tnt-SMB_col_a	378	0.196978
NAC_tnt-ANAC071_col_a	376	0.195935
WRKY_tnt-WRKY28_col_a	375	0.195414
REM_tnt-REM19_col_a	364	0.189682
C2C2dof_tnt-OBP3_col_a	364	0.189682
HB_tnt-LMI1_col_a	363	0.189161
ZFHD_tnt-AtHB32_col200_a	358	0.186555
ZFHD_tnt-ATHB33_col_a	357	0.186034
NAC_tnt-ANAC016_col_a	354	0.184471
G2like_tnt-At3g04030_col_a	353	0.18395
C2C2dof_tnt-DAG2_col_a	351	0.182908
LOBAS2_tnt-LBD2_col_a	342	0.178218
MYBrelated_tnt-At1g49010_col_a	340	0.177176
C2H2_tnt-IDD4_col_a	338	0.176133
C3H_tnt-AT5G63260_col_a	336	0.175091
NAC_tnt-ANAC058_col_a	335	0.17457
G2like_tnt-AT5G45580_col_a	330	0.171965
MADS_tnt-AGL63_col_a	325	0.169359
bHLH_tnt-BIM2_col_v3b	323	0.168317
C2C2dof_tnt-OBP4_col_a	323	0.168317
AP2EREBP_tnt-At4g16750_col_a	322	0.167796
bZIP_tnt-TGA6_col_a	321	0.167275
MYBrelated_tnt-LHY1_col_a	305	0.158937
MYBrelated_tnt-At5g47390_col_b	305	0.158937
WRKY_tnt-WRKY45_col_a	299	0.15581
C2C2dof_tnt-At1g64620_100ng20cy_b	299	0.15581
NAC_tnt-ANAC045_col_a	293	0.152684
NAC_tnt-VND6_col_v31	290	0.15112
NAC_tnt-ANAC083_col_v3a	290	0.15112
MYB_tnt-MYB70_col_a	289	0.150599
G2like_tnt-AT4G37180_col_a	283	0.147473
WRKY_tnt-WRKY71_col_a	280	0.145909
C2C2dof_tnt-Adof1_col_a	280	0.145909
ARF_tnt-ARF2_col_v31	280	0.145909
RAV_tnt-RAV1_col	277	0.144346
WRKY_tnt-WRKY65_col_a	275	0.143304
NAC_tnt-VND2_col_a	273	0.142262
NAC_tnt-ANAC096_col	272	0.14174
MYB_tnt-MYB57_col_a	270	0.140698
C2H2_tnt-AT4G26030_col_a	270	0.140698
G2like_tnt-At2g03500_col_a	267	0.139135
C2C2dof_tnt-COG1_col_a	266	0.138614
NAC_tnt-NST1_col_v31	262	0.136529
NAC_tnt-ANAC070_col	261	0.136008
bHLH_tnt-bHLH122_col100_a	260	0.135487
NAC_tnt-VND4_col	259	0.134966
AP2EREBP_tnt-CBF4_col_a	257	0.133924
WRKY_tnt-WRKY55_col_a	256	0.133403
AP2EREBP_tnt-AT1G71450_col_a	252	0.131318
WRKY_tnt-WRKY70_col	250	0.130276
MADS_tnt-SVP_col_v3b	250	0.130276
AP2EREBP_tnt-ERF7_col_a	247	0.128713
NAC_tnt-NTM1_col_a	246	0.128192
MYB_tnt-MYB3R1_col_a	245	0.127671
NAC_tnt-NAC2_col_v3a	243	0.126628
WRKY_tnt-WRKY40_col	242	0.126107
NAC_tnt-ANAC050_col_v3a	242	0.126107
bZIP_tnt-GBF6_col	236	0.122981
MYB_tnt-MYB73_col_a	235	0.12246
C2H2_tnt-At3g60580_col_a	233	0.121417
NAC_tnt-ATAF1_col_a	231	0.120375
Trihelix_tnt-GTL1_col_a	230	0.119854
Homeobox_tnt-ATHB7_col_a	229	0.119333
C2H2_tnt-At5g04390_col200_a	223	0.116206
WRKY_tnt-WRKY24_col_a	221	0.115164
G2like_tnt-At1g25550_col	218	0.113601
MYBrelated_tnt-At1g19000_col_a	216	0.112559
GeBP_tnt-AT4G00250_col_a	216	0.112559
HB_tnt-PHV_col_a	214	0.111516
NAC_tnt-ANAC028_col_a	208	0.10839
NAC_tnt-ANAC047_col	207	0.107869
G2like_tnt-At2g01060_col	206	0.107348
NAC_tnt-ANAC055_col	202	0.105263
MYBrelated_tnt-At3g09600_col_a	202	0.105263
MYB_tnt-MYB88_col_a	201	0.104742
MYB_tnt-MYB107_col_a	201	0.104742
HB_tnt-ATHB53_col_a	201	0.104742
Trihelix_tnt-AT5G05550_col_a	198	0.103179
bZIP_tnt-bZIP68_col_a	197	0.102658
S1Falike_tnt-AT3G09735_col_a	197	0.102658
MYB_tnt-MS188_col_a	196	0.102137
bHLH_tnt-bHLH28_col_a	195	0.101615
NAC_tnt-ANAC020_col_v31	194	0.101094
G2like_tnt-At1g68670_col	193	0.100573
WRKY_tnt-WRKY25_col_a	192	0.100052
Trihelix_tnt-GT2_col_a	192	0.100052
Homeobox_tnt-HDG1_col100_a	190	0.0990099
HSF_tnt-HSF3_col_a	190	0.0990099
Homeobox_tnt-ATHB6_col_a	187	0.0974466
NAC_tnt-VND1_col_a	186	0.0969255
G2like_tnt-AT1G49560_col_a	186	0.0969255
Homeobox_ecoli-HAT2_col_v31	184	0.0958833
C2C2dof_tnt-AT1G69570_col_a	184	0.0958833
LOBAS2_tnt-LBD19_col_a	180	0.0937989
bZIP_tnt-bZIP3_col_a	179	0.0932777
bZIP_tnt-bZIP53_col	178	0.0927566
C2C2dof_tnt-CDF3_col_a	178	0.0927566
C2C2YABBY_tnt-CRC_col_a	178	0.0927566
WRKY_tnt-WRKY33_col_a	177	0.0922355
AP2EREBP_tnt-ERF15_col	174	0.0906722
MYBrelated_tnt-TBP3_col_a	165	0.0859823
bHLH_tnt-bHLH80_col_a	164	0.0854612
NAC_tnt-CUC3_col_a	162	0.084419
C2C2dof_tnt-At4g38000_col_a	159	0.0828557
GRF_tnt-AtGRF6_col_a	157	0.0818134
NAC_tnt-ANAC005_col_a	156	0.0812923
MYB_tnt-MYB49_col_a	156	0.0812923
AP2EREBP_tnt-Rap210_col_a	156	0.0812923
HB_tnt-ATHB15_col_a	154	0.0802501
C2H2_tnt-IDD7_col_a	153	0.079729
AP2EREBP_tnt-AT1G12630_col_a	153	0.079729
MYBrelated_tnt-At4g01280_col_a	151	0.0786868
MYBrelated_tnt-At1g74840_col100_a	150	0.0781657
NAC_tnt-ANAC038_col_a	148	0.0771235
ARID_tnt-AT1G20910_col_a	147	0.0766024
bZIP_tnt-GBF3_col	146	0.0760813
WRKY_tnt-WRKY14_col_a	145	0.0755602
MYB_tnt-MYB119_col_a	144	0.0750391
AP2EREBP_tnt-At1g19210_col_a	144	0.0750391
MYBrelated_tnt-AT5G56840_col_a	142	0.0739969
ABI3VP1_tnt-VRN1_col_a	142	0.0739969
NAC_tnt-ANAC004_col_a	141	0.0734758
NAC_tnt-ANAC046_col	140	0.0729547
HB_tnt-ATHB21_col_a	140	0.0729547
BZR_tnt-At4g36780_col_a	140	0.0729547
MYB_tnt-MYB58_col_a	139	0.0724336
AP2EREBP_tnt-CBF1_col_a	139	0.0724336
NAC_tnt-ANAC034_col	138	0.0719125
NAC_tnt-NTL8_col	137	0.0713913
NAC_tnt-ANAC053_col	136	0.0708702
AP2EREBP_tnt-AT1G77200_col_a	136	0.0708702
NAC_tnt-ANAC013_col_a	135	0.0703491
HB_tnt-ANL2_col_a	135	0.0703491
bZIP_tnt-bZIP52_col_v31	132	0.0687858
NAC_tnt-ANAC103_col_a	131	0.0682647
NAC_tnt-NAM_col_v3a	130	0.0677436
CPP_tnt-SOL1_col	130	0.0677436
SBP_tnt-SPL5_col_a	129	0.0672225
MYB_tnt-MYB98_col_a	129	0.0672225
C2C2dof_tnt-AT3G52440_col_a	129	0.0672225
ZFHD_tnt-ATHB34_col_a	128	0.0667014
NAC_tnt-ANAC042_col_a	124	0.064617
BZR_tnt-At1g78700_col_a	124	0.064617
Trihelix_tnt-At3g14180_col	123	0.0640959
AP2EREBP_tnt-RAP212_col_a	123	0.0640959
MYBrelated_tnt-AT5G61620_col_a	122	0.0635748
NAC_tnt-NTM2_col_b	121	0.0630537
NAC_tnt-ANAC075_col_a	121	0.0630537
NAC_tnt-ANAC057_col_a	120	0.0625326
CPP_tnt-TCX2_col_a	120	0.0625326
C2H2_tnt-AT5G22990_col_a	119	0.0620115
AP2EREBP_tnt-ERF38_col_a	119	0.0620115
bZIP_tnt-AREB3_col_v31	118	0.0614904
G2like_tnt-AT2G40260_col_a	117	0.0609693
bZIP_tnt-ABI5_col_v3h	116	0.0604482
AP2EREBP_tnt-ERF8_col_a	114	0.0594059
bZIP_tnt-TGA1_col	112	0.0583637
AP2EREBP_tnt-ERF11_col_b	112	0.0583637
AP2EREBP_tnt-CBF3_col_a	112	0.0583637
bZIP_tnt-TGA9_col_a	111	0.0578426
MYB_tnt-MYB3R5_col_a	109	0.0568004
HSF_tnt-HSFC1_col_a	109	0.0568004
NAC_tnt-ANAC062_col	104	0.0541949
LOBAS2_tnt-LBD18_col_a	103	0.0536738
bZIP_tnt-TGA4_col_a	101	0.0526316
NAC_tnt-NAP_col_v3a	101	0.0526316
bZIP_tnt-bZIP50_col_v31	100	0.0521105
WRKY_tnt-WRKY29_col_a	98	0.0510683
AP2EREBP_tnt-At4g32800_col	97	0.0505472
CPP_tnt-AT2G20110_col_a	96	0.0500261
NAC_tnt-CUC2_col	95	0.049505
MYBrelated_tnt-LCL1_col	95	0.049505
bZIP_tnt-bZIP18_col_v31	92	0.0479416
bZIP_tnt-TGA3_col	92	0.0479416
MYB_tnt-MYB93_col_a	91	0.0474205
MYB_tnt-MYB81_col_a	91	0.0474205
MYB_tnt-MYB65_col200_a	91	0.0474205
C2H2_tnt-JKD_col_a	91	0.0474205
NAC_tnt-ANAC017_col	90	0.0468994
mTERF_tnt-AT5G23930_col_a	88	0.0458572
G2like_tnt-At5g29000_col_a	88	0.0458572
AP2EREBP_tnt-ERF4_col_a	88	0.0458572
AP2EREBP_tnt-DREB19_col_a	88	0.0458572
NAC_tnt-VND3_col	87	0.0453361
ZFHD_tnt-ATHB24_col_a	85	0.0442939
MYBrelated_tnt-At5g08520_col_b	85	0.0442939
AP2EREBP_tnt-At2g33710_col	85	0.0442939
TCP_tnt-At5g08330_col_a	84	0.0437728
MYB_tnt-MYB3R4_col_a	84	0.0437728
AP2EREBP_tnt-RRTF1_col_a	84	0.0437728
C2H2_tnt-WIP5_col_a	83	0.0432517
WRKY_tnt-WRKY27_col_a	82	0.0427306
SBP_tnt-SPL1_col_a	82	0.0427306
CAMTA_tnt-CAMTA1_col_a	81	0.0422095
C2H2_tnt-At5g66730_col	80	0.0416884
TCP_tnt-TCP24_col	79	0.0411673
NAC_tnt-ANAC092_col_v3a	79	0.0411673
ND_tnt-FRS9_col_a	78	0.0406462
NAC_tnt-ANAC079_col	77	0.0401251
MYB_tnt-MYB63_col_a	77	0.0401251
MYB_tnt-MYB61_col_a	77	0.0401251
AP2EREBP_tnt-CRF10_col100_a	77	0.0401251
NAC_tnt-CUC1_col_v31	76	0.039604
C2H2_tnt-AT2G15740_col_a	76	0.039604
bZIP_tnt-TGA5_col_v3a	75	0.0390829
bZIP_tnt-TGA2_col	75	0.0390829
MYBrelated_tnt-AT1G72740_col_a	75	0.0390829
AP2EREBP_tnt-ERF10_col_a	75	0.0390829
MYB_tnt-MYB13_col_a	73	0.0380406
WRKY_tnt-WRKY20_col_a	72	0.0375195
Orphan_tnt-AT1G24250_col_a	71	0.0369984
MYBrelated_tnt-At5g52660_col_a	71	0.0369984
C2H2_tnt-SGR5_col_a	71	0.0369984
bZIP_tnt-GBF5_col_v3a	70	0.0364773
AP2EREBP_tnt-At4g31060_col_a	70	0.0364773
AP2EREBP_tnt-ESE3_col_a	68	0.0354351
MYB_tnt-MYB27_col_a	67	0.034914
C2C2gata_tnt-GATA15_col_b	67	0.034914
C2C2gata_tnt-GATA11_col_a	67	0.034914
bZIP_tnt-bZIP44_col	66	0.0343929
zfGRF_tnt-AT3G42860_col_a	64	0.0333507
AP2EREBP_tnt-DEAR2_col_a	63	0.0328296
AP2EREBP_tnt-CBF2_col_a	62	0.0323085
TCP_tnt-At1g72010_col	60	0.0312663
bZIP_tnt-ABF2_col_v3a	59	0.0307452
SBP_tnt-SPL14_col_a	59	0.0307452
NAC_tnt-ANAC087_col_v3a	59	0.0307452
Homeobox_tnt-PDF2_col	59	0.0307452
AP2EREBP_tnt-At1g22810_col	59	0.0307452
MYB_tnt-MYB121_col_a	58	0.0302241
AP2EREBP_tnt-DEAR3_col_a	58	0.0302241
WRKY_tnt-WRKY7_col	57	0.029703
MYBrelated_tnt-At5g05790_col_a	56	0.0291819
BES1_tnt-BAM8_col_a	56	0.0291819
MADS_tnt-AGL15_col_a	55	0.0286608
WRKY_tnt-WRKY21_col	54	0.0281397
bZIP_tnt-bZIP16_col_v3a	53	0.0276186
AP2EREBP_tnt-ERF105_col	53	0.0276186
bHLH_tnt-bHLH31_col	51	0.0265763
E2FDP_tnt-E2FA_col_a	51	0.0265763
E2FDP_tnt-DEL2_col_a	51	0.0265763
C2C2gata_tnt-GATA12_col_a	51	0.0265763
AP2EREBP_tnt-RAP211_col_a	51	0.0265763
C2H2_tnt-MGP_col_a	49	0.0255341
C2H2_tnt-JGL_col_a	49	0.0255341
C2H2_tnt-AtIDD11_col_a	48	0.025013
AP2EREBP_tnt-ERF3_col_a	48	0.025013
AP2EREBP_tnt-DDF1_col_a	48	0.025013
bZIP_tnt-bZIP28_col_a	47	0.0244919
TCP_tnt-TCP3_col	47	0.0244919
MYB_tnt-BOS1_col_a	46	0.0239708
ABI3VP1_tnt-NGA4_col_a	44	0.0229286
WRKY_tnt-WRKY3_col_a	42	0.0218864
PLATZ_tnt-AT2G01818_col_a	41	0.0213653
AP2EREBP_tnt-DEAR5_col_a	40	0.0208442
AP2EREBP_tnt-ABR1_col_a	40	0.0208442
MYB_tnt-MYB56_col_a	38	0.019802
MYB_tnt-MYB96_col_b	37	0.0192809
FAR1_tnt-FAR1_col_a	37	0.0192809
ND_tnt-AT2G28920_col_a	36	0.0187598
MYB_tnt-MYB30_col_a	36	0.0187598
Homeobox_tnt-ATHB18_col_a	36	0.0187598
AP2EREBP_tnt-RAP26_col_a	36	0.0187598
WRKY_tnt-WRKY11_col_a	35	0.0182387
MYB_tnt-MYB99_col_a	35	0.0182387
MYB_tnt-MYB10_col_a	34	0.0177176
AP2EREBP_tnt-DREB2_col_a	34	0.0177176
AP2EREBP_tnt-ERF115_col_a	33	0.0171965
AP2EREBP_tnt-At5g18450_col_a	33	0.0171965
Trihelix_tnt-GT3a_col_a	32	0.0166754
TCP_tnt-At1g69690_col_a	32	0.0166754
C2H2_tnt-NUC_col_a	32	0.0166754
AP2EREBP_tnt-RAP21_col_a	32	0.0166754
AP2EREBP_tnt-TINY_col_a	31	0.0161542
TCP_tnt-TCP7_col_a	29	0.015112
RWPRK_tnt-RKD2_col_a	29	0.015112
HSF_tnt-HSF6_col_a	29	0.015112
ABI3VP1_tnt-FUS3_col_a	29	0.015112
TCP_tnt-TCP20_col_a	28	0.0145909
MYB_tnt-MYB94_col_b	28	0.0145909
MADS_tnt-AGL6_col_a	28	0.0145909
AP2EREBP_tnt-At5g65130_col_a	28	0.0145909
bZIP_tnt-VIP1_col_v3a	27	0.0140698
MYB_tnt-MYB39_col_a	27	0.0140698
HSF_tnt-HSF7_col_a	27	0.0140698
AP2EREBP_tnt-ERF13_col_b	27	0.0140698
WRKY_tnt-WRKY30_col_a	26	0.0135487
EIL_tnt-EIN3_col_a	26	0.0135487
bHLH_tnt-BIM1_col_a	25	0.0130276
SBP_tnt-SPL13_col_a	25	0.0130276
Homeobox_tnt-HAT5_col_a	25	0.0130276
C2C2dof_tnt-dof42_col_a	25	0.0130276
AP2EREBP_tnt-AT1G44830_col_a	25	0.0130276
NAC_tnt-AT1G19040_col_a	24	0.0125065
MYBrelated_tnt-At3g11280_col_a	24	0.0125065
LOBAS2_tnt-LBD23_col_a	24	0.0125065
HSF_tnt-HSFA6A_col_a	24	0.0125065
bHLH_tnt-bHLH10_col_a	23	0.0119854
C2C2gata_tnt-ZIM_col_a	23	0.0119854
WRKY_tnt-WRKY43_col_a	22	0.0114643
NAC_tnt-SND2_col_a	22	0.0114643
MADS_tnt-AGL16_col_a	22	0.0114643
HMG_tnt-3XHMGBOX1_col_a	22	0.0114643
C2C2gata_tnt-GATA1_col_a	22	0.0114643
BZR_tnt-BZR1_col_a	22	0.0114643
BZR_tnt-At4g18890_col_a	22	0.0114643
MYBrelated_tnt-TRP2_col_a	21	0.0109432
MYB_tnt-MYB113_col_a	21	0.0109432
C2H2_tnt-TF3A_col_a	21	0.0109432
C2C2gata_tnt-GATA4_col_a	21	0.0109432
RWPRK_tnt-NLP7_col_a	20	0.0104221
BBRBPC_tnt-BPC1_col_a	20	0.0104221
MYBrelated_tnt-TRP1_col	19	0.00990099
bZIP_tnt-bZIP48_col_a	18	0.00937989
bZIP_tnt-TGA10_col_a	18	0.00937989
Trihelix_tnt-AT1G76870_col_b	18	0.00937989
AP2EREBP_tnt-ERF104_col_a	18	0.00937989
MYBrelated_tnt-At5g58900_col_a	17	0.00885878
MYB_tnt-MYB4_col200_a	17	0.00885878
MYB_tnt-MYB101_col_a	17	0.00885878
G2like_tnt-At1g13300_col_a	17	0.00885878
AP2EREBP_tnt-ESE1_col_a	17	0.00885878
AP2EREBP_tnt-At2g44940_col_a	17	0.00885878
ND_tnt-AGL95_col_a	16	0.00833768
NAC_tnt-ANAC094_col_a	16	0.00833768
CAMTA_tnt-CAMTA5_col_a	16	0.00833768
AP2EREBP_tnt-AT3G60490_col_a	16	0.00833768
AP2EREBP_tnt-AIL7_col_a	16	0.00833768
bHLH_tnt-bHLH157_col_a	15	0.00781657
MYB_tnt-MYB51_col_a	15	0.00781657
HB_tnt-HDG7_col_a	15	0.00781657
AP2EREBP_tnt-ERF9_col_a	15	0.00781657
HSF_tnt-HSFA1E_col_a	14	0.00729547
G2like_tnt-AT2G38300_col_a	14	0.00729547
DBP_tnt-AT3G51470_col_a	14	0.00729547
C2C2dof_tnt-AT1G47655_col_a	14	0.00729547
AP2EREBP_tnt-ERF1_col_a	14	0.00729547
Trihelix_tnt-AT3G10030_col_a	13	0.00677436
C3H_tnt-At5g08750_col_a	13	0.00677436
AP2EREBP_tnt-AT1G28160_col_a	13	0.00677436
WRKY_tnt-WRKY42_col_a	12	0.00625326
MYB_tnt-MYB83_col_a	12	0.00625326
MYB_tnt-MYB41_col_a	12	0.00625326
MADS_tnt-AGL25_col_a	12	0.00625326
E2FDP_tnt-DEL1_col_a	12	0.00625326
C2C2COlike_tnt-AT5G59990_col_a	12	0.00625326
AP2EREBP_tnt-At1g36060_col_a	12	0.00625326
AP2EREBP_tnt-AT1G01250_col_a	12	0.00625326
bHLH_tnt-BIM3_col_a	11	0.00573215
Trihelix_tnt-AT1G76880_col_a	11	0.00573215
LOBAS2_tnt-LOB_col_a	11	0.00573215
HSF_tnt-HSF21_col_a	11	0.00573215
C2C2gata_tnt-GATA14_col_a	11	0.00573215
AP2EREBP_tnt-AT3G16280_col_a	11	0.00573215
WRKY_tnt-WRKY31_col_a	10	0.00521105
Trihelix_tnt-GT1_col_a	10	0.00521105
Trihelix_tnt-AT3G58630_col_a	10	0.00521105
G2like_tnt-At3g12730_col_a	10	0.00521105
C2H2_tnt-At1g14580_col_a	10	0.00521105
AP2EREBP_tnt-ERF5_col_a	10	0.00521105
WRKY_tnt-WRKY6_col_a	9	0.00468994
SBP_tnt-SPL15_col_a	9	0.00468994
MYB_tnt-MYB118_col_a	9	0.00468994
MADS_tnt-AGL13_col_b	9	0.00468994
ARID_tnt-AT2G17410_col_a	9	0.00468994
ARF_tnt-ARF16_col_b	9	0.00468994
AP2EREBP_tnt-PLT3_col_a	9	0.00468994
AP2EREBP_tnt-ERF73_col_a	9	0.00468994
AP2EREBP_tnt-ERF2_col_a	9	0.00468994
AP2EREBP_tnt-AT4G18450_col_a	9	0.00468994
bZIP_tnt-bZIP42_col_a	8	0.00416884
bHLH_tnt-bHLH74_col_a	8	0.00416884
NLP_tnt-AtNLP4_col_b	8	0.00416884
MYB_tnt-ATY19_col_a	8	0.00416884
C2H2_tnt-At5g22890_col_a	8	0.00416884
BSD_tnt-AT1G10720_col_a	8	0.00416884
ARID_tnt-At1g76110_col_a	8	0.00416884
AP2EREBP_tnt-DREB26_col_a	8	0.00416884
AP2EREBP_tnt-DDF2_col_a	8	0.00416884
AP2EREBP_tnt-At4g28140_col_a	8	0.00416884
AP2EREBP_tnt-At1g75490_col_a	8	0.00416884
bHLH_tnt-bHLH130_col_a	7	0.00364773
Trihelix_tnt-AT5G47660_col_a	7	0.00364773
TCP_tnt-At2g45680_col_b	7	0.00364773
SRS_tnt-SRS7_col_a	7	0.00364773
Orphan_tnt-AT1G23810_col_a	7	0.00364773
MYB_tnt-MYB92_100ng20cy_b	7	0.00364773
MYB_tnt-MYB62_col_a	7	0.00364773
LOBAS2_tnt-LBD13_col_a	7	0.00364773
HB_tnt-WOX11_col_a	7	0.00364773
CPP_tnt-TSO1_col_a	7	0.00364773
C2H2_tnt-AT3G46070_col_a	7	0.00364773
C2C2gata_tnt-GATA6_col200_a	7	0.00364773
ARID_tnt-At3g13350_col_a	7	0.00364773
AP2EREBP_tnt-PUCHI_col_a	7	0.00364773
AP2EREBP_tnt-ERF48_col_a	7	0.00364773
AP2EREBP_tnt-At1g77640_col_a	7	0.00364773
AP2EREBP_tnt-AT3G57600_col_a	7	0.00364773
ABI3VP1_tnt-REM16_col_a	7	0.00364773
ABI3VP1_tnt-AT5G25475_col_a	7	0.00364773
TCP_tnt-TCP17_col_a	6	0.00312663
TCP_tnt-PTF1_col_a	6	0.00312663
SBP_tnt-SPL11_col100_a	6	0.00312663
ND_tnt-ASHR1_col_a	6	0.00312663
MYB_tnt-MYB40_col_a	6	0.00312663
MYB_tnt-MYB23_col_a	6	0.00312663
LOBAS2_tnt-ASL18_col_a	6	0.00312663
HSF_tnt-HSFB4_col_a	6	0.00312663
G2like_tnt-KAN2_col_a	6	0.00312663
CCAATHAP3_tnt-HAP3_col_a	6	0.00312663
C2C2dof_tnt-dof43_col_a	6	0.00312663
ABI3VP1_tnt-AT5G18090_col_a	6	0.00312663
Trihelix_tnt-AT2G33550_col_a	5	0.00260552
SBP_tnt-SPL3_col_a	5	0.00260552
NAC_tnt-ANAC011_col_a	5	0.00260552
Homeobox_tnt-HAT22_col_a	5	0.00260552
Homeobox_tnt-HAT1_col_a	5	0.00260552
Homeobox_tnt-ATHB20_col_a	5	0.00260552
C3H_tnt-EMB1789_col_a	5	0.00260552
C2C2COlike_tnt-AT4G27900_col_a	5	0.00260552
AP2EREBP_tnt-LEP_col_a	5	0.00260552
AP2EREBP_tnt-At5g67000_col_a	5	0.00260552
bHLH_tnt-bHLH18_col_a	4	0.00208442
WRKY_tnt-WRKY59_col_a	4	0.00208442
MYBrelated_tnt-AT1G18960_col_a	4	0.00208442
MYB_tnt-MYB116_col_a	4	0.00208442
C2H2_tnt-IDD2_col_a	4	0.00208442
C2H2_tnt-At2g41835_col_b	4	0.00208442
C2C2gata_tnt-ZML2_col_a	4	0.00208442
C2C2gata_tnt-ZML1_col_a	4	0.00208442
ARID_tnt-AT1G04880_col_a	4	0.00208442
WRKY_tnt-WRKY17_col_a	3	0.00156331
TCP_tnt-TCP16_col_a	3	0.00156331
TCP_tnt-TCP14_col_b	3	0.00156331
REMB3_tnt-AT2G31460_col_a	3	0.00156331
NAC_tnt-AT3G12910_col_a	3	0.00156331
MYB_tnt-MYB105_col_a	3	0.00156331
MADS_tnt-AGL42_col_a	3	0.00156331
LOBAS2_tnt-AS2_col_a	3	0.00156331
HSF_tnt-HSFB3_col_a	3	0.00156331
G2like_tnt-At3g13040_col_b	3	0.00156331
EIL_tnt-EIL3_col_b	3	0.00156331
C3H_tnt-U2AF35B_col_a	3	0.00156331
C2H2_tnt-STOP1_col_a	3	0.00156331
BBRBPC_tnt-BPC5_col_a	3	0.00156331
bZIP_tnt-bZIP69_col_a	2	0.00104221
bZIP_tnt-bZIP43_col_a	2	0.00104221
bHLH_tnt-bHLH64_col_a	2	0.00104221
bHLH_tnt-bHLH104_col_b	2	0.00104221
bHLH_tnt-PIF7_col_a	2	0.00104221
WRKY_tnt-WRKY47_col_a	2	0.00104221
WRKY_tnt-WRKY26_col_a	2	0.00104221
Trihelix_tnt-AT3G25990_col_a	2	0.00104221
TCP_tnt-TCP1_col_a	2	0.00104221
MYB_tnt-MYB1_col_a	2	0.00104221
LIM_tnt-WLIM2A_col_a	2	0.00104221
FHA_tnt-FHA2_col_b	2	0.00104221
E2FDP_tnt-E2FC_col_a	2	0.00104221
CCAATHAP3_tnt-NFYB4_col_a	2	0.00104221
C3H_tnt-TZF9_col_a	2	0.00104221
C2H2_tnt-AT3G49930_col_a	2	0.00104221
C2C2gata_tnt-GATA20_col_a	2	0.00104221
C2C2gata_tnt-GATA19_col_a	2	0.00104221
AP2EREBP_tnt-CRF4_col_a	2	0.00104221
bHLH_tnt-bHLH77_col_a	1	0.000521105
bHLH_tnt-bHLH69_col_a	1	0.000521105
ND_tnt-AT1G63040_col_a	1	0.000521105
MYB_tnt-MYB52_col_a	1	0.000521105
MYB_tnt-MYB43_col_a	1	0.000521105
MADS_tnt-AGL55_col_a	1	0.000521105
Homeobox_tnt-WUS1_col_a	1	0.000521105
G2like_tnt-AT2G20400_col_a	1	0.000521105
C2H2_tnt-At2g48100_col_b	1	0.000521105
C2C2gata_tnt-GATA16_col_a	1	0.000521105
BBRBPC_tnt-BPC6_col_a	1	0.000521105
AP2EREBP_tnt-SHN3_col_a	1	0.000521105
AP2EREBP_tnt-PLT1_col_a	1	0.000521105

## Sheet: Table S7
Supplementary Table 7. Summary of the three most enriched binding motifs of the five TFs that bind to a large number of PE midpoint-proximal regions
The three most enriched TF binding motifs were determined using MEME-ChIP tool. The sequence logos of each motif are shown on Fig. 3 and Supplementary Fig. 3. Two sets of enriched motifs are shown: (i) specific to PE midpoint-proximal binding sites for each TF and (ii) the binding sites of each TF at the entire 3-kb PE regions.
(i) The enriched TF binding motifs specific to PE midpoint-proximal binding sites for each TF							(ii) The enriched TF binding motifs corresponding to the binding sites of each TF at the entire 3-kb PE region.
TF names in DAP-seq	Motif name	Width (nt)	Sites counts of each motifs	Log Likelihood Ratio	E-value		TF names in DAP-seq	Motif name	Width (nt)	Sites counts of each motifs	Log Likelihood Ratio	E-value
ARF_ecoli-MP_col	MOTIF 1	18	600	4036	4.4E-325		ARF_ecoli-MP_col	MOTIF 1	8	600	3888	1.6e-284
ARF_ecoli-MP_col	MOTIF 2	21	60	716	6e-40		ARF_ecoli-MP_col	MOTIF 2	21	64	744	3.3e-39
ARF_ecoli-MP_col	MOTIF 3	11	47	487	1.8e-09		ARF_ecoli-MP_col	MOTIF 3	15	32	366	0.034
C2C2dof_tnt-AT5G02460_col_a	MOTIF 1	19	600	4260	1.9E-414		C2C2dof_tnt-AT5G02460_col_a	MOTIF 1	11	600	4189	2.8E-402
C2C2dof_tnt-AT5G02460_col_a	MOTIF 2	15	108	1039	9.5e-43		C2C2dof_tnt-AT5G02460_col_a	MOTIF 2	15	144	1346	2e-70
C2C2dof_tnt-AT5G02460_col_a	MOTIF 3	15	29	335	26		C2C2dof_tnt-AT5G02460_col_a	MOTIF 3	21	10	178	5.6
C2C2dof_tnt-At5g62940_col_a	MOTIF 1	15	600	4246	7.1E-415		C2C2dof_tnt-At5g62940_col_a	MOTIF 1	15	600	4263	2.7E-418
C2C2dof_tnt-At5g62940_col_a	MOTIF 2	15	142	1287	1.6e-50		C2C2dof_tnt-At5g62940_col_a	MOTIF 2	6	562	3210	1.7e-22
C2C2dof_tnt-At5g62940_col_a	MOTIF 3	11	72	662	0.13		C2C2dof_tnt-At5g62940_col_a	MOTIF 3	15	28	334	0.17
G2like_tnt-At3g24120_col_a	MOTIF 1	11	600	4041	5.7E-343		G2like_tnt-At3g24120_col_a	MOTIF 1	11	600	4062	8.2E-352
G2like_tnt-At3g24120_col_a	MOTIF 2	21	59	667	5.2e-22		G2like_tnt-At3g24120_col_a	MOTIF 2	11	36	397	7.2e-09
G2like_tnt-At3g24120_col_a	MOTIF 3	8	58	536	2		G2like_tnt-At3g24120_col_a	MOTIF 3	11	25	283	1.5
MYB_tnt-MYB77_col_a	MOTIF 1	11	600	3823	9.7e-248		MYB_tnt-MYB77_col_a	MOTIF 1	10	599	3885	1.2e-277
MYB_tnt-MYB77_col_a	MOTIF 2	15	96	909	1.2e-23		MYB_tnt-MYB77_col_a	MOTIF 2	15	48	536	2.1e-16
MYB_tnt-MYB77_col_a	MOTIF 3	20	33	408	9.5e-05		MYB_tnt-MYB77_col_a	MOTIF 3	11	40	419	0.00013

## Sheet: Table S8
	Supplementary Table 8. Summary of the genomic features overlapping PEs
	The summary of genomic features overlapping intra- and intergenic PEs (for pie charts shown on Fig. 4b). The three panels are presented: (I) frequency of identified PEs in intra- and intergenic regions, (II) frequency of the overlapping genomic features at intra-genic PEs (a total of 1898 PEs), and (III) frequency of the overlapping genomic features at intergenic PEs (a total of 21 PEs).
	I. Frequency of identified PEs in intra- and inter-genic regions
		Number of PEs	Percentage of total PEs
	Intra-genic PEs	1898	0.989057
	Intergenic PEs	21	0.0109432
	II. Frequency of the overlapping genomic features at intra-genic PEs (a total of 1898 PEs).
	(a) Distribution of intra-genic PEs.
		Number of PEs	Percentage of total PEs
	1. Overlap only with protein-coding genes	1348	0.702
	2. Overlap with protein-coding genes and non-protein-coding genes	550	0.287
	(b) Frequency of non-protein-coding genomic features overlapping with intra-genic PEs (a total of 550 PEs)
		Number of PEs	Percentage of total PEs
	(i) Overlap with protein-coding genes and TEs	389	0.20271
	(ii) Overlap with protein-coding genes, TE and other non-protein-coding genes	Number of PEs	Percentage of total PEs
	TE and pseudogene	17	0.00885878
	TE and ncRNAs	7	0.00364773
	TE and tRNAs	11	0.00573215
	TE, ncRNAs and tRNA	1	0.000521105
	TE, pesudo, and tRNA	1	0.000521105
	(iii) Overlap with protein-coding genes and other non-protein-coding genes, but does not overlap with TEs	Number of PEs	Percentage of total PEs
	pseudo	37	0.0192809
	ncRNAs	15	0.00781657
	tRNA	57	0.029703
	miRNAs	7	0.00364773
	pseudo and ncRNA	2	0.00104221
	tRNA, sn snoRNA	1	0.000521105
	sn, snoRNA	2	0.00104221
	NA = TE genes	3	0.00156331
	(III) frequency of the overlapping genomic features at intergenic PEs (a total of 21 PEs)
		Number of PEs	Percentage of total PEs
	Overlap with TE	10	0.00521105
	Overlap with pseudogenes	1	0.000521105
	overlap with TE and pseudogenes	8	0.00416884
	Overlap snRNAs	2	0.00104221

## Sheet: Table S9
Supplementary Table 9. Genomic features overlapping PEs
The list of TAIR10 genomic features overlapping identified PEs (including both intra-genic and intergenic PEs). Columns from left to right: overlapping PE IDs, genomic coordinate and names of overlapping genomic features, and overlapping distance.
PE IDs	Genomic coordinate and information of overlapping genomic features
	Chromsome	Start	Stop	Feature name	Genomic feature information	Strand	Genome version	Overlapping length (nt)
PE_000001	chr1	33379	37871	gene	ID=AT1G01060;Note=protein_coding_gene;Name=AT1G01060	-	TAIR10	1612
PE_000001	chr1	31170	33153	gene	ID=AT1G01050;Note=protein_coding_gene;Name=AT1G01050	-	TAIR10	1162
PE_000002	chr1	119397	119997	gene	ID=AT1G01305;Note=protein_coding_gene;Name=AT1G01305	+	TAIR10	600
PE_000002	chr1	120154	121130	gene	ID=AT1G01310;Note=protein_coding_gene;Name=AT1G01310	+	TAIR10	976
PE_000002	chr1	121067	130577	gene	ID=AT1G01320;Note=protein_coding_gene;Name=AT1G01320	-	TAIR10	1148
PE_000003	chr1	120154	121130	gene	ID=AT1G01310;Note=protein_coding_gene;Name=AT1G01310	+	TAIR10	436
PE_000003	chr1	121067	130577	gene	ID=AT1G01320;Note=protein_coding_gene;Name=AT1G01320	-	TAIR10	2627
PE_000004	chr1	121067	130577	gene	ID=AT1G01320;Note=protein_coding_gene;Name=AT1G01320	-	TAIR10	279
PE_000004	chr1	132328	135831	gene	ID=AT1G01340;Note=protein_coding_gene;Name=AT1G01340	-	TAIR10	970
PE_000005	chr1	143564	145684	gene	ID=AT1G01370;Note=protein_coding_gene;Name=AT1G01370	+	TAIR10	1706
PE_000006	chr1	143564	145684	gene	ID=AT1G01370;Note=protein_coding_gene;Name=AT1G01370	+	TAIR10	1327
PE_000006	chr1	147153	147942	gene	ID=AT1G01380;Note=protein_coding_gene;Name=AT1G01380	+	TAIR10	204
PE_000007	chr1	150689	152210	gene	ID=AT1G01400;Note=protein_coding_gene;Name=AT1G01400	-	TAIR10	1273
PE_000007	chr1	153113	154198	gene	ID=AT1G01410;Note=protein_coding_gene;Name=AT1G01410	+	TAIR10	824
PE_000008	chr1	202136	204335	gene	ID=AT1G01560;Note=protein_coding_gene;Name=AT1G01560	+	TAIR10	1354
PE_000008	chr1	205176	207435	gene	ID=AT1G01570;Note=protein_coding_gene;Name=AT1G01570	+	TAIR10	805
PE_000009	chr1	232841	237817	gene	ID=AT1G01650;Note=protein_coding_gene;Name=AT1G01650	-	TAIR10	3000
PE_000010	chr1	252947	254495	gene	ID=AT1G01695;Note=protein_coding_gene;Name=AT1G01695	+	TAIR10	1355
PE_000010	chr1	255712	256074	transposable_element	ID=AT1TE00820;Name=AT1TE00820;Alias=HELITRONY3	-	TAIR10	362
PE_000010	chr1	255712	256074	transposon_fragment	Parent=AT1TE00820	-	TAIR10	362
PE_000010	chr1	256075	256920	transposable_element	ID=AT1TE00825;Name=AT1TE00825;Alias=ATHPOGON3	-	TAIR10	65
PE_000010	chr1	256075	256920	transposon_fragment	Parent=AT1TE00825	-	TAIR10	65
PE_000011	chr1	252947	254495	gene	ID=AT1G01695;Note=protein_coding_gene;Name=AT1G01695	+	TAIR10	701
PE_000011	chr1	255712	256074	transposable_element	ID=AT1TE00820;Name=AT1TE00820;Alias=HELITRONY3	-	TAIR10	362
PE_000011	chr1	255712	256074	transposon_fragment	Parent=AT1TE00820	-	TAIR10	362
PE_000011	chr1	256075	256920	transposable_element	ID=AT1TE00825;Name=AT1TE00825;Alias=ATHPOGON3	-	TAIR10	719
PE_000011	chr1	256075	256920	transposon_fragment	Parent=AT1TE00825	-	TAIR10	719
PE_000012	chr1	272111	274569	gene	ID=AT1G01740;Note=protein_coding_gene;Name=AT1G01740	-	TAIR10	1045
PE_000012	chr1	275366	276310	gene	ID=AT1G01750;Note=protein_coding_gene;Name=AT1G01750	+	TAIR10	944
PE_000012	chr1	276266	278448	gene	ID=AT1G01760;Note=protein_coding_gene;Name=AT1G01760	-	TAIR10	258
PE_000013	chr1	284610	291094	gene	ID=AT1G01790;Note=protein_coding_gene;Name=AT1G01790	+	TAIR10	1236
PE_000014	chr1	437951	439559	gene	ID=AT1G02250;Note=protein_coding_gene;Name=AT1G02250	-	TAIR10	1115
PE_000014	chr1	440441	442877	gene	ID=AT1G02260;Note=protein_coding_gene;Name=AT1G02260	-	TAIR10	1003
PE_000015	chr1	477000	478971	gene	ID=AT1G02380;Note=protein_coding_gene;Name=AT1G02380	+	TAIR10	1543
PE_000016	chr1	477000	478971	gene	ID=AT1G02380;Note=protein_coding_gene;Name=AT1G02380	+	TAIR10	1283
PE_000017	chr1	582413	582922	pseudogene	ID=AT1G02681;Note=pseudogene;Name=AT1G02681	+	TAIR10	349
PE_000017	chr1	582413	582922	pseudogenic_transcript	ID=AT1G02681.1;Parent=AT1G02681;Name=AT1G02681.1;Index=1	+	TAIR10	349
PE_000017	chr1	582413	582922	pseudogenic_exon	Parent=AT1G02681.1	+	TAIR10	349
PE_000017	chr1	584260	587219	gene	ID=AT1G02690;Note=protein_coding_gene;Name=AT1G02690	+	TAIR10	1313
PE_000018	chr1	594573	598657	gene	ID=AT1G02730;Note=protein_coding_gene;Name=AT1G02730	-	TAIR10	1333
PE_000018	chr1	599416	602038	gene	ID=AT1G02740;Note=protein_coding_gene;Name=AT1G02740	-	TAIR10	908
PE_000019	chr1	630505	633259	gene	ID=AT1G02850;Note=protein_coding_gene;Name=AT1G02850	+	TAIR10	1240
PE_000019	chr1	634246	634464	transposable_element	ID=AT1TE02060;Name=AT1TE02060;Alias=RP1_AT	+	TAIR10	218
PE_000019	chr1	634246	634464	transposon_fragment	Parent=AT1TE02060	+	TAIR10	218
PE_000020	chr1	710018	711803	gene	ID=AT1G03055;Note=protein_coding_gene;Name=AT1G03055	-	TAIR10	1394
PE_000020	chr1	712473	726891	gene	ID=AT1G03060;Note=protein_coding_gene;Name=AT1G03060	-	TAIR10	936
PE_000021	chr1	854410	859701	gene	ID=AT1G03445;Note=protein_coding_gene;Name=AT1G03445	-	TAIR10	601
PE_000021	chr1	860788	864125	gene	ID=AT1G03457;Note=protein_coding_gene;Name=AT1G03457	-	TAIR10	1312
PE_000022	chr1	871874	872906	gene	ID=AT1G03490;Note=protein_coding_gene;Name=AT1G03490	+	TAIR10	1032
PE_000022	chr1	873184	874935	gene	ID=AT1G03495;Note=protein_coding_gene;Name=AT1G03495	+	TAIR10	1272
PE_000023	chr1	941062	943377	gene	ID=AT1G03760;Note=protein_coding_gene;Name=AT1G03760	-	TAIR10	1489
PE_000023	chr1	944572	947483	gene	ID=AT1G03770;Note=protein_coding_gene;Name=AT1G03770	+	TAIR10	316
PE_000023	chr1	943765	944176	transposable_element	ID=AT1TE03080;Name=AT1TE03080;Alias=HELITRONY3	-	TAIR10	411
PE_000023	chr1	943765	944176	transposon_fragment	Parent=AT1TE03080	-	TAIR10	411
PE_000024	chr1	941062	943377	gene	ID=AT1G03760;Note=protein_coding_gene;Name=AT1G03760	-	TAIR10	288
PE_000024	chr1	944572	947483	gene	ID=AT1G03770;Note=protein_coding_gene;Name=AT1G03770	+	TAIR10	1517
PE_000024	chr1	943765	944176	transposable_element	ID=AT1TE03080;Name=AT1TE03080;Alias=HELITRONY3	-	TAIR10	411
PE_000024	chr1	943765	944176	transposon_fragment	Parent=AT1TE03080	-	TAIR10	411
PE_000025	chr1	947520	951827	gene	ID=AT1G03780;Note=protein_coding_gene;Name=AT1G03780	-	TAIR10	1345
PE_000026	chr1	967503	970130	gene	ID=AT1G03840;Note=protein_coding_gene;Name=AT1G03840	-	TAIR10	893
PE_000026	chr1	962016	966757	gene	ID=AT1G03830;Note=protein_coding_gene;Name=AT1G03830	-	TAIR10	1361
PE_000027	chr1	1001321	1004383	gene	ID=AT1G03920;Note=protein_coding_gene;Name=AT1G03920	+	TAIR10	851
PE_000027	chr1	996115	1000437	gene	ID=AT1G03910;Note=protein_coding_gene;Name=AT1G03910	+	TAIR10	1265
PE_000028	chr1	1009542	1011056	gene	ID=AT1G03940;Note=protein_coding_gene;Name=AT1G03940	-	TAIR10	1238
PE_000028	chr1	1011172	1013365	gene	ID=AT1G03950;Note=protein_coding_gene;Name=AT1G03950	-	TAIR10	1646
PE_000029	chr1	1022251	1023719	gene	ID=AT1G03982;Note=protein_coding_gene;Name=AT1G03982	-	TAIR10	752
PE_000029	chr1	1024847	1027616	gene	ID=AT1G03990;Note=protein_coding_gene;Name=AT1G03990	+	TAIR10	1120
PE_000030	chr1	1031200	1036237	gene	ID=AT1G04010;Note=protein_coding_gene;Name=AT1G04010	-	TAIR10	984
PE_000031	chr1	1031200	1036237	gene	ID=AT1G04010;Note=protein_coding_gene;Name=AT1G04010	-	TAIR10	1328
PE_000032	chr1	1051312	1056827	gene	ID=AT1G04080;Note=protein_coding_gene;Name=AT1G04080	+	TAIR10	3000
PE_000033	chr1	1061457	1063784	gene	ID=AT1G04110;Note=protein_coding_gene;Name=AT1G04110	-	TAIR10	833
PE_000033	chr1	1064450	1071047	gene	ID=AT1G04120;Note=protein_coding_gene;Name=AT1G04120	-	TAIR10	1501
PE_000034	chr1	1081208	1084246	gene	ID=AT1G04150;Note=protein_coding_gene;Name=AT1G04150	-	TAIR10	1442
PE_000035	chr1	1081208	1084246	gene	ID=AT1G04150;Note=protein_coding_gene;Name=AT1G04150	-	TAIR10	1031
PE_000036	chr1	1252122	1257510	gene	ID=AT1G04580;Note=protein_coding_gene;Name=AT1G04580	-	TAIR10	623
PE_000036	chr1	1258577	1261426	gene	ID=AT1G04590;Note=protein_coding_gene;Name=AT1G04590	-	TAIR10	1310
PE_000037	chr1	1279388	1281618	gene	ID=AT1G04610;Note=protein_coding_gene;Name=AT1G04610	+	TAIR10	2071
PE_000038	chr1	1279388	1281618	gene	ID=AT1G04610;Note=protein_coding_gene;Name=AT1G04610	+	TAIR10	323
PE_000038	chr1	1282741	1286584	gene	ID=AT1G04620;Note=protein_coding_gene;Name=AT1G04620	-	TAIR10	1554
PE_000039	chr1	1292080	1293357	gene	ID=AT1G04640;Note=protein_coding_gene;Name=AT1G04640	+	TAIR10	415
PE_000039	chr1	1293770	1294263	gene	ID=AT1G04645;Note=protein_coding_gene;Name=AT1G04645	-	TAIR10	493
PE_000039	chr1	1293504	1293596	transposable_element	ID=AT1TE04220;Name=AT1TE04220;Alias=SIMPLEHAT2	+	TAIR10	92
PE_000039	chr1	1293504	1293596	transposon_fragment	Parent=AT1TE04220	+	TAIR10	92
PE_000039	chr1	1294893	1299002	gene	ID=AT1G04650;Note=protein_coding_gene;Name=AT1G04650	-	TAIR10	1049
PE_000040	chr1	1316254	1320919	gene	ID=AT1G04700;Note=protein_coding_gene;Name=AT1G04700	+	TAIR10	1490
PE_000040	chr1	1321904	1324782	gene	ID=AT1G04710;Note=protein_coding_gene;Name=AT1G04710	+	TAIR10	525
PE_000041	chr1	1316254	1320919	gene	ID=AT1G04700;Note=protein_coding_gene;Name=AT1G04700	+	TAIR10	586
PE_000041	chr1	1321904	1324782	gene	ID=AT1G04710;Note=protein_coding_gene;Name=AT1G04710	+	TAIR10	1429
PE_000042	chr1	1321904	1324782	gene	ID=AT1G04710;Note=protein_coding_gene;Name=AT1G04710	+	TAIR10	1411
PE_000042	chr1	1324923	1324960	gene	ID=AT1G04720;Note=tRNA;Name=AT1G04720	+	TAIR10	37
PE_000042	chr1	1324923	1324960	tRNA	ID=AT1G04720.1;Parent=AT1G04720;Name=AT1G04720.1;Index=1	+	TAIR10	37
PE_000042	chr1	1325296	1331086	gene	ID=AT1G04730;Note=protein_coding_gene;Name=AT1G04730	-	TAIR10	1075
PE_000043	chr1	1350180	1355442	gene	ID=AT1G04810;Note=protein_coding_gene;Name=AT1G04810	+	TAIR10	1820
PE_000043	chr1	1356191	1358386	gene	ID=AT1G04820;Note=protein_coding_gene;Name=AT1G04820	-	TAIR10	431
PE_000044	chr1	1350180	1355442	gene	ID=AT1G04810;Note=protein_coding_gene;Name=AT1G04810	+	TAIR10	1149
PE_000044	chr1	1356191	1358386	gene	ID=AT1G04820;Note=protein_coding_gene;Name=AT1G04820	-	TAIR10	1102
PE_000045	chr1	1380382	1382599	gene	ID=AT1G04890;Note=protein_coding_gene;Name=AT1G04890	-	TAIR10	270
PE_000045	chr1	1383841	1387895	gene	ID=AT1G04900;Note=protein_coding_gene;Name=AT1G04900	+	TAIR10	1488
PE_000045	chr1	1383410	1383734	transposable_element	ID=AT1TE04510;Name=AT1TE04510;Alias=ATREP1	+	TAIR10	324
PE_000045	chr1	1383410	1383734	transposon_fragment	Parent=AT1TE04510	+	TAIR10	324
PE_000046	chr1	1383841	1387895	gene	ID=AT1G04900;Note=protein_coding_gene;Name=AT1G04900	+	TAIR10	1857
PE_000046	chr1	1387871	1391187	gene	ID=AT1G04910;Note=protein_coding_gene;Name=AT1G04910	-	TAIR10	1167
PE_000047	chr1	1413644	1416144	gene	ID=AT1G04980;Note=protein_coding_gene;Name=AT1G04980	-	TAIR10	1429
PE_000047	chr1	1416343	1418482	gene	ID=AT1G04985;Note=protein_coding_gene;Name=AT1G04985	-	TAIR10	1372
PE_000047	chr1	1417569	1417699	transposable_element	ID=AT1TE04620;Name=AT1TE04620;Alias=ATDNA1T9A	+	TAIR10	130
PE_000047	chr1	1417569	1417699	transposon_fragment	Parent=AT1TE04620	+	TAIR10	130
PE_000048	chr1	1477500	1478821	pseudogene	ID=AT1G05135;Note=pseudogene;Name=AT1G05135	-	TAIR10	256
PE_000048	chr1	1477500	1478821	pseudogenic_transcript	ID=AT1G05135.1;Parent=AT1G05135;Name=AT1G05135.1;Index=1	-	TAIR10	256
PE_000048	chr1	1477500	1478821	pseudogenic_exon	Parent=AT1G05135.1	-	TAIR10	256
PE_000048	chr1	1476478	1476716	transposable_element	ID=AT1TE04830;Name=AT1TE04830;Alias=ATDNATA1	+	TAIR10	238
PE_000048	chr1	1476478	1476716	transposon_fragment	Parent=AT1TE04830	+	TAIR10	238
PE_000048	chr1	1477673	1478083	transposable_element	ID=AT1TE04835;Name=AT1TE04835;Alias=ATGP1	-	TAIR10	83
PE_000048	chr1	1477673	1478083	transposon_fragment	Parent=AT1TE04835	-	TAIR10	83
PE_000048	chr1	1471406	1476078	gene	ID=AT1G05120;Note=protein_coding_gene;Name=AT1G05120	-	TAIR10	1322
PE_000049	chr1	1558844	1559903	gene	ID=AT1G05340;Note=protein_coding_gene;Name=AT1G05340	-	TAIR10	977
PE_000049	chr1	1560678	1564123	gene	ID=AT1G05350;Note=protein_coding_gene;Name=AT1G05350	-	TAIR10	1248
PE_000050	chr1	1594057	1595818	gene	ID=AT1G05430;Note=protein_coding_gene;Name=AT1G05430	-	TAIR10	1366
PE_000050	chr1	1592656	1593745	transposable_element	ID=AT1TE05225;Name=AT1TE05225;Alias=HELITRONY3	+	TAIR10	1089
PE_000050	chr1	1592656	1593745	transposon_fragment	Parent=AT1TE05225	+	TAIR10	1089
PE_000051	chr1	1709796	1713245	gene	ID=AT1G05700;Note=protein_coding_gene;Name=AT1G05700	+	TAIR10	1238
PE_000051	chr1	1714950	1717276	gene	ID=AT1G05710;Note=protein_coding_gene;Name=AT1G05710	+	TAIR10	57
PE_000052	chr1	1779256	1784529	gene	ID=AT1G05890;Note=protein_coding_gene;Name=AT1G05890	+	TAIR10	1392
PE_000052	chr1	1784803	1786292	gene	ID=AT1G05894;Note=protein_coding_gene;Name=AT1G05894	+	TAIR10	1334
PE_000053	chr1	1790224	1796647	gene	ID=AT1G05910;Note=protein_coding_gene;Name=AT1G05910	+	TAIR10	1313
PE_000053	chr1	1796778	1798254	gene	ID=AT1G05920;Note=protein_coding_gene;Name=AT1G05920	+	TAIR10	1476
PE_000054	chr1	1796778	1798254	gene	ID=AT1G05920;Note=protein_coding_gene;Name=AT1G05920	+	TAIR10	633
PE_000054	chr1	1798901	1799062	gene	ID=AT1G05925;Note=protein_coding_gene;Name=AT1G05925	-	TAIR10	161
PE_000054	chr1	1799418	1800933	gene	ID=AT1G05930;Note=protein_coding_gene;Name=AT1G05930	+	TAIR10	1203
PE_000055	chr1	1884981	1886897	gene	ID=AT1G06170;Note=protein_coding_gene;Name=AT1G06170	-	TAIR10	921
PE_000056	chr1	1926791	1930258	gene	ID=AT1G06310;Note=protein_coding_gene;Name=AT1G06310	+	TAIR10	1308
PE_000056	chr1	1930523	1931449	gene	ID=AT1G06320;Note=protein_coding_gene;Name=AT1G06320	+	TAIR10	926
PE_000056	chr1	1931671	1932266	gene	ID=AT1G06330;Note=protein_coding_gene;Name=AT1G06330	-	TAIR10	279
PE_000057	chr1	1950844	1952785	gene	ID=AT1G06400;Note=protein_coding_gene;Name=AT1G06400	-	TAIR10	1289
PE_000057	chr1	1946788	1950860	gene	ID=AT1G06390;Note=protein_coding_gene;Name=AT1G06390	+	TAIR10	1727
PE_000058	chr1	2089417	2091686	gene	ID=AT1G06800;Note=protein_coding_gene;Name=AT1G06800	-	TAIR10	21
PE_000058	chr1	2091738	2092528	gene	ID=AT1G06810;Note=protein_coding_gene;Name=AT1G06810	-	TAIR10	790
PE_000058	chr1	2092946	2096232	gene	ID=AT1G06820;Note=protein_coding_gene;Name=AT1G06820	-	TAIR10	1719
PE_000059	chr1	2108593	2110986	gene	ID=AT1G06870;Note=protein_coding_gene;Name=AT1G06870	+	TAIR10	1307
PE_000059	chr1	2111148	2111218	gene	ID=AT1G06880;Note=tRNA;Name=AT1G06880	-	TAIR10	70
PE_000059	chr1	2111148	2111218	tRNA	ID=AT1G06880.1;Parent=AT1G06880;Name=AT1G06880.1;Index=1	-	TAIR10	70
PE_000059	chr1	2111363	2114601	gene	ID=AT1G06890;Note=protein_coding_gene;Name=AT1G06890	-	TAIR10	1316
PE_000060	chr1	2126749	2128060	gene	ID=AT1G06923;Note=protein_coding_gene;Name=AT1G06923	+	TAIR10	1275
PE_000060	chr1	2127704	2128611	gene	ID=AT1G06925;Note=protein_coding_gene;Name=AT1G06925	-	TAIR10	907
PE_000060	chr1	2128843	2129883	gene	ID=AT1G06930;Note=protein_coding_gene;Name=AT1G06930	+	TAIR10	942
PE_000061	chr1	2177885	2177958	gene	ID=AT1G07100;Note=tRNA;Name=AT1G07100	+	TAIR10	73
PE_000061	chr1	2177885	2177958	tRNA	ID=AT1G07100.1;Parent=AT1G07100;Name=AT1G07100.1;Index=1	+	TAIR10	73
PE_000061	chr1	2178104	2184148	gene	ID=AT1G07110;Note=protein_coding_gene;Name=AT1G07110	-	TAIR10	1172
PE_000062	chr1	2204320	2206934	gene	ID=AT1G07180;Note=protein_coding_gene;Name=AT1G07180	+	TAIR10	1035
PE_000062	chr1	2208013	2208177	gene	ID=AT1G07190;Note=protein_coding_gene;Name=AT1G07190	+	TAIR10	164
PE_000062	chr1	2208719	2212546	gene	ID=AT1G07200;Note=protein_coding_gene;Name=AT1G07200	-	TAIR10	180
PE_000063	chr1	2229757	2232897	gene	ID=AT1G07270;Note=protein_coding_gene;Name=AT1G07270	-	TAIR10	1284
PE_000063	chr1	2227594	2229319	gene	ID=AT1G07260;Note=protein_coding_gene;Name=AT1G07260	-	TAIR10	1278
PE_000064	chr1	2229757	2232897	gene	ID=AT1G07270;Note=protein_coding_gene;Name=AT1G07270	-	TAIR10	1662
PE_000064	chr1	2227594	2229319	gene	ID=AT1G07260;Note=protein_coding_gene;Name=AT1G07260	-	TAIR10	900
PE_000065	chr1	2254822	2256850	gene	ID=AT1G07340;Note=protein_coding_gene;Name=AT1G07340	+	TAIR10	223
PE_000065	chr1	2257425	2260101	gene	ID=AT1G07350;Note=protein_coding_gene;Name=AT1G07350	-	TAIR10	2202
PE_000066	chr1	2257425	2260101	gene	ID=AT1G07350;Note=protein_coding_gene;Name=AT1G07350	-	TAIR10	1095
PE_000066	chr1	2260389	2262865	gene	ID=AT1G07360;Note=protein_coding_gene;Name=AT1G07360	-	TAIR10	1617
PE_000067	chr1	2269893	2274820	gene	ID=AT1G07390;Note=protein_coding_gene;Name=AT1G07390	+	TAIR10	1539
PE_000067	chr1	2274943	2275758	gene	ID=AT1G07400;Note=protein_coding_gene;Name=AT1G07400	+	TAIR10	815
PE_000067	chr1	2276053	2277154	gene	ID=AT1G07410;Note=protein_coding_gene;Name=AT1G07410	+	TAIR10	228
PE_000068	chr1	2277807	2280297	gene	ID=AT1G07420;Note=protein_coding_gene;Name=AT1G07420	+	TAIR10	1062
PE_000068	chr1	2280835	2282828	gene	ID=AT1G07430;Note=protein_coding_gene;Name=AT1G07430	-	TAIR10	1400
PE_000069	chr1	2294566	2295489	gene	ID=AT1G07473;Note=protein_coding_gene;Name=AT1G07473	-	TAIR10	923
PE_000069	chr1	2295751	2296497	gene	ID=AT1G07476;Note=protein_coding_gene;Name=AT1G07476	+	TAIR10	440
PE_000069	chr1	2296023	2299470	gene	ID=AT1G07480;Note=protein_coding_gene;Name=AT1G07480	-	TAIR10	168
PE_000069	chr1	2291457	2294588	gene	ID=AT1G07470;Note=protein_coding_gene;Name=AT1G07470	+	TAIR10	1397
PE_000070	chr1	2313582	2316469	gene	ID=AT1G07530;Note=protein_coding_gene;Name=AT1G07530	-	TAIR10	5
PE_000070	chr1	2318433	2321048	gene	ID=AT1G07540;Note=protein_coding_gene;Name=AT1G07540	-	TAIR10	1031
PE_000071	chr1	2318433	2321048	gene	ID=AT1G07540;Note=protein_coding_gene;Name=AT1G07540	-	TAIR10	1555
PE_000072	chr1	2359549	2366561	gene	ID=AT1G07650;Note=protein_coding_gene;Name=AT1G07650	-	TAIR10	3000
PE_000073	chr1	2426745	2428719	gene	ID=AT1G07850;Note=protein_coding_gene;Name=AT1G07850	+	TAIR10	1626
PE_000073	chr1	2424054	2426676	gene	ID=AT1G07840;Note=protein_coding_gene;Name=AT1G07840	+	TAIR10	1305
PE_000074	chr1	2462953	2465504	gene	ID=AT1G07940;Note=protein_coding_gene;Name=AT1G07940	-	TAIR10	844
PE_000074	chr1	2461274	2462129	transposable_element	ID=AT1TE08020;Name=AT1TE08020;Alias=ATREP3	-	TAIR10	855
PE_000074	chr1	2461274	2462129	transposon_fragment	Parent=AT1TE08020	-	TAIR10	855
PE_000075	chr1	2498836	2501427	gene	ID=AT1G08050;Note=protein_coding_gene;Name=AT1G08050	-	TAIR10	1414
PE_000075	chr1	2501742	2511084	gene	ID=AT1G08060;Note=protein_coding_gene;Name=AT1G08060	-	TAIR10	1271
PE_000076	chr1	2498836	2501427	gene	ID=AT1G08050;Note=protein_coding_gene;Name=AT1G08050	-	TAIR10	1029
PE_000076	chr1	2501742	2511084	gene	ID=AT1G08060;Note=protein_coding_gene;Name=AT1G08060	-	TAIR10	1656
PE_000077	chr1	2573848	2576714	gene	ID=AT1G08200;Note=protein_coding_gene;Name=AT1G08200	-	TAIR10	1093
PE_000077	chr1	2567475	2573393	gene	ID=AT1G08190;Note=protein_coding_gene;Name=AT1G08190	+	TAIR10	1452
PE_000078	chr1	2614774	2618823	gene	ID=AT1G08300;Note=protein_coding_gene;Name=AT1G08300	+	TAIR10	2045
PE_000078	chr1	2618647	2620452	gene	ID=AT1G08310;Note=protein_coding_gene;Name=AT1G08310	+	TAIR10	1131
PE_000079	chr1	2614774	2618823	gene	ID=AT1G08300;Note=protein_coding_gene;Name=AT1G08300	+	TAIR10	1643
PE_000079	chr1	2618647	2620452	gene	ID=AT1G08310;Note=protein_coding_gene;Name=AT1G08310	+	TAIR10	1533
PE_000080	chr1	2631068	2632871	gene	ID=AT1G08340;Note=protein_coding_gene;Name=AT1G08340	+	TAIR10	1011
PE_000081	chr1	2657418	2657920	transposable_element	ID=AT1TE08660;Name=AT1TE08660;Alias=ATLANTYS3	+	TAIR10	502
PE_000081	chr1	2657418	2657920	transposon_fragment	Parent=AT1TE08660	+	TAIR10	502
PE_000081	chr1	2649537	2657120	gene	ID=AT1G08420;Note=protein_coding_gene;Name=AT1G08420	+	TAIR10	1681
PE_000082	chr1	2736774	2743758	gene	ID=AT1G08620;Note=protein_coding_gene;Name=AT1G08620	+	TAIR10	1620
PE_000082	chr1	2743761	2747967	gene	ID=AT1G08630;Note=protein_coding_gene;Name=AT1G08630	-	TAIR10	1377
PE_000083	chr1	2743761	2747967	gene	ID=AT1G08630;Note=protein_coding_gene;Name=AT1G08630	-	TAIR10	1353
PE_000083	chr1	2748398	2751278	gene	ID=AT1G08640;Note=protein_coding_gene;Name=AT1G08640	-	TAIR10	1216
PE_000084	chr1	2774030	2779297	gene	ID=AT1G08720;Note=protein_coding_gene;Name=AT1G08720	+	TAIR10	811
PE_000084	chr1	2779963	2788447	gene	ID=AT1G08730;Note=protein_coding_gene;Name=AT1G08730	+	TAIR10	1523
PE_000085	chr1	2821552	2825275	gene	ID=AT1G08820;Note=protein_coding_gene;Name=AT1G08820	-	TAIR10	2237
PE_000086	chr1	2873465	2877270	gene	ID=AT1G08930;Note=protein_coding_gene;Name=AT1G08930	+	TAIR10	1214
PE_000086	chr1	2877692	2879169	gene	ID=AT1G08940;Note=protein_coding_gene;Name=AT1G08940	+	TAIR10	1364
PE_000087	chr1	2891037	2895182	gene	ID=AT1G09000;Note=protein_coding_gene;Name=AT1G09000	+	TAIR10	1595
PE_000087	chr1	2895166	2899384	gene	ID=AT1G09010;Note=protein_coding_gene;Name=AT1G09010	-	TAIR10	1421
PE_000088	chr1	2939570	2942288	gene	ID=AT1G09130;Note=protein_coding_gene;Name=AT1G09130	-	TAIR10	279
PE_000088	chr1	2942564	2945961	gene	ID=AT1G09140;Note=protein_coding_gene;Name=AT1G09140	-	TAIR10	2445
PE_000089	chr1	2994369	2998222	gene	ID=AT1G09270;Note=protein_coding_gene;Name=AT1G09270	+	TAIR10	1653
PE_000089	chr1	2998100	3001315	gene	ID=AT1G09280;Note=protein_coding_gene;Name=AT1G09280	-	TAIR10	1469
PE_000090	chr1	3003495	3008213	gene	ID=AT1G09300;Note=protein_coding_gene;Name=AT1G09300	+	TAIR10	704
PE_000090	chr1	3009055	3009880	gene	ID=AT1G09310;Note=protein_coding_gene;Name=AT1G09310	+	TAIR10	825
PE_000090	chr1	3009941	3012363	gene	ID=AT1G09320;Note=protein_coding_gene;Name=AT1G09320	-	TAIR10	568
PE_000091	chr1	3033512	3035036	gene	ID=AT1G09400;Note=protein_coding_gene;Name=AT1G09400	-	TAIR10	1104
PE_000091	chr1	3035443	3037560	gene	ID=AT1G09410;Note=protein_coding_gene;Name=AT1G09410	+	TAIR10	1489
PE_000092	chr1	3049024	3053112	gene	ID=AT1G09450;Note=protein_coding_gene;Name=AT1G09450	+	TAIR10	1407
PE_000092	chr1	3045513	3047893	gene	ID=AT1G09440;Note=protein_coding_gene;Name=AT1G09440	-	TAIR10	462
PE_000093	chr1	3055231	3057443	gene	ID=AT1G09470;Note=protein_coding_gene;Name=AT1G09470	-	TAIR10	1765
PE_000093	chr1	3057975	3060661	gene	ID=AT1G09480;Note=protein_coding_gene;Name=AT1G09480	+	TAIR10	703
PE_000094	chr1	3055231	3057443	gene	ID=AT1G09470;Note=protein_coding_gene;Name=AT1G09470	-	TAIR10	1370
PE_000094	chr1	3057975	3060661	gene	ID=AT1G09480;Note=protein_coding_gene;Name=AT1G09480	+	TAIR10	1098
PE_000095	chr1	3244213	3247200	gene	ID=AT1G09960;Note=protein_coding_gene;Name=AT1G09960	+	TAIR10	742
PE_000095	chr1	3247448	3247570	transposable_element	ID=AT1TE10550;Name=AT1TE10550;Alias=HELITRONY3A	+	TAIR10	122
PE_000095	chr1	3247448	3247570	transposon_fragment	Parent=AT1TE10550	+	TAIR10	122
PE_000096	chr1	3279270	3283482	gene	ID=AT1G10050;Note=protein_coding_gene;Name=AT1G10050	+	TAIR10	886
PE_000096	chr1	3284239	3287107	gene	ID=AT1G10060;Note=protein_coding_gene;Name=AT1G10060	+	TAIR10	1357
PE_000097	chr1	3284239	3287107	gene	ID=AT1G10060;Note=protein_coding_gene;Name=AT1G10060	+	TAIR10	1036
PE_000097	chr1	3288087	3290471	gene	ID=AT1G10070;Note=protein_coding_gene;Name=AT1G10070	+	TAIR10	984
PE_000098	chr1	3288087	3290471	gene	ID=AT1G10070;Note=protein_coding_gene;Name=AT1G10070	+	TAIR10	1336
PE_000098	chr1	3290311	3296198	gene	ID=AT1G10090;Note=protein_coding_gene;Name=AT1G10090	-	TAIR10	1824
PE_000099	chr1	3288087	3290471	gene	ID=AT1G10070;Note=protein_coding_gene;Name=AT1G10070	+	TAIR10	677
PE_000099	chr1	3290311	3296198	gene	ID=AT1G10090;Note=protein_coding_gene;Name=AT1G10090	-	TAIR10	2483
PE_000100	chr1	3338303	3341608	gene	ID=AT1G10180;Note=protein_coding_gene;Name=AT1G10180	-	TAIR10	2246
PE_000101	chr1	3381601	3383914	gene	ID=AT1G10310;Note=protein_coding_gene;Name=AT1G10310	-	TAIR10	1449
PE_000101	chr1	3384164	3388373	gene	ID=AT1G10320;Note=protein_coding_gene;Name=AT1G10320	-	TAIR10	1301
PE_000102	chr1	3403224	3405856	gene	ID=AT1G10385;Note=protein_coding_gene;Name=AT1G10385	+	TAIR10	349
PE_000102	chr1	3407024	3412843	gene	ID=AT1G10390;Note=protein_coding_gene;Name=AT1G10390	-	TAIR10	1483
PE_000103	chr1	3428031	3428425	pseudogene	ID=AT1G10419;Note=pseudogene;Name=AT1G10419	+	TAIR10	394
PE_000103	chr1	3428031	3428425	pseudogenic_transcript	ID=AT1G10419.1;Parent=AT1G10419;Name=AT1G10419.1;Index=1	+	TAIR10	394
PE_000103	chr1	3428031	3428425	pseudogenic_exon	Parent=AT1G10419.1	+	TAIR10	394
PE_000103	chr1	3428478	3430633	gene	ID=AT1G10430;Note=protein_coding_gene;Name=AT1G10430	-	TAIR10	686
PE_000103	chr1	3427848	3427917	transposable_element	ID=AT1TE11150;Name=AT1TE11150;Alias=HELITRONY1A	+	TAIR10	69
PE_000103	chr1	3427848	3427917	transposon_fragment	Parent=AT1TE11150	+	TAIR10	69
PE_000103	chr1	3424186	3427457	gene	ID=AT1G10417;Note=protein_coding_gene;Name=AT1G10417	-	TAIR10	1293
PE_000104	chr1	3474515	3474765	pseudogene	ID=AT1G10538;Note=pseudogene;Name=AT1G10538	+	TAIR10	250
PE_000104	chr1	3474515	3474765	pseudogenic_transcript	ID=AT1G10538.1;Parent=AT1G10538;Name=AT1G10538.1;Index=1	+	TAIR10	250
PE_000104	chr1	3474515	3474765	pseudogenic_exon	Parent=AT1G10538.1	+	TAIR10	250
PE_000104	chr1	3474864	3477927	gene	ID=AT1G10540;Note=protein_coding_gene;Name=AT1G10540	-	TAIR10	1084
PE_000105	chr1	3474864	3477927	gene	ID=AT1G10540;Note=protein_coding_gene;Name=AT1G10540	-	TAIR10	1359
PE_000105	chr1	3479153	3480988	gene	ID=AT1G10550;Note=protein_coding_gene;Name=AT1G10550	-	TAIR10	415
PE_000106	chr1	3506186	3509006	gene	ID=AT1G10610;Note=protein_coding_gene;Name=AT1G10610	+	TAIR10	1174
PE_000106	chr1	3509001	3511975	gene	ID=AT1G10620;Note=protein_coding_gene;Name=AT1G10620	-	TAIR10	1831
PE_000107	chr1	3627726	3630765	gene	ID=AT1G10890;Note=protein_coding_gene;Name=AT1G10890	+	TAIR10	1712
PE_000107	chr1	3630277	3630404	transposable_element	ID=AT1TE11810;Name=AT1TE11810;Alias=ATDNAI27T9A	-	TAIR10	127
PE_000107	chr1	3630277	3630404	transposon_fragment	Parent=AT1TE11810	-	TAIR10	127
PE_000108	chr1	3703672	3709302	gene	ID=AT1G11100;Note=protein_coding_gene;Name=AT1G11100	-	TAIR10	1141
PE_000108	chr1	3710208	3712503	gene	ID=AT1G11110;Note=protein_coding_gene;Name=AT1G11110	+	TAIR10	953
PE_000109	chr1	3703672	3709302	gene	ID=AT1G11100;Note=protein_coding_gene;Name=AT1G11100	-	TAIR10	647
PE_000109	chr1	3710208	3712503	gene	ID=AT1G11110;Note=protein_coding_gene;Name=AT1G11110	+	TAIR10	1447
PE_000110	chr1	3722857	3727450	gene	ID=AT1G11130;Note=protein_coding_gene;Name=AT1G11130	+	TAIR10	1362
PE_000111	chr1	3794238	3800719	gene	ID=AT1G11300;Note=protein_coding_gene;Name=AT1G11300	+	TAIR10	1536
PE_000111	chr1	3800738	3804185	gene	ID=AT1G11310;Note=protein_coding_gene;Name=AT1G11310	-	TAIR10	1445
PE_000112	chr1	3837821	3840207	gene	ID=AT1G11400;Note=protein_coding_gene;Name=AT1G11400	+	TAIR10	1425
PE_000112	chr1	3841286	3844432	gene	ID=AT1G11410;Note=protein_coding_gene;Name=AT1G11410	+	TAIR10	496
PE_000113	chr1	3841286	3844432	gene	ID=AT1G11410;Note=protein_coding_gene;Name=AT1G11410	+	TAIR10	1837
PE_000113	chr1	3844581	3846872	gene	ID=AT1G11420;Note=protein_coding_gene;Name=AT1G11420	-	TAIR10	1014
PE_000114	chr1	3919272	3919774	gene	ID=AT1G11655;Note=protein_coding_gene;Name=AT1G11655	+	TAIR10	502
PE_000114	chr1	3918677	3919183	transposable_element	ID=AT1TE12750;Name=AT1TE12750;Alias=ATREP5	+	TAIR10	506
PE_000114	chr1	3918677	3919183	transposon_fragment	Parent=AT1TE12750	+	TAIR10	506
PE_000114	chr1	3914774	3918176	gene	ID=AT1G11650;Note=protein_coding_gene;Name=AT1G11650	+	TAIR10	1257
PE_000115	chr1	4014847	4016540	gene	ID=AT1G11905;Note=protein_coding_gene;Name=AT1G11905	+	TAIR10	618
PE_000115	chr1	4016784	4020983	gene	ID=AT1G11910;Note=protein_coding_gene;Name=AT1G11910	-	TAIR10	2138
PE_000116	chr1	4034587	4038758	gene	ID=AT1G11950;Note=protein_coding_gene;Name=AT1G11950	-	TAIR10	335
PE_000116	chr1	4039711	4043880	gene	ID=AT1G11960;Note=protein_coding_gene;Name=AT1G11960	-	TAIR10	1712
PE_000117	chr1	4282899	4285829	gene	ID=AT1G12580;Note=protein_coding_gene;Name=AT1G12580	+	TAIR10	1293
PE_000117	chr1	4285887	4285958	gene	ID=AT1G12590;Note=tRNA;Name=AT1G12590	-	TAIR10	71
PE_000117	chr1	4285887	4285958	tRNA	ID=AT1G12590.1;Parent=AT1G12590;Name=AT1G12590.1;Index=1	-	TAIR10	71
PE_000117	chr1	4286204	4288878	gene	ID=AT1G12600;Note=protein_coding_gene;Name=AT1G12600	-	TAIR10	1332
PE_000118	chr1	4303312	4305798	gene	ID=AT1G12640;Note=protein_coding_gene;Name=AT1G12640	-	TAIR10	949
PE_000119	chr1	4318309	4319090	gene	ID=AT1G12672;Note=protein_coding_gene;Name=AT1G12672	+	TAIR10	781
PE_000119	chr1	4319886	4322945	gene	ID=AT1G12680;Note=protein_coding_gene;Name=AT1G12680	-	TAIR10	1245
PE_000120	chr1	4359151	4361272	gene	ID=AT1G12790;Note=protein_coding_gene;Name=AT1G12790	-	TAIR10	1666
PE_000120	chr1	4355926	4358328	gene	ID=AT1G12780;Note=protein_coding_gene;Name=AT1G12780	-	TAIR10	511
PE_000121	chr1	4507221	4508528	gene	ID=AT1G13200;Note=protein_coding_gene;Name=AT1G13200	-	TAIR10	942
PE_000121	chr1	4508963	4513938	gene	ID=AT1G13210;Note=protein_coding_gene;Name=AT1G13210	-	TAIR10	1623
PE_000122	chr1	4561068	4563061	gene	ID=AT1G13310;Note=protein_coding_gene;Name=AT1G13310	-	TAIR10	1077
PE_000122	chr1	4563471	4567807	gene	ID=AT1G13320;Note=protein_coding_gene;Name=AT1G13320	-	TAIR10	1513
PE_000123	chr1	4601261	4603298	gene	ID=AT1G13410;Note=protein_coding_gene;Name=AT1G13410	+	TAIR10	1465
PE_000124	chr1	4633740	4635129	gene	ID=AT1G13530;Note=protein_coding_gene;Name=AT1G13530	-	TAIR10	1337
PE_000124	chr1	4635463	4636805	gene	ID=AT1G13540;Note=protein_coding_gene;Name=AT1G13540	-	TAIR10	1329
PE_000125	chr1	4724608	4726499	gene	ID=AT1G13780;Note=protein_coding_gene;Name=AT1G13780	+	TAIR10	1298
PE_000125	chr1	4727438	4730425	gene	ID=AT1G13790;Note=protein_coding_gene;Name=AT1G13790	+	TAIR10	763
PE_000126	chr1	4741999	4742071	gene	ID=AT1G13840;Note=tRNA;Name=AT1G13840	+	TAIR10	72
PE_000126	chr1	4741999	4742071	tRNA	ID=AT1G13840.1;Parent=AT1G13840;Name=AT1G13840.1;Index=1	+	TAIR10	72
PE_000126	chr1	4743095	4743167	gene	ID=AT1G13850;Note=tRNA;Name=AT1G13850	+	TAIR10	72
PE_000126	chr1	4743095	4743167	tRNA	ID=AT1G13850.1;Parent=AT1G13850;Name=AT1G13850.1;Index=1	+	TAIR10	72
PE_000126	chr1	4743205	4746956	gene	ID=AT1G13860;Note=protein_coding_gene;Name=AT1G13860	-	TAIR10	1321
PE_000127	chr1	4810488	4814543	gene	ID=AT1G14040;Note=protein_coding_gene;Name=AT1G14040	+	TAIR10	2863
PE_000128	chr1	4855533	4856930	gene	ID=AT1G14205;Note=protein_coding_gene;Name=AT1G14205	+	TAIR10	1061
PE_000128	chr1	4856778	4857964	gene	ID=AT1G14210;Note=protein_coding_gene;Name=AT1G14210	-	TAIR10	1186
PE_000128	chr1	4858642	4859601	gene	ID=AT1G14220;Note=protein_coding_gene;Name=AT1G14220	-	TAIR10	227
PE_000129	chr1	4868452	4871488	gene	ID=AT1G14250;Note=protein_coding_gene;Name=AT1G14250	+	TAIR10	217
PE_000129	chr1	4872856	4874907	gene	ID=AT1G14260;Note=protein_coding_gene;Name=AT1G14260	+	TAIR10	1415
PE_000129	chr1	4872080	4872219	transposable_element	ID=AT1TE15780;Name=AT1TE15780;Alias=HELITRONY1D	-	TAIR10	139
PE_000129	chr1	4872080	4872219	transposon_fragment	Parent=AT1TE15780	-	TAIR10	139
PE_000129	chr1	4872220	4872684	transposable_element	ID=AT1TE15785;Name=AT1TE15785;Alias=ATREP4	-	TAIR10	464
PE_000129	chr1	4872220	4872684	transposon_fragment	Parent=AT1TE15785	-	TAIR10	464
PE_000130	chr1	4983535	4987375	gene	ID=AT1G14570;Note=protein_coding_gene;Name=AT1G14570	+	TAIR10	1722
PE_000130	chr1	4987764	4987868	transposable_element	ID=AT1TE16150;Name=AT1TE16150;Alias=ATENSPM4	-	TAIR10	104
PE_000130	chr1	4987764	4987868	transposon_fragment	Parent=AT1TE16150	-	TAIR10	104
PE_000130	chr1	4987869	4988882	transposable_element	ID=AT1TE16155;Name=AT1TE16155;Alias=ATREP15	-	TAIR10	784
PE_000130	chr1	4987869	4988882	transposon_fragment	Parent=AT1TE16155	-	TAIR10	784
PE_000131	chr1	4983535	4987375	gene	ID=AT1G14570;Note=protein_coding_gene;Name=AT1G14570	+	TAIR10	1187
PE_000131	chr1	4987764	4987868	transposable_element	ID=AT1TE16150;Name=AT1TE16150;Alias=ATENSPM4	-	TAIR10	104
PE_000131	chr1	4987764	4987868	transposon_fragment	Parent=AT1TE16150	-	TAIR10	104
PE_000131	chr1	4987869	4988882	transposable_element	ID=AT1TE16155;Name=AT1TE16155;Alias=ATREP15	-	TAIR10	1013
PE_000131	chr1	4987869	4988882	transposon_fragment	Parent=AT1TE16155	-	TAIR10	1013
PE_000132	chr1	5031950	5036477	gene	ID=AT1G14660;Note=protein_coding_gene;Name=AT1G14660	-	TAIR10	2519
PE_000133	chr1	5037612	5040528	gene	ID=AT1G14670;Note=protein_coding_gene;Name=AT1G14670	+	TAIR10	1343
PE_000133	chr1	5040861	5041733	gene	ID=AT1G14680;Note=protein_coding_gene;Name=AT1G14680	+	TAIR10	872
PE_000134	chr1	5159199	5160083	gene	ID=AT1G14960;Note=protein_coding_gene;Name=AT1G14960	-	TAIR10	465
PE_000134	chr1	5161949	5164917	gene	ID=AT1G14970;Note=protein_coding_gene;Name=AT1G14970	-	TAIR10	669
PE_000135	chr1	5187626	5189673	gene	ID=AT1G15080;Note=protein_coding_gene;Name=AT1G15080	+	TAIR10	1366
PE_000135	chr1	5189687	5189760	gene	ID=AT1G15090;Note=tRNA;Name=AT1G15090	-	TAIR10	73
PE_000135	chr1	5189687	5189760	tRNA	ID=AT1G15090.1;Parent=AT1G15090;Name=AT1G15090.1;Index=1	-	TAIR10	73
PE_000136	chr1	5199018	5202175	gene	ID=AT1G15110;Note=protein_coding_gene;Name=AT1G15110	+	TAIR10	1859
PE_000136	chr1	5202648	5204193	gene	ID=AT1G15120;Note=protein_coding_gene;Name=AT1G15120	+	TAIR10	668
PE_000137	chr1	5228300	5231184	gene	ID=AT1G15200;Note=protein_coding_gene;Name=AT1G15200	-	TAIR10	777
PE_000137	chr1	5231348	5236573	gene	ID=AT1G15210;Note=protein_coding_gene;Name=AT1G15210	-	TAIR10	2059
PE_000138	chr1	5269019	5272058	gene	ID=AT1G15310;Note=protein_coding_gene;Name=AT1G15310	-	TAIR10	1380
PE_000138	chr1	5272256	5274074	gene	ID=AT1G15320;Note=protein_coding_gene;Name=AT1G15320	-	TAIR10	1422
PE_000139	chr1	5272256	5274074	gene	ID=AT1G15320;Note=protein_coding_gene;Name=AT1G15320	-	TAIR10	1304
PE_000139	chr1	5274346	5275602	gene	ID=AT1G15330;Note=protein_coding_gene;Name=AT1G15330	+	TAIR10	1256
PE_000139	chr1	5275677	5277689	gene	ID=AT1G15340;Note=protein_coding_gene;Name=AT1G15340	-	TAIR10	93
PE_000140	chr1	5315507	5317863	gene	ID=AT1G15470;Note=protein_coding_gene;Name=AT1G15470	+	TAIR10	1470
PE_000140	chr1	5318011	5320594	gene	ID=AT1G15480;Note=protein_coding_gene;Name=AT1G15480	+	TAIR10	1382
PE_000141	chr1	5381170	5385254	gene	ID=AT1G15660;Note=protein_coding_gene;Name=AT1G15660	+	TAIR10	1486
PE_000142	chr1	5410908	5414919	gene	ID=AT1G15740;Note=protein_coding_gene;Name=AT1G15740	+	TAIR10	1790
PE_000142	chr1	5414817	5421033	gene	ID=AT1G15750;Note=protein_coding_gene;Name=AT1G15750	-	TAIR10	1312
PE_000143	chr1	5410908	5414919	gene	ID=AT1G15740;Note=protein_coding_gene;Name=AT1G15740	+	TAIR10	1340
PE_000143	chr1	5414817	5421033	gene	ID=AT1G15750;Note=protein_coding_gene;Name=AT1G15750	-	TAIR10	1762
PE_000144	chr1	5410908	5414919	gene	ID=AT1G15740;Note=protein_coding_gene;Name=AT1G15740	+	TAIR10	1181
PE_000144	chr1	5414817	5421033	gene	ID=AT1G15750;Note=protein_coding_gene;Name=AT1G15750	-	TAIR10	1921
PE_000145	chr1	5425714	5426322	gene	ID=AT1G15760;Note=protein_coding_gene;Name=AT1G15760	+	TAIR10	608
PE_000145	chr1	5426892	5428280	gene	ID=AT1G15770;Note=protein_coding_gene;Name=AT1G15770	-	TAIR10	1160
PE_000146	chr1	5428520	5429561	gene	ID=AT1G15772;Note=protein_coding_gene;Name=AT1G15772	-	TAIR10	754
PE_000146	chr1	5430183	5436412	gene	ID=AT1G15780;Note=protein_coding_gene;Name=AT1G15780	-	TAIR10	1624
PE_000147	chr1	5514317	5516027	gene	ID=AT1G16080;Note=protein_coding_gene;Name=AT1G16080	+	TAIR10	114
PE_000147	chr1	5516259	5517822	gene	ID=AT1G16090;Note=protein_coding_gene;Name=AT1G16090	+	TAIR10	1563
PE_000147	chr1	5518062	5518134	gene	ID=AT1G16100;Note=tRNA;Name=AT1G16100	-	TAIR10	72
PE_000147	chr1	5518062	5518134	tRNA	ID=AT1G16100.1;Parent=AT1G16100;Name=AT1G16100.1;Index=1	-	TAIR10	72
PE_000147	chr1	5518373	5520891	gene	ID=AT1G16110;Note=protein_coding_gene;Name=AT1G16110	+	TAIR10	540
PE_000147	chr1	5518083	5518138	transposable_element	ID=AT1TE17830;Name=AT1TE17830;Alias=ATLINEIII	-	TAIR10	55
PE_000147	chr1	5518083	5518138	transposon_fragment	Parent=AT1TE17830	-	TAIR10	55
PE_000148	chr1	5522639	5524983	gene	ID=AT1G16120;Note=protein_coding_gene;Name=AT1G16120	+	TAIR10	1087
PE_000148	chr1	5525491	5528212	gene	ID=AT1G16130;Note=protein_coding_gene;Name=AT1G16130	+	TAIR10	1405
PE_000149	chr1	5528965	5531255	pseudogene	ID=AT1G16140;Note=pseudogene;Name=AT1G16140	+	TAIR10	584
PE_000149	chr1	5528965	5531255	pseudogenic_transcript	ID=AT1G16140.1;Parent=AT1G16140;Name=AT1G16140.1;Index=1	+	TAIR10	584
PE_000149	chr1	5530171	5531255	pseudogenic_exon	Parent=AT1G16140.1	+	TAIR10	584
PE_000149	chr1	5532415	5534877	gene	ID=AT1G16150;Note=protein_coding_gene;Name=AT1G16150	+	TAIR10	1256
PE_000149	chr1	5531243	5531284	transposable_element	ID=AT1TE17870;Name=AT1TE17870;Alias=ATREP1	+	TAIR10	41
PE_000149	chr1	5531243	5531284	transposon_fragment	Parent=AT1TE17870	+	TAIR10	41
PE_000149	chr1	5531285	5531953	transposable_element	ID=AT1TE17875;Name=AT1TE17875;Alias=ATREP2A	+	TAIR10	668
PE_000149	chr1	5531285	5531953	transposon_fragment	Parent=AT1TE17875	+	TAIR10	668
PE_000150	chr1	5570753	5573538	gene	ID=AT1G16290;Note=protein_coding_gene;Name=AT1G16290	-	TAIR10	907
PE_000150	chr1	5574310	5577622	gene	ID=AT1G16300;Note=protein_coding_gene;Name=AT1G16300	+	TAIR10	1321
PE_000151	chr1	5574310	5577622	gene	ID=AT1G16300;Note=protein_coding_gene;Name=AT1G16300	+	TAIR10	1140
PE_000151	chr1	5578431	5580693	gene	ID=AT1G16310;Note=protein_coding_gene;Name=AT1G16310	+	TAIR10	1051
PE_000152	chr1	5587790	5590651	gene	ID=AT1G16340;Note=protein_coding_gene;Name=AT1G16340	-	TAIR10	1284
PE_000152	chr1	5582387	5587391	gene	ID=AT1G16330;Note=protein_coding_gene;Name=AT1G16330	-	TAIR10	1317
PE_000153	chr1	5596694	5598447	gene	ID=AT1G16370;Note=protein_coding_gene;Name=AT1G16370	+	TAIR10	1753
PE_000153	chr1	5598453	5601367	gene	ID=AT1G16380;Note=protein_coding_gene;Name=AT1G16380	-	TAIR10	323
PE_000154	chr1	5665907	5668209	pseudogene	ID=AT1G16550;Note=pseudogene;Name=AT1G16550	+	TAIR10	1445
PE_000154	chr1	5665907	5668209	pseudogenic_transcript	ID=AT1G16550.1;Parent=AT1G16550;Name=AT1G16550.1;Index=1	+	TAIR10	1445
PE_000154	chr1	5665907	5668209	pseudogenic_exon	Parent=AT1G16550.1	+	TAIR10	1445
PE_000154	chr1	5668384	5670708	gene	ID=AT1G16560;Note=protein_coding_gene;Name=AT1G16560	+	TAIR10	1380
PE_000155	chr1	5709725	5711902	gene	ID=AT1G16700;Note=protein_coding_gene;Name=AT1G16700	+	TAIR10	1422
PE_000155	chr1	5712088	5713752	gene	ID=AT1G16705;Note=protein_coding_gene;Name=AT1G16705	+	TAIR10	1392
PE_000156	chr1	6050193	6052568	gene	ID=AT1G17590;Note=protein_coding_gene;Name=AT1G17590	-	TAIR10	990
PE_000156	chr1	6039303	6049556	gene	ID=AT1G17580;Note=protein_coding_gene;Name=AT1G17580	+	TAIR10	1373
PE_000157	chr1	6050193	6052568	gene	ID=AT1G17590;Note=protein_coding_gene;Name=AT1G17590	-	TAIR10	1850
PE_000157	chr1	6039303	6049556	gene	ID=AT1G17580;Note=protein_coding_gene;Name=AT1G17580	+	TAIR10	513
PE_000158	chr1	6276788	6278150	gene	ID=AT1G18250;Note=protein_coding_gene;Name=AT1G18250	-	TAIR10	1334
PE_000158	chr1	6278848	6282103	gene	ID=AT1G18260;Note=protein_coding_gene;Name=AT1G18260	-	TAIR10	968
PE_000159	chr1	6276788	6278150	gene	ID=AT1G18250;Note=protein_coding_gene;Name=AT1G18250	-	TAIR10	671
PE_000159	chr1	6278848	6282103	gene	ID=AT1G18260;Note=protein_coding_gene;Name=AT1G18260	-	TAIR10	1631
PE_000160	chr1	6309041	6311326	gene	ID=AT1G18335;Note=protein_coding_gene;Name=AT1G18335	-	TAIR10	636
PE_000160	chr1	6305966	6308013	gene	ID=AT1G18330;Note=protein_coding_gene;Name=AT1G18330	-	TAIR10	1336
PE_000161	chr1	6309041	6311326	gene	ID=AT1G18335;Note=protein_coding_gene;Name=AT1G18335	-	TAIR10	1381
PE_000161	chr1	6305966	6308013	gene	ID=AT1G18330;Note=protein_coding_gene;Name=AT1G18330	-	TAIR10	591
PE_000162	chr1	6309041	6311326	gene	ID=AT1G18335;Note=protein_coding_gene;Name=AT1G18335	-	TAIR10	1290
PE_000162	chr1	6311483	6313931	gene	ID=AT1G18340;Note=protein_coding_gene;Name=AT1G18340	-	TAIR10	1553
PE_000163	chr1	6352470	6356113	gene	ID=AT1G18460;Note=protein_coding_gene;Name=AT1G18460	+	TAIR10	1370
PE_000163	chr1	6356131	6360192	gene	ID=AT1G18470;Note=protein_coding_gene;Name=AT1G18470	-	TAIR10	1612
PE_000164	chr1	6466761	6469984	gene	ID=AT1G18750;Note=protein_coding_gene;Name=AT1G18750	+	TAIR10	1280
PE_000164	chr1	6470399	6470472	transposable_element	ID=AT1TE20980;Name=AT1TE20980;Alias=RathE1_cons	-	TAIR10	73
PE_000164	chr1	6470399	6470472	transposon_fragment	Parent=AT1TE20980	-	TAIR10	73
PE_000164	chr1	6471150	6471824	gene	ID=AT1G18760;Note=protein_coding_gene;Name=AT1G18760	-	TAIR10	554
PE_000165	chr1	6571184	6572937	transposable_element_gene	ID=AT1G19030;Note=transposable_element_gene;Name=AT1G19030;Derives_from=AT1TE21300	+	TAIR10	1753
PE_000165	chr1	6571873	6573214	transposable_element	ID=AT1TE21300;Name=AT1TE21300;Alias=ATLINE2	+	TAIR10	1115
PE_000165	chr1	6571873	6573214	transposon_fragment	Parent=AT1TE21300	+	TAIR10	1115
PE_000165	chr1	6568853	6570939	gene	ID=AT1G19025;Note=protein_coding_gene;Name=AT1G19025	+	TAIR10	951
PE_000166	chr1	6626822	6627530	gene	ID=AT1G19210;Note=protein_coding_gene;Name=AT1G19210	-	TAIR10	708
PE_000166	chr1	6628068	6633087	gene	ID=AT1G19220;Note=protein_coding_gene;Name=AT1G19220	-	TAIR10	1271
PE_000166	chr1	6626063	6626718	transposable_element	ID=AT1TE21470;Name=AT1TE21470;Alias=ATREP3	-	TAIR10	379
PE_000166	chr1	6626063	6626718	transposon_fragment	Parent=AT1TE21470	-	TAIR10	379
PE_000167	chr1	6669936	6670131	transposable_element	ID=AT1TE21600;Name=AT1TE21600;Alias=DT1	+	TAIR10	195
PE_000167	chr1	6669936	6670131	transposon_fragment	Parent=AT1TE21600	+	TAIR10	195
PE_000167	chr1	6666249	6668963	gene	ID=AT1G19290;Note=protein_coding_gene;Name=AT1G19290	+	TAIR10	830
PE_000168	chr1	6738484	6739734	gene	ID=AT1G19460;Note=protein_coding_gene;Name=AT1G19460	+	TAIR10	904
PE_000168	chr1	6740500	6740591	gene	ID=AT1G19464;Note=miRNA;Name=AT1G19464	+	TAIR10	91
PE_000168	chr1	6740500	6740591	miRNA	ID=AT1G19464.1;Parent=AT1G19464;Name=AT1G19464.1;Index=1	+	TAIR10	91
PE_000168	chr1	6741296	6742534	gene	ID=AT1G19470;Note=protein_coding_gene;Name=AT1G19470	+	TAIR10	534
PE_000169	chr1	6935218	6936693	gene	ID=AT1G19990;Note=protein_coding_gene;Name=AT1G19990	+	TAIR10	480
PE_000169	chr1	6936898	6937666	gene	ID=AT1G20000;Note=protein_coding_gene;Name=AT1G20000	-	TAIR10	768
PE_000169	chr1	6937795	6940582	gene	ID=AT1G20010;Note=protein_coding_gene;Name=AT1G20010	-	TAIR10	1418
PE_000170	chr1	6971485	6974835	gene	ID=AT1G20110;Note=protein_coding_gene;Name=AT1G20110	+	TAIR10	1490
PE_000170	chr1	6975388	6977264	gene	ID=AT1G20120;Note=protein_coding_gene;Name=AT1G20120	+	TAIR10	957
PE_000171	chr1	6998489	6999817	gene	ID=AT1G20190;Note=protein_coding_gene;Name=AT1G20190	-	TAIR10	300
PE_000171	chr1	7001201	7004418	gene	ID=AT1G20200;Note=protein_coding_gene;Name=AT1G20200	-	TAIR10	1316
PE_000172	chr1	7061665	7065178	gene	ID=AT1G20380;Note=protein_coding_gene;Name=AT1G20380	+	TAIR10	2292
PE_000172	chr1	7065494	7071561	transposable_element_gene	ID=AT1G20390;Note=transposable_element_gene;Name=AT1G20390	+	TAIR10	392
PE_000173	chr1	7061665	7065178	gene	ID=AT1G20380;Note=protein_coding_gene;Name=AT1G20380	+	TAIR10	2031
PE_000173	chr1	7065494	7071561	transposable_element_gene	ID=AT1G20390;Note=transposable_element_gene;Name=AT1G20390	+	TAIR10	653
PE_000174	chr1	7061665	7065178	gene	ID=AT1G20380;Note=protein_coding_gene;Name=AT1G20380	+	TAIR10	1384
PE_000174	chr1	7065494	7071561	transposable_element_gene	ID=AT1G20390;Note=transposable_element_gene;Name=AT1G20390	+	TAIR10	1300
PE_000174	chr1	7066493	7071562	transposable_element	ID=AT1TE22850;Name=AT1TE22850;Alias=ATLANTYS2	+	TAIR10	301
PE_000174	chr1	7066493	7067160	transposon_fragment	Parent=AT1TE22850	+	TAIR10	301
PE_000175	chr1	7146636	7149977	gene	ID=AT1G20630;Note=protein_coding_gene;Name=AT1G20630	+	TAIR10	1261
PE_000176	chr1	7161890	7163076	pseudogene	ID=AT1G20657;Note=pseudogene;Name=AT1G20657	-	TAIR10	814
PE_000176	chr1	7161890	7163076	pseudogenic_transcript	ID=AT1G20657.1;Parent=AT1G20657;Name=AT1G20657.1;Index=1	-	TAIR10	814
PE_000176	chr1	7161890	7163076	pseudogenic_exon	Parent=AT1G20657.1	-	TAIR10	814
PE_000176	chr1	7164190	7168021	gene	ID=AT1G20670;Note=protein_coding_gene;Name=AT1G20670	-	TAIR10	1072
PE_000176	chr1	7163108	7163343	transposable_element	ID=AT1TE23160;Name=AT1TE23160;Alias=ATCOPIA81	-	TAIR10	235
PE_000176	chr1	7163108	7163343	transposon_fragment	Parent=AT1TE23160	-	TAIR10	235
PE_000177	chr1	7161890	7163076	pseudogene	ID=AT1G20657;Note=pseudogene;Name=AT1G20657	-	TAIR10	273
PE_000177	chr1	7161890	7163076	pseudogenic_transcript	ID=AT1G20657.1;Parent=AT1G20657;Name=AT1G20657.1;Index=1	-	TAIR10	273
PE_000177	chr1	7161890	7163076	pseudogenic_exon	Parent=AT1G20657.1	-	TAIR10	273
PE_000177	chr1	7164190	7168021	gene	ID=AT1G20670;Note=protein_coding_gene;Name=AT1G20670	-	TAIR10	1613
PE_000177	chr1	7163108	7163343	transposable_element	ID=AT1TE23160;Name=AT1TE23160;Alias=ATCOPIA81	-	TAIR10	235
PE_000177	chr1	7163108	7163343	transposon_fragment	Parent=AT1TE23160	-	TAIR10	235
PE_000178	chr1	7194256	7195575	gene	ID=AT1G20730;Note=protein_coding_gene;Name=AT1G20730	+	TAIR10	213
PE_000178	chr1	7185658	7192794	gene	ID=AT1G20720;Note=protein_coding_gene;Name=AT1G20720	-	TAIR10	1325
PE_000179	chr1	7197491	7198681	gene	ID=AT1G20735;Note=protein_coding_gene;Name=AT1G20735	+	TAIR10	775
PE_000179	chr1	7200394	7201538	gene	ID=AT1G20740;Note=protein_coding_gene;Name=AT1G20740	+	TAIR10	512
PE_000180	chr1	7217128	7220784	gene	ID=AT1G20780;Note=protein_coding_gene;Name=AT1G20780	+	TAIR10	1159
PE_000180	chr1	7220961	7222268	gene	ID=AT1G20790;Note=protein_coding_gene;Name=AT1G20790	-	TAIR10	1307
PE_000181	chr1	7252174	7253731	gene	ID=AT1G20850;Note=protein_coding_gene;Name=AT1G20850	+	TAIR10	1170
PE_000182	chr1	7259102	7260775	gene	ID=AT1G20870;Note=protein_coding_gene;Name=AT1G20870	-	TAIR10	1350
PE_000182	chr1	7254007	7258677	gene	ID=AT1G20860;Note=protein_coding_gene;Name=AT1G20860	-	TAIR10	1225
PE_000183	chr1	7313946	7319574	gene	ID=AT1G20970;Note=protein_coding_gene;Name=AT1G20970	+	TAIR10	1546
PE_000184	chr1	7313946	7319574	gene	ID=AT1G20970;Note=protein_coding_gene;Name=AT1G20970	+	TAIR10	996
PE_000185	chr1	7462834	7466164	gene	ID=AT1G21320;Note=protein_coding_gene;Name=AT1G21320	-	TAIR10	2795
PE_000186	chr1	7497141	7499579	gene	ID=AT1G21410;Note=protein_coding_gene;Name=AT1G21410	+	TAIR10	127
PE_000186	chr1	7499733	7499804	gene	ID=AT1G21420;Note=tRNA;Name=AT1G21420	-	TAIR10	71
PE_000186	chr1	7499733	7499804	tRNA	ID=AT1G21420.1;Parent=AT1G21420;Name=AT1G21420.1;Index=1	-	TAIR10	71
PE_000186	chr1	7500845	7502186	gene	ID=AT1G21430;Note=protein_coding_gene;Name=AT1G21430	+	TAIR10	1341
PE_000186	chr1	7502159	7504175	gene	ID=AT1G21440;Note=protein_coding_gene;Name=AT1G21440	-	TAIR10	293
PE_000187	chr1	7592664	7604229	gene	ID=AT1G21650;Note=protein_coding_gene;Name=AT1G21650	-	TAIR10	3000
PE_000187	chr1	7600805	7604215	gene	ID=AT1G21651;Note=protein_coding_gene;Name=AT1G21651	-	TAIR10	1473
PE_000188	chr1	7754321	7757383	gene	ID=AT1G22020;Note=protein_coding_gene;Name=AT1G22020	+	TAIR10	1251
PE_000189	chr1	7828326	7830392	gene	ID=AT1G22180;Note=protein_coding_gene;Name=AT1G22180	-	TAIR10	1478
PE_000189	chr1	7830576	7830662	transposable_element	ID=AT1TE25180;Name=AT1TE25180;Alias=HELITRONY1E	-	TAIR10	86
PE_000189	chr1	7830576	7830662	transposon_fragment	Parent=AT1TE25180	-	TAIR10	86
PE_000189	chr1	7830663	7831066	transposable_element	ID=AT1TE25185;Name=AT1TE25185;Alias=HELITRONY3	+	TAIR10	403
PE_000189	chr1	7830663	7831066	transposon_fragment	Parent=AT1TE25185	+	TAIR10	403
PE_000189	chr1	7831067	7831925	transposable_element	ID=AT1TE25190;Name=AT1TE25190;Alias=HELITRON2	+	TAIR10	847
PE_000189	chr1	7831067	7831925	transposon_fragment	Parent=AT1TE25190	+	TAIR10	847
PE_000190	chr1	7867133	7872618	gene	ID=AT1G22275;Note=protein_coding_gene;Name=AT1G22275	+	TAIR10	1333
PE_000190	chr1	7873867	7875878	gene	ID=AT1G22280;Note=protein_coding_gene;Name=AT1G22280	+	TAIR10	418
PE_000191	chr1	7927428	7930657	gene	ID=AT1G22460;Note=protein_coding_gene;Name=AT1G22460	-	TAIR10	1521
PE_000192	chr1	7964042	7966436	gene	ID=AT1G22540;Note=protein_coding_gene;Name=AT1G22540	+	TAIR10	1493
PE_000192	chr1	7966533	7968641	gene	ID=AT1G22550;Note=protein_coding_gene;Name=AT1G22550	-	TAIR10	1410
PE_000193	chr1	8098767	8101351	gene	ID=AT1G22882;Note=protein_coding_gene;Name=AT1G22882	+	TAIR10	1695
PE_000193	chr1	8101565	8102375	gene	ID=AT1G22885;Note=protein_coding_gene;Name=AT1G22885	+	TAIR10	810
PE_000194	chr1	8196447	8198331	gene	ID=AT1G23110;Note=protein_coding_gene;Name=AT1G23110	-	TAIR10	1374
PE_000194	chr1	8198720	8199557	gene	ID=AT1G23120;Note=protein_coding_gene;Name=AT1G23120	+	TAIR10	837
PE_000195	chr1	8212556	8215807	gene	ID=AT1G23170;Note=protein_coding_gene;Name=AT1G23170	+	TAIR10	1389
PE_000195	chr1	8215721	8219584	gene	ID=AT1G23180;Note=protein_coding_gene;Name=AT1G23180	+	TAIR10	1697
PE_000196	chr1	8324698	8326697	gene	ID=AT1G23450;Note=protein_coding_gene;Name=AT1G23450	+	TAIR10	1337
PE_000196	chr1	8321680	8324240	gene	ID=AT1G23440;Note=protein_coding_gene;Name=AT1G23440	+	TAIR10	1205
PE_000197	chr1	8412051	8414879	gene	ID=AT1G23800;Note=protein_coding_gene;Name=AT1G23800	-	TAIR10	1448
PE_000198	chr1	8520834	8523121	gene	ID=AT1G24090;Note=protein_coding_gene;Name=AT1G24090	+	TAIR10	1481
PE_000198	chr1	8523247	8524929	gene	ID=AT1G24095;Note=protein_coding_gene;Name=AT1G24095	+	TAIR10	1393
PE_000199	chr1	8600465	8603801	gene	ID=AT1G24265;Note=protein_coding_gene;Name=AT1G24265	+	TAIR10	1371
PE_000200	chr1	8720309	8720721	gene	ID=AT1G24600;Note=protein_coding_gene;Name=AT1G24600	+	TAIR10	412
PE_000200	chr1	8720651	8722746	gene	ID=AT1G24610;Note=protein_coding_gene;Name=AT1G24610	-	TAIR10	809
PE_000201	chr1	8897755	8899102	gene	ID=AT1G25370;Note=protein_coding_gene;Name=AT1G25370	-	TAIR10	911
PE_000201	chr1	8894428	8896800	gene	ID=AT1G25360;Note=protein_coding_gene;Name=AT1G25360	+	TAIR10	1134
PE_000202	chr1	8948465	8950876	gene	ID=AT1G25480;Note=protein_coding_gene;Name=AT1G25480	+	TAIR10	2078
PE_000203	chr1	8951202	8955107	gene	ID=AT1G25490;Note=protein_coding_gene;Name=AT1G25490	+	TAIR10	1841
PE_000203	chr1	8955249	8957978	gene	ID=AT1G25500;Note=protein_coding_gene;Name=AT1G25500	-	TAIR10	1017
PE_000204	chr1	9057096	9061086	gene	ID=AT1G26190;Note=protein_coding_gene;Name=AT1G26190	-	TAIR10	3000
PE_000205	chr1	9105038	9107189	gene	ID=AT1G26320;Note=protein_coding_gene;Name=AT1G26320	+	TAIR10	1239
PE_000205	chr1	9107519	9113725	gene	ID=AT1G26330;Note=protein_coding_gene;Name=AT1G26330	+	TAIR10	1431
PE_000206	chr1	9143810	9143883	gene	ID=AT1G26430;Note=tRNA;Name=AT1G26430	+	TAIR10	73
PE_000206	chr1	9143810	9143883	tRNA	ID=AT1G26430.1;Parent=AT1G26430;Name=AT1G26430.1;Index=1	+	TAIR10	73
PE_000206	chr1	9143967	9146050	gene	ID=AT1G26440;Note=protein_coding_gene;Name=AT1G26440	-	TAIR10	1094
PE_000206	chr1	9141567	9143304	gene	ID=AT1G26420;Note=protein_coding_gene;Name=AT1G26420	-	TAIR10	1243
PE_000207	chr1	9189624	9190709	gene	ID=AT1G26590;Note=protein_coding_gene;Name=AT1G26590	+	TAIR10	856
PE_000207	chr1	9191607	9192401	gene	ID=AT1G26600;Note=protein_coding_gene;Name=AT1G26600	+	TAIR10	794
PE_000208	chr1	9295736	9298541	gene	ID=AT1G26830;Note=protein_coding_gene;Name=AT1G26830	+	TAIR10	1466
PE_000208	chr1	9298751	9300699	gene	ID=AT1G26840;Note=protein_coding_gene;Name=AT1G26840	+	TAIR10	1324
PE_000209	chr1	9298751	9300699	gene	ID=AT1G26840;Note=protein_coding_gene;Name=AT1G26840	+	TAIR10	1374
PE_000209	chr1	9300873	9304328	gene	ID=AT1G26850;Note=protein_coding_gene;Name=AT1G26850	-	TAIR10	1452
PE_000210	chr1	9343126	9345145	gene	ID=AT1G26940;Note=protein_coding_gene;Name=AT1G26940	+	TAIR10	1225
PE_000210	chr1	9346152	9346739	transposable_element	ID=AT1TE30115;Name=AT1TE30115;Alias=HELITRONY1D	-	TAIR10	587
PE_000210	chr1	9346152	9346739	transposon_fragment	Parent=AT1TE30115	-	TAIR10	587
PE_000211	chr1	9432418	9433190	gene	ID=AT1G27160;Note=protein_coding_gene;Name=AT1G27160	+	TAIR10	392
PE_000211	chr1	9433488	9439417	gene	ID=AT1G27170;Note=protein_coding_gene;Name=AT1G27170	+	TAIR10	2310
PE_000212	chr1	9439859	9446106	gene	ID=AT1G27180;Note=protein_coding_gene;Name=AT1G27180	+	TAIR10	1164
PE_000212	chr1	9446657	9448825	gene	ID=AT1G27190;Note=protein_coding_gene;Name=AT1G27190	-	TAIR10	1285
PE_000213	chr1	9566332	9567906	gene	ID=AT1G27540;Note=protein_coding_gene;Name=AT1G27540	-	TAIR10	1148
PE_000213	chr1	9565351	9565923	transposable_element	ID=AT1TE30820;Name=AT1TE30820;Alias=HELITRONY1C	-	TAIR10	572
PE_000213	chr1	9565351	9565923	transposon_fragment	Parent=AT1TE30820	-	TAIR10	572
PE_000214	chr1	9570855	9571987	pseudogene	ID=AT1G27560;Note=pseudogene;Name=AT1G27560	-	TAIR10	1132
PE_000214	chr1	9570855	9571987	pseudogenic_transcript	ID=AT1G27560.1;Parent=AT1G27560;Name=AT1G27560.1;Index=1	-	TAIR10	1132
PE_000214	chr1	9570855	9571987	pseudogenic_exon	Parent=AT1G27560.1	-	TAIR10	1132
PE_000214	chr1	9572801	9574191	transposable_element	ID=AT1TE30840;Name=AT1TE30840;Alias=ATREP15	-	TAIR10	765
PE_000214	chr1	9572801	9574191	transposon_fragment	Parent=AT1TE30840	-	TAIR10	765
PE_000215	chr1	9668584	9671616	gene	ID=AT1G27760;Note=protein_coding_gene;Name=AT1G27760	+	TAIR10	1578
PE_000215	chr1	9671638	9676157	gene	ID=AT1G27770;Note=protein_coding_gene;Name=AT1G27770	-	TAIR10	1400
PE_000216	chr1	9668584	9671616	gene	ID=AT1G27760;Note=protein_coding_gene;Name=AT1G27760	+	TAIR10	1162
PE_000216	chr1	9671638	9676157	gene	ID=AT1G27770;Note=protein_coding_gene;Name=AT1G27770	-	TAIR10	1816
PE_000217	chr1	9671638	9676157	gene	ID=AT1G27770;Note=protein_coding_gene;Name=AT1G27770	-	TAIR10	3000
PE_000218	chr1	9708924	9714089	gene	ID=AT1G27880;Note=protein_coding_gene;Name=AT1G27880	+	TAIR10	334
PE_000218	chr1	9714136	9715044	gene	ID=AT1G27890;Note=protein_coding_gene;Name=AT1G27890	-	TAIR10	908
PE_000218	chr1	9715453	9720568	gene	ID=AT1G27900;Note=protein_coding_gene;Name=AT1G27900	-	TAIR10	1302
PE_000219	chr1	9963593	9966320	gene	ID=AT1G28380;Note=protein_coding_gene;Name=AT1G28380	+	TAIR10	1158
PE_000219	chr1	9966186	9968301	gene	ID=AT1G28390;Note=protein_coding_gene;Name=AT1G28390	-	TAIR10	1976
PE_000220	chr1	10264395	10266818	gene	ID=AT1G29340;Note=protein_coding_gene;Name=AT1G29340	+	TAIR10	1080
PE_000220	chr1	10268469	10273788	gene	ID=AT1G29350;Note=protein_coding_gene;Name=AT1G29350	-	TAIR10	269
PE_000221	chr1	10264395	10266818	gene	ID=AT1G29340;Note=protein_coding_gene;Name=AT1G29340	+	TAIR10	567
PE_000221	chr1	10268469	10273788	gene	ID=AT1G29350;Note=protein_coding_gene;Name=AT1G29350	-	TAIR10	782
PE_000222	chr1	10268469	10273788	gene	ID=AT1G29350;Note=protein_coding_gene;Name=AT1G29350	-	TAIR10	1372
PE_000223	chr1	10437657	10440786	gene	ID=AT1G29820;Note=protein_coding_gene;Name=AT1G29820	+	TAIR10	1329
PE_000223	chr1	10435374	10437506	gene	ID=AT1G29810;Note=protein_coding_gene;Name=AT1G29810	-	TAIR10	1520
PE_000224	chr1	10454482	10455785	gene	ID=AT1G29860;Note=protein_coding_gene;Name=AT1G29860	+	TAIR10	835
PE_000224	chr1	10456902	10458782	gene	ID=AT1G29870;Note=protein_coding_gene;Name=AT1G29870	-	TAIR10	1048
PE_000224	chr1	10456764	10456841	transposable_element	ID=AT1TE33790;Name=AT1TE33790;Alias=VANDAL20	-	TAIR10	77
PE_000224	chr1	10456764	10456841	transposon_fragment	Parent=AT1TE33790	-	TAIR10	77
PE_000225	chr1	10513194	10516385	gene	ID=AT1G30010;Note=protein_coding_gene;Name=AT1G30010	+	TAIR10	1240
PE_000225	chr1	10515874	10516347	gene	ID=AT1G30020;Note=protein_coding_gene;Name=AT1G30020	-	TAIR10	473
PE_000225	chr1	10516927	10517405	transposable_element	ID=AT1TE33990;Name=AT1TE33990;Alias=ATREP15	-	TAIR10	478
PE_000225	chr1	10516927	10517405	transposon_fragment	Parent=AT1TE33990	-	TAIR10	478
PE_000226	chr1	10680246	10682954	gene	ID=AT1G30320;Note=protein_coding_gene;Name=AT1G30320	+	TAIR10	1259
PE_000227	chr1	10748816	10756316	gene	ID=AT1G30420;Note=protein_coding_gene;Name=AT1G30420	+	TAIR10	1026
PE_000227	chr1	10756722	10756794	gene	ID=AT1G30430;Note=tRNA;Name=AT1G30430	+	TAIR10	72
PE_000227	chr1	10756722	10756794	tRNA	ID=AT1G30430.1;Parent=AT1G30430;Name=AT1G30430.1;Index=1	+	TAIR10	72
PE_000228	chr1	10790022	10792575	gene	ID=AT1G30480;Note=protein_coding_gene;Name=AT1G30480	+	TAIR10	1410
PE_000229	chr1	10804450	10806319	gene	ID=AT1G30500;Note=protein_coding_gene;Name=AT1G30500	-	TAIR10	1172
PE_000229	chr1	10806985	10809188	gene	ID=AT1G30510;Note=protein_coding_gene;Name=AT1G30510	-	TAIR10	1162
PE_000230	chr1	10819554	10823659	gene	ID=AT1G30550;Note=protein_coding_gene;Name=AT1G30550	-	TAIR10	1118
PE_000230	chr1	10824761	10826293	gene	ID=AT1G30560;Note=protein_coding_gene;Name=AT1G30560	+	TAIR10	780
PE_000231	chr1	10824761	10826293	gene	ID=AT1G30560;Note=protein_coding_gene;Name=AT1G30560	+	TAIR10	670
PE_000231	chr1	10827329	10827972	transposable_element	ID=AT1TE34980;Name=AT1TE34980;Alias=ATREP1	-	TAIR10	643
PE_000231	chr1	10827329	10827972	transposon_fragment	Parent=AT1TE34980	-	TAIR10	643
PE_000231	chr1	10827973	10828153	transposable_element	ID=AT1TE34985;Name=AT1TE34985;Alias=ATREP10D	-	TAIR10	180
PE_000231	chr1	10827973	10828153	transposon_fragment	Parent=AT1TE34985	-	TAIR10	180
PE_000232	chr1	10846513	10850628	gene	ID=AT1G30610;Note=protein_coding_gene;Name=AT1G30610	+	TAIR10	1256
PE_000232	chr1	10851266	10851466	transposable_element	ID=AT1TE35050;Name=AT1TE35050;Alias=ATTIRTA1	-	TAIR10	200
PE_000232	chr1	10851266	10851466	transposon_fragment	Parent=AT1TE35050	-	TAIR10	200
PE_000232	chr1	10852075	10852625	transposable_element	ID=AT1TE35055;Name=AT1TE35055;Alias=ATREP3	-	TAIR10	297
PE_000232	chr1	10852075	10852625	transposon_fragment	Parent=AT1TE35055	-	TAIR10	297
PE_000233	chr1	10875049	10876201	transposable_element	ID=AT1TE35130;Name=AT1TE35130;Alias=HELITRONY1E	-	TAIR10	1091
PE_000233	chr1	10875049	10876201	transposon_fragment	Parent=AT1TE35130	-	TAIR10	1091
PE_000233	chr1	10876853	10879017	gene	ID=AT1G30660;Note=protein_coding_gene;Name=AT1G30660	+	TAIR10	1257
PE_000234	chr1	10887607	10890332	gene	ID=AT1G30690;Note=protein_coding_gene;Name=AT1G30690	+	TAIR10	1611
PE_000235	chr1	10887607	10890332	gene	ID=AT1G30690;Note=protein_coding_gene;Name=AT1G30690	+	TAIR10	1118
PE_000236	chr1	10887607	10890332	gene	ID=AT1G30690;Note=protein_coding_gene;Name=AT1G30690	+	TAIR10	886
PE_000237	chr1	11144772	11146930	gene	ID=AT1G31190;Note=protein_coding_gene;Name=AT1G31190	+	TAIR10	1097
PE_000237	chr1	11146923	11147678	gene	ID=AT1G31200;Note=protein_coding_gene;Name=AT1G31200	-	TAIR10	755
PE_000237	chr1	11148254	11152501	transposable_element_gene	ID=AT1G31210;Note=transposable_element_gene;Name=AT1G31210;Derives_from=AT1TE36035	-	TAIR10	579
PE_000237	chr1	11148275	11148307	transposable_element	ID=AT1TE36030;Name=AT1TE36030;Alias=ATCOPIA25	-	TAIR10	32
PE_000237	chr1	11148275	11148307	transposon_fragment	Parent=AT1TE36030	-	TAIR10	32
PE_000237	chr1	11148308	11152649	transposable_element	ID=AT1TE36035;Name=AT1TE36035;Alias=ATCOPIA51	-	TAIR10	525
PE_000237	chr1	11148308	11152649	transposon_fragment	Parent=AT1TE36035	-	TAIR10	525
PE_000238	chr1	11181711	11185344	gene	ID=AT1G31280;Note=protein_coding_gene;Name=AT1G31280	+	TAIR10	1299
PE_000239	chr1	11188293	11192317	gene	ID=AT1G31290;Note=protein_coding_gene;Name=AT1G31290	+	TAIR10	3000
PE_000240	chr1	11372425	11373483	gene	ID=AT1G31760;Note=protein_coding_gene;Name=AT1G31760	-	TAIR10	852
PE_000240	chr1	11374893	11377794	gene	ID=AT1G31770;Note=protein_coding_gene;Name=AT1G31770	-	TAIR10	738
PE_000241	chr1	11374893	11377794	gene	ID=AT1G31770;Note=protein_coding_gene;Name=AT1G31770	-	TAIR10	1431
PE_000241	chr1	11378940	11379414	gene	ID=AT1G31772;Note=protein_coding_gene;Name=AT1G31772	+	TAIR10	423
PE_000242	chr1	11423906	11426714	gene	ID=AT1G31840;Note=protein_coding_gene;Name=AT1G31840	+	TAIR10	1192
PE_000242	chr1	11427625	11427690	transposable_element	ID=AT1TE36955;Name=AT1TE36955;Alias=HELITRONY3	-	TAIR10	65
PE_000242	chr1	11427625	11427690	transposon_fragment	Parent=AT1TE36955	-	TAIR10	65
PE_000242	chr1	11427691	11428401	transposable_element	ID=AT1TE36960;Name=AT1TE36960;Alias=HELITRONY3	-	TAIR10	710
PE_000242	chr1	11427691	11427788	transposon_fragment	Parent=AT1TE36960	-	TAIR10	97
PE_000242	chr1	11427777	11428401	transposon_fragment	Parent=AT1TE36960	-	TAIR10	624
PE_000243	chr1	11423906	11426714	gene	ID=AT1G31840;Note=protein_coding_gene;Name=AT1G31840	+	TAIR10	695
PE_000243	chr1	11427625	11427690	transposable_element	ID=AT1TE36955;Name=AT1TE36955;Alias=HELITRONY3	-	TAIR10	65
PE_000243	chr1	11427625	11427690	transposon_fragment	Parent=AT1TE36955	-	TAIR10	65
PE_000243	chr1	11427691	11428401	transposable_element	ID=AT1TE36960;Name=AT1TE36960;Alias=HELITRONY3	-	TAIR10	710
PE_000243	chr1	11427691	11427788	transposon_fragment	Parent=AT1TE36960	-	TAIR10	97
PE_000243	chr1	11427777	11428401	transposon_fragment	Parent=AT1TE36960	-	TAIR10	624
PE_000244	chr1	11479866	11482890	gene	ID=AT1G31970;Note=protein_coding_gene;Name=AT1G31970	+	TAIR10	1662
PE_000245	chr1	11601781	11605060	gene	ID=AT1G32200;Note=protein_coding_gene;Name=AT1G32200	-	TAIR10	1051
PE_000246	chr1	11612118	11616218	gene	ID=AT1G32230;Note=protein_coding_gene;Name=AT1G32230	+	TAIR10	1800
PE_000247	chr1	11612118	11616218	gene	ID=AT1G32230;Note=protein_coding_gene;Name=AT1G32230	+	TAIR10	1620
PE_000247	chr1	11617477	11617533	transposable_element	ID=AT1TE37600;Name=AT1TE37600;Alias=ATREP15	-	TAIR10	56
PE_000247	chr1	11617477	11617533	transposon_fragment	Parent=AT1TE37600	-	TAIR10	56
PE_000247	chr1	11617534	11617702	transposable_element	ID=AT1TE37605;Name=AT1TE37605;Alias=ATREP15	+	TAIR10	64
PE_000247	chr1	11617534	11617702	transposon_fragment	Parent=AT1TE37605	+	TAIR10	64
PE_000248	chr1	11612118	11616218	gene	ID=AT1G32230;Note=protein_coding_gene;Name=AT1G32230	+	TAIR10	1318
PE_000248	chr1	11617477	11617533	transposable_element	ID=AT1TE37600;Name=AT1TE37600;Alias=ATREP15	-	TAIR10	56
PE_000248	chr1	11617477	11617533	transposon_fragment	Parent=AT1TE37600	-	TAIR10	56
PE_000248	chr1	11617534	11617702	transposable_element	ID=AT1TE37605;Name=AT1TE37605;Alias=ATREP15	+	TAIR10	168
PE_000248	chr1	11617534	11617702	transposon_fragment	Parent=AT1TE37605	+	TAIR10	168
PE_000248	chr1	11617703	11619060	transposable_element	ID=AT1TE37610;Name=AT1TE37610;Alias=HELITRONY3	+	TAIR10	197
PE_000248	chr1	11617703	11619060	transposon_fragment	Parent=AT1TE37610	+	TAIR10	197
PE_000249	chr1	11695611	11697896	gene	ID=AT1G32415;Note=protein_coding_gene;Name=AT1G32415	+	TAIR10	487
PE_000249	chr1	11698914	11699257	transposable_element	ID=AT1TE37885;Name=AT1TE37885;Alias=ATREP3	-	TAIR10	343
PE_000249	chr1	11698914	11699257	transposon_fragment	Parent=AT1TE37885	-	TAIR10	343
PE_000249	chr1	11699258	11701926	transposable_element	ID=AT1TE37890;Name=AT1TE37890;Alias=ATREP3	+	TAIR10	1151
PE_000249	chr1	11699258	11701926	transposon_fragment	Parent=AT1TE37890	+	TAIR10	1151
PE_000250	chr1	11840910	11843257	gene	ID=AT1G32730;Note=protein_coding_gene;Name=AT1G32730	+	TAIR10	1362
PE_000250	chr1	11844877	11846347	gene	ID=AT1G32740;Note=protein_coding_gene;Name=AT1G32740	+	TAIR10	18
PE_000251	chr1	11979511	11979620	transposable_element	ID=AT1TE38770;Name=AT1TE38770;Alias=HELITRONY3	+	TAIR10	109
PE_000251	chr1	11979511	11979620	transposon_fragment	Parent=AT1TE38770	+	TAIR10	109
PE_000251	chr1	11979621	11982674	transposable_element	ID=AT1TE38775;Name=AT1TE38775;Alias=ATREP4	+	TAIR10	768
PE_000251	chr1	11979621	11982674	transposon_fragment	Parent=AT1TE38775	+	TAIR10	768
PE_000251	chr1	11975340	11978521	gene	ID=AT1G33060;Note=protein_coding_gene;Name=AT1G33060	-	TAIR10	1132
PE_000252	chr1	12201963	12203408	gene	ID=AT1G33670;Note=protein_coding_gene;Name=AT1G33670	+	TAIR10	393
PE_000253	chr1	12417176	12421523	gene	ID=AT1G34110;Note=protein_coding_gene;Name=AT1G34110	-	TAIR10	1955
PE_000254	chr1	12433356	12434735	gene	ID=AT1G34140;Note=protein_coding_gene;Name=AT1G34140	-	TAIR10	442
PE_000254	chr1	12435954	12439499	gene	ID=AT1G34150;Note=protein_coding_gene;Name=AT1G34150	+	TAIR10	1339
PE_000255	chr1	13088090	13089696	transposable_element	ID=AT1TE42755;Name=AT1TE42755;Alias=HELITRONY3	+	TAIR10	1384
PE_000255	chr1	13088090	13089696	transposon_fragment	Parent=AT1TE42755	+	TAIR10	1384
PE_000255	chr1	13089697	13089743	transposable_element	ID=AT1TE42760;Name=AT1TE42760;Alias=ATREP15	-	TAIR10	46
PE_000255	chr1	13089697	13089743	transposon_fragment	Parent=AT1TE42760	-	TAIR10	46
PE_000255	chr1	13089744	13089824	transposable_element	ID=AT1TE42765;Name=AT1TE42765;Alias=ARNOLDY2	-	TAIR10	80
PE_000255	chr1	13089744	13089824	transposon_fragment	Parent=AT1TE42765	-	TAIR10	80
PE_000255	chr1	13089869	13097078	gene	ID=AT1G35530;Note=protein_coding_gene;Name=AT1G35530	+	TAIR10	1443
PE_000256	chr1	13533411	13544009	gene	ID=AT1G36160;Note=protein_coding_gene;Name=AT1G36160	+	TAIR10	1597
PE_000256	chr1	13544555	13544699	transposable_element	ID=AT1TE44330;Name=AT1TE44330;Alias=VANDAL16	-	TAIR10	144
PE_000256	chr1	13544555	13544699	transposon_fragment	Parent=AT1TE44330	-	TAIR10	144
PE_000257	chr1	13560124	13564586	transposable_element_gene	ID=AT1G36185;Note=transposable_element_gene;Name=AT1G36185;Derives_from=AT1TE44380	+	TAIR10	905
PE_000257	chr1	13559846	13564825	transposable_element	ID=AT1TE44380;Name=AT1TE44380;Alias=ATCOPIA89	+	TAIR10	1183
PE_000257	chr1	13559846	13564825	transposon_fragment	Parent=AT1TE44380	+	TAIR10	1183
PE_000257	chr1	13545965	13558492	gene	ID=AT1G36180;Note=protein_coding_gene;Name=AT1G36180	+	TAIR10	463
PE_000258	chr1	14025028	14026941	gene	ID=AT1G36980;Note=protein_coding_gene;Name=AT1G36980	+	TAIR10	1269
PE_000258	chr1	14027292	14030500	gene	ID=AT1G36990;Note=protein_coding_gene;Name=AT1G36990	-	TAIR10	1380
PE_000258	chr1	14027020	14027168	transposable_element	ID=AT1TE46075;Name=AT1TE46075;Alias=ATHAT1	+	TAIR10	148
PE_000258	chr1	14027020	14027168	transposon_fragment	Parent=AT1TE46075	+	TAIR10	148
PE_000259	chr1	15895285	15900055	gene	ID=AT1G42440;Note=protein_coding_gene;Name=AT1G42440	-	TAIR10	1440
PE_000259	chr1	15891371	15894444	gene	ID=AT1G42430;Note=protein_coding_gene;Name=AT1G42430	+	TAIR10	719
PE_000260	chr1	16424578	16425345	gene	ID=AT1G43610;Note=protein_coding_gene;Name=AT1G43610	+	TAIR10	767
PE_000260	chr1	16425412	16430200	gene	ID=AT1G43620;Note=protein_coding_gene;Name=AT1G43620	-	TAIR10	439
PE_000260	chr1	16421133	16424144	transposable_element	ID=AT1TE54120;Name=AT1TE54120;Alias=HELITRONY1B	-	TAIR10	1293
PE_000260	chr1	16423515	16424144	transposon_fragment	Parent=AT1TE54120	-	TAIR10	629
PE_000260	chr1	16422982	16423164	transposable_element	ID=AT1TE54130;Name=AT1TE54130;Alias=ATREP3	-	TAIR10	182
PE_000260	chr1	16422982	16423164	transposon_fragment	Parent=AT1TE54130	-	TAIR10	182
PE_000260	chr1	16423165	16423514	transposable_element	ID=AT1TE54135;Name=AT1TE54135;Alias=HELITRONY1B	-	TAIR10	349
PE_000260	chr1	16423165	16423514	transposon_fragment	Parent=AT1TE54135	-	TAIR10	349
PE_000260	chr1	16424157	16424191	transposable_element	ID=AT1TE54140;Name=AT1TE54140;Alias=HELITRONY3	+	TAIR10	34
PE_000260	chr1	16424157	16424191	transposon_fragment	Parent=AT1TE54140	+	TAIR10	34
PE_000260	chr1	16424192	16424295	transposable_element	ID=AT1TE54145;Name=AT1TE54145;Alias=ATREP3	+	TAIR10	103
PE_000260	chr1	16424192	16424295	transposon_fragment	Parent=AT1TE54145	+	TAIR10	103
PE_000261	chr1	16425412	16430200	gene	ID=AT1G43620;Note=protein_coding_gene;Name=AT1G43620	-	TAIR10	1412
PE_000261	chr1	16430418	16430658	transposable_element	ID=AT1TE54160;Name=AT1TE54160;Alias=ATHATN2	-	TAIR10	240
PE_000261	chr1	16430418	16430658	transposon_fragment	Parent=AT1TE54160	-	TAIR10	240
PE_000261	chr1	16431065	16431612	transposable_element	ID=AT1TE54165;Name=AT1TE54165;Alias=ATDNA12T3_2	-	TAIR10	547
PE_000261	chr1	16431550	16431612	transposon_fragment	Parent=AT1TE54165	-	TAIR10	62
PE_000261	chr1	16431065	16431128	transposon_fragment	Parent=AT1TE54165	-	TAIR10	63
PE_000262	chr1	16617129	16622049	gene	ID=AT1G43850;Note=protein_coding_gene;Name=AT1G43850	+	TAIR10	1586
PE_000262	chr1	16622068	16624469	gene	ID=AT1G43860;Note=protein_coding_gene;Name=AT1G43860	-	TAIR10	1395
PE_000262	chr1	16620651	16620830	transposable_element	ID=AT1TE54780;Name=AT1TE54780;Alias=ATCOPIA80	+	TAIR10	179
PE_000262	chr1	16620651	16620830	transposon_fragment	Parent=AT1TE54780	+	TAIR10	179
PE_000263	chr1	16969364	16969724	transposable_element	ID=AT1TE56185;Name=AT1TE56185;Alias=ATMUNX1	-	TAIR10	360
PE_000263	chr1	16969364	16969724	transposon_fragment	Parent=AT1TE56185	-	TAIR10	360
PE_000263	chr1	16970214	16974641	gene	ID=AT1G44900;Note=protein_coding_gene;Name=AT1G44900	+	TAIR10	1455
PE_000264	chr1	16975604	16982965	gene	ID=AT1G44910;Note=protein_coding_gene;Name=AT1G44910	+	TAIR10	3000
PE_000265	chr1	17162963	17164779	gene	ID=AT1G45248;Note=protein_coding_gene;Name=AT1G45248	-	TAIR10	1346
PE_000265	chr1	17165127	17167907	gene	ID=AT1G45249;Note=protein_coding_gene;Name=AT1G45249	-	TAIR10	1306
PE_000266	chr1	17232135	17232935	gene	ID=AT1G46408;Note=protein_coding_gene;Name=AT1G46408	-	TAIR10	800
PE_000267	chr1	17232135	17232935	gene	ID=AT1G46408;Note=protein_coding_gene;Name=AT1G46408	-	TAIR10	800
PE_000268	chr1	17466751	17473294	gene	ID=AT1G47560;Note=protein_coding_gene;Name=AT1G47560	+	TAIR10	1282
PE_000268	chr1	17473922	17476333	transposable_element_gene	ID=AT1G47565;Note=transposable_element_gene;Name=AT1G47565	+	TAIR10	1090
PE_000268	chr1	17473770	17474223	transposable_element	ID=AT1TE57910;Name=AT1TE57910;Alias=ATGP3	+	TAIR10	453
PE_000268	chr1	17473770	17474223	transposon_fragment	Parent=AT1TE57910	+	TAIR10	453
PE_000268	chr1	17474228	17475214	transposable_element	ID=AT1TE57915;Name=AT1TE57915;Alias=ATGP9B	+	TAIR10	784
PE_000268	chr1	17474228	17475214	transposon_fragment	Parent=AT1TE57915	+	TAIR10	784
PE_000269	chr1	17723452	17727043	gene	ID=AT1G48050;Note=protein_coding_gene;Name=AT1G48050	+	TAIR10	1656
PE_000269	chr1	17726982	17727054	transposable_element	ID=AT1TE58870;Name=AT1TE58870;Alias=ATREP10D	+	TAIR10	72
PE_000269	chr1	17726982	17727054	transposon_fragment	Parent=AT1TE58870	+	TAIR10	72
PE_000269	chr1	17727055	17727204	transposable_element	ID=AT1TE58875;Name=AT1TE58875;Alias=RP1_AT	+	TAIR10	149
PE_000269	chr1	17727055	17727204	transposon_fragment	Parent=AT1TE58875	+	TAIR10	149
PE_000269	chr1	17728295	17729448	gene	ID=AT1G48060;Note=protein_coding_gene;Name=AT1G48060	+	TAIR10	92
PE_000269	chr1	17727997	17728177	transposable_element	ID=AT1TE58885;Name=AT1TE58885;Alias=HELITRONY1E	+	TAIR10	180
PE_000269	chr1	17727997	17728177	transposon_fragment	Parent=AT1TE58885	+	TAIR10	180
PE_000269	chr1	17727205	17727996	transposable_element	ID=AT1TE58880;Name=AT1TE58880;Alias=ATHPOGON3	+	TAIR10	791
PE_000269	chr1	17727205	17727996	transposon_fragment	Parent=AT1TE58880	+	TAIR10	791
PE_000270	chr1	17730417	17731122	gene	ID=AT1G48070;Note=protein_coding_gene;Name=AT1G48070	-	TAIR10	705
PE_000270	chr1	17731841	17731913	gene	ID=AT1G48080;Note=tRNA;Name=AT1G48080	+	TAIR10	72
PE_000270	chr1	17731841	17731913	tRNA	ID=AT1G48080.1;Parent=AT1G48080;Name=AT1G48080.1;Index=1	+	TAIR10	72
PE_000270	chr1	17731841	17731892	transposable_element	ID=AT1TE58895;Name=AT1TE58895;Alias=ATLINEIII	+	TAIR10	51
PE_000270	chr1	17731841	17731892	transposon_fragment	Parent=AT1TE58895	+	TAIR10	51
PE_000270	chr1	17732010	17758444	gene	ID=AT1G48090;Note=protein_coding_gene;Name=AT1G48090	-	TAIR10	1362
PE_000271	chr1	17805761	17808885	gene	ID=AT1G48230;Note=protein_coding_gene;Name=AT1G48230	+	TAIR10	1577
PE_000271	chr1	17809007	17811895	gene	ID=AT1G48240;Note=protein_coding_gene;Name=AT1G48240	-	TAIR10	1301
PE_000272	chr1	17868650	17873032	gene	ID=AT1G48360;Note=protein_coding_gene;Name=AT1G48360	+	TAIR10	1380
PE_000272	chr1	17873230	17873851	transposable_element	ID=AT1TE59310;Name=AT1TE59310;Alias=ATREP15	+	TAIR10	621
PE_000272	chr1	17873230	17873851	transposon_fragment	Parent=AT1TE59310	+	TAIR10	621
PE_000272	chr1	17873852	17873885	transposable_element	ID=AT1TE59315;Name=AT1TE59315;Alias=ATLINE1_1	+	TAIR10	33
PE_000272	chr1	17873852	17873885	transposon_fragment	Parent=AT1TE59315	+	TAIR10	33
PE_000272	chr1	17873886	17874352	transposable_element	ID=AT1TE59320;Name=AT1TE59320;Alias=ATLINE2	+	TAIR10	466
PE_000272	chr1	17873886	17874352	transposon_fragment	Parent=AT1TE59320	+	TAIR10	466
PE_000272	chr1	17874512	17877397	gene	ID=AT1G48370;Note=protein_coding_gene;Name=AT1G48370	+	TAIR10	140
PE_000273	chr1	18023387	18026065	gene	ID=AT1G48740;Note=protein_coding_gene;Name=AT1G48740	-	TAIR10	1434
PE_000273	chr1	18026838	18027009	gene	ID=AT1G48742;Note=miRNA;Name=AT1G48742	-	TAIR10	171
PE_000273	chr1	18026838	18027009	miRNA	ID=AT1G48742.1;Parent=AT1G48742;Name=AT1G48742.1;Index=1	-	TAIR10	171
PE_000274	chr1	18035967	18036510	gene	ID=AT1G48750;Note=protein_coding_gene;Name=AT1G48750	+	TAIR10	543
PE_000274	chr1	18034530	18035503	transposable_element	ID=AT1TE59805;Name=AT1TE59805;Alias=HELITRONY1D	-	TAIR10	643
PE_000274	chr1	18034530	18035503	transposon_fragment	Parent=AT1TE59805	-	TAIR10	643
PE_000274	chr1	18035967	18039405	gene	ID=AT1G48760;Note=protein_coding_gene;Name=AT1G48760	-	TAIR10	1893
PE_000275	chr1	18215872	18218313	gene	ID=AT1G49240;Note=protein_coding_gene;Name=AT1G49240	+	TAIR10	1651
PE_000275	chr1	18218750	18219261	gene	ID=AT1G49245;Note=protein_coding_gene;Name=AT1G49245	+	TAIR10	511
PE_000276	chr1	18215872	18218313	gene	ID=AT1G49240;Note=protein_coding_gene;Name=AT1G49240	+	TAIR10	1044
PE_000276	chr1	18218750	18219261	gene	ID=AT1G49245;Note=protein_coding_gene;Name=AT1G49245	+	TAIR10	511
PE_000277	chr1	18252355	18264462	gene	ID=AT1G49340;Note=protein_coding_gene;Name=AT1G49340	+	TAIR10	1136
PE_000277	chr1	18264971	18267270	gene	ID=AT1G49350;Note=protein_coding_gene;Name=AT1G49350	+	TAIR10	1355
PE_000278	chr1	18264971	18267270	gene	ID=AT1G49350;Note=protein_coding_gene;Name=AT1G49350	+	TAIR10	1719
PE_000278	chr1	18267231	18269448	gene	ID=AT1G49360;Note=protein_coding_gene;Name=AT1G49360	-	TAIR10	1320
PE_000279	chr1	18264971	18267270	gene	ID=AT1G49350;Note=protein_coding_gene;Name=AT1G49350	+	TAIR10	1349
PE_000279	chr1	18267231	18269448	gene	ID=AT1G49360;Note=protein_coding_gene;Name=AT1G49360	-	TAIR10	1690
PE_000280	chr1	18416474	18420083	gene	ID=AT1G49760;Note=protein_coding_gene;Name=AT1G49760	+	TAIR10	1436
PE_000280	chr1	18420648	18420692	transposable_element	ID=AT1TE61050;Name=AT1TE61050;Alias=ATHPOGON1	-	TAIR10	44
PE_000280	chr1	18420648	18420692	transposon_fragment	Parent=AT1TE61050	-	TAIR10	44
PE_000280	chr1	18420693	18421416	transposable_element	ID=AT1TE61055;Name=AT1TE61055;Alias=ATHPOGON2	-	TAIR10	723
PE_000280	chr1	18420693	18421416	transposon_fragment	Parent=AT1TE61055	-	TAIR10	723
PE_000280	chr1	18421417	18421503	transposable_element	ID=AT1TE61060;Name=AT1TE61060;Alias=ATREP4	+	TAIR10	86
PE_000280	chr1	18421417	18421503	transposon_fragment	Parent=AT1TE61060	+	TAIR10	86
PE_000280	chr1	18421504	18424352	transposable_element	ID=AT1TE61065;Name=AT1TE61065;Alias=ATREP10D	+	TAIR10	143
PE_000280	chr1	18421504	18424352	transposon_fragment	Parent=AT1TE61065	+	TAIR10	143
PE_000281	chr1	18458666	18459906	gene	ID=AT1G49860;Note=protein_coding_gene;Name=AT1G49860	+	TAIR10	1240
PE_000281	chr1	18460212	18463785	gene	ID=AT1G49870;Note=protein_coding_gene;Name=AT1G49870	+	TAIR10	1353
PE_000282	chr1	18470075	18473823	gene	ID=AT1G49890;Note=protein_coding_gene;Name=AT1G49890	+	TAIR10	1373
PE_000282	chr1	18473908	18477643	gene	ID=AT1G49900;Note=protein_coding_gene;Name=AT1G49900	-	TAIR10	1542
PE_000283	chr1	18473908	18477643	gene	ID=AT1G49900;Note=protein_coding_gene;Name=AT1G49900	-	TAIR10	649
PE_000283	chr1	18478688	18478753	transposable_element	ID=AT1TE61240;Name=AT1TE61240;Alias=ATLINE1A	-	TAIR10	65
PE_000283	chr1	18478688	18478753	transposon_fragment	Parent=AT1TE61240	-	TAIR10	65
PE_000283	chr1	18479025	18481475	gene	ID=AT1G49910;Note=protein_coding_gene;Name=AT1G49910	+	TAIR10	969
PE_000284	chr1	18473908	18477643	gene	ID=AT1G49900;Note=protein_coding_gene;Name=AT1G49900	-	TAIR10	266
PE_000284	chr1	18478688	18478753	transposable_element	ID=AT1TE61240;Name=AT1TE61240;Alias=ATLINE1A	-	TAIR10	65
PE_000284	chr1	18478688	18478753	transposon_fragment	Parent=AT1TE61240	-	TAIR10	65
PE_000284	chr1	18479025	18481475	gene	ID=AT1G49910;Note=protein_coding_gene;Name=AT1G49910	+	TAIR10	1352
PE_000285	chr1	18481774	18484233	gene	ID=AT1G49920;Note=protein_coding_gene;Name=AT1G49920	-	TAIR10	1256
PE_000285	chr1	18484932	18485639	gene	ID=AT1G49930;Note=protein_coding_gene;Name=AT1G49930	+	TAIR10	707
PE_000286	chr1	18494103	18497239	gene	ID=AT1G49950;Note=protein_coding_gene;Name=AT1G49950	-	TAIR10	1650
PE_000286	chr1	18492123	18493258	gene	ID=AT1G49952;Note=other_RNA;Name=AT1G49952	-	TAIR10	505
PE_000286	chr1	18492123	18493258	ncRNA	ID=AT1G49952.1;Parent=AT1G49952;Name=AT1G49952.1;Index=1	-	TAIR10	505
PE_000286	chr1	18493601	18493711	transposable_element	ID=AT1TE61290;Name=AT1TE61290;Alias=ARNOLDY2	+	TAIR10	110
PE_000286	chr1	18493601	18493711	transposon_fragment	Parent=AT1TE61290	+	TAIR10	110
PE_000286	chr1	18493712	18494035	transposable_element	ID=AT1TE61295;Name=AT1TE61295;Alias=ARNOLDY1	+	TAIR10	323
PE_000286	chr1	18493712	18494035	transposon_fragment	Parent=AT1TE61295	+	TAIR10	323
PE_000287	chr1	18494103	18497239	gene	ID=AT1G49950;Note=protein_coding_gene;Name=AT1G49950	-	TAIR10	1494
PE_000287	chr1	18498639	18501886	gene	ID=AT1G49960;Note=protein_coding_gene;Name=AT1G49960	+	TAIR10	106
PE_000287	chr1	18497675	18498299	transposable_element	ID=AT1TE61305;Name=AT1TE61305;Alias=ATREP15	+	TAIR10	624
PE_000287	chr1	18497675	18498299	transposon_fragment	Parent=AT1TE61305	+	TAIR10	624
PE_000288	chr1	18666986	18667677	gene	ID=AT1G50390;Note=protein_coding_gene;Name=AT1G50390	-	TAIR10	691
PE_000288	chr1	18668155	18670546	gene	ID=AT1G50400;Note=protein_coding_gene;Name=AT1G50400	+	TAIR10	1347
PE_000289	chr1	18821267	18823077	gene	ID=AT1G50780;Note=protein_coding_gene;Name=AT1G50780	+	TAIR10	1810
PE_000290	chr1	18870139	18872930	gene	ID=AT1G50920;Note=protein_coding_gene;Name=AT1G50920	+	TAIR10	1071
PE_000290	chr1	18873930	18874466	transposable_element	ID=AT1TE62530;Name=AT1TE62530;Alias=ATLANTYS3	-	TAIR10	536
PE_000290	chr1	18873930	18874466	transposon_fragment	Parent=AT1TE62530	-	TAIR10	536
PE_000291	chr1	18949591	18951783	gene	ID=AT1G51160;Note=protein_coding_gene;Name=AT1G51160	+	TAIR10	1181
PE_000291	chr1	18953458	18954892	gene	ID=AT1G51170;Note=protein_coding_gene;Name=AT1G51170	-	TAIR10	144
PE_000292	chr1	19106687	19109587	gene	ID=AT1G51520;Note=protein_coding_gene;Name=AT1G51520	+	TAIR10	1356
PE_000292	chr1	19109854	19112157	gene	ID=AT1G51530;Note=protein_coding_gene;Name=AT1G51530	+	TAIR10	1377
PE_000293	chr1	19109854	19112157	gene	ID=AT1G51530;Note=protein_coding_gene;Name=AT1G51530	+	TAIR10	1030
PE_000293	chr1	19113183	19115273	gene	ID=AT1G51538;Note=protein_coding_gene;Name=AT1G51538	+	TAIR10	944
PE_000294	chr1	19109854	19112157	gene	ID=AT1G51530;Note=protein_coding_gene;Name=AT1G51530	+	TAIR10	682
PE_000294	chr1	19113183	19115273	gene	ID=AT1G51538;Note=protein_coding_gene;Name=AT1G51538	+	TAIR10	1292
PE_000295	chr1	19140130	19141787	gene	ID=AT1G51620;Note=protein_coding_gene;Name=AT1G51620	+	TAIR10	1433
PE_000295	chr1	19136251	19139918	gene	ID=AT1G51610;Note=protein_coding_gene;Name=AT1G51610	+	TAIR10	1355
PE_000296	chr1	19195194	19197149	transposable_element_gene	ID=AT1G51750;Note=transposable_element_gene;Name=AT1G51750;Derives_from=AT1TE63610	+	TAIR10	1233
PE_000296	chr1	19195167	19197293	transposable_element	ID=AT1TE63610;Name=AT1TE63610;Alias=ATLINEIII	+	TAIR10	1377
PE_000296	chr1	19195167	19197293	transposon_fragment	Parent=AT1TE63610	+	TAIR10	1377
PE_000296	chr1	19198196	19198428	transposable_element	ID=AT1TE63615;Name=AT1TE63615;Alias=ATHATN8	+	TAIR10	232
PE_000296	chr1	19198196	19198428	transposon_fragment	Parent=AT1TE63615	+	TAIR10	232
PE_000297	chr1	19407364	19408254	gene	ID=AT1G52140;Note=protein_coding_gene;Name=AT1G52140	-	TAIR10	202
PE_000297	chr1	19409711	19414678	gene	ID=AT1G52150;Note=protein_coding_gene;Name=AT1G52150	-	TAIR10	1341
PE_000298	chr1	19526166	19526888	gene	ID=AT1G52415;Note=protein_coding_gene;Name=AT1G52415	+	TAIR10	655
PE_000298	chr1	19526802	19527727	transposable_element	ID=AT1TE64630;Name=AT1TE64630;Alias=ATREP11	+	TAIR10	925
PE_000298	chr1	19526802	19527727	transposon_fragment	Parent=AT1TE64630	+	TAIR10	925
PE_000298	chr1	19527842	19531287	gene	ID=AT1G52420;Note=protein_coding_gene;Name=AT1G52420	+	TAIR10	1391
PE_000299	chr1	19531350	19535955	gene	ID=AT1G52430;Note=protein_coding_gene;Name=AT1G52430	-	TAIR10	1001
PE_000299	chr1	19527842	19531287	gene	ID=AT1G52420;Note=protein_coding_gene;Name=AT1G52420	+	TAIR10	1936
PE_000300	chr1	19531350	19535955	gene	ID=AT1G52430;Note=protein_coding_gene;Name=AT1G52430	-	TAIR10	1345
PE_000300	chr1	19536436	19536766	transposable_element	ID=AT1TE64645;Name=AT1TE64645;Alias=BRODYAGA1	+	TAIR10	330
PE_000300	chr1	19536436	19536766	transposon_fragment	Parent=AT1TE64645	+	TAIR10	330
PE_000301	chr1	19538821	19540907	gene	ID=AT1G52440;Note=protein_coding_gene;Name=AT1G52440	+	TAIR10	1132
PE_000301	chr1	19541684	19546266	gene	ID=AT1G52450;Note=protein_coding_gene;Name=AT1G52450	-	TAIR10	1091
PE_000302	chr1	19546755	19547208	transposable_element	ID=AT1TE64665;Name=AT1TE64665;Alias=HELITRONY3	+	TAIR10	453
PE_000302	chr1	19546755	19547208	transposon_fragment	Parent=AT1TE64665	+	TAIR10	453
PE_000302	chr1	19541684	19546266	gene	ID=AT1G52450;Note=protein_coding_gene;Name=AT1G52450	-	TAIR10	1217
PE_000303	chr1	19646465	19649261	gene	ID=AT1G52750;Note=protein_coding_gene;Name=AT1G52750	-	TAIR10	1301
PE_000303	chr1	19649523	19650350	transposable_element	ID=AT1TE64990;Name=AT1TE64990;Alias=HELITRON2	+	TAIR10	827
PE_000303	chr1	19649523	19650350	transposon_fragment	Parent=AT1TE64990	+	TAIR10	827
PE_000303	chr1	19650652	19651289	transposable_element	ID=AT1TE64995;Name=AT1TE64995;Alias=ATREP10D	-	TAIR10	308
PE_000303	chr1	19650652	19651289	transposon_fragment	Parent=AT1TE64995	-	TAIR10	308
PE_000304	chr1	19760001	19761452	gene	ID=AT1G53030;Note=protein_coding_gene;Name=AT1G53030	-	TAIR10	1241
PE_000304	chr1	19756824	19759623	gene	ID=AT1G53025;Note=protein_coding_gene;Name=AT1G53025	-	TAIR10	1381
PE_000305	chr1	19783352	19786902	gene	ID=AT1G53090;Note=protein_coding_gene;Name=AT1G53090	+	TAIR10	1541
PE_000305	chr1	19786900	19789029	gene	ID=AT1G53100;Note=protein_coding_gene;Name=AT1G53100	-	TAIR10	1461
PE_000306	chr1	19799238	19802598	gene	ID=AT1G53140;Note=protein_coding_gene;Name=AT1G53140	+	TAIR10	1414
PE_000307	chr1	19844632	19847836	gene	ID=AT1G53210;Note=protein_coding_gene;Name=AT1G53210	+	TAIR10	1484
PE_000307	chr1	19847973	19848046	gene	ID=AT1G53220;Note=tRNA;Name=AT1G53220	+	TAIR10	73
PE_000307	chr1	19847973	19848046	tRNA	ID=AT1G53220.1;Parent=AT1G53220;Name=AT1G53220.1;Index=1	+	TAIR10	73
PE_000308	chr1	19879422	19882375	gene	ID=AT1G53300;Note=protein_coding_gene;Name=AT1G53300	+	TAIR10	333
PE_000308	chr1	19884027	19888369	gene	ID=AT1G53310;Note=protein_coding_gene;Name=AT1G53310	-	TAIR10	1015
PE_000309	chr1	19884027	19888369	gene	ID=AT1G53310;Note=protein_coding_gene;Name=AT1G53310	-	TAIR10	1834
PE_000310	chr1	19958587	19961578	gene	ID=AT1G53470;Note=protein_coding_gene;Name=AT1G53470	+	TAIR10	877
PE_000310	chr1	19963047	19964712	gene	ID=AT1G53480;Note=protein_coding_gene;Name=AT1G53480	-	TAIR10	654
PE_000310	chr1	19963267	19966952	gene	ID=AT1G53490;Note=protein_coding_gene;Name=AT1G53490	+	TAIR10	434
PE_000310	chr1	19961744	19962050	transposable_element	ID=AT1TE65980;Name=AT1TE65980;Alias=ATREP9	-	TAIR10	306
PE_000310	chr1	19961744	19962050	transposon_fragment	Parent=AT1TE65980	-	TAIR10	306
PE_000311	chr1	20056533	20059638	gene	ID=AT1G53720;Note=protein_coding_gene;Name=AT1G53720	+	TAIR10	1647
PE_000312	chr1	20056533	20059638	gene	ID=AT1G53720;Note=protein_coding_gene;Name=AT1G53720	+	TAIR10	760
PE_000312	chr1	20061701	20065713	gene	ID=AT1G53730;Note=protein_coding_gene;Name=AT1G53730	+	TAIR10	177
PE_000313	chr1	20061701	20065713	gene	ID=AT1G53730;Note=protein_coding_gene;Name=AT1G53730	+	TAIR10	1358
PE_000313	chr1	20065714	20068466	gene	ID=AT1G53750;Note=protein_coding_gene;Name=AT1G53750	-	TAIR10	1641
PE_000314	chr1	20192962	20193867	gene	ID=AT1G54095;Note=protein_coding_gene;Name=AT1G54095	+	TAIR10	216
PE_000314	chr1	20195264	20199130	gene	ID=AT1G54100;Note=protein_coding_gene;Name=AT1G54100	-	TAIR10	1387
PE_000314	chr1	20194006	20194456	transposable_element	ID=AT1TE66725;Name=AT1TE66725;Alias=ATREP10D	-	TAIR10	450
PE_000314	chr1	20194006	20194456	transposon_fragment	Parent=AT1TE66725	-	TAIR10	450
PE_000314	chr1	20194457	20194818	transposable_element	ID=AT1TE66730;Name=AT1TE66730;Alias=ATTIRX1C	-	TAIR10	361
PE_000314	chr1	20194457	20194818	transposon_fragment	Parent=AT1TE66730	-	TAIR10	361
PE_000314	chr1	20194819	20195415	transposable_element	ID=AT1TE66735;Name=AT1TE66735;Alias=ATREP19	-	TAIR10	596
PE_000314	chr1	20194819	20195415	transposon_fragment	Parent=AT1TE66735	-	TAIR10	596
PE_000315	chr1	20202118	20204177	gene	ID=AT1G54115;Note=protein_coding_gene;Name=AT1G54115	+	TAIR10	1178
PE_000315	chr1	20205026	20205321	transposable_element	ID=AT1TE66760;Name=AT1TE66760;Alias=ATREP10D	+	TAIR10	295
PE_000315	chr1	20205026	20205321	transposon_fragment	Parent=AT1TE66760	+	TAIR10	295
PE_000315	chr1	20205322	20205352	transposable_element	ID=AT1TE66765;Name=AT1TE66765;Alias=ATREP2	-	TAIR10	30
PE_000315	chr1	20205322	20205352	transposon_fragment	Parent=AT1TE66765	-	TAIR10	30
PE_000315	chr1	20205353	20206079	transposable_element	ID=AT1TE66770;Name=AT1TE66770;Alias=ATREP2	-	TAIR10	646
PE_000315	chr1	20205353	20206079	transposon_fragment	Parent=AT1TE66770	-	TAIR10	646
PE_000316	chr1	20221060	20225948	gene	ID=AT1G54170;Note=protein_coding_gene;Name=AT1G54170	-	TAIR10	1424
PE_000317	chr1	20246037	20250310	gene	ID=AT1G54220;Note=protein_coding_gene;Name=AT1G54220	-	TAIR10	1436
PE_000317	chr1	20250518	20252365	gene	ID=AT1G54230;Note=protein_coding_gene;Name=AT1G54230	+	TAIR10	1356
PE_000318	chr1	20252782	20254708	gene	ID=AT1G54240;Note=protein_coding_gene;Name=AT1G54240	+	TAIR10	1347
PE_000318	chr1	20250518	20252365	gene	ID=AT1G54230;Note=protein_coding_gene;Name=AT1G54230	+	TAIR10	1236
PE_000319	chr1	20259692	20262266	gene	ID=AT1G54270;Note=protein_coding_gene;Name=AT1G54270	+	TAIR10	1444
PE_000319	chr1	20262766	20267821	gene	ID=AT1G54280;Note=protein_coding_gene;Name=AT1G54280	-	TAIR10	1056
PE_000320	chr1	20540693	20540890	gene	ID=AT1G55045;Note=protein_coding_gene;Name=AT1G55045	+	TAIR10	197
PE_000320	chr1	20540948	20541038	transposable_element	ID=AT1TE67865;Name=AT1TE67865;Alias=ATLINE1A	+	TAIR10	90
PE_000320	chr1	20540948	20541038	transposon_fragment	Parent=AT1TE67865	+	TAIR10	90
PE_000320	chr1	20541887	20545762	gene	ID=AT1G55050;Note=protein_coding_gene;Name=AT1G55050	+	TAIR10	1494
PE_000321	chr1	20541887	20545762	gene	ID=AT1G55050;Note=protein_coding_gene;Name=AT1G55050	+	TAIR10	2191
PE_000322	chr1	20549533	20550225	gene	ID=AT1G55060;Note=protein_coding_gene;Name=AT1G55060	+	TAIR10	655
PE_000322	chr1	20547877	20548257	transposable_element	ID=AT1TE67880;Name=AT1TE67880;Alias=BOMZH2	-	TAIR10	380
PE_000322	chr1	20547877	20548257	transposon_fragment	Parent=AT1TE67880	-	TAIR10	380
PE_000322	chr1	20548258	20548290	transposable_element	ID=AT1TE67885;Name=AT1TE67885;Alias=ARNOLD1	+	TAIR10	32
PE_000322	chr1	20548258	20548290	transposon_fragment	Parent=AT1TE67885	+	TAIR10	32
PE_000322	chr1	20548291	20548554	transposable_element	ID=AT1TE67890;Name=AT1TE67890;Alias=ATDNA2T9C	+	TAIR10	263
PE_000322	chr1	20548291	20548554	transposon_fragment	Parent=AT1TE67890	+	TAIR10	263
PE_000323	chr1	20637380	20648434	gene	ID=AT1G55325;Note=protein_coding_gene;Name=AT1G55325	+	TAIR10	3000
PE_000324	chr1	20701499	20703460	gene	ID=AT1G55440;Note=protein_coding_gene;Name=AT1G55440	-	TAIR10	1085
PE_000324	chr1	20704918	20706893	gene	ID=AT1G55450;Note=protein_coding_gene;Name=AT1G55450	-	TAIR10	457
PE_000325	chr1	20743828	20745109	gene	ID=AT1G55546;Note=protein_coding_gene;Name=AT1G55546	+	TAIR10	1281
PE_000326	chr1	20779874	20784017	gene	ID=AT1G55610;Note=protein_coding_gene;Name=AT1G55610	-	TAIR10	2879
PE_000327	chr1	20831052	20834519	gene	ID=AT1G55730;Note=protein_coding_gene;Name=AT1G55730	-	TAIR10	505
PE_000327	chr1	20835366	20838778	gene	ID=AT1G55740;Note=protein_coding_gene;Name=AT1G55740	-	TAIR10	1648
PE_000327	chr1	20834542	20834828	transposable_element	ID=AT1TE68810;Name=AT1TE68810;Alias=ATREP9	-	TAIR10	286
PE_000327	chr1	20834542	20834828	transposon_fragment	Parent=AT1TE68810	-	TAIR10	286
PE_000328	chr1	20917190	20918462	gene	ID=AT1G55928;Note=protein_coding_gene;Name=AT1G55928	+	TAIR10	1272
PE_000329	chr1	20932129	20938290	gene	ID=AT1G55970;Note=protein_coding_gene;Name=AT1G55970	-	TAIR10	1196
PE_000329	chr1	20938899	20941813	gene	ID=AT1G55980;Note=protein_coding_gene;Name=AT1G55980	-	TAIR10	1195
PE_000330	chr1	20944141	20946718	gene	ID=AT1G56000;Note=protein_coding_gene;Name=AT1G56000	+	TAIR10	1772
PE_000330	chr1	20946571	20949281	gene	ID=AT1G56010;Note=protein_coding_gene;Name=AT1G56010	-	TAIR10	1375
PE_000331	chr1	20944141	20946718	gene	ID=AT1G56000;Note=protein_coding_gene;Name=AT1G56000	+	TAIR10	1630
PE_000331	chr1	20946571	20949281	gene	ID=AT1G56010;Note=protein_coding_gene;Name=AT1G56010	-	TAIR10	1517
PE_000332	chr1	20974161	20976291	gene	ID=AT1G56080;Note=protein_coding_gene;Name=AT1G56080	-	TAIR10	1506
PE_000332	chr1	20976515	20977541	gene	ID=AT1G56085;Note=protein_coding_gene;Name=AT1G56085	+	TAIR10	1026
PE_000332	chr1	20977695	20979357	gene	ID=AT1G56090;Note=protein_coding_gene;Name=AT1G56090	-	TAIR10	90
PE_000333	chr1	20974161	20976291	gene	ID=AT1G56080;Note=protein_coding_gene;Name=AT1G56080	-	TAIR10	68
PE_000333	chr1	20976515	20977541	gene	ID=AT1G56085;Note=protein_coding_gene;Name=AT1G56085	+	TAIR10	1026
PE_000333	chr1	20977695	20979357	gene	ID=AT1G56090;Note=protein_coding_gene;Name=AT1G56090	-	TAIR10	1528
PE_000334	chr1	20984389	20986951	gene	ID=AT1G56110;Note=protein_coding_gene;Name=AT1G56110	-	TAIR10	1272
PE_000334	chr1	20987288	20993072	gene	ID=AT1G56120;Note=protein_coding_gene;Name=AT1G56120	-	TAIR10	1391
PE_000335	chr1	21146239	21149805	gene	ID=AT1G56460;Note=protein_coding_gene;Name=AT1G56460	+	TAIR10	1580
PE_000335	chr1	21149706	21150153	pseudogene	ID=AT1G56470;Note=pseudogene;Name=AT1G56470	+	TAIR10	447
PE_000335	chr1	21149706	21150153	pseudogenic_transcript	ID=AT1G56470.1;Parent=AT1G56470;Name=AT1G56470.1;Index=1	+	TAIR10	447
PE_000335	chr1	21149706	21150153	pseudogenic_exon	Parent=AT1G56470.1	+	TAIR10	447
PE_000335	chr1	21150293	21152844	pseudogene	ID=AT1G56480;Note=pseudogene;Name=AT1G56480	-	TAIR10	932
PE_000335	chr1	21150293	21152844	pseudogenic_transcript	ID=AT1G56480.1;Parent=AT1G56480;Name=AT1G56480.1;Index=1	-	TAIR10	932
PE_000335	chr1	21150293	21152844	pseudogenic_exon	Parent=AT1G56480.1	-	TAIR10	932
PE_000336	chr1	21253817	21255931	gene	ID=AT1G56690;Note=protein_coding_gene;Name=AT1G56690	+	TAIR10	1413
PE_000336	chr1	21252458	21252855	transposable_element	ID=AT1TE70210;Name=AT1TE70210;Alias=ATLINEIII	+	TAIR10	397
PE_000336	chr1	21252458	21252855	transposon_fragment	Parent=AT1TE70210	+	TAIR10	397
PE_000337	chr1	21253817	21255931	gene	ID=AT1G56690;Note=protein_coding_gene;Name=AT1G56690	+	TAIR10	1327
PE_000337	chr1	21256176	21257973	gene	ID=AT1G56700;Note=protein_coding_gene;Name=AT1G56700	+	TAIR10	1428
PE_000338	chr1	21362488	21364728	gene	ID=AT1G57680;Note=protein_coding_gene;Name=AT1G57680	-	TAIR10	935
PE_000338	chr1	21359987	21360536	transposable_element	ID=AT1TE70520;Name=AT1TE70520;Alias=HELITRONY1D	+	TAIR10	113
PE_000338	chr1	21359987	21360536	transposon_fragment	Parent=AT1TE70520	+	TAIR10	113
PE_000339	chr1	21515474	21518159	gene	ID=AT1G58110;Note=protein_coding_gene;Name=AT1G58110	-	TAIR10	1356
PE_000340	chr1	21553621	21558056	gene	ID=AT1G58210;Note=protein_coding_gene;Name=AT1G58210	+	TAIR10	1540
PE_000340	chr1	21558243	21562965	gene	ID=AT1G58220;Note=protein_coding_gene;Name=AT1G58220	-	TAIR10	1273
PE_000341	chr1	21579685	21580696	gene	ID=AT1G58235;Note=protein_coding_gene;Name=AT1G58235	-	TAIR10	185
PE_000341	chr1	21566148	21579123	gene	ID=AT1G58230;Note=protein_coding_gene;Name=AT1G58230	+	TAIR10	2253
PE_000342	chr1	21662916	21667445	gene	ID=AT1G58350;Note=protein_coding_gene;Name=AT1G58350	-	TAIR10	1062
PE_000342	chr1	21662483	21662906	transposable_element	ID=AT1TE71490;Name=AT1TE71490;Alias=ATREP10B	+	TAIR10	423
PE_000342	chr1	21662483	21662906	transposon_fragment	Parent=AT1TE71490	+	TAIR10	423
PE_000343	chr1	21861382	21866190	gene	ID=AT1G59520;Note=protein_coding_gene;Name=AT1G59520	+	TAIR10	1684
PE_000344	chr1	21924693	21929424	gene	ID=AT1G59660;Note=protein_coding_gene;Name=AT1G59660	+	TAIR10	765
PE_000344	chr1	21919745	21922923	gene	ID=AT1G59650;Note=protein_coding_gene;Name=AT1G59650	+	TAIR10	465
PE_000345	chr1	21924693	21929424	gene	ID=AT1G59660;Note=protein_coding_gene;Name=AT1G59660	+	TAIR10	1574
PE_000345	chr1	21930010	21931366	gene	ID=AT1G59670;Note=protein_coding_gene;Name=AT1G59670	+	TAIR10	840
PE_000345	chr1	21929379	21929504	transposable_element	ID=AT1TE72360;Name=AT1TE72360;Alias=HELITRONY3	-	TAIR10	125
PE_000345	chr1	21929379	21929504	transposon_fragment	Parent=AT1TE72360	-	TAIR10	125
PE_000345	chr1	21929509	21930036	transposable_element	ID=AT1TE72365;Name=AT1TE72365;Alias=ATTIR16T3A	-	TAIR10	527
PE_000345	chr1	21929509	21930036	transposon_fragment	Parent=AT1TE72365	-	TAIR10	527
PE_000346	chr1	22278975	22280586	gene	ID=AT1G60470;Note=protein_coding_gene;Name=AT1G60470	-	TAIR10	1498
PE_000347	chr1	22284122	22285076	pseudogene	ID=AT1G60480;Note=pseudogene;Name=AT1G60480	-	TAIR10	935
PE_000347	chr1	22284122	22285076	pseudogenic_transcript	ID=AT1G60480.1;Parent=AT1G60480;Name=AT1G60480.1;Index=1	-	TAIR10	935
PE_000347	chr1	22284122	22285076	pseudogenic_exon	Parent=AT1G60480.1	-	TAIR10	935
PE_000347	chr1	22282379	22282471	transposable_element	ID=AT1TE73560;Name=AT1TE73560;Alias=ATREP4	-	TAIR10	92
PE_000347	chr1	22282379	22282471	transposon_fragment	Parent=AT1TE73560	-	TAIR10	92
PE_000347	chr1	22282472	22282555	transposable_element	ID=AT1TE73565;Name=AT1TE73565;Alias=HELITRONY1B	+	TAIR10	83
PE_000347	chr1	22282472	22282555	transposon_fragment	Parent=AT1TE73565	+	TAIR10	83
PE_000347	chr1	22282556	22283316	transposable_element	ID=AT1TE73570;Name=AT1TE73570;Alias=ATREP15	+	TAIR10	760
PE_000347	chr1	22282556	22283316	transposon_fragment	Parent=AT1TE73570	+	TAIR10	760
PE_000348	chr1	22324645	22327359	gene	ID=AT1G60600;Note=protein_coding_gene;Name=AT1G60600	-	TAIR10	1275
PE_000349	chr1	22334662	22336908	gene	ID=AT1G60630;Note=protein_coding_gene;Name=AT1G60630	-	TAIR10	1311
PE_000349	chr1	22337375	22339672	gene	ID=AT1G60640;Note=protein_coding_gene;Name=AT1G60640	-	TAIR10	1222
PE_000350	chr1	22423909	22428022	gene	ID=AT1G60900;Note=protein_coding_gene;Name=AT1G60900	+	TAIR10	1330
PE_000350	chr1	22428167	22428237	gene	ID=AT1G60910;Note=tRNA;Name=AT1G60910	+	TAIR10	70
PE_000350	chr1	22428167	22428237	tRNA	ID=AT1G60910.1;Parent=AT1G60910;Name=AT1G60910.1;Index=1	+	TAIR10	70
PE_000350	chr1	22428605	22428844	gene	ID=AT1G60913;Note=protein_coding_gene;Name=AT1G60913	-	TAIR10	239
PE_000350	chr1	22428420	22428621	transposable_element	ID=AT1TE74015;Name=AT1TE74015;Alias=BRODYAGA1A	-	TAIR10	201
PE_000350	chr1	22428420	22428621	transposon_fragment	Parent=AT1TE74015	-	TAIR10	201
PE_000351	chr1	22430847	22438877	gene	ID=AT1G60930;Note=protein_coding_gene;Name=AT1G60930	-	TAIR10	1528
PE_000351	chr1	22439123	22442217	gene	ID=AT1G60940;Note=protein_coding_gene;Name=AT1G60940	-	TAIR10	1226
PE_000352	chr1	22460377	22461164	gene	ID=AT1G60987;Note=protein_coding_gene;Name=AT1G60987	+	TAIR10	787
PE_000352	chr1	22462160	22462721	gene	ID=AT1G60989;Note=protein_coding_gene;Name=AT1G60989	+	TAIR10	561
PE_000352	chr1	22462026	22465424	gene	ID=AT1G60990;Note=protein_coding_gene;Name=AT1G60990	-	TAIR10	911
PE_000353	chr1	22483207	22485969	gene	ID=AT1G61040;Note=protein_coding_gene;Name=AT1G61040	+	TAIR10	1362
PE_000353	chr1	22486736	22488284	gene	ID=AT1G61050;Note=protein_coding_gene;Name=AT1G61050	+	TAIR10	871
PE_000354	chr1	22483207	22485969	gene	ID=AT1G61040;Note=protein_coding_gene;Name=AT1G61040	+	TAIR10	1180
PE_000354	chr1	22486736	22488284	gene	ID=AT1G61050;Note=protein_coding_gene;Name=AT1G61050	+	TAIR10	1053
PE_000355	chr1	22544868	22546230	gene	ID=AT1G61160;Note=protein_coding_gene;Name=AT1G61160	-	TAIR10	1362
PE_000355	chr1	22545587	22546987	transposable_element	ID=AT1TE74370;Name=AT1TE74370;Alias=ATREP11	+	TAIR10	923
PE_000355	chr1	22545587	22546987	transposon_fragment	Parent=AT1TE74370	+	TAIR10	923
PE_000355	chr1	22542524	22544644	gene	ID=AT1G61150;Note=protein_coding_gene;Name=AT1G61150	+	TAIR10	1134
PE_000356	chr1	22564495	22571907	gene	ID=AT1G61210;Note=protein_coding_gene;Name=AT1G61210	+	TAIR10	1400
PE_000356	chr1	22572645	22575527	gene	ID=AT1G61215;Note=protein_coding_gene;Name=AT1G61215	+	TAIR10	862
PE_000357	chr1	22646072	22649521	gene	ID=AT1G61380;Note=protein_coding_gene;Name=AT1G61380	-	TAIR10	758
PE_000357	chr1	22642096	22645147	gene	ID=AT1G61370;Note=protein_coding_gene;Name=AT1G61370	-	TAIR10	1317
PE_000358	chr1	22646072	22649521	gene	ID=AT1G61380;Note=protein_coding_gene;Name=AT1G61380	-	TAIR10	1245
PE_000358	chr1	22642096	22645147	gene	ID=AT1G61370;Note=protein_coding_gene;Name=AT1G61370	-	TAIR10	830
PE_000359	chr1	22654596	22657774	gene	ID=AT1G61400;Note=protein_coding_gene;Name=AT1G61400	-	TAIR10	1433
PE_000359	chr1	22658552	22659461	gene	ID=AT1G61410;Note=protein_coding_gene;Name=AT1G61410	-	TAIR10	789
PE_000360	chr1	22660460	22663963	gene	ID=AT1G61420;Note=protein_coding_gene;Name=AT1G61420	-	TAIR10	1677
PE_000360	chr1	22664669	22668360	gene	ID=AT1G61430;Note=protein_coding_gene;Name=AT1G61430	-	TAIR10	617
PE_000361	chr1	22660460	22663963	gene	ID=AT1G61420;Note=protein_coding_gene;Name=AT1G61420	-	TAIR10	1030
PE_000361	chr1	22664669	22668360	gene	ID=AT1G61430;Note=protein_coding_gene;Name=AT1G61430	-	TAIR10	1264
PE_000362	chr1	22669245	22672323	gene	ID=AT1G61440;Note=protein_coding_gene;Name=AT1G61440	-	TAIR10	750
PE_000362	chr1	22673259	22673993	gene	ID=AT1G61450;Note=protein_coding_gene;Name=AT1G61450	+	TAIR10	734
PE_000362	chr1	22674198	22677713	gene	ID=AT1G61460;Note=protein_coding_gene;Name=AT1G61460	-	TAIR10	375
PE_000363	chr1	22882215	22885053	gene	ID=AT1G61900;Note=protein_coding_gene;Name=AT1G61900	-	TAIR10	1147
PE_000363	chr1	22881472	22881603	transposable_element	ID=AT1TE75420;Name=AT1TE75420;Alias=DT1	+	TAIR10	131
PE_000363	chr1	22881472	22881603	transposon_fragment	Parent=AT1TE75420	+	TAIR10	131
PE_000364	chr1	22882215	22885053	gene	ID=AT1G61900;Note=protein_coding_gene;Name=AT1G61900	-	TAIR10	1748
PE_000364	chr1	22881472	22881603	transposable_element	ID=AT1TE75420;Name=AT1TE75420;Alias=DT1	+	TAIR10	131
PE_000364	chr1	22881472	22881603	transposon_fragment	Parent=AT1TE75420	+	TAIR10	131
PE_000365	chr1	22955926	22956483	pseudogene	ID=AT1G62095;Note=pseudogene;Name=AT1G62095	-	TAIR10	557
PE_000365	chr1	22955926	22956483	pseudogenic_transcript	ID=AT1G62095.1;Parent=AT1G62095;Name=AT1G62095.1;Index=1	-	TAIR10	557
PE_000365	chr1	22955926	22956483	pseudogenic_exon	Parent=AT1G62095.1	-	TAIR10	557
PE_000365	chr1	22950681	22955118	pseudogene	ID=AT1G62090;Note=pseudogene;Name=AT1G62090	-	TAIR10	1406
PE_000365	chr1	22950681	22955118	pseudogenic_transcript	ID=AT1G62090.1;Parent=AT1G62090;Name=AT1G62090.1;Index=1	-	TAIR10	1406
PE_000365	chr1	22950681	22955118	pseudogenic_exon	Parent=AT1G62090.1	-	TAIR10	1406
PE_000365	chr1	22953881	22954021	transposable_element	ID=AT1TE75650;Name=AT1TE75650;Alias=RathE1_cons	+	TAIR10	140
PE_000365	chr1	22953881	22954021	transposon_fragment	Parent=AT1TE75650	+	TAIR10	140
PE_000366	chr1	22997826	22999796	gene	ID=AT1G62260;Note=protein_coding_gene;Name=AT1G62260	-	TAIR10	1325
PE_000366	chr1	23000157	23002093	gene	ID=AT1G62262;Note=protein_coding_gene;Name=AT1G62262	-	TAIR10	1314
PE_000367	chr1	23102793	23104647	gene	ID=AT1G62420;Note=protein_coding_gene;Name=AT1G62420	-	TAIR10	653
PE_000367	chr1	23105941	23109476	gene	ID=AT1G62430;Note=protein_coding_gene;Name=AT1G62430	-	TAIR10	1053
PE_000368	chr1	23128705	23129759	gene	ID=AT1G62480;Note=protein_coding_gene;Name=AT1G62480	+	TAIR10	1054
PE_000368	chr1	23127793	23128419	transposable_element	ID=AT1TE76245;Name=AT1TE76245;Alias=HELITRONY3	+	TAIR10	626
PE_000368	chr1	23127793	23128419	transposon_fragment	Parent=AT1TE76245	+	TAIR10	626
PE_000369	chr1	23128705	23129759	gene	ID=AT1G62480;Note=protein_coding_gene;Name=AT1G62480	+	TAIR10	1054
PE_000369	chr1	23127793	23128419	transposable_element	ID=AT1TE76245;Name=AT1TE76245;Alias=HELITRONY3	+	TAIR10	626
PE_000369	chr1	23127793	23128419	transposon_fragment	Parent=AT1TE76245	+	TAIR10	626
PE_000370	chr1	23128705	23129759	gene	ID=AT1G62480;Note=protein_coding_gene;Name=AT1G62480	+	TAIR10	1054
PE_000370	chr1	23130405	23131533	gene	ID=AT1G62490;Note=protein_coding_gene;Name=AT1G62490	-	TAIR10	106
PE_000370	chr1	23127793	23128419	transposable_element	ID=AT1TE76245;Name=AT1TE76245;Alias=HELITRONY3	+	TAIR10	626
PE_000370	chr1	23127793	23128419	transposon_fragment	Parent=AT1TE76245	+	TAIR10	626
PE_000371	chr1	23347561	23352697	gene	ID=AT1G63010;Note=protein_coding_gene;Name=AT1G63010	-	TAIR10	1543
PE_000371	chr1	23346993	23347545	transposable_element	ID=AT1TE76920;Name=AT1TE76920;Alias=ATREP5	-	TAIR10	552
PE_000371	chr1	23346993	23347545	transposon_fragment	Parent=AT1TE76920	-	TAIR10	552
PE_000372	chr1	23347561	23352697	gene	ID=AT1G63010;Note=protein_coding_gene;Name=AT1G63010	-	TAIR10	1958
PE_000372	chr1	23346993	23347545	transposable_element	ID=AT1TE76920;Name=AT1TE76920;Alias=ATREP5	-	TAIR10	552
PE_000372	chr1	23346993	23347545	transposon_fragment	Parent=AT1TE76920	-	TAIR10	552
PE_000373	chr1	23421864	23423828	gene	ID=AT1G63160;Note=protein_coding_gene;Name=AT1G63160	-	TAIR10	1426
PE_000373	chr1	23425352	23427311	gene	ID=AT1G63170;Note=protein_coding_gene;Name=AT1G63170	+	TAIR10	50
PE_000373	chr1	23423996	23424034	transposable_element	ID=AT1TE77130;Name=AT1TE77130;Alias=ATREP10D	-	TAIR10	38
PE_000373	chr1	23423996	23424034	transposon_fragment	Parent=AT1TE77130	-	TAIR10	38
PE_000373	chr1	23424035	23425021	transposable_element	ID=AT1TE77135;Name=AT1TE77135;Alias=ATMUN1	-	TAIR10	986
PE_000373	chr1	23424035	23425021	transposon_fragment	Parent=AT1TE77135	-	TAIR10	986
PE_000373	chr1	23425032	23425363	transposable_element	ID=AT1TE77140;Name=AT1TE77140;Alias=ATREP11	+	TAIR10	331
PE_000373	chr1	23425032	23425363	transposon_fragment	Parent=AT1TE77140	+	TAIR10	331
PE_000374	chr1	23425352	23427311	gene	ID=AT1G63170;Note=protein_coding_gene;Name=AT1G63170	+	TAIR10	1527
PE_000374	chr1	23427409	23429603	gene	ID=AT1G63180;Note=protein_coding_gene;Name=AT1G63180	-	TAIR10	1375
PE_000375	chr1	23456021	23458661	gene	ID=AT1G63240;Note=protein_coding_gene;Name=AT1G63240	-	TAIR10	1309
PE_000375	chr1	23454908	23454928	transposable_element	ID=AT1TE77220;Name=AT1TE77220;Alias=BRODYAGA2	+	TAIR10	20
PE_000375	chr1	23454908	23454928	transposon_fragment	Parent=AT1TE77220	+	TAIR10	20
PE_000375	chr1	23454929	23454949	transposable_element	ID=AT1TE77225;Name=AT1TE77225;Alias=ATHPOGON3	-	TAIR10	20
PE_000375	chr1	23454929	23454949	transposon_fragment	Parent=AT1TE77225	-	TAIR10	20
PE_000375	chr1	23454950	23455733	transposable_element	ID=AT1TE77230;Name=AT1TE77230;Alias=ATREP3	+	TAIR10	783
PE_000375	chr1	23454950	23455733	transposon_fragment	Parent=AT1TE77230	+	TAIR10	783
PE_000376	chr1	23456021	23458661	gene	ID=AT1G63240;Note=protein_coding_gene;Name=AT1G63240	-	TAIR10	1695
PE_000376	chr1	23454908	23454928	transposable_element	ID=AT1TE77220;Name=AT1TE77220;Alias=BRODYAGA2	+	TAIR10	20
PE_000376	chr1	23454908	23454928	transposon_fragment	Parent=AT1TE77220	+	TAIR10	20
PE_000376	chr1	23454929	23454949	transposable_element	ID=AT1TE77225;Name=AT1TE77225;Alias=ATHPOGON3	-	TAIR10	20
PE_000376	chr1	23454929	23454949	transposon_fragment	Parent=AT1TE77225	-	TAIR10	20
PE_000376	chr1	23454950	23455733	transposable_element	ID=AT1TE77230;Name=AT1TE77230;Alias=ATREP3	+	TAIR10	783
PE_000376	chr1	23454950	23455733	transposon_fragment	Parent=AT1TE77230	+	TAIR10	783
PE_000377	chr1	23542304	23543421	transposable_element	ID=AT1TE77520;Name=AT1TE77520;Alias=ATREP10D	+	TAIR10	598
PE_000377	chr1	23542304	23543421	transposon_fragment	Parent=AT1TE77520	+	TAIR10	598
PE_000377	chr1	23544656	23552030	gene	ID=AT1G63490;Note=protein_coding_gene;Name=AT1G63490	-	TAIR10	1167
PE_000378	chr1	23555686	23558899	gene	ID=AT1G63500;Note=protein_coding_gene;Name=AT1G63500	+	TAIR10	1218
PE_000378	chr1	23559187	23559258	gene	ID=AT1G63510;Note=tRNA;Name=AT1G63510	-	TAIR10	71
PE_000378	chr1	23559187	23559258	tRNA	ID=AT1G63510.1;Parent=AT1G63510;Name=AT1G63510.1;Index=1	-	TAIR10	71
PE_000378	chr1	23559887	23562143	gene	ID=AT1G63520;Note=protein_coding_gene;Name=AT1G63520	+	TAIR10	794
PE_000379	chr1	23562205	23562482	gene	ID=AT1G63522;Note=protein_coding_gene;Name=AT1G63522	-	TAIR10	277
PE_000379	chr1	23563315	23565555	gene	ID=AT1G63530;Note=protein_coding_gene;Name=AT1G63530	+	TAIR10	1398
PE_000379	chr1	23559887	23562143	gene	ID=AT1G63520;Note=protein_coding_gene;Name=AT1G63520	+	TAIR10	430
PE_000380	chr1	23742842	23745374	gene	ID=AT1G63990;Note=protein_coding_gene;Name=AT1G63990	-	TAIR10	1414
PE_000380	chr1	23745530	23745978	transposable_element	ID=AT1TE78170;Name=AT1TE78170;Alias=ATREP3	-	TAIR10	448
PE_000380	chr1	23745530	23745978	transposon_fragment	Parent=AT1TE78170	-	TAIR10	448
PE_000381	chr1	23802553	23802636	gene	ID=AT1G64120;Note=tRNA;Name=AT1G64120	+	TAIR10	83
PE_000381	chr1	23802553	23802636	tRNA	ID=AT1G64120.1;Parent=AT1G64120;Name=AT1G64120.1;Index=1	+	TAIR10	83
PE_000381	chr1	23802559	23803533	gene	ID=AT1G64130;Note=protein_coding_gene;Name=AT1G64130	+	TAIR10	974
PE_000381	chr1	23803793	23807159	gene	ID=AT1G64140;Note=protein_coding_gene;Name=AT1G64140	-	TAIR10	1433
PE_000381	chr1	23803793	23807159	gene	ID=AT1G64142;Note=protein_coding_gene;Name=AT1G64142	-	TAIR10	1433
PE_000382	chr1	23840888	23843251	transposable_element_gene	ID=AT1G64250;Note=transposable_element_gene;Name=AT1G64250;Derives_from=AT1TE78475	+	TAIR10	1111
PE_000382	chr1	23840888	23843251	transposable_element	ID=AT1TE78475;Name=AT1TE78475;Alias=Unassigned	+	TAIR10	1111
PE_000382	chr1	23840888	23843251	transposon_fragment	Parent=AT1TE78475	+	TAIR10	1111
PE_000382	chr1	23837561	23839897	transposable_element_gene	ID=AT1G64240;Note=transposable_element_gene;Name=AT1G64240;Derives_from=AT1TE78470	+	TAIR10	898
PE_000382	chr1	23837561	23839897	transposable_element	ID=AT1TE78470;Name=AT1TE78470;Alias=Unassigned	+	TAIR10	898
PE_000382	chr1	23837561	23839897	transposon_fragment	Parent=AT1TE78470	+	TAIR10	898
PE_000383	chr1	23840888	23843251	transposable_element_gene	ID=AT1G64250;Note=transposable_element_gene;Name=AT1G64250;Derives_from=AT1TE78475	+	TAIR10	509
PE_000383	chr1	23844954	23847206	gene	ID=AT1G64255;Note=protein_coding_gene;Name=AT1G64255	+	TAIR10	788
PE_000383	chr1	23840888	23843251	transposable_element	ID=AT1TE78475;Name=AT1TE78475;Alias=Unassigned	+	TAIR10	509
PE_000383	chr1	23840888	23843251	transposon_fragment	Parent=AT1TE78475	+	TAIR10	509
PE_000384	chr1	23844954	23847206	gene	ID=AT1G64255;Note=protein_coding_gene;Name=AT1G64255	+	TAIR10	1338
PE_000385	chr1	23844954	23847206	gene	ID=AT1G64255;Note=protein_coding_gene;Name=AT1G64255	+	TAIR10	1383
PE_000385	chr1	23847756	23849915	gene	ID=AT1G64260;Note=protein_coding_gene;Name=AT1G64260	+	TAIR10	1067
PE_000386	chr1	23847756	23849915	gene	ID=AT1G64260;Note=protein_coding_gene;Name=AT1G64260	+	TAIR10	870
PE_000386	chr1	23850572	23852785	transposable_element_gene	ID=AT1G64270;Note=transposable_element_gene;Name=AT1G64270;Derives_from=AT1TE78490	+	TAIR10	1473
PE_000386	chr1	23850572	23852785	transposable_element	ID=AT1TE78490;Name=AT1TE78490;Alias=Unassigned	+	TAIR10	1473
PE_000386	chr1	23850572	23852785	transposon_fragment	Parent=AT1TE78490	+	TAIR10	1473
PE_000387	chr1	23869036	23870548	gene	ID=AT1G64320;Note=protein_coding_gene;Name=AT1G64320	+	TAIR10	1176
PE_000387	chr1	23870905	23874198	gene	ID=AT1G64330;Note=protein_coding_gene;Name=AT1G64330	+	TAIR10	1467
PE_000388	chr1	24016643	24019271	gene	ID=AT1G64625;Note=protein_coding_gene;Name=AT1G64625	+	TAIR10	1360
PE_000389	chr1	24191348	24196073	gene	ID=AT1G65120;Note=protein_coding_gene;Name=AT1G65120	-	TAIR10	1279
PE_000389	chr1	24196472	24201022	gene	ID=AT1G65130;Note=protein_coding_gene;Name=AT1G65130	-	TAIR10	1322
PE_000390	chr1	24413931	24414970	pseudogene	ID=AT1G65642;Note=pseudogene;Name=AT1G65642	-	TAIR10	929
PE_000390	chr1	24413931	24414970	pseudogenic_transcript	ID=AT1G65642.1;Parent=AT1G65642;Name=AT1G65642.1;Index=1	-	TAIR10	929
PE_000390	chr1	24414927	24414970	pseudogenic_exon	Parent=AT1G65642.1	-	TAIR10	43
PE_000390	chr1	24414448	24414653	pseudogenic_exon	Parent=AT1G65642.1	-	TAIR10	205
PE_000390	chr1	24414106	24414329	pseudogenic_exon	Parent=AT1G65642.1	-	TAIR10	223
PE_000390	chr1	24415015	24417709	gene	ID=AT1G65650;Note=protein_coding_gene;Name=AT1G65650	-	TAIR10	2026
PE_000391	chr1	24489780	24493024	gene	ID=AT1G65840;Note=protein_coding_gene;Name=AT1G65840	+	TAIR10	1486
PE_000391	chr1	24493174	24493798	gene	ID=AT1G65845;Note=protein_coding_gene;Name=AT1G65845	-	TAIR10	624
PE_000391	chr1	24494441	24494664	transposable_element	ID=AT1TE80450;Name=AT1TE80450;Alias=BRODYAGA1A	+	TAIR10	97
PE_000391	chr1	24494441	24494664	transposon_fragment	Parent=AT1TE80450	+	TAIR10	97
PE_000392	chr1	24538886	24542129	gene	ID=AT1G65930;Note=protein_coding_gene;Name=AT1G65930	+	TAIR10	1710
PE_000393	chr1	24538886	24542129	gene	ID=AT1G65930;Note=protein_coding_gene;Name=AT1G65930	+	TAIR10	1352
PE_000393	chr1	24543652	24544101	pseudogene	ID=AT1G65940;Note=pseudogene;Name=AT1G65940	+	TAIR10	125
PE_000393	chr1	24543652	24544101	pseudogenic_transcript	ID=AT1G65940.1;Parent=AT1G65940;Name=AT1G65940.1;Index=1	+	TAIR10	125
PE_000393	chr1	24543652	24544101	pseudogenic_exon	Parent=AT1G65940.1	+	TAIR10	125
PE_000394	chr1	24583820	24586681	gene	ID=AT1G66040;Note=protein_coding_gene;Name=AT1G66040	-	TAIR10	1335
PE_000394	chr1	24588269	24588794	gene	ID=AT1G66045;Note=protein_coding_gene;Name=AT1G66045	+	TAIR10	77
PE_000394	chr1	24586767	24586872	transposable_element	ID=AT1TE80750;Name=AT1TE80750;Alias=ATREP15	-	TAIR10	105
PE_000394	chr1	24586767	24586872	transposon_fragment	Parent=AT1TE80750	-	TAIR10	105
PE_000394	chr1	24586873	24587898	transposable_element	ID=AT1TE80755;Name=AT1TE80755;Alias=ATREP3	-	TAIR10	1025
PE_000394	chr1	24586873	24587898	transposon_fragment	Parent=AT1TE80755	-	TAIR10	1025
PE_000394	chr1	24587899	24587923	transposable_element	ID=AT1TE80760;Name=AT1TE80760;Alias=ATREP15	-	TAIR10	24
PE_000394	chr1	24587899	24587923	transposon_fragment	Parent=AT1TE80760	-	TAIR10	24
PE_000395	chr1	24583820	24586681	gene	ID=AT1G66040;Note=protein_coding_gene;Name=AT1G66040	-	TAIR10	1059
PE_000395	chr1	24588269	24588794	gene	ID=AT1G66045;Note=protein_coding_gene;Name=AT1G66045	+	TAIR10	353
PE_000395	chr1	24586767	24586872	transposable_element	ID=AT1TE80750;Name=AT1TE80750;Alias=ATREP15	-	TAIR10	105
PE_000395	chr1	24586767	24586872	transposon_fragment	Parent=AT1TE80750	-	TAIR10	105
PE_000395	chr1	24586873	24587898	transposable_element	ID=AT1TE80755;Name=AT1TE80755;Alias=ATREP3	-	TAIR10	1025
PE_000395	chr1	24586873	24587898	transposon_fragment	Parent=AT1TE80755	-	TAIR10	1025
PE_000395	chr1	24587899	24587923	transposable_element	ID=AT1TE80760;Name=AT1TE80760;Alias=ATREP15	-	TAIR10	24
PE_000395	chr1	24587899	24587923	transposon_fragment	Parent=AT1TE80760	-	TAIR10	24
PE_000396	chr1	24588269	24588794	gene	ID=AT1G66045;Note=protein_coding_gene;Name=AT1G66045	+	TAIR10	525
PE_000396	chr1	24586873	24587898	transposable_element	ID=AT1TE80755;Name=AT1TE80755;Alias=ATREP3	-	TAIR10	105
PE_000396	chr1	24586873	24587898	transposon_fragment	Parent=AT1TE80755	-	TAIR10	105
PE_000396	chr1	24587899	24587923	transposable_element	ID=AT1TE80760;Name=AT1TE80760;Alias=ATREP15	-	TAIR10	24
PE_000396	chr1	24587899	24587923	transposon_fragment	Parent=AT1TE80760	-	TAIR10	24
PE_000396	chr1	24589487	24592747	gene	ID=AT1G66050;Note=protein_coding_gene;Name=AT1G66050	+	TAIR10	1306
PE_000397	chr1	24631409	24634749	gene	ID=AT1G66150;Note=protein_coding_gene;Name=AT1G66150	+	TAIR10	1637
PE_000398	chr1	24778271	24780629	gene	ID=AT1G66430;Note=protein_coding_gene;Name=AT1G66430	+	TAIR10	767
PE_000398	chr1	24782171	24784351	gene	ID=AT1G66440;Note=protein_coding_gene;Name=AT1G66440	+	TAIR10	691
PE_000399	chr1	24824459	24826670	gene	ID=AT1G66540;Note=protein_coding_gene;Name=AT1G66540	+	TAIR10	1713
PE_000400	chr1	24848320	24849364	gene	ID=AT1G66600;Note=protein_coding_gene;Name=AT1G66600	+	TAIR10	1044
PE_000400	chr1	24847019	24847152	transposable_element	ID=AT1TE81605;Name=AT1TE81605;Alias=ATDNA2T9C	-	TAIR10	133
PE_000400	chr1	24847019	24847152	transposon_fragment	Parent=AT1TE81605	-	TAIR10	133
PE_000400	chr1	24847153	24847594	transposable_element	ID=AT1TE81610;Name=AT1TE81610;Alias=HELITRONY1B	-	TAIR10	441
PE_000400	chr1	24847153	24847594	transposon_fragment	Parent=AT1TE81610	-	TAIR10	441
PE_000400	chr1	24847605	24847706	transposable_element	ID=AT1TE81615;Name=AT1TE81615;Alias=BRODYAGA1	+	TAIR10	101
PE_000400	chr1	24847605	24847706	transposon_fragment	Parent=AT1TE81615	+	TAIR10	101
PE_000401	chr1	25069562	25095526	gene	ID=AT1G67120;Note=protein_coding_gene;Name=AT1G67120	-	TAIR10	3000
PE_000402	chr1	25069562	25095526	gene	ID=AT1G67120;Note=protein_coding_gene;Name=AT1G67120	-	TAIR10	1278
PE_000403	chr1	25127246	25129457	gene	ID=AT1G67170;Note=protein_coding_gene;Name=AT1G67170	+	TAIR10	1611
PE_000403	chr1	25129731	25132169	gene	ID=AT1G67180;Note=protein_coding_gene;Name=AT1G67180	+	TAIR10	1115
PE_000404	chr1	25140265	25140551	pseudogene	ID=AT1G67200;Note=pseudogene;Name=AT1G67200	+	TAIR10	286
PE_000404	chr1	25140265	25140551	pseudogenic_transcript	ID=AT1G67200.1;Parent=AT1G67200;Name=AT1G67200.1;Index=1	+	TAIR10	286
PE_000404	chr1	25140265	25140551	pseudogenic_exon	Parent=AT1G67200.1	+	TAIR10	286
PE_000404	chr1	25140815	25144043	gene	ID=AT1G67210;Note=protein_coding_gene;Name=AT1G67210	+	TAIR10	1516
PE_000405	chr1	25325160	25327258	gene	ID=AT1G67570;Note=protein_coding_gene;Name=AT1G67570	+	TAIR10	1669
PE_000405	chr1	25327284	25331379	gene	ID=AT1G67580;Note=protein_coding_gene;Name=AT1G67580	-	TAIR10	1305
PE_000406	chr1	25336423	25337662	gene	ID=AT1G67600;Note=protein_coding_gene;Name=AT1G67600	-	TAIR10	1239
PE_000406	chr1	25339036	25340241	pseudogene	ID=AT1G67610;Note=pseudogene;Name=AT1G67610	-	TAIR10	193
PE_000406	chr1	25339036	25340241	pseudogenic_transcript	ID=AT1G67610.1;Parent=AT1G67610;Name=AT1G67610.1;Index=1	-	TAIR10	193
PE_000406	chr1	25339036	25340241	pseudogenic_exon	Parent=AT1G67610.1	-	TAIR10	193
PE_000407	chr1	25336423	25337662	gene	ID=AT1G67600;Note=protein_coding_gene;Name=AT1G67600	-	TAIR10	1026
PE_000407	chr1	25339036	25340241	pseudogene	ID=AT1G67610;Note=pseudogene;Name=AT1G67610	-	TAIR10	600
PE_000407	chr1	25339036	25340241	pseudogenic_transcript	ID=AT1G67610.1;Parent=AT1G67610;Name=AT1G67610.1;Index=1	-	TAIR10	600
PE_000407	chr1	25339036	25340241	pseudogenic_exon	Parent=AT1G67610.1	-	TAIR10	600
PE_000408	chr1	25342111	25343243	gene	ID=AT1G67623;Note=protein_coding_gene;Name=AT1G67623	+	TAIR10	285
PE_000408	chr1	25343437	25344066	transposable_element_gene	ID=AT1G67626;Note=transposable_element_gene;Name=AT1G67626;Derives_from=AT1TE83175	-	TAIR10	629
PE_000408	chr1	25343133	25343303	transposable_element	ID=AT1TE83170;Name=AT1TE83170;Alias=ATHATN6	+	TAIR10	170
PE_000408	chr1	25343133	25343303	transposon_fragment	Parent=AT1TE83170	+	TAIR10	170
PE_000408	chr1	25343349	25343969	transposable_element	ID=AT1TE83175;Name=AT1TE83175;Alias=ATLINE1_1	-	TAIR10	620
PE_000408	chr1	25343349	25343969	transposon_fragment	Parent=AT1TE83175	-	TAIR10	620
PE_000408	chr1	25343970	25344163	transposable_element	ID=AT1TE83180;Name=AT1TE83180;Alias=ATENSPM6	+	TAIR10	193
PE_000408	chr1	25343970	25344163	transposon_fragment	Parent=AT1TE83180	+	TAIR10	193
PE_000408	chr1	25344309	25344450	transposable_element	ID=AT1TE83185;Name=AT1TE83185;Alias=ATHATN2	+	TAIR10	141
PE_000408	chr1	25344309	25344450	transposon_fragment	Parent=AT1TE83185	+	TAIR10	141
PE_000408	chr1	25344440	25348406	gene	ID=AT1G67630;Note=protein_coding_gene;Name=AT1G67630	-	TAIR10	1518
PE_000409	chr1	25376751	25379144	gene	ID=AT1G67710;Note=protein_coding_gene;Name=AT1G67710	-	TAIR10	1513
PE_000410	chr1	25386341	25391073	gene	ID=AT1G67720;Note=protein_coding_gene;Name=AT1G67720	+	TAIR10	1303
PE_000410	chr1	25384013	25384683	transposable_element	ID=AT1TE83300;Name=AT1TE83300;Alias=ATREP3	+	TAIR10	39
PE_000410	chr1	25384013	25384683	transposon_fragment	Parent=AT1TE83300	+	TAIR10	39
PE_000411	chr1	25412816	25415530	gene	ID=AT1G67780;Note=protein_coding_gene;Name=AT1G67780	+	TAIR10	1190
PE_000411	chr1	25411657	25412067	transposable_element	ID=AT1TE83380;Name=AT1TE83380;Alias=HELITRONY1E	+	TAIR10	410
PE_000411	chr1	25411657	25412067	transposon_fragment	Parent=AT1TE83380	+	TAIR10	410
PE_000411	chr1	25411312	25411696	gene	ID=AT1G67775;Note=protein_coding_gene;Name=AT1G67775	-	TAIR10	384
PE_000412	chr1	25429853	25431564	gene	ID=AT1G67820;Note=protein_coding_gene;Name=AT1G67820	+	TAIR10	1441
PE_000412	chr1	25428560	25429180	transposable_element	ID=AT1TE83435;Name=AT1TE83435;Alias=ATREP4	+	TAIR10	620
PE_000412	chr1	25428560	25429180	transposon_fragment	Parent=AT1TE83435	+	TAIR10	620
PE_000413	chr1	25437900	25442142	gene	ID=AT1G67850;Note=protein_coding_gene;Name=AT1G67850	+	TAIR10	1361
PE_000413	chr1	25442256	25442876	gene	ID=AT1G67855;Note=protein_coding_gene;Name=AT1G67855	-	TAIR10	620
PE_000413	chr1	25442404	25443019	gene	ID=AT1G67856;Note=protein_coding_gene;Name=AT1G67856	+	TAIR10	615
PE_000414	chr1	25473544	25474140	gene	ID=AT1G67920;Note=protein_coding_gene;Name=AT1G67920	+	TAIR10	596
PE_000414	chr1	25474140	25477423	gene	ID=AT1G67930;Note=protein_coding_gene;Name=AT1G67930	-	TAIR10	1357
PE_000415	chr1	25804418	25808982	gene	ID=AT1G68720;Note=protein_coding_gene;Name=AT1G68720	+	TAIR10	2765
PE_000416	chr1	25809298	25810130	gene	ID=AT1G68725;Note=protein_coding_gene;Name=AT1G68725	+	TAIR10	832
PE_000416	chr1	25810321	25811128	gene	ID=AT1G68730;Note=protein_coding_gene;Name=AT1G68730	-	TAIR10	251
PE_000416	chr1	25809380	25809770	transposable_element	ID=AT1TE84620;Name=AT1TE84620;Alias=ATGP1	-	TAIR10	390
PE_000416	chr1	25809380	25809770	transposon_fragment	Parent=AT1TE84620	-	TAIR10	390
PE_000416	chr1	25804418	25808982	gene	ID=AT1G68720;Note=protein_coding_gene;Name=AT1G68720	+	TAIR10	1410
PE_000417	chr1	25822942	25828107	gene	ID=AT1G68750;Note=protein_coding_gene;Name=AT1G68750	-	TAIR10	615
PE_000417	chr1	25829042	25829813	gene	ID=AT1G68760;Note=protein_coding_gene;Name=AT1G68760	+	TAIR10	771
PE_000417	chr1	25829952	25830487	gene	ID=AT1G68765;Note=protein_coding_gene;Name=AT1G68765	-	TAIR10	535
PE_000417	chr1	25829654	25829725	gene	ID=AT1G68770;Note=tRNA;Name=AT1G68770	+	TAIR10	71
PE_000417	chr1	25829654	25829725	tRNA	ID=AT1G68770.1;Parent=AT1G68770;Name=AT1G68770.1;Index=1	+	TAIR10	71
PE_000417	chr1	25828490	25828932	transposable_element	ID=AT1TE84665;Name=AT1TE84665;Alias=ATREP5	+	TAIR10	442
PE_000417	chr1	25828490	25828932	transposon_fragment	Parent=AT1TE84665	+	TAIR10	442
PE_000418	chr1	25822942	25828107	gene	ID=AT1G68750;Note=protein_coding_gene;Name=AT1G68750	-	TAIR10	26
PE_000418	chr1	25829042	25829813	gene	ID=AT1G68760;Note=protein_coding_gene;Name=AT1G68760	+	TAIR10	771
PE_000418	chr1	25829952	25830487	gene	ID=AT1G68765;Note=protein_coding_gene;Name=AT1G68765	-	TAIR10	535
PE_000418	chr1	25829654	25829725	gene	ID=AT1G68770;Note=tRNA;Name=AT1G68770	+	TAIR10	71
PE_000418	chr1	25829654	25829725	tRNA	ID=AT1G68770.1;Parent=AT1G68770;Name=AT1G68770.1;Index=1	+	TAIR10	71
PE_000418	chr1	25828490	25828932	transposable_element	ID=AT1TE84665;Name=AT1TE84665;Alias=ATREP5	+	TAIR10	442
PE_000418	chr1	25828490	25828932	transposon_fragment	Parent=AT1TE84665	+	TAIR10	442
PE_000419	chr1	25829042	25829813	gene	ID=AT1G68760;Note=protein_coding_gene;Name=AT1G68760	+	TAIR10	733
PE_000419	chr1	25829952	25830487	gene	ID=AT1G68765;Note=protein_coding_gene;Name=AT1G68765	-	TAIR10	535
PE_000419	chr1	25829654	25829725	gene	ID=AT1G68770;Note=tRNA;Name=AT1G68770	+	TAIR10	71
PE_000419	chr1	25829654	25829725	tRNA	ID=AT1G68770.1;Parent=AT1G68770;Name=AT1G68770.1;Index=1	+	TAIR10	71
PE_000419	chr1	25831803	25833844	gene	ID=AT1G68780;Note=protein_coding_gene;Name=AT1G68780	-	TAIR10	277
PE_000420	chr1	25829042	25829813	gene	ID=AT1G68760;Note=protein_coding_gene;Name=AT1G68760	+	TAIR10	5
PE_000420	chr1	25829952	25830487	gene	ID=AT1G68765;Note=protein_coding_gene;Name=AT1G68765	-	TAIR10	535
PE_000420	chr1	25831803	25833844	gene	ID=AT1G68780;Note=protein_coding_gene;Name=AT1G68780	-	TAIR10	1005
PE_000421	chr1	25886536	25886609	gene	ID=AT1G68860;Note=tRNA;Name=AT1G68860	+	TAIR10	73
PE_000421	chr1	25886536	25886609	tRNA	ID=AT1G68860.1;Parent=AT1G68860;Name=AT1G68860.1;Index=1	+	TAIR10	73
PE_000421	chr1	25886804	25889024	gene	ID=AT1G68862;Note=protein_coding_gene;Name=AT1G68862	-	TAIR10	2220
PE_000421	chr1	25889081	25889734	gene	ID=AT1G68870;Note=protein_coding_gene;Name=AT1G68870	+	TAIR10	299
PE_000421	chr1	25889216	25889340	transposable_element	ID=AT1TE84840;Name=AT1TE84840;Alias=ATHAT1	+	TAIR10	124
PE_000421	chr1	25889216	25889340	transposon_fragment	Parent=AT1TE84840	+	TAIR10	124
PE_000421	chr1	25889341	25889366	transposable_element	ID=AT1TE84845;Name=AT1TE84845;Alias=ATCOPIA24	-	TAIR10	25
PE_000421	chr1	25889341	25889366	transposon_fragment	Parent=AT1TE84845	-	TAIR10	25
PE_000422	chr1	25890365	25891748	gene	ID=AT1G68872;Note=other_RNA;Name=AT1G68872	-	TAIR10	1383
PE_000422	chr1	25890365	25891748	ncRNA	ID=AT1G68872.1;Parent=AT1G68872;Name=AT1G68872.1;Index=1	-	TAIR10	1383
PE_000422	chr1	25892086	25892798	gene	ID=AT1G68875;Note=protein_coding_gene;Name=AT1G68875	+	TAIR10	712
PE_000423	chr1	25921453	25925845	gene	ID=AT1G68940;Note=protein_coding_gene;Name=AT1G68940	-	TAIR10	1108
PE_000423	chr1	25926963	25927331	gene	ID=AT1G68945;Note=protein_coding_gene;Name=AT1G68945	+	TAIR10	368
PE_000424	chr1	25964468	25967450	gene	ID=AT1G69060;Note=protein_coding_gene;Name=AT1G69060	+	TAIR10	1466
PE_000424	chr1	25962304	25963306	transposable_element	ID=AT1TE85075;Name=AT1TE85075;Alias=ATREP3	-	TAIR10	372
PE_000424	chr1	25962304	25963306	transposon_fragment	Parent=AT1TE85075	-	TAIR10	372
PE_000425	chr1	26084635	26086481	gene	ID=AT1G69390;Note=protein_coding_gene;Name=AT1G69390	+	TAIR10	1149
PE_000425	chr1	26086948	26089020	gene	ID=AT1G69400;Note=protein_coding_gene;Name=AT1G69400	+	TAIR10	1384
PE_000426	chr1	26097787	26099388	gene	ID=AT1G69430;Note=protein_coding_gene;Name=AT1G69430	+	TAIR10	960
PE_000427	chr1	26106911	26110267	gene	ID=AT1G69450;Note=protein_coding_gene;Name=AT1G69450	-	TAIR10	1360
PE_000427	chr1	26111809	26113243	gene	ID=AT1G69460;Note=protein_coding_gene;Name=AT1G69460	-	TAIR10	98
PE_000428	chr1	26131294	26133196	gene	ID=AT1G69526;Note=protein_coding_gene;Name=AT1G69526	+	TAIR10	1615
PE_000429	chr1	26191640	26193174	gene	ID=AT1G69630;Note=protein_coding_gene;Name=AT1G69630	-	TAIR10	1335
PE_000429	chr1	26193659	26195695	gene	ID=AT1G69640;Note=protein_coding_gene;Name=AT1G69640	-	TAIR10	1180
PE_000430	chr1	26248318	26253585	gene	ID=AT1G69770;Note=protein_coding_gene;Name=AT1G69770	-	TAIR10	2184
PE_000431	chr1	26293601	26295849	gene	ID=AT1G69840;Note=protein_coding_gene;Name=AT1G69840	-	TAIR10	842
PE_000431	chr1	26296676	26300472	gene	ID=AT1G69850;Note=protein_coding_gene;Name=AT1G69850	-	TAIR10	1331
PE_000431	chr1	26295857	26296545	transposable_element	ID=AT1TE86125;Name=AT1TE86125;Alias=ATREP4	-	TAIR10	688
PE_000431	chr1	26295857	26296545	transposon_fragment	Parent=AT1TE86125	-	TAIR10	688
PE_000432	chr1	26343369	26345058	gene	ID=AT1G69940;Note=protein_coding_gene;Name=AT1G69940	-	TAIR10	444
PE_000432	chr1	26346488	26348691	transposable_element_gene	ID=AT1G69950;Note=transposable_element_gene;Name=AT1G69950;Derives_from=AT1TE86305	+	TAIR10	1126
PE_000432	chr1	26345877	26346082	transposable_element	ID=AT1TE86300;Name=AT1TE86300;Alias=ATLINE1_3A	+	TAIR10	205
PE_000432	chr1	26345877	26346082	transposon_fragment	Parent=AT1TE86300	+	TAIR10	205
PE_000432	chr1	26346488	26348691	transposable_element	ID=AT1TE86305;Name=AT1TE86305;Alias=Unassigned	+	TAIR10	1126
PE_000432	chr1	26346488	26348691	transposon_fragment	Parent=AT1TE86305	+	TAIR10	1126
PE_000433	chr1	26419949	26422529	gene	ID=AT1G70160;Note=protein_coding_gene;Name=AT1G70160	+	TAIR10	1761
PE_000433	chr1	26422834	26422871	transposable_element	ID=AT1TE86530;Name=AT1TE86530;Alias=ARNOLDY1	-	TAIR10	37
PE_000433	chr1	26422834	26422871	transposon_fragment	Parent=AT1TE86530	-	TAIR10	37
PE_000433	chr1	26422872	26423276	transposable_element	ID=AT1TE86535;Name=AT1TE86535;Alias=ATREP5	-	TAIR10	404
PE_000433	chr1	26422872	26423276	transposon_fragment	Parent=AT1TE86535	-	TAIR10	404
PE_000433	chr1	26423277	26423349	transposable_element	ID=AT1TE86540;Name=AT1TE86540;Alias=ATTIR16T3A	-	TAIR10	72
PE_000433	chr1	26423277	26423349	transposon_fragment	Parent=AT1TE86540	-	TAIR10	72
PE_000433	chr1	26423350	26423776	transposable_element	ID=AT1TE86545;Name=AT1TE86545;Alias=ATTIR16T3A	-	TAIR10	418
PE_000433	chr1	26423350	26423776	transposon_fragment	Parent=AT1TE86545	-	TAIR10	418
PE_000434	chr1	26419949	26422529	gene	ID=AT1G70160;Note=protein_coding_gene;Name=AT1G70160	+	TAIR10	1648
PE_000434	chr1	26423874	26425356	gene	ID=AT1G70170;Note=protein_coding_gene;Name=AT1G70170	+	TAIR10	7
PE_000434	chr1	26422834	26422871	transposable_element	ID=AT1TE86530;Name=AT1TE86530;Alias=ARNOLDY1	-	TAIR10	37
PE_000434	chr1	26422834	26422871	transposon_fragment	Parent=AT1TE86530	-	TAIR10	37
PE_000434	chr1	26422872	26423276	transposable_element	ID=AT1TE86535;Name=AT1TE86535;Alias=ATREP5	-	TAIR10	404
PE_000434	chr1	26422872	26423276	transposon_fragment	Parent=AT1TE86535	-	TAIR10	404
PE_000434	chr1	26423277	26423349	transposable_element	ID=AT1TE86540;Name=AT1TE86540;Alias=ATTIR16T3A	-	TAIR10	72
PE_000434	chr1	26423277	26423349	transposon_fragment	Parent=AT1TE86540	-	TAIR10	72
PE_000434	chr1	26423350	26423776	transposable_element	ID=AT1TE86545;Name=AT1TE86545;Alias=ATTIR16T3A	-	TAIR10	426
PE_000434	chr1	26423350	26423776	transposon_fragment	Parent=AT1TE86545	-	TAIR10	426
PE_000435	chr1	26419949	26422529	gene	ID=AT1G70160;Note=protein_coding_gene;Name=AT1G70160	+	TAIR10	1348
PE_000435	chr1	26423874	26425356	gene	ID=AT1G70170;Note=protein_coding_gene;Name=AT1G70170	+	TAIR10	307
PE_000435	chr1	26422834	26422871	transposable_element	ID=AT1TE86530;Name=AT1TE86530;Alias=ARNOLDY1	-	TAIR10	37
PE_000435	chr1	26422834	26422871	transposon_fragment	Parent=AT1TE86530	-	TAIR10	37
PE_000435	chr1	26422872	26423276	transposable_element	ID=AT1TE86535;Name=AT1TE86535;Alias=ATREP5	-	TAIR10	404
PE_000435	chr1	26422872	26423276	transposon_fragment	Parent=AT1TE86535	-	TAIR10	404
PE_000435	chr1	26423277	26423349	transposable_element	ID=AT1TE86540;Name=AT1TE86540;Alias=ATTIR16T3A	-	TAIR10	72
PE_000435	chr1	26423277	26423349	transposon_fragment	Parent=AT1TE86540	-	TAIR10	72
PE_000435	chr1	26423350	26423776	transposable_element	ID=AT1TE86545;Name=AT1TE86545;Alias=ATTIR16T3A	-	TAIR10	426
PE_000435	chr1	26423350	26423776	transposon_fragment	Parent=AT1TE86545	-	TAIR10	426
PE_000436	chr1	26477880	26481630	gene	ID=AT1G70300;Note=protein_coding_gene;Name=AT1G70300	-	TAIR10	1137
PE_000437	chr1	26545414	26549216	gene	ID=AT1G70430;Note=protein_coding_gene;Name=AT1G70430	+	TAIR10	1319
PE_000438	chr1	26552576	26554437	gene	ID=AT1G70450;Note=protein_coding_gene;Name=AT1G70450	+	TAIR10	1175
PE_000438	chr1	26551492	26552205	transposable_element	ID=AT1TE86940;Name=AT1TE86940;Alias=ATREP13	+	TAIR10	713
PE_000438	chr1	26551492	26552205	transposon_fragment	Parent=AT1TE86940	+	TAIR10	713
PE_000439	chr1	26566579	26568729	gene	ID=AT1G70500;Note=protein_coding_gene;Name=AT1G70500	-	TAIR10	42
PE_000439	chr1	26570647	26572463	gene	ID=AT1G70505;Note=protein_coding_gene;Name=AT1G70505	+	TAIR10	1040
PE_000440	chr1	26570647	26572463	gene	ID=AT1G70505;Note=protein_coding_gene;Name=AT1G70505	+	TAIR10	1196
PE_000441	chr1	26612632	26616069	gene	ID=AT1G70580;Note=protein_coding_gene;Name=AT1G70580	+	TAIR10	1476
PE_000441	chr1	26616267	26616996	gene	ID=AT1G70581;Note=other_RNA;Name=AT1G70581	+	TAIR10	729
PE_000441	chr1	26616267	26616996	ncRNA	ID=AT1G70581.1;Parent=AT1G70581;Name=AT1G70581.1;Index=1	+	TAIR10	729
PE_000441	chr1	26616837	26617456	transposable_element	ID=AT1TE87140;Name=AT1TE87140;Alias=HELITRONY2	+	TAIR10	619
PE_000441	chr1	26616837	26617456	transposon_fragment	Parent=AT1TE87140	+	TAIR10	619
PE_000442	chr1	26789236	26790160	gene	ID=AT1G71015;Note=protein_coding_gene;Name=AT1G71015	-	TAIR10	924
PE_000442	chr1	26790597	26793175	gene	ID=AT1G71020;Note=protein_coding_gene;Name=AT1G71020	-	TAIR10	1362
PE_000442	chr1	26782839	26788970	gene	ID=AT1G71010;Note=protein_coding_gene;Name=AT1G71010	+	TAIR10	11
PE_000443	chr1	26838289	26841490	gene	ID=AT1G71210;Note=protein_coding_gene;Name=AT1G71210	-	TAIR10	1621
PE_000443	chr1	26835973	26837308	gene	ID=AT1G71200;Note=protein_coding_gene;Name=AT1G71200	-	TAIR10	398
PE_000444	chr1	26855430	26859741	gene	ID=AT1G71240;Note=protein_coding_gene;Name=AT1G71240	+	TAIR10	133
PE_000444	chr1	26860118	26861726	gene	ID=AT1G71250;Note=protein_coding_gene;Name=AT1G71250	+	TAIR10	1608
PE_000444	chr1	26861657	26863422	gene	ID=AT1G71260;Note=protein_coding_gene;Name=AT1G71260	-	TAIR10	951
PE_000445	chr1	26897005	26899434	gene	ID=AT1G71370;Note=protein_coding_gene;Name=AT1G71370	-	TAIR10	1233
PE_000445	chr1	26899784	26901789	gene	ID=AT1G71380;Note=protein_coding_gene;Name=AT1G71380	-	TAIR10	1417
PE_000446	chr1	26909835	26912597	gene	ID=AT1G71400;Note=protein_coding_gene;Name=AT1G71400	+	TAIR10	1595
PE_000446	chr1	26912726	26917712	gene	ID=AT1G71410;Note=protein_coding_gene;Name=AT1G71410	-	TAIR10	1276
PE_000447	chr1	26909835	26912597	gene	ID=AT1G71400;Note=protein_coding_gene;Name=AT1G71400	+	TAIR10	1032
PE_000447	chr1	26912726	26917712	gene	ID=AT1G71410;Note=protein_coding_gene;Name=AT1G71410	-	TAIR10	1839
PE_000448	chr1	26939562	26942952	gene	ID=AT1G71528;Note=other_RNA;Name=AT1G71528	-	TAIR10	1407
PE_000448	chr1	26939562	26942952	ncRNA	ID=AT1G71528.1;Parent=AT1G71528;Name=AT1G71528.1;Index=1	-	TAIR10	1407
PE_000448	chr1	26939567	26942952	gene	ID=AT1G71530;Note=protein_coding_gene;Name=AT1G71530	+	TAIR10	1407
PE_000448	chr1	26943121	26943622	transposable_element	ID=AT1TE88165;Name=AT1TE88165;Alias=ATREP3	-	TAIR10	501
PE_000448	chr1	26943121	26943622	transposon_fragment	Parent=AT1TE88165	-	TAIR10	501
PE_000449	chr1	26987775	26989199	gene	ID=AT1G71750;Note=protein_coding_gene;Name=AT1G71750	-	TAIR10	1424
PE_000449	chr1	26989350	26990617	gene	ID=AT1G71760;Note=protein_coding_gene;Name=AT1G71760	+	TAIR10	1267
PE_000449	chr1	26990525	26994259	gene	ID=AT1G71770;Note=protein_coding_gene;Name=AT1G71770	-	TAIR10	203
PE_000450	chr1	27002414	27008176	gene	ID=AT1G71810;Note=protein_coding_gene;Name=AT1G71810	-	TAIR10	1374
PE_000450	chr1	26999452	27002342	gene	ID=AT1G71800;Note=protein_coding_gene;Name=AT1G71800	+	TAIR10	1554
PE_000451	chr1	27118447	27119011	gene	ID=AT1G72060;Note=protein_coding_gene;Name=AT1G72060	+	TAIR10	476
PE_000451	chr1	27118621	27119708	gene	ID=AT1G72070;Note=protein_coding_gene;Name=AT1G72070	-	TAIR10	302
PE_000451	chr1	27117491	27118195	transposable_element	ID=AT1TE88730;Name=AT1TE88730;Alias=TAG3N1	-	TAIR10	704
PE_000451	chr1	27117491	27118195	transposon_fragment	Parent=AT1TE88730	-	TAIR10	704
PE_000451	chr1	27115024	27117470	gene	ID=AT1G72050;Note=protein_coding_gene;Name=AT1G72050	+	TAIR10	1547
PE_000452	chr1	27123567	27126895	gene	ID=AT1G72090;Note=protein_coding_gene;Name=AT1G72090	+	TAIR10	1015
PE_000452	chr1	27127212	27128978	gene	ID=AT1G72100;Note=protein_coding_gene;Name=AT1G72100	+	TAIR10	1668
PE_000453	chr1	27129025	27131469	gene	ID=AT1G72110;Note=protein_coding_gene;Name=AT1G72110	-	TAIR10	1119
PE_000453	chr1	27132097	27133985	gene	ID=AT1G72120;Note=protein_coding_gene;Name=AT1G72120	+	TAIR10	1253
PE_000454	chr1	27215789	27216791	gene	ID=AT1G72290;Note=protein_coding_gene;Name=AT1G72290	+	TAIR10	1002
PE_000454	chr1	27217477	27221123	gene	ID=AT1G72300;Note=protein_coding_gene;Name=AT1G72300	-	TAIR10	1104
PE_000454	chr1	27216702	27216884	transposable_element	ID=AT1TE89060;Name=AT1TE89060;Alias=ATCOPIA66	+	TAIR10	182
PE_000454	chr1	27216702	27216884	transposon_fragment	Parent=AT1TE89060	+	TAIR10	182
PE_000455	chr1	27319688	27324037	gene	ID=AT1G72550;Note=protein_coding_gene;Name=AT1G72550	-	TAIR10	1188
PE_000455	chr1	27324389	27330031	gene	ID=AT1G72560;Note=protein_coding_gene;Name=AT1G72560	-	TAIR10	1460
PE_000456	chr1	27349467	27353742	gene	ID=AT1G72650;Note=protein_coding_gene;Name=AT1G72650	+	TAIR10	1504
PE_000456	chr1	27353791	27356670	gene	ID=AT1G72660;Note=protein_coding_gene;Name=AT1G72660	+	TAIR10	1447
PE_000457	chr1	27402878	27404673	gene	ID=AT1G72820;Note=protein_coding_gene;Name=AT1G72820	+	TAIR10	1334
PE_000457	chr1	27405456	27407969	gene	ID=AT1G72830;Note=protein_coding_gene;Name=AT1G72830	-	TAIR10	883
PE_000458	chr1	27528052	27530952	gene	ID=AT1G73210;Note=protein_coding_gene;Name=AT1G73210	-	TAIR10	1348
PE_000458	chr1	27526711	27528093	transposable_element	ID=AT1TE90070;Name=AT1TE90070;Alias=ATREP3	+	TAIR10	1382
PE_000458	chr1	27526711	27528093	transposon_fragment	Parent=AT1TE90070	+	TAIR10	1382
PE_000458	chr1	27523454	27526718	gene	ID=AT1G73200;Note=protein_coding_gene;Name=AT1G73200	-	TAIR10	318
PE_000459	chr1	27528052	27530952	gene	ID=AT1G73210;Note=protein_coding_gene;Name=AT1G73210	-	TAIR10	2429
PE_000459	chr1	27531284	27531434	transposable_element	ID=AT1TE90080;Name=AT1TE90080;Alias=HELITRONY1D	-	TAIR10	150
PE_000459	chr1	27531284	27531434	transposon_fragment	Parent=AT1TE90080	-	TAIR10	150
PE_000459	chr1	27531435	27531540	transposable_element	ID=AT1TE90085;Name=AT1TE90085;Alias=VANDAL17	+	TAIR10	88
PE_000459	chr1	27531435	27531540	transposon_fragment	Parent=AT1TE90085	+	TAIR10	88
PE_000460	chr1	27570012	27571314	transposable_element	ID=AT1TE90225;Name=AT1TE90225;Alias=ATREP10D	+	TAIR10	519
PE_000460	chr1	27570012	27571314	transposon_fragment	Parent=AT1TE90225	+	TAIR10	519
PE_000460	chr1	27572959	27573057	transposable_element	ID=AT1TE90230;Name=AT1TE90230;Alias=ATENSPM2	+	TAIR10	98
PE_000460	chr1	27572959	27573057	transposon_fragment	Parent=AT1TE90230	+	TAIR10	98
PE_000460	chr1	27573116	27575419	gene	ID=AT1G73340;Note=protein_coding_gene;Name=AT1G73340	+	TAIR10	679
PE_000461	chr1	27654841	27655518	gene	ID=AT1G73580;Note=protein_coding_gene;Name=AT1G73580	+	TAIR10	677
PE_000462	chr1	27674288	27674953	gene	ID=AT1G73603;Note=protein_coding_gene;Name=AT1G73603	+	TAIR10	665
PE_000462	chr1	27674200	27674223	transposable_element	ID=AT1TE90550;Name=AT1TE90550;Alias=BRODYAGA1	+	TAIR10	23
PE_000462	chr1	27674200	27674223	transposon_fragment	Parent=AT1TE90550	+	TAIR10	23
PE_000462	chr1	27669152	27673572	gene	ID=AT1G73600;Note=protein_coding_gene;Name=AT1G73600	+	TAIR10	1380
PE_000462	chr1	27670626	27673569	gene	ID=AT1G73602;Note=protein_coding_gene;Name=AT1G73602	+	TAIR10	1377
PE_000463	chr1	27686992	27688127	gene	ID=AT1G73640;Note=protein_coding_gene;Name=AT1G73640	+	TAIR10	1135
PE_000463	chr1	27688123	27690307	gene	ID=AT1G73650;Note=protein_coding_gene;Name=AT1G73650	-	TAIR10	1578
PE_000464	chr1	27717380	27719648	gene	ID=AT1G73700;Note=protein_coding_gene;Name=AT1G73700	-	TAIR10	1300
PE_000464	chr1	27721190	27724165	gene	ID=AT1G73710;Note=protein_coding_gene;Name=AT1G73710	+	TAIR10	158
PE_000465	chr1	27725002	27729931	gene	ID=AT1G73720;Note=protein_coding_gene;Name=AT1G73720	+	TAIR10	1482
PE_000465	chr1	27730031	27732514	gene	ID=AT1G73730;Note=protein_coding_gene;Name=AT1G73730	-	TAIR10	1418
PE_000466	chr1	27730031	27732514	gene	ID=AT1G73730;Note=protein_coding_gene;Name=AT1G73730	-	TAIR10	1801
PE_000466	chr1	27733204	27733527	transposable_element	ID=AT1TE90760;Name=AT1TE90760;Alias=ATHILA7	+	TAIR10	323
PE_000466	chr1	27733204	27733527	transposon_fragment	Parent=AT1TE90760	+	TAIR10	323
PE_000467	chr1	27730031	27732514	gene	ID=AT1G73730;Note=protein_coding_gene;Name=AT1G73730	-	TAIR10	1413
PE_000467	chr1	27733204	27733527	transposable_element	ID=AT1TE90760;Name=AT1TE90760;Alias=ATHILA7	+	TAIR10	323
PE_000467	chr1	27733204	27733527	transposon_fragment	Parent=AT1TE90760	+	TAIR10	323
PE_000468	chr1	27839184	27841939	gene	ID=AT1G74030;Note=protein_coding_gene;Name=AT1G74030	-	TAIR10	1449
PE_000469	chr1	27880528	27883626	gene	ID=AT1G74150;Note=protein_coding_gene;Name=AT1G74150	+	TAIR10	1141
PE_000470	chr1	27914699	27917083	gene	ID=AT1G74230;Note=protein_coding_gene;Name=AT1G74230	+	TAIR10	1340
PE_000470	chr1	27917396	27920139	gene	ID=AT1G74240;Note=protein_coding_gene;Name=AT1G74240	+	TAIR10	1347
PE_000471	chr1	28013309	28015049	gene	ID=AT1G74540;Note=protein_coding_gene;Name=AT1G74540	+	TAIR10	276
PE_000471	chr1	28014585	28015482	gene	ID=AT1G74545;Note=other_RNA;Name=AT1G74545	-	TAIR10	709
PE_000471	chr1	28014585	28015482	ncRNA	ID=AT1G74545.1;Parent=AT1G74545;Name=AT1G74545.1;Index=1	-	TAIR10	709
PE_000471	chr1	28017584	28020049	gene	ID=AT1G74560;Note=protein_coding_gene;Name=AT1G74560	-	TAIR10	189
PE_000471	chr1	28016045	28017711	gene	ID=AT1G74550;Note=protein_coding_gene;Name=AT1G74550	+	TAIR10	1666
PE_000472	chr1	28095815	28098185	gene	ID=AT1G74780;Note=protein_coding_gene;Name=AT1G74780	+	TAIR10	1043
PE_000472	chr1	28098765	28101896	gene	ID=AT1G74790;Note=protein_coding_gene;Name=AT1G74790	+	TAIR10	1377
PE_000473	chr1	28123319	28125882	gene	ID=AT1G74860;Note=protein_coding_gene;Name=AT1G74860	+	TAIR10	529
PE_000473	chr1	28126928	28128463	gene	ID=AT1G74870;Note=protein_coding_gene;Name=AT1G74870	+	TAIR10	1425
PE_000474	chr1	28223869	28228975	gene	ID=AT1G75210;Note=protein_coding_gene;Name=AT1G75210	+	TAIR10	1769
PE_000474	chr1	28229157	28232831	gene	ID=AT1G75220;Note=protein_coding_gene;Name=AT1G75220	-	TAIR10	1049
PE_000475	chr1	28415203	28416852	gene	ID=AT1G75670;Note=protein_coding_gene;Name=AT1G75670	-	TAIR10	938
PE_000475	chr1	28408147	28415117	gene	ID=AT1G75660;Note=protein_coding_gene;Name=AT1G75660	+	TAIR10	1976
PE_000476	chr1	28533798	28537194	gene	ID=AT1G76030;Note=protein_coding_gene;Name=AT1G76030	+	TAIR10	1632
PE_000476	chr1	28537673	28540637	gene	ID=AT1G76040;Note=protein_coding_gene;Name=AT1G76040	+	TAIR10	889
PE_000477	chr1	28639577	28643086	gene	ID=AT1G76350;Note=protein_coding_gene;Name=AT1G76350	+	TAIR10	1320
PE_000477	chr1	28643038	28646712	gene	ID=AT1G76360;Note=protein_coding_gene;Name=AT1G76360	-	TAIR10	1728
PE_000478	chr1	28722702	28727006	gene	ID=AT1G76550;Note=protein_coding_gene;Name=AT1G76550	-	TAIR10	1368
PE_000478	chr1	28720328	28722521	gene	ID=AT1G76540;Note=protein_coding_gene;Name=AT1G76540	-	TAIR10	1451
PE_000479	chr1	28811040	28811721	gene	ID=AT1G76750;Note=protein_coding_gene;Name=AT1G76750	+	TAIR10	9
PE_000479	chr1	28811685	28813070	gene	ID=AT1G76760;Note=protein_coding_gene;Name=AT1G76760	-	TAIR10	1358
PE_000479	chr1	28813569	28814378	gene	ID=AT1G76770;Note=protein_coding_gene;Name=AT1G76770	+	TAIR10	809
PE_000479	chr1	28813977	28814284	transposable_element	ID=AT1TE94270;Name=AT1TE94270;Alias=ATENSPM1A	-	TAIR10	307
PE_000479	chr1	28813977	28814284	transposon_fragment	Parent=AT1TE94270	-	TAIR10	307
PE_000480	chr1	28815350	28815416	transposable_element	ID=AT1TE94275;Name=AT1TE94275;Alias=ATREP11	-	TAIR10	66
PE_000480	chr1	28815350	28815416	transposon_fragment	Parent=AT1TE94275	-	TAIR10	66
PE_000480	chr1	28817138	28817562	transposable_element	ID=AT1TE94280;Name=AT1TE94280;Alias=VANDAL17	-	TAIR10	424
PE_000480	chr1	28817138	28817562	transposon_fragment	Parent=AT1TE94280	-	TAIR10	424
PE_000480	chr1	28816641	28822256	gene	ID=AT1G76780;Note=protein_coding_gene;Name=AT1G76780	+	TAIR10	982
PE_000481	chr1	28829308	28830277	gene	ID=AT1G76800;Note=protein_coding_gene;Name=AT1G76800	+	TAIR10	875
PE_000481	chr1	28831003	28836586	gene	ID=AT1G76810;Note=protein_coding_gene;Name=AT1G76810	-	TAIR10	1399
PE_000482	chr1	28944843	28947031	gene	ID=AT1G77020;Note=protein_coding_gene;Name=AT1G77020	-	TAIR10	896
PE_000482	chr1	28947554	28947625	gene	ID=AT1G77040;Note=tRNA;Name=AT1G77040	-	TAIR10	71
PE_000482	chr1	28947554	28947625	tRNA	ID=AT1G77040.1;Parent=AT1G77040;Name=AT1G77040.1;Index=1	-	TAIR10	71
PE_000482	chr1	28947743	28951599	gene	ID=AT1G77030;Note=protein_coding_gene;Name=AT1G77030	-	TAIR10	1392
PE_000483	chr1	28984025	28987983	gene	ID=AT1G77140;Note=protein_coding_gene;Name=AT1G77140	+	TAIR10	1784
PE_000484	chr1	29008939	29012096	gene	ID=AT1G77210;Note=protein_coding_gene;Name=AT1G77210	-	TAIR10	2436
PE_000485	chr1	29051505	29056339	gene	ID=AT1G77310;Note=protein_coding_gene;Name=AT1G77310	+	TAIR10	1507
PE_000485	chr1	29056532	29062966	gene	ID=AT1G77320;Note=protein_coding_gene;Name=AT1G77320	+	TAIR10	1300
PE_000486	chr1	29214445	29215564	gene	ID=AT1G77730;Note=protein_coding_gene;Name=AT1G77730	+	TAIR10	1119
PE_000486	chr1	29210521	29214087	gene	ID=AT1G77720;Note=protein_coding_gene;Name=AT1G77720	+	TAIR10	1432
PE_000487	chr1	29268487	29270586	gene	ID=AT1G77840;Note=protein_coding_gene;Name=AT1G77840	+	TAIR10	1362
PE_000488	chr1	29272313	29275419	gene	ID=AT1G77850;Note=protein_coding_gene;Name=AT1G77850	+	TAIR10	1176
PE_000488	chr1	29277166	29278518	gene	ID=AT1G77855;Note=protein_coding_gene;Name=AT1G77855	-	TAIR10	77
PE_000489	chr1	29282643	29284458	gene	ID=AT1G77860;Note=protein_coding_gene;Name=AT1G77860	-	TAIR10	851
PE_000490	chr1	29355022	29358993	gene	ID=AT1G78070;Note=protein_coding_gene;Name=AT1G78070	+	TAIR10	1752
PE_000491	chr1	29601253	29604557	gene	ID=AT1G78710;Note=protein_coding_gene;Name=AT1G78710	+	TAIR10	772
PE_000491	chr1	29604582	29605310	transposable_element	ID=AT1TE96830;Name=AT1TE96830;Alias=META1	-	TAIR10	728
PE_000491	chr1	29604582	29605310	transposon_fragment	Parent=AT1TE96830	-	TAIR10	728
PE_000491	chr1	29605629	29607510	gene	ID=AT1G78720;Note=protein_coding_gene;Name=AT1G78720	+	TAIR10	1156
PE_000492	chr1	29689153	29694255	gene	ID=AT1G78955;Note=protein_coding_gene;Name=AT1G78955	-	TAIR10	500
PE_000492	chr1	29684432	29688673	gene	ID=AT1G78950;Note=protein_coding_gene;Name=AT1G78950	-	TAIR10	2020
PE_000493	chr1	29804123	29804195	gene	ID=AT1G79240;Note=tRNA;Name=AT1G79240	+	TAIR10	72
PE_000493	chr1	29804123	29804195	tRNA	ID=AT1G79240.1;Parent=AT1G79240;Name=AT1G79240.1;Index=1	+	TAIR10	72
PE_000493	chr1	29804735	29809514	pseudogene	ID=AT1G79245;Note=pseudogene;Name=AT1G79245	-	TAIR10	1096
PE_000493	chr1	29804735	29809514	pseudogenic_transcript	ID=AT1G79245.1;Parent=AT1G79245;Name=AT1G79245.1;Index=1	-	TAIR10	1096
PE_000493	chr1	29804735	29809514	pseudogenic_exon	Parent=AT1G79245.1	-	TAIR10	1096
PE_000493	chr1	29800693	29803939	gene	ID=AT1G79230;Note=protein_coding_gene;Name=AT1G79230	+	TAIR10	1108
PE_000494	chr1	29819142	29833016	gene	ID=AT1G79280;Note=protein_coding_gene;Name=AT1G79280	-	TAIR10	1210
PE_000494	chr1	29815506	29819104	gene	ID=AT1G79270;Note=protein_coding_gene;Name=AT1G79270	+	TAIR10	1752
PE_000495	chr1	29819142	29833016	gene	ID=AT1G79280;Note=protein_coding_gene;Name=AT1G79280	-	TAIR10	1571
PE_000495	chr1	29815506	29819104	gene	ID=AT1G79270;Note=protein_coding_gene;Name=AT1G79270	+	TAIR10	1391
PE_000496	chr1	29903420	29909437	gene	ID=AT1G79500;Note=protein_coding_gene;Name=AT1G79500	+	TAIR10	3000
PE_000497	chr1	29946237	29948774	gene	ID=AT1G79590;Note=protein_coding_gene;Name=AT1G79590	+	TAIR10	1713
PE_000497	chr1	29949925	29952690	gene	ID=AT1G79600;Note=protein_coding_gene;Name=AT1G79600	-	TAIR10	136
PE_000498	chr1	29946237	29948774	gene	ID=AT1G79590;Note=protein_coding_gene;Name=AT1G79590	+	TAIR10	902
PE_000498	chr1	29949925	29952690	gene	ID=AT1G79600;Note=protein_coding_gene;Name=AT1G79600	-	TAIR10	947
PE_000499	chr1	29946237	29948774	gene	ID=AT1G79590;Note=protein_coding_gene;Name=AT1G79590	+	TAIR10	385
PE_000499	chr1	29949925	29952690	gene	ID=AT1G79600;Note=protein_coding_gene;Name=AT1G79600	-	TAIR10	1464
PE_000500	chr1	29957562	29962305	gene	ID=AT1G79620;Note=protein_coding_gene;Name=AT1G79620	-	TAIR10	1185
PE_000500	chr1	29962645	29965795	gene	ID=AT1G79630;Note=protein_coding_gene;Name=AT1G79630	-	TAIR10	1475
PE_000501	chr1	29966711	29971600	gene	ID=AT1G79640;Note=protein_coding_gene;Name=AT1G79640	-	TAIR10	1167
PE_000501	chr1	29972108	29975281	gene	ID=AT1G79650;Note=protein_coding_gene;Name=AT1G79650	-	TAIR10	1325
PE_000502	chr1	30022260	30027443	gene	ID=AT1G79820;Note=protein_coding_gene;Name=AT1G79820	-	TAIR10	1289
PE_000502	chr1	30027670	30033901	gene	ID=AT1G79830;Note=protein_coding_gene;Name=AT1G79830	-	TAIR10	1484
PE_000503	chr1	30052297	30053936	gene	ID=AT1G79900;Note=protein_coding_gene;Name=AT1G79900	-	TAIR10	1308
PE_000503	chr1	30054884	30057170	gene	ID=AT1G79910;Note=protein_coding_gene;Name=AT1G79910	+	TAIR10	744
PE_000504	chr1	30100473	30103899	transposable_element_gene	ID=AT1G80020;Note=transposable_element_gene;Name=AT1G80020;Derives_from=AT1TE98440	-	TAIR10	1092
PE_000504	chr1	30100473	30103899	transposable_element	ID=AT1TE98440;Name=AT1TE98440;Alias=Unassigned	-	TAIR10	1092
PE_000504	chr1	30100473	30103899	transposon_fragment	Parent=AT1TE98440	-	TAIR10	1092
PE_000504	chr1	30097401	30099846	gene	ID=AT1G80010;Note=protein_coding_gene;Name=AT1G80010	+	TAIR10	1281
PE_000505	chr1	30100473	30103899	transposable_element_gene	ID=AT1G80020;Note=transposable_element_gene;Name=AT1G80020;Derives_from=AT1TE98440	-	TAIR10	1421
PE_000505	chr1	30100473	30103899	transposable_element	ID=AT1TE98440;Name=AT1TE98440;Alias=Unassigned	-	TAIR10	1421
PE_000505	chr1	30100473	30103899	transposon_fragment	Parent=AT1TE98440	-	TAIR10	1421
PE_000505	chr1	30097401	30099846	gene	ID=AT1G80010;Note=protein_coding_gene;Name=AT1G80010	+	TAIR10	952
PE_000506	chr1	30287763	30290298	gene	ID=AT1G80560;Note=protein_coding_gene;Name=AT1G80560	+	TAIR10	1505
PE_000506	chr1	30290325	30292420	gene	ID=AT1G80570;Note=protein_coding_gene;Name=AT1G80570	+	TAIR10	1468
PE_000507	chr1	30290325	30292420	gene	ID=AT1G80570;Note=protein_coding_gene;Name=AT1G80570	+	TAIR10	1400
PE_000507	chr1	30293558	30294328	gene	ID=AT1G80580;Note=protein_coding_gene;Name=AT1G80580	+	TAIR10	462
PE_000508	chr1	30290325	30292420	gene	ID=AT1G80570;Note=protein_coding_gene;Name=AT1G80570	+	TAIR10	953
PE_000508	chr1	30293558	30294328	gene	ID=AT1G80580;Note=protein_coding_gene;Name=AT1G80580	+	TAIR10	770
PE_000509	chr1	30316026	30320197	gene	ID=AT1G80660;Note=protein_coding_gene;Name=AT1G80660	-	TAIR10	1385
PE_000509	chr1	30320576	30323780	gene	ID=AT1G80670;Note=protein_coding_gene;Name=AT1G80670	-	TAIR10	1236
PE_000510	chr1	30316026	30320197	gene	ID=AT1G80660;Note=protein_coding_gene;Name=AT1G80660	-	TAIR10	1015
PE_000510	chr1	30320576	30323780	gene	ID=AT1G80670;Note=protein_coding_gene;Name=AT1G80670	-	TAIR10	1606
PE_000511	chr1	30329068	30330803	gene	ID=AT1G80690;Note=protein_coding_gene;Name=AT1G80690	-	TAIR10	1386
PE_000511	chr1	30324008	30328769	gene	ID=AT1G80680;Note=protein_coding_gene;Name=AT1G80680	+	TAIR10	1315
PE_000512	chr1	30342394	30347048	gene	ID=AT1G80740;Note=protein_coding_gene;Name=AT1G80740	+	TAIR10	1140
PE_000513	chr1	30347426	30348436	gene	ID=AT1G80745;Note=protein_coding_gene;Name=AT1G80745	+	TAIR10	800
PE_000513	chr1	30342394	30347048	gene	ID=AT1G80740;Note=protein_coding_gene;Name=AT1G80740	+	TAIR10	1822
PE_000514	chr1	30359723	30363307	gene	ID=AT1G80790;Note=protein_coding_gene;Name=AT1G80790	+	TAIR10	1471
PE_000514	chr1	30364013	30364310	pseudogene	ID=AT1G80800;Note=pseudogene;Name=AT1G80800	+	TAIR10	297
PE_000514	chr1	30364013	30364310	pseudogenic_transcript	ID=AT1G80800.1;Parent=AT1G80800;Name=AT1G80800.1;Index=1	+	TAIR10	297
PE_000514	chr1	30364013	30364310	pseudogenic_exon	Parent=AT1G80800.1	+	TAIR10	297
PE_000515	chr1	30365287	30368898	gene	ID=AT1G80810;Note=protein_coding_gene;Name=AT1G80810	+	TAIR10	1136
PE_000515	chr1	30370572	30372670	gene	ID=AT1G80820;Note=protein_coding_gene;Name=AT1G80820	+	TAIR10	190
PE_000515	chr1	30368411	30368888	transposable_element	ID=AT1TE99300;Name=AT1TE99300;Alias=VANDAL17	-	TAIR10	477
PE_000515	chr1	30368411	30368888	transposon_fragment	Parent=AT1TE99300	-	TAIR10	477
PE_000516	chr1	30365287	30368898	gene	ID=AT1G80810;Note=protein_coding_gene;Name=AT1G80810	+	TAIR10	567
PE_000516	chr1	30370572	30372670	gene	ID=AT1G80820;Note=protein_coding_gene;Name=AT1G80820	+	TAIR10	759
PE_000516	chr1	30368411	30368888	transposable_element	ID=AT1TE99300;Name=AT1TE99300;Alias=VANDAL17	-	TAIR10	477
PE_000516	chr1	30368411	30368888	transposon_fragment	Parent=AT1TE99300	-	TAIR10	477
PE_000517	chr2	123276	126466	gene	ID=AT2G01220;Note=protein_coding_gene;Name=AT2G01220	+	TAIR10	1198
PE_000517	chr2	126901	126920	transposable_element	ID=AT2TE00420;Name=AT2TE00420;Alias=ATREP11	+	TAIR10	19
PE_000517	chr2	126901	126920	transposon_fragment	Parent=AT2TE00420	+	TAIR10	19
PE_000517	chr2	126921	128152	transposable_element	ID=AT2TE00425;Name=AT2TE00425;Alias=HELITRONY1B	+	TAIR10	1231
PE_000517	chr2	126921	128050	transposon_fragment	Parent=AT2TE00425	+	TAIR10	1129
PE_000517	chr2	128051	128152	transposon_fragment	Parent=AT2TE00425	+	TAIR10	101
PE_000518	chr2	142498	144524	gene	ID=AT2G01275;Note=protein_coding_gene;Name=AT2G01275	-	TAIR10	1156
PE_000518	chr2	143227	143374	transposable_element	ID=AT2TE00500;Name=AT2TE00500;Alias=RathE3_cons	+	TAIR10	6
PE_000518	chr2	143227	143374	transposon_fragment	Parent=AT2TE00500	+	TAIR10	6
PE_000518	chr2	144209	144292	transposable_element	ID=AT2TE00505;Name=AT2TE00505;Alias=ATSINE4	+	TAIR10	83
PE_000518	chr2	144209	144292	transposon_fragment	Parent=AT2TE00505	+	TAIR10	83
PE_000518	chr2	145676	149394	gene	ID=AT2G01280;Note=protein_coding_gene;Name=AT2G01280	+	TAIR10	692
PE_000519	chr2	142498	144524	gene	ID=AT2G01275;Note=protein_coding_gene;Name=AT2G01275	-	TAIR10	677
PE_000519	chr2	144209	144292	transposable_element	ID=AT2TE00505;Name=AT2TE00505;Alias=ATSINE4	+	TAIR10	83
PE_000519	chr2	144209	144292	transposon_fragment	Parent=AT2TE00505	+	TAIR10	83
PE_000519	chr2	145676	149394	gene	ID=AT2G01280;Note=protein_coding_gene;Name=AT2G01280	+	TAIR10	1171
PE_000520	chr2	154131	158182	gene	ID=AT2G01320;Note=protein_coding_gene;Name=AT2G01320	-	TAIR10	1516
PE_000520	chr2	152982	153199	transposable_element	ID=AT2TE00540;Name=AT2TE00540;Alias=ATMU1	-	TAIR10	217
PE_000520	chr2	152982	153199	transposon_fragment	Parent=AT2TE00540	-	TAIR10	217
PE_000521	chr2	268818	272610	gene	ID=AT2G01600;Note=protein_coding_gene;Name=AT2G01600	+	TAIR10	1670
PE_000521	chr2	273917	274820	gene	ID=AT2G01610;Note=protein_coding_gene;Name=AT2G01610	-	TAIR10	23
PE_000522	chr2	498025	499559	gene	ID=AT2G02061;Note=protein_coding_gene;Name=AT2G02061	+	TAIR10	1235
PE_000522	chr2	499870	499896	transposable_element	ID=AT2TE02150;Name=AT2TE02150;Alias=ATREP10A	-	TAIR10	26
PE_000522	chr2	499870	499896	transposon_fragment	Parent=AT2TE02150	-	TAIR10	26
PE_000522	chr2	499897	499934	transposable_element	ID=AT2TE02155;Name=AT2TE02155;Alias=META1	+	TAIR10	37
PE_000522	chr2	499897	499934	transposon_fragment	Parent=AT2TE02155	+	TAIR10	37
PE_000522	chr2	499935	503974	transposable_element	ID=AT2TE02160;Name=AT2TE02160;Alias=ATREP3	+	TAIR10	1389
PE_000522	chr2	499935	503974	transposon_fragment	Parent=AT2TE02160	+	TAIR10	1389
PE_000523	chr2	594655	595852	gene	ID=AT2G02250;Note=protein_coding_gene;Name=AT2G02250	-	TAIR10	1197
PE_000523	chr2	596454	597760	transposable_element_gene	ID=AT2G02260;Note=transposable_element_gene;Name=AT2G02260;Derives_from=AT2TE02530	-	TAIR10	1008
PE_000523	chr2	596349	597748	transposable_element	ID=AT2TE02530;Name=AT2TE02530;Alias=ATLINEIII	-	TAIR10	1113
PE_000523	chr2	596349	597748	transposon_fragment	Parent=AT2TE02530	-	TAIR10	1113
PE_000524	chr2	652564	654915	gene	ID=AT2G02470;Note=protein_coding_gene;Name=AT2G02470	+	TAIR10	1083
PE_000524	chr2	654789	654873	transposable_element	ID=AT2TE02800;Name=AT2TE02800;Alias=ATREP15	-	TAIR10	84
PE_000524	chr2	654789	654873	transposon_fragment	Parent=AT2TE02800	-	TAIR10	84
PE_000524	chr2	656217	656728	transposable_element	ID=AT2TE02810;Name=AT2TE02810;Alias=ATREP10D	+	TAIR10	511
PE_000524	chr2	656217	656728	transposon_fragment	Parent=AT2TE02810	+	TAIR10	511
PE_000524	chr2	654874	660310	transposable_element	ID=AT2TE02805;Name=AT2TE02805;Alias=ATREP10D	-	TAIR10	1958
PE_000524	chr2	654874	656216	transposon_fragment	Parent=AT2TE02805	-	TAIR10	1342
PE_000525	chr2	775482	779786	gene	ID=AT2G02770;Note=protein_coding_gene;Name=AT2G02770	-	TAIR10	693
PE_000525	chr2	781847	784646	gene	ID=AT2G02780;Note=protein_coding_gene;Name=AT2G02780	-	TAIR10	246
PE_000526	chr2	843913	846616	gene	ID=AT2G02890;Note=protein_coding_gene;Name=AT2G02890	-	TAIR10	1272
PE_000526	chr2	846855	846927	gene	ID=AT2G02900;Note=tRNA;Name=AT2G02900	-	TAIR10	72
PE_000526	chr2	846855	846927	tRNA	ID=AT2G02900.1;Parent=AT2G02900;Name=AT2G02900.1;Index=1	-	TAIR10	72
PE_000526	chr2	847176	849598	gene	ID=AT2G02910;Note=protein_coding_gene;Name=AT2G02910	-	TAIR10	1168
PE_000526	chr2	846209	846558	transposable_element	ID=AT2TE03750;Name=AT2TE03750;Alias=ATCOPIA36	+	TAIR10	349
PE_000526	chr2	846209	846558	transposon_fragment	Parent=AT2TE03750	+	TAIR10	349
PE_000527	chr2	851164	852222	gene	ID=AT2G02930;Note=protein_coding_gene;Name=AT2G02930	-	TAIR10	1058
PE_000528	chr2	905619	909070	gene	ID=AT2G03070;Note=protein_coding_gene;Name=AT2G03070	+	TAIR10	1603
PE_000528	chr2	909197	909704	transposable_element	ID=AT2TE04080;Name=AT2TE04080;Alias=HELITRON4	+	TAIR10	507
PE_000528	chr2	909197	909704	transposon_fragment	Parent=AT2TE04080	+	TAIR10	507
PE_000528	chr2	909734	914341	transposable_element	ID=AT2TE04085;Name=AT2TE04085;Alias=META1	+	TAIR10	733
PE_000528	chr2	909734	911103	transposon_fragment	Parent=AT2TE04085	+	TAIR10	733
PE_000529	chr2	932541	933323	transposon_fragment	Parent=AT2TE04145	+	TAIR10	90
PE_000529	chr2	933324	933516	transposable_element	ID=AT2TE04150;Name=AT2TE04150;Alias=ATENSPM2	-	TAIR10	192
PE_000529	chr2	933324	933516	transposon_fragment	Parent=AT2TE04150	-	TAIR10	192
PE_000529	chr2	933517	933803	transposable_element	ID=AT2TE04155;Name=AT2TE04155;Alias=VANDAL22	-	TAIR10	286
PE_000529	chr2	933517	933803	transposon_fragment	Parent=AT2TE04155	-	TAIR10	286
PE_000529	chr2	935336	936639	gene	ID=AT2G03110;Note=protein_coding_gene;Name=AT2G03110	+	TAIR10	897
PE_000529	chr2	934043	934254	transposable_element	ID=AT2TE04160;Name=AT2TE04160;Alias=ATREP17	-	TAIR10	211
PE_000529	chr2	934043	934254	transposon_fragment	Parent=AT2TE04160	-	TAIR10	211
PE_000529	chr2	932541	933984	transposable_element	ID=AT2TE04145;Name=AT2TE04145;Alias=ATREP15	+	TAIR10	751
PE_000529	chr2	933804	933984	transposon_fragment	Parent=AT2TE04145	+	TAIR10	180
PE_000530	chr2	1181537	1183703	gene	ID=AT2G03880;Note=protein_coding_gene;Name=AT2G03880	+	TAIR10	1346
PE_000530	chr2	1183684	1183911	transposable_element	ID=AT2TE05340;Name=AT2TE05340;Alias=ATREP11	-	TAIR10	227
PE_000530	chr2	1183684	1183911	transposon_fragment	Parent=AT2TE05340	-	TAIR10	227
PE_000530	chr2	1183912	1184425	transposable_element	ID=AT2TE05345;Name=AT2TE05345;Alias=BRODYAGA2	+	TAIR10	513
PE_000530	chr2	1183912	1184425	transposon_fragment	Parent=AT2TE05345	+	TAIR10	513
PE_000530	chr2	1184426	1184445	transposable_element	ID=AT2TE05350;Name=AT2TE05350;Alias=VANDALNX2	+	TAIR10	19
PE_000530	chr2	1184426	1184445	transposon_fragment	Parent=AT2TE05350	+	TAIR10	19
PE_000531	chr2	1376890	1379130	gene	ID=AT2G04100;Note=protein_coding_gene;Name=AT2G04100	-	TAIR10	1466
PE_000531	chr2	1379151	1379194	transposable_element	ID=AT2TE06310;Name=AT2TE06310;Alias=ATREP19	-	TAIR10	43
PE_000531	chr2	1379151	1379194	transposon_fragment	Parent=AT2TE06310	-	TAIR10	43
PE_000531	chr2	1379195	1379973	transposable_element	ID=AT2TE06315;Name=AT2TE06315;Alias=ATREP10B	-	TAIR10	778
PE_000531	chr2	1379195	1379973	transposon_fragment	Parent=AT2TE06315	-	TAIR10	778
PE_000531	chr2	1379974	1379999	transposable_element	ID=AT2TE06320;Name=AT2TE06320;Alias=HELITRONY3	+	TAIR10	25
PE_000531	chr2	1379974	1379999	transposon_fragment	Parent=AT2TE06320	+	TAIR10	25
PE_000531	chr2	1380152	1380543	transposable_element	ID=AT2TE06325;Name=AT2TE06325;Alias=ATLINE1A	+	TAIR10	391
PE_000531	chr2	1380152	1380543	transposon_fragment	Parent=AT2TE06325	+	TAIR10	391
PE_000531	chr2	1380606	1381291	transposable_element	ID=AT2TE06330;Name=AT2TE06330;Alias=ATN9_1	-	TAIR10	58
PE_000531	chr2	1380606	1381291	transposon_fragment	Parent=AT2TE06330	-	TAIR10	58
PE_000532	chr2	1608076	1609758	transposable_element_gene	ID=AT2G04600;Note=transposable_element_gene;Name=AT2G04600	-	TAIR10	694
PE_000532	chr2	1609935	1610372	pseudogene	ID=AT2G04610;Note=pseudogene;Name=AT2G04610	+	TAIR10	437
PE_000532	chr2	1609935	1610372	pseudogenic_transcript	ID=AT2G04610.1;Parent=AT2G04610;Name=AT2G04610.1;Index=1	+	TAIR10	437
PE_000532	chr2	1609935	1610372	pseudogenic_exon	Parent=AT2G04610.1	+	TAIR10	437
PE_000532	chr2	1610506	1612902	gene	ID=AT2G04620;Note=protein_coding_gene;Name=AT2G04620	-	TAIR10	1558
PE_000532	chr2	1607837	1609415	transposable_element	ID=AT2TE07425;Name=AT2TE07425;Alias=ATGP5	-	TAIR10	351
PE_000532	chr2	1608560	1609415	transposon_fragment	Parent=AT2TE07425	-	TAIR10	351
PE_000532	chr2	1609472	1609621	transposable_element	ID=AT2TE07430;Name=AT2TE07430;Alias=ATCOPIA43	-	TAIR10	149
PE_000532	chr2	1609472	1609621	transposon_fragment	Parent=AT2TE07430	-	TAIR10	149
PE_000532	chr2	1609622	1609642	transposable_element	ID=AT2TE07435;Name=AT2TE07435;Alias=ATCOPIA43	-	TAIR10	20
PE_000532	chr2	1609622	1609642	transposon_fragment	Parent=AT2TE07435	-	TAIR10	20
PE_000533	chr2	1918289	1920042	gene	ID=AT2G05260;Note=protein_coding_gene;Name=AT2G05260	+	TAIR10	1234
PE_000533	chr2	1920702	1921116	gene	ID=AT2G05270;Note=protein_coding_gene;Name=AT2G05270	-	TAIR10	414
PE_000533	chr2	1921241	1925279	transposable_element_gene	ID=AT2G05280;Note=transposable_element_gene;Name=AT2G05280;Derives_from=AT2TE08840	-	TAIR10	567
PE_000533	chr2	1921520	1925282	transposable_element	ID=AT2TE08840;Name=AT2TE08840;Alias=TA11	-	TAIR10	288
PE_000533	chr2	1921520	1925282	transposon_fragment	Parent=AT2TE08840	-	TAIR10	288
PE_000534	chr2	1931242	1933010	pseudogene	ID=AT2G05300;Note=pseudogene;Name=AT2G05300	+	TAIR10	1134
PE_000534	chr2	1931242	1933010	pseudogenic_transcript	ID=AT2G05300.1;Parent=AT2G05300;Name=AT2G05300.1;Index=1	+	TAIR10	1134
PE_000534	chr2	1931242	1932135	pseudogenic_exon	Parent=AT2G05300.1	+	TAIR10	893
PE_000534	chr2	1932207	1932347	pseudogenic_exon	Parent=AT2G05300.1	+	TAIR10	140
PE_000534	chr2	1928662	1929400	transposable_element	ID=AT2TE08860;Name=AT2TE08860;Alias=ATREP10D	+	TAIR10	24
PE_000534	chr2	1928662	1929400	transposon_fragment	Parent=AT2TE08860	+	TAIR10	24
PE_000534	chr2	1929412	1930752	transposable_element	ID=AT2TE08865;Name=AT2TE08865;Alias=HELITRONY1B	+	TAIR10	1340
PE_000534	chr2	1929412	1930752	transposon_fragment	Parent=AT2TE08865	+	TAIR10	1340
PE_000534	chr2	1930753	1930906	transposable_element	ID=AT2TE08870;Name=AT2TE08870;Alias=HELITRONY1A	+	TAIR10	153
PE_000534	chr2	1930753	1930906	transposon_fragment	Parent=AT2TE08870	+	TAIR10	153
PE_000535	chr2	2146547	2147042	pseudogene	ID=AT2G05715;Note=pseudogene;Name=AT2G05715	-	TAIR10	495
PE_000535	chr2	2146547	2147042	pseudogenic_transcript	ID=AT2G05715.1;Parent=AT2G05715;Name=AT2G05715.1;Index=1	-	TAIR10	495
PE_000535	chr2	2146824	2147042	pseudogenic_exon	Parent=AT2G05715.1	-	TAIR10	218
PE_000535	chr2	2146547	2146723	pseudogenic_exon	Parent=AT2G05715.1	-	TAIR10	176
PE_000535	chr2	2147192	2148215	gene	ID=AT2G05720;Note=protein_coding_gene;Name=AT2G05720	+	TAIR10	800
PE_000535	chr2	2141399	2146678	gene	ID=AT2G05710;Note=protein_coding_gene;Name=AT2G05710	+	TAIR10	1686
PE_000536	chr2	2180919	2183904	gene	ID=AT2G05760;Note=protein_coding_gene;Name=AT2G05760	+	TAIR10	1349
PE_000536	chr2	2180004	2180354	transposable_element	ID=AT2TE10030;Name=AT2TE10030;Alias=HELITRONY1A	-	TAIR10	350
PE_000536	chr2	2180004	2180354	transposon_fragment	Parent=AT2TE10030	-	TAIR10	350
PE_000536	chr2	2180355	2180570	transposable_element	ID=AT2TE10035;Name=AT2TE10035;Alias=HELITRON4	-	TAIR10	215
PE_000536	chr2	2180355	2180570	transposon_fragment	Parent=AT2TE10035	-	TAIR10	215
PE_000536	chr2	2180857	2180963	transposable_element	ID=AT2TE10040;Name=AT2TE10040;Alias=ARNOLD2	+	TAIR10	106
PE_000536	chr2	2180857	2180963	transposon_fragment	Parent=AT2TE10040	+	TAIR10	106
PE_000537	chr2	2180919	2183904	gene	ID=AT2G05760;Note=protein_coding_gene;Name=AT2G05760	+	TAIR10	1906
PE_000537	chr2	2180004	2180354	transposable_element	ID=AT2TE10030;Name=AT2TE10030;Alias=HELITRONY1A	-	TAIR10	350
PE_000537	chr2	2180004	2180354	transposon_fragment	Parent=AT2TE10030	-	TAIR10	350
PE_000537	chr2	2180355	2180570	transposable_element	ID=AT2TE10035;Name=AT2TE10035;Alias=HELITRON4	-	TAIR10	215
PE_000537	chr2	2180355	2180570	transposon_fragment	Parent=AT2TE10035	-	TAIR10	215
PE_000537	chr2	2180857	2180963	transposable_element	ID=AT2TE10040;Name=AT2TE10040;Alias=ARNOLD2	+	TAIR10	106
PE_000537	chr2	2180857	2180963	transposon_fragment	Parent=AT2TE10040	+	TAIR10	106
PE_000538	chr2	2969531	2974603	transposable_element_gene	ID=AT2G07160;Note=transposable_element_gene;Name=AT2G07160	+	TAIR10	1245
PE_000538	chr2	2975040	2978820	gene	ID=AT2G07170;Note=protein_coding_gene;Name=AT2G07170	+	TAIR10	1318
PE_000538	chr2	2971056	2973440	transposable_element	ID=AT2TE12960;Name=AT2TE12960;Alias=ATLINE1_5	+	TAIR10	82
PE_000538	chr2	2971056	2973440	transposon_fragment	Parent=AT2TE12960	+	TAIR10	82
PE_000538	chr2	2973441	2973627	transposable_element	ID=AT2TE12965;Name=AT2TE12965;Alias=TA11	+	TAIR10	186
PE_000538	chr2	2973441	2973627	transposon_fragment	Parent=AT2TE12965	+	TAIR10	186
PE_000539	chr2	2975040	2978820	gene	ID=AT2G07170;Note=protein_coding_gene;Name=AT2G07170	+	TAIR10	303
PE_000539	chr2	2980029	2980789	transposable_element	ID=AT2TE12990;Name=AT2TE12990;Alias=TAG3N1	-	TAIR10	760
PE_000539	chr2	2980029	2980789	transposon_fragment	Parent=AT2TE12990	-	TAIR10	760
PE_000539	chr2	2980899	2983602	gene	ID=AT2G07180;Note=protein_coding_gene;Name=AT2G07180	-	TAIR10	618
PE_000540	chr2	3523163	3527460	gene	ID=AT2G07690;Note=protein_coding_gene;Name=AT2G07690	-	TAIR10	1444
PE_000540	chr2	3527954	3528142	transposable_element	ID=AT2TE15380;Name=AT2TE15380;Alias=ATDNAI27T9C	-	TAIR10	188
PE_000540	chr2	3527954	3528142	transposon_fragment	Parent=AT2TE15380	-	TAIR10	188
PE_000540	chr2	3528629	3530340	transposable_element	ID=AT2TE15385;Name=AT2TE15385;Alias=ATREP18	+	TAIR10	387
PE_000540	chr2	3528629	3530340	transposon_fragment	Parent=AT2TE15385	+	TAIR10	387
PE_000541	chr2	5543181	5543610	transposable_element	ID=AT2TE22400;Name=AT2TE22400;Alias=ATCOPIA26	-	TAIR10	429
PE_000541	chr2	5543181	5543610	transposon_fragment	Parent=AT2TE22400	-	TAIR10	429
PE_000541	chr2	5544181	5556464	gene	ID=AT2G13370;Note=protein_coding_gene;Name=AT2G13370	-	TAIR10	1661
PE_000542	chr2	5673688	5675831	gene	ID=AT2G13610;Note=protein_coding_gene;Name=AT2G13610	-	TAIR10	1347
PE_000542	chr2	5677008	5677859	transposable_element	ID=AT2TE22950;Name=AT2TE22950;Alias=HELITRONY1E	-	TAIR10	476
PE_000542	chr2	5677008	5677859	transposon_fragment	Parent=AT2TE22950	-	TAIR10	476
PE_000543	chr2	6357465	6358470	gene	ID=AT2G14810;Note=protein_coding_gene;Name=AT2G14810	-	TAIR10	1005
PE_000543	chr2	6357828	6357870	transposable_element	ID=AT2TE25890;Name=AT2TE25890;Alias=RathE3_cons	+	TAIR10	42
PE_000543	chr2	6357828	6357870	transposon_fragment	Parent=AT2TE25890	+	TAIR10	42
PE_000543	chr2	6355182	6357375	gene	ID=AT2G14800;Note=protein_coding_gene;Name=AT2G14800	+	TAIR10	1728
PE_000544	chr2	6366888	6371034	gene	ID=AT2G14835;Note=protein_coding_gene;Name=AT2G14835	+	TAIR10	1394
PE_000544	chr2	6371902	6373082	pseudogene	ID=AT2G14840;Note=pseudogene;Name=AT2G14840	+	TAIR10	738
PE_000544	chr2	6371902	6373082	pseudogenic_transcript	ID=AT2G14840.1;Parent=AT2G14840;Name=AT2G14840.1;Index=1	+	TAIR10	738
PE_000544	chr2	6371902	6373082	pseudogenic_exon	Parent=AT2G14840.1	+	TAIR10	738
PE_000544	chr2	6371216	6371315	transposable_element	ID=AT2TE25960;Name=AT2TE25960;Alias=HELITRONY1D	+	TAIR10	99
PE_000544	chr2	6371216	6371315	transposon_fragment	Parent=AT2TE25960	+	TAIR10	99
PE_000545	chr2	6712936	6714586	gene	ID=AT2G15400;Note=protein_coding_gene;Name=AT2G15400	+	TAIR10	1425
PE_000545	chr2	6711939	6712118	transposable_element	ID=AT2TE27425;Name=AT2TE27425;Alias=TAG3N1	+	TAIR10	179
PE_000545	chr2	6711939	6712118	transposon_fragment	Parent=AT2TE27425	+	TAIR10	179
PE_000546	chr2	7035463	7038326	gene	ID=AT2G16230;Note=protein_coding_gene;Name=AT2G16230	-	TAIR10	713
PE_000546	chr2	7039094	7039165	gene	ID=AT2G16240;Note=tRNA;Name=AT2G16240	+	TAIR10	71
PE_000546	chr2	7039094	7039165	tRNA	ID=AT2G16240.1;Parent=AT2G16240;Name=AT2G16240.1;Index=1	+	TAIR10	71
PE_000546	chr2	7039677	7040592	gene	ID=AT2G16245;Note=other_RNA;Name=AT2G16245	+	TAIR10	915
PE_000546	chr2	7039677	7040592	ncRNA	ID=AT2G16245.1;Parent=AT2G16245;Name=AT2G16245.1;Index=1	+	TAIR10	915
PE_000546	chr2	7039682	7042933	gene	ID=AT2G16250;Note=protein_coding_gene;Name=AT2G16250	-	TAIR10	931
PE_000546	chr2	7038663	7039101	transposable_element	ID=AT2TE28655;Name=AT2TE28655;Alias=ATREP1	-	TAIR10	438
PE_000546	chr2	7038663	7039101	transposon_fragment	Parent=AT2TE28655	-	TAIR10	438
PE_000547	chr2	7044815	7044885	pseudogenic_exon	Parent=AT2G16260.1	+	TAIR10	70
PE_000547	chr2	7044914	7045064	pseudogenic_exon	Parent=AT2G16260.1	+	TAIR10	150
PE_000547	chr2	7043730	7044487	transposable_element	ID=AT2TE28670;Name=AT2TE28670;Alias=ATREP9	-	TAIR10	757
PE_000547	chr2	7043730	7044487	transposon_fragment	Parent=AT2TE28670	-	TAIR10	757
PE_000547	chr2	7045158	7045502	pseudogenic_exon	Parent=AT2G16260.1	+	TAIR10	344
PE_000547	chr2	7045538	7048326	gene	ID=AT2G16270;Note=protein_coding_gene;Name=AT2G16270	-	TAIR10	700
PE_000547	chr2	7045303	7045482	transposable_element	ID=AT2TE28675;Name=AT2TE28675;Alias=VANDAL1	-	TAIR10	179
PE_000547	chr2	7045303	7045482	transposon_fragment	Parent=AT2TE28675	-	TAIR10	179
PE_000547	chr2	7044815	7045502	pseudogene	ID=AT2G16260;Note=pseudogene;Name=AT2G16260	+	TAIR10	687
PE_000547	chr2	7044815	7045502	pseudogenic_transcript	ID=AT2G16260.1;Parent=AT2G16260;Name=AT2G16260.1;Index=1	+	TAIR10	687
PE_000548	chr2	7079796	7080248	pseudogene	ID=AT2G16367;Note=pseudogene;Name=AT2G16367	-	TAIR10	184
PE_000548	chr2	7079796	7080248	pseudogenic_transcript	ID=AT2G16367.1;Parent=AT2G16367;Name=AT2G16367.1;Index=1	-	TAIR10	184
PE_000548	chr2	7080161	7080248	pseudogenic_exon	Parent=AT2G16367.1	-	TAIR10	87
PE_000548	chr2	7081783	7084557	gene	ID=AT2G16370;Note=protein_coding_gene;Name=AT2G16370	-	TAIR10	1281
PE_000548	chr2	7081081	7081486	transposable_element	ID=AT2TE28800;Name=AT2TE28800;Alias=ATHAT7	+	TAIR10	405
PE_000548	chr2	7081081	7081486	transposon_fragment	Parent=AT2TE28800	+	TAIR10	405
PE_000549	chr2	7131520	7132803	gene	ID=AT2G16450;Note=protein_coding_gene;Name=AT2G16450	-	TAIR10	1283
PE_000549	chr2	7133390	7135652	gene	ID=AT2G16460;Note=protein_coding_gene;Name=AT2G16460	-	TAIR10	1022
PE_000550	chr2	7162976	7165323	gene	ID=AT2G16530;Note=protein_coding_gene;Name=AT2G16530	-	TAIR10	1374
PE_000550	chr2	7166107	7166440	gene	ID=AT2G16535;Note=protein_coding_gene;Name=AT2G16535	-	TAIR10	333
PE_000551	chr2	7180145	7182193	gene	ID=AT2G16570;Note=protein_coding_gene;Name=AT2G16570	-	TAIR10	1382
PE_000551	chr2	7182873	7183082	transposable_element	ID=AT2TE29240;Name=AT2TE29240;Alias=HELITRON3	-	TAIR10	209
PE_000551	chr2	7182873	7183082	transposon_fragment	Parent=AT2TE29240	-	TAIR10	209
PE_000551	chr2	7183083	7184315	transposable_element	ID=AT2TE29245;Name=AT2TE29245;Alias=ATREP10B	+	TAIR10	728
PE_000551	chr2	7183083	7184315	transposon_fragment	Parent=AT2TE29245	+	TAIR10	728
PE_000552	chr2	7392850	7395970	gene	ID=AT2G17010;Note=protein_coding_gene;Name=AT2G17010	-	TAIR10	1349
PE_000552	chr2	7396337	7398838	gene	ID=AT2G17020;Note=protein_coding_gene;Name=AT2G17020	-	TAIR10	1284
PE_000553	chr2	7466841	7471262	gene	ID=AT2G17150;Note=protein_coding_gene;Name=AT2G17150	-	TAIR10	2001
PE_000554	chr2	7472754	7474012	gene	ID=AT2G17160;Note=protein_coding_gene;Name=AT2G17160	+	TAIR10	164
PE_000554	chr2	7466841	7471262	gene	ID=AT2G17150;Note=protein_coding_gene;Name=AT2G17150	-	TAIR10	1344
PE_000555	chr2	7504756	7508394	gene	ID=AT2G17260;Note=protein_coding_gene;Name=AT2G17260	+	TAIR10	1419
PE_000555	chr2	7504390	7504411	transposable_element	ID=AT2TE30825;Name=AT2TE30825;Alias=TNAT2A	-	TAIR10	21
PE_000555	chr2	7504390	7504411	transposon_fragment	Parent=AT2TE30825	-	TAIR10	21
PE_000555	chr2	7504412	7504552	transposable_element	ID=AT2TE30830;Name=AT2TE30830;Alias=ATREP9	+	TAIR10	140
PE_000555	chr2	7504412	7504552	transposon_fragment	Parent=AT2TE30830	+	TAIR10	140
PE_000555	chr2	7503713	7504389	transposable_element	ID=AT2TE30820;Name=AT2TE30820;Alias=TNAT2A	-	TAIR10	676
PE_000555	chr2	7503713	7504389	transposon_fragment	Parent=AT2TE30820	-	TAIR10	676
PE_000556	chr2	7510100	7512387	gene	ID=AT2G17270;Note=protein_coding_gene;Name=AT2G17270	+	TAIR10	2287
PE_000557	chr2	7510100	7512387	gene	ID=AT2G17270;Note=protein_coding_gene;Name=AT2G17270	+	TAIR10	794
PE_000557	chr2	7513128	7515048	gene	ID=AT2G17280;Note=protein_coding_gene;Name=AT2G17280	+	TAIR10	1465
PE_000558	chr2	7598985	7602121	transposable_element_gene	ID=AT2G17490;Note=transposable_element_gene;Name=AT2G17490;Derives_from=AT2TE31290	-	TAIR10	233
PE_000558	chr2	7598597	7602614	transposable_element	ID=AT2TE31290;Name=AT2TE31290;Alias=ATCOPIA39	-	TAIR10	726
PE_000558	chr2	7598597	7602614	transposon_fragment	Parent=AT2TE31290	-	TAIR10	726
PE_000559	chr2	7609236	7616342	gene	ID=AT2G17510;Note=protein_coding_gene;Name=AT2G17510	-	TAIR10	3000
PE_000560	chr2	7626358	7629149	gene	ID=AT2G17530;Note=protein_coding_gene;Name=AT2G17530	+	TAIR10	1561
PE_000560	chr2	7630420	7631912	gene	ID=AT2G17540;Note=protein_coding_gene;Name=AT2G17540	-	TAIR10	168
PE_000561	chr2	7739856	7742156	gene	ID=AT2G17800;Note=protein_coding_gene;Name=AT2G17800	+	TAIR10	946
PE_000561	chr2	7742712	7742785	gene	ID=AT2G17810;Note=tRNA;Name=AT2G17810	+	TAIR10	73
PE_000561	chr2	7742712	7742785	tRNA	ID=AT2G17810.1;Parent=AT2G17810;Name=AT2G17810.1;Index=1	+	TAIR10	73
PE_000561	chr2	7742924	7748220	gene	ID=AT2G17820;Note=protein_coding_gene;Name=AT2G17820	-	TAIR10	1286
PE_000562	chr2	7826817	7828754	gene	ID=AT2G17990;Note=protein_coding_gene;Name=AT2G17990	+	TAIR10	1412
PE_000562	chr2	7829035	7830580	gene	ID=AT2G18000;Note=protein_coding_gene;Name=AT2G18000	+	TAIR10	1307
PE_000563	chr2	7829035	7830580	gene	ID=AT2G18000;Note=protein_coding_gene;Name=AT2G18000	+	TAIR10	710
PE_000564	chr2	7867828	7871642	gene	ID=AT2G18100;Note=protein_coding_gene;Name=AT2G18100	+	TAIR10	1464
PE_000564	chr2	7864314	7867766	gene	ID=AT2G18090;Note=protein_coding_gene;Name=AT2G18090	+	TAIR10	1474
PE_000565	chr2	7867828	7871642	gene	ID=AT2G18100;Note=protein_coding_gene;Name=AT2G18100	+	TAIR10	1834
PE_000565	chr2	7864314	7867766	gene	ID=AT2G18090;Note=protein_coding_gene;Name=AT2G18090	+	TAIR10	1104
PE_000566	chr2	7872251	7873912	gene	ID=AT2G18110;Note=protein_coding_gene;Name=AT2G18110	+	TAIR10	431
PE_000566	chr2	7874137	7875027	pseudogene	ID=AT2G18115;Note=pseudogene;Name=AT2G18115	+	TAIR10	890
PE_000566	chr2	7874137	7875027	pseudogenic_transcript	ID=AT2G18115.1;Parent=AT2G18115;Name=AT2G18115.1;Index=1	+	TAIR10	890
PE_000566	chr2	7874137	7875027	pseudogenic_exon	Parent=AT2G18115.1	+	TAIR10	890
PE_000566	chr2	7874418	7874504	transposable_element	ID=AT2TE32600;Name=AT2TE32600;Alias=ATMU10	+	TAIR10	86
PE_000566	chr2	7874418	7874504	transposon_fragment	Parent=AT2TE32600	+	TAIR10	86
PE_000566	chr2	7874505	7874939	transposable_element	ID=AT2TE32605;Name=AT2TE32605;Alias=VANDAL17	-	TAIR10	434
PE_000566	chr2	7874505	7874939	transposon_fragment	Parent=AT2TE32605	-	TAIR10	434
PE_000567	chr2	7942153	7943388	gene	ID=AT2G18260;Note=protein_coding_gene;Name=AT2G18260	+	TAIR10	996
PE_000567	chr2	7944814	7946001	transposable_element	ID=AT2TE32950;Name=AT2TE32950;Alias=ATREP15	+	TAIR10	578
PE_000567	chr2	7944814	7946001	transposon_fragment	Parent=AT2TE32950	+	TAIR10	578
[truncated: 3,617 more rows]

## Sheet: Table S10
Supplementary Table 10. GO analysis of protein-coding genes that overlap with intra-genic PEs
[truncated: 169 more rows]

[truncated: 4 more sheets: Table S11, Table S12, Table S13, Table S14]
